# Supplementary material for: Integration of SYT1 Interactomics and Dual-Localization Proteomics Links ER-PM Contacts to Lignin Deposition
Source: bioRxiv preprint, doi:10.64898/2026.07.06.736826, version 1 (2026-07-07)
Supplement: Supplementary Data 2 [file 736826_file04.xlsx]

## Sheet: SHEETS DESCRIPTION
Supplementary Data 2. Complete LOPIT dataset and specific ER-organelle sublists.
		SHEET NAME	DESCRIPTION
	1	SUMMARY	Nº genes and gene numbers contained on each list + Venn diagram + Applied Thresholds + Intersection lists
	2	ER-PM LOPIT	LOPIT list of DUAL ER-PM localization (applied threshold: %ER>10 and %PM>5)
	3	ER-Golgi LOPIT	LOPIT list of DUAL ER-Golgi localization (applied threshold: %ER>10 and %Golgi>5)
	4	ER-TGN LOPIT	LOPIT list of DUAL ER-TGN localization (applied threshold: %ER>10 and %TGN>5)
	5	ER-Vac. LOPIT	LOPIT list of DUAL ER-Vacuole localization (applied threshold: %ER>10 and %Vac.>5)
	6	ER-Chl. LOPIT	LOPIT list of DUAL ER-Chloroplast localization (applied threshold: %ER>10 and %Chl.>5)
	7	ER-Mit. LOPIT	LOPIT list of DUAL ER-Mitochondria localization (applied threshold: %ER>10 and %Mit.>5)
	8	ALL LOPIT PRED.	LOPIT dataset with predicted localization of all proteins (Arabidopsis Comb v1)

## Sheet: 1. SUMMARY
Nº PROTEINS										Nº PROTEINS
	ER-PM	ER-Golgi	ER-TGN	ER-Vacuole	ER-Chloroplast	ER-Mitochondria					ER-PM ∩ ER-Golgi	ER-PM ∩ ER-Chloroplast ∩ ER-Vacuole	ER-PM ∩ ER-Chloroplast	ER-PM ∩ ER-Vacuole	ER-PM ∩ ER-Mitochondria	ER-PM ∩ ER-Chloroplast ∩ ER-Golgi	ER-PM ∩ ER-Golgi ∩ ER-Vacuole	ER-Chloroplast ∩ ER-Golgi	ER-Golgi ∩ ER-Vacuole
	324	191	91	72	63	24					30	1	17	44	8	5	10	11	11
LIST OF ACC. NUMBERS										LIST OF ACC. NUMBERS
	ER-PM	ER-Golgi	ER-TGN	ER-Vacuole	ER-Chloroplast	ER-Mitochondria					ER-PM ∩ ER-Golgi	ER-PM ∩ ER-Chloroplast ∩ ER-Vacuole	ER-PM ∩ ER-Chloroplast	ER-PM ∩ ER-Vacuole	ER-PM ∩ ER-Mitochondria	ER-PM ∩ ER-Chloroplast ∩ ER-Golgi	ER-PM ∩ ER-Golgi ∩ ER-Vacuole	ER-Chloroplast ∩ ER-Golgi	ER-Golgi ∩ ER-Vacuole
	AT4G18800	AT1G27330	AT5G61820	AT2G03620	AT5G25900	AT5G17770					AT3G26180	AT2G39110	AT5G17980	AT4G35950	AT3G63520	AT5G03380	AT5G19630	AT5G53730	AT5G05987
	AT4G39990	AT1G64990	AT3G16860	AT5G63880	AT1G22610	AT5G41940					AT5G11100		AT5G43980	AT1G04780	AT5G50130	AT3G57880	AT5G12140	AT3G03680	AT4G38790
	AT3G61560	AT4G26940	AT5G16910	AT4G38540	AT5G51020	AT5G16870					AT1G29060		AT3G50920	AT3G50830	AT1G70470	AT5G19090	AT2G24765	AT4G23950	AT2G02100
	AT2G05760	AT1G20270	AT3G47540	AT3G50830	AT5G02590	AT4G08870					AT2G40880		AT4G20380	AT4G21680	AT3G58830	AT2G01660	AT1G11090	AT1G77350	AT1G79520
	AT5G64080	AT4G39350	AT1G65690	AT1G11090	AT4G16380	AT2G46000					AT2G47770		AT5G62890	AT2G37180	AT5G39410	AT5G63530	AT5G22460	AT5G42100	AT1G03820
	AT4G15430	AT4G33440	AT1G32170	AT1G16180	AT2G01320	AT5G15690					AT1G21790		AT3G11660	AT2G38440	AT3G11040		AT2G27030	AT5G19120	AT5G42420
	AT3G60190	AT3G57400	AT3G02210	AT1G67360	AT5G60800	AT5G39410					AT3G04640		AT5G49990	AT5G40000	AT1G52760		AT1G16180	AT3G53560	AT3G25040
	AT2G43420	AT5G64930	AT5G56020	AT5G45560	AT1G51570	AT1G74360					AT5G05170		AT1G60030	AT3G61760	AT4G33360		AT1G19970	AT5G38630	AT1G28400
	AT1G07810	AT2G20810	AT5G25930	AT2G17220	AT1G60030	AT5G22350					AT1G34190		AT5G22200	AT1G56330			AT3G22950	AT1G29090	AT5G45560
	AT5G65270	AT1G52420	AT5G21090	AT5G19630	AT5G17980	AT4G04775					AT1G17620		AT3G60380	AT3G23280			AT1G22750	AT5G51710	AT2G30530
	AT1G06400	AT5G15470	AT3G23150	AT3G61760	AT5G54170	AT5G50130					AT2G36950		AT1G22610	AT2G18910				AT4G32290	AT2G37540
	AT2G44610	AT5G65470	AT2G35360	AT5G58070	AT1G69700	AT3G58830					AT4G21960		AT4G16380	AT1G17820
	AT1G74520	AT2G40030	AT5G24810	AT1G22750	AT5G19090	AT2G33570					AT2G45170		AT1G51570	AT2G03350
	AT2G20990	AT5G05987	AT4G30280	AT2G37540	AT5G43980	AT2G22530					AT4G16790		AT1G60870	AT1G01540
	AT4G35240	AT5G19120	AT4G16120	AT1G79520	AT5G53730	AT5G20520					AT1G56423		AT5G24360	AT4G14600
	AT4G35860	AT2G02910	AT5G57560	AT4G13270	AT2G06010	AT1G05270					AT5G53550		AT1G14340	AT5G16250
	AT1G02120	AT2G45200	AT5G16380	AT2G18910	AT3G03680	AT1G70470					AT3G60140		AT3G10970	AT4G35780
	AT5G61740	AT5G15540	AT5G52210	AT2G38440	AT2G01660	AT1G52760					AT1G01490			AT1G67360
	AT3G61050	AT4G25720	AT2G02970	AT4G21680	AT5G49990	AT3G11040					AT5G05660			AT5G18680
	AT4G00170	AT5G19025	AT3G15356	AT1G09180	AT5G05365	AT5G15910					AT3G26190			AT5G63880
	AT1G67510	AT2G13650	AT5G49720	AT1G17820	AT5G62890	AT3G63520			APPLIED THRESHOLDS		AT1G36380			AT2G17220
	AT4G17170	AT1G18580	AT4G25810	AT1G80830	AT4G23950	AT2G27490		ER-PM LOPIT	%ER>10 and %PM>5		AT3G47960			AT1G20823
	AT2G13680	AT3G55820	AT3G29810	AT3G22950	AT1G10990	AT4G33360		ER-Golgi LOPIT	%ER>10 and %Golgi>5		AT5G56870			AT2G16700
	AT5G50160	AT1G53710	AT4G00300	AT5G05987	AT5G63530	AT1G02270		ER-TGN LOPIT	%ER>10 and %TGN>5		AT4G37520			AT1G14830
	AT5G42560	AT5G66060	AT1G73590	AT4G35780	AT2G28900			ER-Vacuole LOPIT	%ER>10 and %Vac.>5		AT3G01430			AT1G66400
	AT1G61890	AT1G07135	AT2G40880	AT4G38790	AT3G11660			ER-Chloroplast LOPIT	%ER>10 and %Chl.>5		AT2G13650			AT3G28430
	AT3G13560	AT5G46150	AT3G23430	AT3G28430	AT3G06510			ER-Mitochondria LOPIT	%ER>10 and %Mit.>5		AT5G64740			AT2G03620
	AT3G26180	AT2G02970	AT1G07135	AT1G03820	AT3G17970						AT3G27270			AT5G58070
	AT5G41600	AT4G37520	AT1G76340	AT4G14600	AT1G67690						AT3G02210			AT1G80830
	AT3G15580	AT1G10540	AT1G79610	AT1G04780	AT3G57880						AT4G39220			AT4G16520
	AT4G27120	AT5G56870	AT3G45230	AT2G02100	AT5G03380									AT4G38540
	AT1G55910	AT4G38790	AT2G33570	AT2G27030	AT1G77350									AT1G09180
	AT3G13062	AT3G27400	AT5G64640	AT1G66900	AT5G42100									AT1G01630
	AT5G11100	AT4G15470	AT3G03050	AT5G22460	AT3G10970									AT4G24260
	AT1G29060	AT2G36950	AT4G24260	AT5G16250	AT1G60870									AT1G66900
	AT2G39110	AT1G07230	AT2G23810	AT1G19970	AT1G14340									AT1G25280
	AT5G42080	AT5G21090	AT3G07160	AT5G01730	AT5G22200									AT4G33940
	AT5G55960	AT3G60140	AT5G06700	AT4G16520	AT2G16640									AT4G00550
	AT3G60600	AT2G02100	AT1G59820	AT3G61580	AT1G78620									AT5G01730
	AT5G59150	AT5G18900	AT3G52640	AT4G33940	AT4G32250									AT5G19290
	AT2G40880	AT3G18620	AT1G53390	AT5G17060	AT3G50920									AT5G49900
	AT2G17450	AT3G03680	AT4G28050	AT4G35950	AT3G58800									AT5G17060
	AT5G17980	AT3G15356	AT5G65970	AT2G37180	AT1G70280									AT4G13270
	AT2G47770	AT2G35360	AT5G39580	AT2G39110	AT3G23710									AT1G65610
	AT4G20410	AT3G02210	AT5G20230	AT2G24765	AT1G51460
	AT5G24380	AT3G01430	AT1G30900	AT4G24260	AT5G37540
	AT2G46170	AT3G04640	AT2G17480	AT1G56330	AT1G76340
	AT5G43980	AT1G20550	AT5G09870	AT5G49900	AT2G34070
	AT5G17760	AT1G19970	AT4G32410	AT4G35580	AT5G24360
	AT1G21790	AT1G36380	AT5G64740	AT3G23280	AT3G05360
	AT3G10260	AT1G76670	AT2G38440	AT4G00550	AT5G19120
	AT4G35950	AT5G49360	AT3G13560	AT1G01540	AT3G16620
	AT1G05500	AT1G79520	AT4G20410	AT1G66400	AT3G53560
	AT5G25930	AT5G15880	AT2G40940	AT5G18680	AT2G39110
	AT1G63440	AT1G34550	AT5G65660	AT2G16700	AT4G20380
	AT3G04640	AT2G24765	AT1G02310	AT1G25280	AT5G38630
	AT3G63520	AT3G47540	AT5G54690	AT5G40000	AT1G29090
	AT4G31080	AT2G43080	AT2G46990	AT2G30530	AT1G62960
	AT1G53320	AT1G03820	AT4G39220	AT2G19880	AT3G06470
	AT1G60960	AT1G29330	AT5G53550	AT5G42420	AT5G51710
	AT3G15060	AT4G21960	AT2G05760	AT1G65610	AT2G26110
	AT1G63430	AT4G19900	AT2G03240	AT2G03350	AT3G60380
	AT5G05170	AT5G53730	AT4G33440	AT5G12140	AT4G32290
	AT1G04780	AT1G77350	AT3G04640	AT5G19290
	AT1G12110	AT5G05170	AT2G45170	AT1G14830
	AT2G31200	AT3G01170	AT1G64890	AT3G03220
	AT3G50920	AT5G47780	AT1G65610	AT4G33110
	AT1G34190	AT1G35510	AT5G46150	AT3G25040
	AT1G17620	AT5G49060	AT2G39200	AT1G28400
	AT1G58360	AT3G57880	AT5G05170	AT1G01630
	AT2G36950	AT5G42660	AT2G27500	AT1G20823
	AT3G50830	AT3G22950	AT1G74360	AT4G11410
	AT4G21680	AT1G32170	AT2G17450
	AT2G37180	AT1G61820	AT2G27389
	AT5G09690	AT1G80860	AT4G20070
	AT2G43210	AT4G30280	AT3G28340
	AT4G20380	AT4G38270	AT1G20823
	AT2G38440	AT1G59590	AT4G32290
	AT5G19080	AT3G18480	AT4G19640
	AT2G44790	AT3G29810	AT2G17850
	AT5G62890	AT4G39220	AT4G24760
	AT3G07570	AT1G17580	AT3G56190
	AT1G73920	AT1G56423	AT5G61480
	AT5G03380	AT2G47320	AT3G16920
	AT3G28670	AT5G05660	AT5G57655
	AT5G40000	AT5G19740	AT1G80950
	AT1G69420	AT4G25810	AT1G29090
	AT2G13820	AT3G26190	AT4G35480
	AT2G40190	AT2G44500	AT5G20500
	AT3G61760	AT5G42420	AT3G14680
	AT4G04695	AT3G25040	AT3G03160
	AT5G61730	AT5G14430
	AT5G40170	AT3G24820
	AT4G19640	AT5G57560
	AT5G60860	AT3G03305
	AT5G11890	AT5G12140
	AT2G42360	AT2G47770
	AT1G07670	AT1G02310
	AT3G44630	AT1G28400
	AT4G21960	AT4G35820
	AT3G11660	AT4G23950
	AT5G60340	AT5G63530
	AT3G43810	AT5G54690
	AT5G62865	AT5G57220
	AT2G45170	AT4G24530
	AT5G64990	AT4G39090
	AT4G16790	AT5G16910
	AT5G16550	AT1G29060
	AT1G56330	AT5G22460
	AT1G73590	AT1G21790
	AT5G49990	AT1G70630
	AT3G23280	AT1G22750
	AT2G18910	AT1G01490
	AT4G20830	AT5G38630
	AT1G56423	AT3G63340
	AT1G70750	AT5G53550
	AT1G19940	AT5G35570
	AT1G11890	AT3G01040
	AT1G60030	AT2G03240
	AT5G53550	AT5G07960
	AT5G65660	AT1G29090
	AT4G39400	AT4G36010
	AT3G60140	AT2G27030
	AT1G73650	AT3G26180
	AT5G06320	AT5G45560
	AT5G10260	AT1G56710
	AT1G17820	AT1G80290
	AT1G10410	AT3G51610
	AT3G54010	AT2G40880
	AT3G19460	AT5G11790
	AT2G14060	AT2G30530
	AT2G03350	AT4G32290
	AT1G01490	AT3G53560
	AT5G22200	AT5G19090
	AT1G01540	AT2G01660
	AT5G64640	AT3G14860
	AT3G18370	AT1G03260
	AT2G47900	AT2G45170
	AT1G57990	AT4G14455
	AT4G14600	AT1G75800
	AT3G47790	AT5G27330
	AT5G16250	AT1G66180
	AT4G35780	AT5G51710
	AT1G67360	AT3G27270
	AT5G18680	AT5G64600
	AT4G23630	AT1G21900
	AT4G33120	AT1G11090
	AT1G51740	AT4G31340
	AT1G53590	AT2G27389
	AT5G09870	AT5G57510
	AT3G57880	AT3G27325
	AT5G49580	AT5G64740
	AT5G63880	AT5G52210
	AT3G49360	AT3G47960
	AT2G17220	AT2G47760
	AT5G56590	AT5G06700
	AT1G20823	AT5G03380
	AT3G56190	AT2G37540
	AT2G16700	AT5G11100
	AT1G01470	AT2G24940
	AT1G16920	AT3G22845
	AT3G49645	AT5G44370
	AT5G06750	AT1G16180
	AT5G52240	AT1G69460
	AT5G09260	AT5G42100
	AT5G05660	AT3G54260
	AT4G30600	AT1G17620
	AT3G26190	AT1G57620
	AT3G60380	AT5G58060
	AT5G07250	AT5G65970
	AT5G19630	AT4G16790
	AT1G36380	AT1G34190
	AT1G64090	AT3G52060
	AT1G59820	AT1G18190
	AT2G27080	AT2G18030
	AT5G50130	AT5G43860
	AT1G14830	AT4G16180
	AT1G60800	AT3G13790
	AT4G25835	AT5G19630
	AT4G38670	AT4G14420
	AT2G25060	AT5G04990
	AT1G66400	AT3G49880
	AT1G22610	AT1G78830
	AT3G47960	AT1G62330
	AT5G24810	AT3G58790
	AT5G26040	AT2G31710
	AT3G28430	AT3G03050
	AT2G03620	AT5G53540
	AT3G07160	AT3G09090
	AT5G56610	AT5G41870
	AT4G16380	AT3G62360
	AT5G56870
	AT5G49720
	AT1G70470
	AT5G58070
	AT1G80830
	AT4G37520
	AT5G03280
	AT3G12870
	AT2G15900
	AT2G04780
	AT3G27200
	AT3G55600
	AT5G12140
	AT4G16520
	AT3G17000
	AT3G58830
	AT4G38540
	AT3G19640
	AT4G00090
	AT2G24765
	AT1G11090
	AT1G56120
	AT1G09180
	AT5G22460
	AT2G18040
	AT4G35480
	AT1G01630
	AT4G24260
	AT3G01430
	AT5G39410
	AT4G27840
	AT5G43710
	AT5G48450
	AT1G66900
	AT2G13650
	AT4G11220
	AT2G27810
	AT4G16265
	AT4G27970
	AT1G65690
	AT4G16120
	AT2G31960
	AT3G43110
	AT1G34210
	AT3G11040
	AT5G64740
	AT5G65700
	AT1G51570
	AT1G52760
	AT5G61480
	AT2G17705
	AT4G10790
	AT2G27030
	AT2G21050
	AT1G08820
	AT3G27270
	AT5G13710
	AT1G53390
	AT3G16340
	AT2G23810
	AT1G25280
	AT5G48060
	AT3G02210
	AT1G04150
	AT4G32410
	AT5G25590
	AT4G33940
	AT1G07410
	AT4G39220
	AT1G63120
	AT4G08230
	AT1G60870
	AT5G24360
	AT1G14340
	AT3G62250
	AT5G40370
	AT1G16180
	AT3G48890
	AT3G52640
	AT2G32660
	AT4G00550
	AT2G36300
	AT3G49060
	AT5G01730
	AT4G33360
	AT5G37740
	AT5G19290
	AT3G51650
	AT2G39200
	AT1G65720
	AT5G66160
	AT1G15240
	AT5G19090
	AT1G19970
	AT2G01660
	AT3G22950
	AT3G19340
	AT1G61900
	AT2G07050
	AT5G49900
	AT1G22750
	AT1G02145
	AT5G45420
	AT4G24760
	AT1G62040
	AT5G17060
	AT4G04860
	AT4G29330
	AT1G74720
	AT3G57340
	AT4G04620
	AT5G63530
	AT1G43890
	AT5G35460
	AT4G00900
	AT4G34100
	AT4G13270
	AT5G23390
	AT1G19310
	AT2G17480
	AT4G22330
	AT2G29640
	AT1G29760
	AT3G29170
	AT1G65610
	AT3G10970
	AT1G78800
	AT4G35730
	AT3G20120
	AT3G06060
	AT4G33360
	AT2G45510
	AT5G45160

## Sheet: 2. ER-PM LOPIT
protein_id	alt_ids	gene_name	description	prediction	train_organelle	suborganelle	pred_class1	pred_class2	p_val	p_val_single	p_val_dual	completeness	ER	PM	CHLOROPLAST	CYTOSOL	EXTRACELLULAR	GOLGI	MITOCHONDRION	NUCLEUS	PEROXISOME	TGN	UNKNOWN	VACUOLE	ER+PM	ER-PM	(ER+PM)*(1-ABS(ER-PM))
Q9SN35	AT4G18800	RABA1D	Ras-related protein RABA1d	PM+ER	UNKNOWN	UNKNOWN	PM	ER	0	0.48324	0	1	0.44698	0.48855	0.00381	0.0041	0.00732	0.009	0.00305	0.00303	0.00463	0.01243	0.00906	0.00803	0.93553	0.04157	0.89664
Q9SMQ6	AT4G39990	RABA4B	Ras-related protein RABA4b	ER+PM	UNKNOWN	UNKNOWN	ER	PM	0	0.50254	0	1	0.43741	0.43556	0.04666	0.00194	0.00686	0.0029	0.00227	0.00255	0.03166	0.01729	0.011	0.00389	0.87297	0.00185	0.871355
Q6DBN4	AT3G61560	RTNLB6	Reticulon-like protein B6	PM+ER	UNKNOWN	UNKNOWN	PM	ER	0	0.47161	0	1	0.42466	0.48726	0.00465	0.00184	0.01343	0.0225	0.00374	0.00428	0.00293	0.026	0.00238	0.00633	0.91192	0.0626	0.854834
Q9SHZ3	AT2G05760	NAT1	Nucleobase-ascorbate transporter 1	ER+PM	UNKNOWN	UNKNOWN	ER	PM	0	0.52361	0	0.5	0.4408	0.42443	0.03346	0.0012	0.00465	0.01788	0.00295	0.00205	0.00748	0.0504	0.00644	0.00826	0.86523	0.01637	0.851066
Q8VYI9	AT5G64080	LTPG31	Non-specific lipid transfer protein GPI-anchored 31	ER+PM	UNKNOWN	UNKNOWN	ER	PM	0	0.46737	0	1	0.5139	0.41953	0.00404	0.00252	0.01002	0.01273	0.00344	0.00343	0.00433	0.01016	0.00271	0.01319	0.93343	0.09437	0.845342
Q8VZM5	AT4G15430	OSCA1.6	Hyperosmolality-gated Ca2+ permeable channel 1.6	PM+ER	UNKNOWN	UNKNOWN	PM	ER	0	0.51711	0	1	0.42237	0.4262	0.00753	0.00274	0.00989	0.08922	0.00511	0.00579	0.00309	0.01766	0.00507	0.00535	0.84857	0.00383	0.84532
Q9FNX5	AT3G60190	DRP1E	Phragmoplastin DRP1E	ER+PM	UNKNOWN	UNKNOWN	ER	PM	0	0.49113	0	1	0.44484	0.41795	0.00702	0.00601	0.01037	0.0401	0.00536	0.00516	0.01124	0.00294	0.00608	0.04292	0.86279	0.02689	0.83959
A9X4U2	AT2G43420	3BETAHSD/D3	3beta-hydroxysteroid-dehydrogenase/decarboxylase isoform 3	ER+PM	UNKNOWN	UNKNOWN	ER	PM	0	0.46857	0	1	0.46706	0.40089	0.0064	0.00381	0.01537	0.07226	0.0049	0.007	0.00314	0.01098	0.00368	0.00451	0.86795	0.06617	0.810518
P92939	AT1G07810	ECA1	Calcium-transporting ATPase 1, endoplasmic reticulum-type	ER+PM	UNKNOWN	UNKNOWN	ER	PM	0	0.43841	0	1	0.52412	0.39892	0.00557	0.00184	0.01173	0.02098	0.00333	0.01184	0.0042	0.00857	0.00433	0.00458	0.92304	0.1252	0.807475
Q9FJN8	AT5G65270	RABA4A	Ras-related protein RABA4a	ER+PM	UNKNOWN	UNKNOWN	ER	PM	0	0.46246	0	1	0.46673	0.38836	0.00266	0.0092	0.01321	0.03494	0.00398	0.00265	0.00266	0.03977	0.00449	0.03135	0.85509	0.07837	0.788077
P28185	AT1G06400	RABA1A	Ras-related protein RABA1a	ER+PM	UNKNOWN	UNKNOWN	ER	PM	0	0.44776	0	1	0.47914	0.36681	0.0039	0.00401	0.01645	0.04717	0.00456	0.00276	0.00268	0.02479	0.00248	0.04525	0.84595	0.11233	0.750924
O80501	AT2G44610	RABH1B	Ras-related protein RABH1b	ER+PM+extracellular?	UNKNOWN	UNKNOWN	ER	PM	0	0.50362	0	1	0.42781	0.36808	0.00452	0.03716	0.10951	0.00885	0.00505	0.01176	0.00564	0.00714	0.00593	0.00855	0.79589	0.05973	0.748351
Q9S7V4	AT1G74520	HVA22A	HVA22-like protein a	ER+PM	UNKNOWN	UNKNOWN	ER	PM	0	0.42181	0	1	0.54006	0.36077	0.03658	0.0012	0.00848	0.0264	0.00343	0.0034	0.00543	0.00557	0.00449	0.00419	0.90083	0.17929	0.73932
F4IFM7	AT2G20990	SYTA	Synaptotagmin A	ER+PM	UNKNOWN	UNKNOWN	ER	PM	0	0.34307	0	1	0.56609	0.36232	0.00598	0.00192	0.00677	0.0257	0.00432	0.00503	0.00391	0.00951	0.00287	0.00558	0.92841	0.20377	0.739228
F4JMA6	AT4G35240	F4JMA6	DNA-directed RNA polymerase subunit beta, putative	PM+ER	UNKNOWN	UNKNOWN	PM	ER	0	0.42879	0	1	0.35919	0.49404	0.01146	0.00242	0.00996	0.08735	0.00481	0.00538	0.00428	0.00952	0.00609	0.00549	0.85323	0.13485	0.738172
Q38922	AT4G35860	RABB1B	Ras-related protein RABB1b	ER+PM	UNKNOWN	UNKNOWN	ER	PM	0	0.34379	0	1	0.5453	0.35689	0.00445	0.00223	0.00477	0.02976	0.00939	0.00283	0.00303	0.00995	0.00285	0.02855	0.90219	0.18841	0.732208
F4HVW5	AT1G02120	VAD1	Protein VASCULAR ASSOCIATED DEATH 1, chloroplastic	PM+ER	UNKNOWN	ER	PM	ER	0	0.41615	0	1	0.35219	0.49818	0.00596	0.0143	0.02227	0.07131	0.00626	0.00626	0.00336	0.0056	0.00573	0.00858	0.85037	0.14599	0.726224
Q9FLT4	AT5G61740	ABCA10	ABC transporter A family member 10	PM+ER	UNKNOWN	PM	PM	ER	0	0.36904	0	0.7619	0.34984	0.55296	0.00366	0.00313	0.00824	0.02299	0.0033	0.00503	0.00521	0.00726	0.0079	0.03048	0.9028	0.20312	0.719423
Q9LEX1	AT3G61050	CLB	Calcium-dependent lipid-binding protein	PM+ER	UNKNOWN	UNKNOWN	PM	ER	0	0.29565	0	1	0.34063	0.57082	0.00646	0.00218	0.00962	0.03692	0.00488	0.00572	0.00438	0.01114	0.00349	0.00377	0.91145	0.23019	0.701643
Q84WW5	AT4G00170	PVA13	Vesicle-associated protein 1-3	PM+ER	UNKNOWN	UNKNOWN	PM	ER	0	0.34792	0	0.86905	0.33686	0.5362	0.00545	0.00835	0.02482	0.05393	0.00492	0.00846	0.00254	0.0074	0.00602	0.00506	0.87306	0.19934	0.699024
O64794	AT1G67510	F12B7.6	non-specific serine/threonine protein kinase	PM+ER	UNKNOWN	UNKNOWN	PM	ER	0	0.44166	0	0.86905	0.33517	0.48807	0.00792	0.00521	0.01944	0.00375	0.00313	0.04113	0.01014	0.00626	0.06553	0.01425	0.82324	0.1529	0.697367
P92963	AT4G17170	RABB1C	Ras-related protein RABB1c	ER+PM	UNKNOWN	UNKNOWN	ER	PM	0	0.29867	0	1	0.54895	0.33307	0.00563	0.00226	0.00416	0.02963	0.01024	0.003	0.0048	0.00542	0.00374	0.04909	0.88202	0.21588	0.69161
Q3B724	AT2G13680	CALS5	Callose synthase 5	PM+ER	UNKNOWN	UNKNOWN	PM	ER	0	0.51123	0	0.75	0.33114	0.49707	0.00584	0.00988	0.00965	0.01516	0.00952	0.00561	0.01341	0.01922	0.07823	0.00526	0.82821	0.16593	0.690785
Q8VY13	AT5G50160	FRO8	Ferric reduction oxidase 8, mitochondrial	PM+ER	UNKNOWN	UNKNOWN	PM	ER	0	0.2577	0	1	0.33042	0.5901	0.00791	0.00166	0.01288	0.02574	0.00309	0.0041	0.00411	0.01181	0.00355	0.00464	0.92052	0.25968	0.681479
Q8LE10	AT5G42560	HVA22I	HVA22-like protein i	ER+PM	UNKNOWN	UNKNOWN	ER	PM	0	0.34486	0	1	0.54483	0.32421	0.00753	0.0041	0.00695	0.07503	0.00465	0.004	0.00289	0.00718	0.00524	0.01341	0.86904	0.22062	0.677312
O80695	AT1G61890	DTX37	Protein DETOXIFICATION 37	PM+ER	UNKNOWN	UNKNOWN	PM	ER	0	0.3985	0	0.75	0.32242	0.52441	0.00542	0.00391	0.05055	0.03264	0.00424	0.00321	0.00514	0.013	0.0025	0.03257	0.84683	0.20199	0.675779
Q94CD8	AT3G13560	Q94CD8	Glucan endo-1,3-beta-glucosidase 4	ER+PM	UNKNOWN	UNKNOWN	ER	PM	0	0.3299	0	1	0.53984	0.32235	0.00436	0.00156	0.00832	0.00687	0.00242	0.0033	0.02513	0.07754	0.00502	0.00329	0.86219	0.21749	0.674672
Q9LTM3	AT3G26180	CYP71B20	Cytochrome P450 71B20	ER+PM+golgi?	UNKNOWN	ER	ER	PM	0	0.44849	0	1	0.50376	0.31799	0.01067	0.00463	0.00823	0.11502	0.00642	0.00552	0.00228	0.01512	0.00582	0.00454	0.82175	0.18577	0.669094
Q9FFS0	AT5G41600	RTNLB4	Reticulon-like protein B4	ER+PM	UNKNOWN	UNKNOWN	ER	PM	0	0.27942	0	1	0.56784	0.3202	0.0052	0.00242	0.00887	0.05647	0.00441	0.0039	0.00276	0.01707	0.00249	0.00838	0.88804	0.24764	0.668126
Q9LRP7	AT3G15580	ATG8I	Autophagy-related protein 8i	?ER+PM+extracellular	UNKNOWN	UNKNOWN	UNKNOWN	UNKNOWN	0.65626	0.65626	0.00411	0.7381	0.3679	0.32725	0.00574	0.06795	0.17175	0.01549	0.00713	0.00494	0.00439	0.01202	0.00383	0.01161	0.69515	0.04065	0.666892
Q94C53	AT4G27120	Q94C53	DDRGK domain-containing protein 1	ER+PM	UNKNOWN	UNKNOWN	ER	PM	0	0.39685	0	1	0.46718	0.3167	0.00562	0.0589	0.0555	0.047	0.00673	0.01056	0.00391	0.004	0.00734	0.01658	0.78388	0.15048	0.665922
Q94EG9	AT1G55910	ZIP11	Zinc transporter 11	PM+ER	UNKNOWN	UNKNOWN	PM	ER	0	0.41287	0	0.82143	0.31042	0.48399	0.00805	0.00445	0.01756	0.00528	0.00395	0.09301	0.01157	0.0046	0.03851	0.01861	0.79441	0.17357	0.656524
Q94C36	AT3G13062	Q94C36	At3g13062	PM+ER	UNKNOWN	UNKNOWN	PM	ER	0	0.37633	0	0.86905	0.30353	0.52547	0.00705	0.00418	0.01165	0.09347	0.0047	0.00517	0.00251	0.02674	0.00946	0.00609	0.829	0.22194	0.645012
A0JJX5	AT5G11100	SYT4	Synaptotagmin-4	PM+ER+golgi?	UNKNOWN	UNKNOWN	PM	ER	0	0.26304	0	1	0.30172	0.52914	0.00673	0.00373	0.01207	0.10888	0.00642	0.005	0.00297	0.01258	0.00331	0.00744	0.83086	0.22742	0.641906
Q8L9S0	AT1G29060	Q8L9S0	Bet1-like protein At1g29060	ER+PM+golgi?	UNKNOWN	GOLGI CIS	ER	PM	0	0.45059	0	1	0.47342	0.30088	0.01014	0.00412	0.00664	0.12675	0.00536	0.00426	0.00237	0.01655	0.02952	0.01999	0.7743	0.17254	0.640702
A0A1P8B0K8	AT2G39110	PBL38	non-specific serine/threonine protein kinase	?PM+ER+unknown	UNKNOWN	UNKNOWN	UNKNOWN	UNKNOWN	0.60935	0.60935	0.01695	0.63095	0.31282	0.34886	0.06158	0.0035	0.01287	0.02286	0.00321	0.00711	0.00462	0.00681	0.15026	0.06551	0.66168	0.03604	0.637833
P42697	AT5G42080	DRP1A	Phragmoplastin DRP1A	ER+PM	UNKNOWN	UNKNOWN	ER	PM	0	0.27002	0	1	0.54373	0.29763	0.00637	0.0142	0.01941	0.0329	0.00495	0.00541	0.01569	0.00282	0.00808	0.04881	0.84136	0.2461	0.634301
Q93XX1	AT5G55960	MYN21.7	Transmembrane protein C9orf5 protein	PM+ER	UNKNOWN	UNKNOWN	PM	ER	0	0.19052	0	1	0.30295	0.60541	0.0094	0.00298	0.00649	0.01134	0.00833	0.00808	0.01834	0.00451	0.01767	0.00449	0.90836	0.30246	0.633617
Q8VZ95	AT3G60600	PVA11	Vesicle-associated protein 1-1	PM+ER+nucleus?	UNKNOWN	UNKNOWN	PM	ER	0	0.30596	0	1	0.28903	0.51219	0.00849	0.00445	0.02749	0.01698	0.006	0.11057	0.00811	0.0064	0.00715	0.00313	0.80122	0.22316	0.62242
Q9FIF9	AT5G59150	RABA2D	Ras-related protein RABA2d	PM+ER	UNKNOWN	UNKNOWN	PM	ER	0	0.27811	0	0.97619	0.29404	0.6172	0.00424	0.00328	0.01726	0.0079	0.00585	0.00347	0.00548	0.00583	0.00738	0.02807	0.91124	0.32316	0.616764
Q41906	AT2G40880	CYS3	Cysteine proteinase inhibitor 3	?ER+PM+tgn+golgi?	UNKNOWN	UNKNOWN	UNKNOWN	UNKNOWN	0.60986	0.60986	0.01377	0.7381	0.35041	0.29883	0.00596	0.0032	0.01283	0.12862	0.00485	0.00772	0.00403	0.17233	0.0067	0.00451	0.64924	0.05158	0.615752
O22755	AT2G17450	ATL44	Probable E3 ubiquitin-protein ligase ATL44	PM+ER	UNKNOWN	UNKNOWN	PM	ER	0	0.25719	0	0.63095	0.28841	0.57763	0.00591	0.00229	0.01048	0.02869	0.00327	0.00891	0.00357	0.0548	0.01275	0.00329	0.86604	0.28922	0.615564
Q9FJG3	AT5G17980	MCTP16	Multiple C2 domain and transmembrane region protein 16	?ER+PM+CHLOROPLAST	UNKNOWN	UNKNOWN	UNKNOWN	UNKNOWN	0.66359	0.66359	0.09664	1	0.39394	0.28899	0.26109	0.00163	0.00408	0.01417	0.00285	0.00413	0.0138	0.00316	0.00883	0.00334	0.68293	0.10495	0.611256
O82245	AT2G47770	TSPO	Translocator protein homolog	?PM+ER+golgi	UNKNOWN	UNKNOWN	UNKNOWN	UNKNOWN	0.46825	0.46825	0.00119	0.77381	0.28161	0.47012	0.0089	0.00277	0.00786	0.17192	0.00665	0.00597	0.00274	0.02656	0.00825	0.00666	0.75173	0.18851	0.610021
Q9SPE5	AT4G20410	GSNAP	Gamma-soluble NSF attachment protein	PM+ER+tgn?	UNKNOWN	UNKNOWN	PM	ER	0	0.28618	0	1	0.28073	0.54104	0.00207	0.00477	0.01734	0.01513	0.00269	0.00366	0.00502	0.11138	0.00431	0.01187	0.82177	0.26031	0.607855
Q6R3K9	AT5G24380	YSL2	Metal-nicotianamine transporter YSL2	PM+ER	UNKNOWN	UNKNOWN	PM	ER	0	0.2149	0	1	0.28889	0.63522	0.00837	0.0014	0.02293	0.00754	0.00244	0.00473	0.00818	0.01298	0.00379	0.00352	0.92411	0.34633	0.604063
O82352	AT2G46170	RTNLB5	Reticulon-like protein B5	PM+ER	UNKNOWN	UNKNOWN	PM	ER	0	0.13333	0	1	0.28014	0.60949	0.00435	0.0022	0.01535	0.04564	0.00454	0.00406	0.00259	0.01719	0.00223	0.01221	0.88963	0.32935	0.59663
Q8GXV7	AT5G43980	PDLP1	Plasmodesmata-located protein 1	?ER+PM+CHLOROPLAST	UNKNOWN	UNKNOWN	UNKNOWN	UNKNOWN	0.52103	0.52103	0.03508	1	0.45931	0.27149	0.22996	0.00101	0.0049	0.00469	0.00221	0.00296	0.00984	0.00685	0.00452	0.00224	0.7308	0.18782	0.593541
Q9FN75	AT5G17760	Q9FN75	AAA-ATPase At5g17760	PM+ER	UNKNOWN	UNKNOWN	PM	ER	0	0.18991	0	1	0.28279	0.65741	0.00472	0.00172	0.00712	0.01319	0.00917	0.00352	0.00413	0.0045	0.00277	0.00895	0.9402	0.37462	0.587982
Q9XHZ7	AT1G21790	Q9XHZ7	F8K7.23	PM+ER+golgi	UNKNOWN	UNKNOWN	PM	ER	0.00091	0.3948	0.00091	0.84524	0.26542	0.48481	0.01032	0.00429	0.01214	0.16687	0.00657	0.01197	0.00249	0.01181	0.01676	0.00655	0.75023	0.21939	0.585637
Q9SS37	AT3G10260	RTNLB8	Reticulon-like protein B8	ER+PM	UNKNOWN	UNKNOWN	ER	PM	0	0.14453	0	1	0.61395	0.27301	0.00558	0.00287	0.00811	0.0577	0.00482	0.00441	0.00277	0.01834	0.00271	0.00572	0.88696	0.34094	0.58456
Q9SBJ6	AT4G35950	ARAC6	Rac-like GTP-binding protein ARAC6	PM+ER	UNKNOWN	UNKNOWN	PM	ER	0	0.30993	0	0.97619	0.26576	0.58186	0.00378	0.00368	0.01213	0.01243	0.00356	0.00514	0.00259	0.01222	0.00923	0.08765	0.84762	0.3161	0.579687
Q8L706	AT1G05500	SYT5	Synaptotagmin-5	PM+ER	UNKNOWN	UNKNOWN	PM	ER	0	0.09096	0	1	0.27096	0.63586	0.00549	0.00245	0.01282	0.0387	0.00443	0.00761	0.00417	0.01048	0.00354	0.00348	0.90682	0.3649	0.575921
Q9XGZ2	AT5G25930	T1N24.22	Kinase family with leucine-rich repeat domain-containing protein	?TGN+ER+PM	UNKNOWN	UNKNOWN	UNKNOWN	UNKNOWN	0.60729	0.60729	0.31666	1	0.30448	0.28333	0.00516	0.00212	0.02792	0.00768	0.00283	0.00336	0.01451	0.33895	0.00599	0.00367	0.58781	0.02115	0.575378
Q9SH30	AT1G63440	HMA5	Probable copper-transporting ATPase HMA5	PM+ER	UNKNOWN	UNKNOWN	PM	ER	0	0.09547	0	1	0.26767	0.61811	0.0049	0.00179	0.01115	0.05098	0.00425	0.0042	0.00356	0.02461	0.00292	0.00588	0.88578	0.35044	0.575367
Q9SR10	AT3G04640	Q9SR10	At3g04640	?ER+PM+GOLGI	UNKNOWN	UNKNOWN	UNKNOWN	UNKNOWN	0.60489	0.60489	0.14447	0.86905	0.38262	0.26632	0.00814	0.00264	0.00599	0.23566	0.00541	0.00361	0.00373	0.05656	0.00833	0.02098	0.64894	0.1163	0.573468
O65572	AT3G63520	CCD1	Carotenoid 9,10(9',10')-cleavage dioxygenase 1	PM+ER	UNKNOWN	UNKNOWN	PM	ER	0	0.18767	0	1	0.25641	0.55377	0.00752	0.00358	0.00711	0.00508	0.0842	0.00455	0.05911	0.00597	0.00408	0.00861	0.81018	0.29736	0.569265
Q8L766	AT4G31080	LNP22	At4g31080	ER+PM	UNKNOWN	UNKNOWN	ER	PM	0	0.21773	0	0.75	0.60771	0.26192	0.00431	0.00413	0.06217	0.01395	0.00317	0.00396	0.00336	0.02336	0.0025	0.00946	0.86963	0.34579	0.568921
Q93VI8	AT1G53320	TULP7	Tubby-like F-box protein 7	ER+PM+unknown?	UNKNOWN	UNKNOWN	ER	PM	1e-05	0.29716	1e-05	0.63095	0.54171	0.25444	0.00857	0.00547	0.00668	0.00276	0.00928	0.00893	0.01467	0.00747	0.1178	0.02222	0.79615	0.28727	0.56744
A0A1P8ARJ0	AT1G60960	IRT3	Iron regulated transporter 3	PM+ER	UNKNOWN	UNKNOWN	PM	ER	0	0.22761	0	0.61905	0.25701	0.57996	0.0067	0.00207	0.00859	0.07781	0.00566	0.00394	0.00267	0.00873	0.00294	0.04392	0.83697	0.32295	0.566671
Q9LK99	AT3G15060	RABA1G	Ras-related protein RABA1g	PM+ER+cytosol?	UNKNOWN	UNKNOWN	PM	ER	5e-05	0.34403	5e-05	1	0.25279	0.4684	0.00419	0.10581	0.08395	0.01782	0.00794	0.00433	0.0045	0.00824	0.00402	0.03802	0.72119	0.21561	0.565694
F4I233	AT1G63430	F4I233	Leucine-rich repeat protein kinase family protein	PM+ER	UNKNOWN	UNKNOWN	PM	ER	0	0.21293	0	0.5	0.26265	0.63385	0.00827	0.00257	0.00659	0.01929	0.01145	0.00606	0.00416	0.01392	0.02802	0.00318	0.8965	0.3712	0.563719
Q941L0	AT5G05170	CESA3	Cellulose synthase A catalytic subunit 3 [UDP-forming]	?PM+ER+GOLGI	UNKNOWN	UNKNOWN	UNKNOWN	UNKNOWN	0.57104	0.57104	0.12217	1	0.2581	0.36301	0.00472	0.00439	0.01351	0.24166	0.00582	0.00348	0.00367	0.07309	0.00306	0.02548	0.62111	0.10491	0.555949
Q8GXW8	AT1G04780	Q8GXW8	Ankyrin repeat family protein	?PM+ER+extracellular?+vacuole?	UNKNOWN	PM	UNKNOWN	UNKNOWN	0.68338	0.68338	0.02872	1	0.27308	0.28464	0.00537	0.07574	0.1468	0.01753	0.00682	0.0056	0.01443	0.0061	0.04934	0.11455	0.55772	0.01156	0.551273
Q05085	AT1G12110	NPF6.3	Protein NRT1/ PTR FAMILY 6.3	?ER+PM+EXTRACELLULAR	UNKNOWN	UNKNOWN	UNKNOWN	UNKNOWN	0.63846	0.63846	0.10202	0.84524	0.39734	0.24952	0.00418	0.01028	0.23668	0.00604	0.00452	0.00414	0.01325	0.02801	0.00386	0.04217	0.64686	0.14782	0.551241
Q9ZSK2	AT2G31200	ADF6	Actin-depolymerizing factor 6	PM+ER	UNKNOWN	UNKNOWN	PM	ER	0	0.08343	0	0.88095	0.25393	0.63499	0.00355	0.00844	0.03878	0.01857	0.0034	0.01534	0.00392	0.00747	0.00439	0.00723	0.88892	0.38106	0.550188
F4J220	AT3G50920	LPPE1	Lipid phosphate phosphatase epsilon 1, chloroplastic	?PM+ER+chloroplast?	UNKNOWN	UNKNOWN	UNKNOWN	UNKNOWN	0.41529	0.41529	0.01576	0.83333	0.23929	0.5378	0.14793	0.00233	0.01258	0.00981	0.00166	0.00446	0.01788	0.00428	0.01796	0.004	0.77709	0.29851	0.545121
Q9XIC5	AT1G34190	NAC017	NAC domain-containing protein 17	PM+ER+golgi?	UNKNOWN	UNKNOWN	PM	ER	1e-05	0.35463	1e-05	0.86905	0.23754	0.48205	0.00991	0.01372	0.05264	0.10294	0.00773	0.06529	0.00387	0.00882	0.01249	0.00301	0.71959	0.24451	0.543643
Q9LNP3	AT1G17620	Q9LNP3	At1g17620/F11A6_23	PM+ER+golgi?	UNKNOWN	UNKNOWN	PM	ER	0	0.09936	0	1	0.23985	0.59285	0.00901	0.0021	0.01088	0.10762	0.00614	0.00545	0.00657	0.00761	0.00482	0.00708	0.8327	0.353	0.538757
Q42400	AT1G58360	AAP1	Amino acid permease 1	PM+ER	UNKNOWN	UNKNOWN	PM	ER	0	0.09597	0	0.75	0.24524	0.64385	0.00338	0.00279	0.01696	0.02054	0.00256	0.00508	0.00258	0.0369	0.00441	0.01569	0.88909	0.39861	0.53469
Q9SJL2	AT2G36950	HIPP05	Heavy metal-associated isoprenylated plant protein 5	?ER+GOLGI+PM	UNKNOWN	UNKNOWN	UNKNOWN	UNKNOWN	0.64852	0.64852	0.27292	1	0.34383	0.24621	0.03968	0.00397	0.00622	0.27556	0.00549	0.00847	0.00613	0.01026	0.04832	0.00586	0.59004	0.09762	0.53244
Q9SVL6	AT3G50830	COR413PM2	Cold-regulated 413 plasma membrane protein 2	?VACUOLE+PM+ER	UNKNOWN	UNKNOWN	UNKNOWN	UNKNOWN	0.63748	0.63748	0.18339	1	0.26386	0.27207	0.00477	0.01134	0.04261	0.03681	0.00472	0.00355	0.00441	0.00642	0.00581	0.34362	0.53593	0.00821	0.53153
Q8GXN2	AT4G21680	NPF7.2	Protein NRT1/ PTR FAMILY 7.2	ER+PM+vacuole?	UNKNOWN	UNKNOWN	ER	PM	0.00041	0.19424	0.00041	1	0.51554	0.22517	0.00447	0.00582	0.04964	0.0343	0.00445	0.00311	0.00349	0.02289	0.00274	0.12838	0.74071	0.29037	0.52563
P30302	AT2G37180	PIP2-3	Aquaporin PIP2-3	?PM+ER+vacuole?	UNKNOWN	UNKNOWN	UNKNOWN	UNKNOWN	0.45178	0.45178	0.03033	0.5	0.22371	0.51724	0.00311	0.02028	0.08066	0.00868	0.00362	0.0145	0.00729	0.00685	0.00974	0.10433	0.74095	0.29353	0.523459
A0A1P8BFB5	AT5G09690	MGT7	Magnesium transporter	?PM+ER+UNKNOWN	UNKNOWN	UNKNOWN	UNKNOWN	UNKNOWN	0.68469	0.68469	0.20029	0.59524	0.2419	0.33437	0.04093	0.00325	0.00667	0.00875	0.01991	0.00746	0.06882	0.00622	0.24097	0.02075	0.57627	0.09247	0.522982
Q9ZW74	AT2G43210	PUX11	Plant UBX domain-containing protein 11	PM+ER	UNKNOWN	UNKNOWN	PM	ER	0	0.32077	0	1	0.22345	0.47818	0.00449	0.08335	0.09885	0.00317	0.00519	0.00975	0.0133	0.00783	0.05902	0.01341	0.70163	0.25473	0.522904
F4JUW0	AT4G20380	LSD1	LSD1 zinc finger family protein	PM+ER	UNKNOWN	UNKNOWN	PM	ER	1e-05	0.2582	1e-05	0.86905	0.22747	0.58009	0.08635	0.00213	0.0047	0.02471	0.00905	0.00503	0.03119	0.00658	0.01926	0.00343	0.80756	0.35262	0.522798
Q5XPJ9	AT2G38440	SCAR2	Protein SCAR2	?ER+PM+vacuole+tgn?	UNKNOWN	UNKNOWN	UNKNOWN	UNKNOWN	0.61225	0.61225	0.03887	0.88095	0.33757	0.23777	0.00265	0.01443	0.04686	0.01512	0.00357	0.00497	0.00509	0.10496	0.07405	0.15298	0.57534	0.0998	0.517921
Q84ME1	AT5G19080	LUL3	Probable E3 ubiquitin-protein ligase LUL3	PM+ER	UNKNOWN	UNKNOWN	PM	ER	0	0.05008	0	1	0.23362	0.64248	0.00796	0.00835	0.01168	0.04689	0.00367	0.00467	0.00243	0.00809	0.02197	0.00818	0.8761	0.40886	0.517898
O80517	AT2G44790	O80517	Uclacyanin-2	PM+ER	UNKNOWN	UNKNOWN	PM	ER	0	0.08578	0	1	0.2409	0.67766	0.00315	0.0015	0.00592	0.00609	0.00675	0.00291	0.00775	0.04062	0.00295	0.00381	0.91856	0.43676	0.51737
Q27GI3	AT5G62890	NAT6	Nucleobase-ascorbate transporter 6	?ER+PM+chloroplast	UNKNOWN	UNKNOWN	UNKNOWN	UNKNOWN	0.62159	0.62159	0.09601	1	0.43994	0.22176	0.19354	0.0022	0.00413	0.01544	0.00364	0.00436	0.09266	0.00619	0.01053	0.0056	0.6617	0.21818	0.51733
Q0WRW8	AT3G07570	Q0WRW8	Cytochrome b561 and DOMON domain-containing protein At3g07570	PM+ER	UNKNOWN	UNKNOWN	PM	ER	0	0.16563	0	0.75	0.2379	0.66823	0.007	0.00164	0.00814	0.00481	0.00194	0.0045	0.00592	0.03505	0.01731	0.00756	0.90613	0.43033	0.516195
F4HS17	AT1G73920	F4HS17	Alpha/beta-Hydrolases superfamily protein	?PM+NUCLEUS+ER	UNKNOWN	UNKNOWN	UNKNOWN	UNKNOWN	0.60997	0.60997	0.17496	0.75	0.22917	0.37254	0.01095	0.00421	0.02372	0.02263	0.00651	0.3011	0.00677	0.00771	0.01016	0.00452	0.60171	0.14337	0.515443
Q9LZF1	AT5G03380	HIPP06	Heavy metal-associated isoprenylated plant protein 6	?ER+PM+chloroplast+unknown?+golgi?	UNKNOWN	UNKNOWN	UNKNOWN	UNKNOWN	0.75012	0.75012	0.2359	1	0.25532	0.24856	0.16304	0.00854	0.01099	0.12916	0.00317	0.00742	0.01905	0.00581	0.14193	0.00701	0.50388	0.00676	0.500474
Q944S5	AT3G28670	Q944S5	At3g28670	?NUCLEUS+PM+ER	UNKNOWN	UNKNOWN	UNKNOWN	UNKNOWN	0.57683	0.57683	0.20732	1	0.2362	0.29569	0.01044	0.00489	0.02635	0.00401	0.00472	0.37758	0.02117	0.00446	0.01082	0.00366	0.53189	0.05949	0.500248
F4KFX5	AT5G40000	F4KFX5	AAA-ATPase At5g40000	PM+ER	UNKNOWN	UNKNOWN	PM	ER	0	0.15953	0	0.5119	0.22048	0.65097	0.00878	0.00321	0.01455	0.00415	0.00661	0.00307	0.00903	0.00628	0.02008	0.0528	0.87145	0.43049	0.496299
Q9C533	AT1G69420	PAT22	Probable protein S-acyltransferase 22	PM+ER	UNKNOWN	UNKNOWN	PM	ER	0	0.20874	0	0.70238	0.20647	0.57376	0.0038	0.0153	0.02707	0.02167	0.00524	0.00813	0.00333	0.04405	0.08576	0.00541	0.78023	0.36729	0.493659
A0A1P8AZB0	AT2G13820	XYP2	Bifunctional inhibitor/lipid-transfer protein/seed storage 2S albumin superfamily protein	?PM+ER+extracellular+peroxisome?+unknown?	UNKNOWN	UNKNOWN	UNKNOWN	UNKNOWN	0.73476	0.73476	0.30185	0.5	0.24071	0.26045	0.00876	0.01874	0.19446	0.004	0.00435	0.00628	0.11507	0.0201	0.10242	0.02466	0.50116	0.01974	0.491267
Q9XEE9	AT2G40190	ALG11	GDP-Man:Man(3)GlcNAc(2)-PP-Dol alpha-1,2-mannosyltransferase	ER+PM	UNKNOWN	UNKNOWN	ER	PM	0	0.01847	0	1	0.70921	0.23095	0.0045	0.00167	0.00932	0.00999	0.00223	0.00363	0.00278	0.01824	0.0028	0.00467	0.94016	0.47826	0.490519
Q84XF3	AT3G61760	DRP1B	Phragmoplastin DRP1B	?ER+PM+VACUOLE	UNKNOWN	UNKNOWN	UNKNOWN	UNKNOWN	0.70943	0.70943	0.2948	1	0.27608	0.23316	0.00477	0.09973	0.04211	0.0811	0.00764	0.00437	0.01305	0.0036	0.01235	0.22204	0.50924	0.04292	0.487383
Q9S9V0	AT4G04695	CPK31	Calcium-dependent protein kinase 31	ER+PM	UNKNOWN	UNKNOWN	ER	PM	0	0.10505	0	0.9881	0.70471	0.22385	0.00734	0.00138	0.00476	0.02337	0.00377	0.00468	0.00365	0.01577	0.0038	0.00291	0.92856	0.48086	0.482053
Q9FLT5	AT5G61730	ABCA9	ABC transporter A family member 9	PM+ER	UNKNOWN	UNKNOWN	PM	ER	0	0.01714	0	1	0.21934	0.70204	0.00377	0.00204	0.01035	0.01856	0.00225	0.00456	0.00688	0.01225	0.00608	0.01189	0.92138	0.4827	0.47663
F4KHA2	AT5G40170	RLP54	Receptor-like protein 54	ER+PM	UNKNOWN	UNKNOWN	ER	PM	0	0.12029	0	0.61905	0.6901	0.21484	0.00333	0.00209	0.00428	0.01279	0.00285	0.00251	0.00211	0.04379	0.00506	0.01625	0.90494	0.47526	0.474858
Q9SN68	AT4G19640	RABF2B	Ras-related protein RABF2b	PM+ER	UNKNOWN	ER	PM	ER	0	0.02685	0	1	0.20389	0.64503	0.00324	0.00284	0.02213	0.03002	0.00366	0.00292	0.00327	0.05335	0.00339	0.02627	0.84892	0.44114	0.474427
Q9FJH0	AT5G60860	RABA1F	Ras-related protein RABA1f	?PM+er+cytosol+extracellular?	UNKNOWN	UNKNOWN	UNKNOWN	UNKNOWN	0.48008	0.48008	0.01472	0.86905	0.19155	0.43787	0.0047	0.16729	0.12722	0.01717	0.00841	0.00472	0.00411	0.00915	0.00507	0.02273	0.62942	0.24632	0.474381
Q9LYI4	AT5G11890	EMB3135	Harpin-induced protein	?ER+PEROXISOME+pm	UNKNOWN	UNKNOWN	UNKNOWN	UNKNOWN	0.31117	0.31117	0.01576	0.88095	0.50608	0.18682	0.01111	0.00446	0.00896	0.00483	0.00344	0.00518	0.23028	0.00931	0.0199	0.00962	0.6929	0.31926	0.471685
Q9SLC3	AT2G42360	ATL41	E3 ubiquitin-protein ligase ATL41	?PM+er+extracellular	UNKNOWN	UNKNOWN	UNKNOWN	UNKNOWN	0.14234	0.14234	0.00226	0.79762	0.19065	0.57475	0.00484	0.00887	0.16682	0.00203	0.00439	0.00916	0.00999	0.01225	0.00764	0.00861	0.7654	0.3841	0.47141
Q9XES1	AT1G07670	ECA4	Calcium-transporting ATPase 4, endoplasmic reticulum-type	PM+ER	UNKNOWN	UNKNOWN	PM	ER	0	0.05323	0	1	0.21084	0.68557	0.00476	0.00245	0.01636	0.01821	0.00316	0.02514	0.00253	0.00915	0.00782	0.01401	0.89641	0.47473	0.470857
Q9M1P1	AT3G44630	T18B22.30	ADP-ribosyl cyclase/cyclic ADP-ribose hydrolase	?ER+EXTRACELLULAR+pm	UNKNOWN	UNKNOWN	UNKNOWN	UNKNOWN	0.47609	0.47609	0.04251	1	0.4623	0.18657	0.00717	0.02245	0.25	0.01081	0.00539	0.00735	0.00732	0.00486	0.00705	0.02872	0.64887	0.27573	0.469957
Q9SB81	AT4G21960	PER42	Peroxidase 42	?GOLGI+PM+ER	UNKNOWN	UNKNOWN	UNKNOWN	UNKNOWN	0.51995	0.51995	0.09102	0.96429	0.2167	0.28975	0.014	0.00327	0.00624	0.41212	0.00697	0.00716	0.00348	0.01996	0.01338	0.00698	0.50645	0.07305	0.469454
Q9SRN0	AT3G11660	NHL1	NDR1/HIN1-like protein 1	ER+pm+chloroplast?	UNKNOWN	UNKNOWN	ER	PM	0.00032	0.14781	0.00032	1	0.57924	0.18634	0.14388	0.00184	0.00357	0.04786	0.00399	0.00383	0.00712	0.00464	0.01267	0.00503	0.76558	0.3929	0.464784
Q9FJI1	AT5G60340	AAK6	Adenylate kinase isoenzyme 6 homolog	?PEROXISOME+PM+ER+unknown?	UNKNOWN	UNKNOWN	UNKNOWN	UNKNOWN	0.70701	0.70701	0.37845	0.5	0.22509	0.24933	0.00665	0.00264	0.01396	0.00597	0.00204	0.04282	0.27667	0.03252	0.13512	0.00718	0.47442	0.02424	0.46292
A0A1I9LPJ2	AT3G43810	CAM7	Calmodulin 7	?ER+UNKNOWN+pm	UNKNOWN	UNKNOWN	UNKNOWN	UNKNOWN	0.60576	0.60576	0.12034	0.5	0.41832	0.18446	0.01236	0.00544	0.01629	0.00929	0.00222	0.01785	0.04827	0.01818	0.26	0.00733	0.60278	0.23386	0.461814
Q9FM08	AT5G62865	Q9FM08	Uncharacterized protein At5g62860/MQB2_160	?ER+UNKNOWN+pm	UNKNOWN	UNKNOWN	UNKNOWN	UNKNOWN	0.5674	0.5674	0.05427	0.63095	0.36113	0.19319	0.00934	0.00966	0.01649	0.07071	0.00364	0.00615	0.00748	0.01619	0.27103	0.03499	0.55432	0.16794	0.461227
Q8S926	AT2G45170	ATG8E	Autophagy-related protein 8e	?PM+er+golgi+tgn?	UNKNOWN	VACUOLE	UNKNOWN	UNKNOWN	0.33232	0.33232	0.01956	0.60714	0.17941	0.46042	0.00492	0.005	0.01512	0.17895	0.00646	0.00514	0.00418	0.12852	0.00473	0.00716	0.63983	0.28101	0.460031
Q9LV79	AT5G64990	RABH1A	Ras-related protein RABH1a	?PM+EXTRACELLULAR+ER+cytosol	UNKNOWN	UNKNOWN	UNKNOWN	UNKNOWN	0.75427	0.75427	0.41944	1	0.21749	0.26056	0.00521	0.17605	0.21859	0.00878	0.00812	0.00491	0.04368	0.00704	0.01369	0.03589	0.47805	0.04307	0.45746
Q9SUK6	AT4G16790	dl4420c	AT4g16790/dl4420c	PM+er+golgi?	UNKNOWN	UNKNOWN	PM	ER	0	0.01394	0	1	0.18732	0.62692	0.00709	0.00327	0.00896	0.12838	0.00693	0.00504	0.00291	0.0088	0.00333	0.01105	0.81424	0.4396	0.4563
Q9FFC9	AT5G16550	LDIP	Voltage-dependent L-type calcium channel subunit	ER+PM	UNKNOWN	UNKNOWN	ER	PM	0	0.0352	0	1	0.71386	0.20822	0.00371	0.00715	0.02001	0.01453	0.00302	0.00992	0.00237	0.0087	0.0037	0.00481	0.92208	0.50564	0.455839
Q01474	AT1G56330	SAR1B	Small COPII coat GTPase SAR1B	PM+er+vacuole?	UNKNOWN	UNKNOWN	PM	ER	5e-05	0.19358	5e-05	1	0.1776	0.55892	0.00283	0.05557	0.01942	0.05347	0.00626	0.00444	0.0039	0.00393	0.00979	0.10386	0.73652	0.38132	0.45567
Q9C6B8	AT1G73590	PIN1	Auxin efflux carrier component 1	?PM+TGN+er	UNKNOWN	UNKNOWN	UNKNOWN	UNKNOWN	0.5424	0.5424	0.00107	1	0.18025	0.39282	0.00303	0.00374	0.02207	0.02325	0.00379	0.00341	0.00519	0.33133	0.00428	0.02683	0.57307	0.21257	0.451253
Q8RWE9	AT5G49990	NAT5	Nucleobase-ascorbate transporter 5	?CHLOROPLAST+PM+ER	UNKNOWN	UNKNOWN	UNKNOWN	UNKNOWN	0.44333	0.44333	0.0397	0.61905	0.2083	0.27223	0.45181	0.00211	0.00591	0.00359	0.00198	0.00397	0.03713	0.00413	0.0043	0.00454	0.48053	0.06393	0.44981
Q4FE47	AT3G23280	XBAT35	Putative E3 ubiquitin-protein ligase XBAT35	?PEROXISOME+PM+ER	UNKNOWN	UNKNOWN	UNKNOWN	UNKNOWN	0.57685	0.57685	0.07209	1	0.20835	0.27136	0.0044	0.01653	0.01695	0.01454	0.00524	0.00675	0.3436	0.00653	0.02837	0.07738	0.47971	0.06301	0.449483
O64621	AT2G18910	O64621	Expressed protein	?PM+VACUOLE+ER+unknown?	UNKNOWN	UNKNOWN	UNKNOWN	UNKNOWN	0.69787	0.69787	0.19213	0.64286	0.20086	0.28649	0.00347	0.08129	0.04823	0.03255	0.00609	0.0048	0.00443	0.00867	0.11179	0.21134	0.48735	0.08563	0.445618
Q9SVG4	AT4G20830	Q9SVG4	Berberine bridge enzyme-like 19	?EXTRACELLULAR+ER+PM	UNKNOWN	UNKNOWN	UNKNOWN	UNKNOWN	0.54378	0.54378	0.07742	1	0.26769	0.20675	0.0065	0.04751	0.37326	0.00534	0.00842	0.0555	0.00826	0.00658	0.00597	0.00821	0.47444	0.06094	0.445528
F4I543	AT1G56423	F4I543	Uncharacterized protein	?ER+pm+golgi	UNKNOWN	ER	UNKNOWN	UNKNOWN	0.26301	0.26301	0.00128	0.60714	0.59325	0.17365	0.01638	0.00227	0.00553	0.166	0.00532	0.00645	0.00276	0.01328	0.01008	0.00504	0.7669	0.4196	0.445109
Q9CAC4	AT1G70750	MYOB2	Myosin-binding protein 2	ER+pm	UNKNOWN	UNKNOWN	ER	PM	0	0.03196	0	0.86905	0.67281	0.18857	0.00631	0.00411	0.03084	0.00455	0.00264	0.06169	0.00568	0.01062	0.00884	0.00335	0.86138	0.48424	0.444265
Q9FXI9	AT1G19940	Q9FXI9	Endoglucanase 2	?PM+NUCLEUS+er	UNKNOWN	UNKNOWN	UNKNOWN	UNKNOWN	0.56936	0.56936	0.00509	0.88095	0.17648	0.37355	0.01214	0.00306	0.01441	0.00185	0.00325	0.33273	0.04334	0.01079	0.02485	0.00355	0.55003	0.19707	0.441636
Q94AU2	AT1G11890	SEC221	25.3 kDa vesicle transport protein SEC22-1	ER+pm+extracellular?	ER	ER	ER	PM	0	0.03339	0	1	0.61566	0.1741	0.00577	0.04143	0.10363	0.00896	0.00521	0.01689	0.00594	0.00452	0.00735	0.01053	0.78976	0.44156	0.441034
Q0WPE9	AT1G60030	NAT7	Nucleobase-ascorbate transporter 7	?CHLOROPLAST+ER+PM	UNKNOWN	UNKNOWN	UNKNOWN	UNKNOWN	0.39082	0.39082	0.04969	1	0.25982	0.20581	0.49102	0.0012	0.00318	0.0136	0.00205	0.00274	0.00709	0.00215	0.00693	0.00443	0.46563	0.05401	0.440481
Q2EF88	AT5G53550	YSL3	Metal-nicotianamine transporter YSL3	ER+pm+golgi?	UNKNOWN	UNKNOWN	ER	PM	1e-05	0.03183	1e-05	1	0.59786	0.17015	0.00593	0.00267	0.01132	0.1288	0.00409	0.00468	0.00298	0.06031	0.00444	0.00676	0.76801	0.42771	0.439524
Q9LSK9	AT5G65660	Q9LSK9	Uncharacterized protein At5g65660	ER+pm	UNKNOWN	UNKNOWN	ER	PM	0	0.0069	0	1	0.65426	0.17839	0.00348	0.00219	0.01275	0.02892	0.00297	0.00266	0.00273	0.08693	0.00293	0.02179	0.83265	0.47587	0.436417
O22476	AT4G39400	BRI1	Protein BRASSINOSTEROID INSENSITIVE 1	PM+er	UNKNOWN	PM	PM	ER	0	0.01271	0	1	0.18176	0.68263	0.00619	0.00303	0.02257	0.00735	0.00242	0.03245	0.01143	0.00669	0.03914	0.00436	0.86439	0.50087	0.431443
Q9M1C9	AT3G60140	BGLU30	Beta-glucosidase 30	?GOLGI+ER+pm	UNKNOWN	UNKNOWN	UNKNOWN	UNKNOWN	0.45872	0.45872	0.06563	0.7381	0.25883	0.19901	0.01604	0.00273	0.00504	0.43693	0.009	0.00718	0.0031	0.02425	0.03043	0.00746	0.45784	0.05982	0.430452
F4HRY1	AT1G73650	F4HRY1	3-oxo-5-alpha-steroid 4-dehydrogenase	PM+er	UNKNOWN	UNKNOWN	PM	ER	0	0.0097	0	1	0.18049	0.68826	0.00311	0.00191	0.01299	0.03052	0.00431	0.00296	0.0035	0.03542	0.00211	0.03442	0.86875	0.50777	0.427625
Q9FNH6	AT5G06320	NHL3	NDR1/HIN1-like protein 3	PM+er	UNKNOWN	UNKNOWN	PM	ER	0	0.00124	0	1	0.18409	0.70466	0.0067	0.0014	0.00909	0.04666	0.00342	0.00307	0.004	0.02319	0.00354	0.01018	0.88875	0.52057	0.426093
Q9LFT9	AT5G10260	RABH1E	Ras-related protein RABH1e	?EXTRACELLULAR+ER+PM+cytosol?	UNKNOWN	UNKNOWN	UNKNOWN	UNKNOWN	0.69365	0.69365	0.30455	1	0.222	0.20871	0.00552	0.10631	0.28367	0.00378	0.00589	0.02809	0.01538	0.01261	0.09987	0.00818	0.43071	0.01329	0.424986
Q8L7M7	AT1G17820	Q8L7M7	At1g17820	?ER+pm+extracellular?+vacuole?	UNKNOWN	UNKNOWN	UNKNOWN	UNKNOWN	0.40471	0.40471	0.01121	0.92857	0.40013	0.15927	0.00639	0.08914	0.14921	0.03709	0.00718	0.00487	0.00451	0.00652	0.00985	0.12581	0.5594	0.24086	0.424663
Q8LPT2	AT1G10410	Q8LPT2	At1g10410/F14N23_31	PM+er	UNKNOWN	UNKNOWN	PM	ER	0	0.00902	0	0.86905	0.18669	0.71774	0.00344	0.00561	0.01924	0.01213	0.00291	0.00957	0.00223	0.00551	0.01193	0.02302	0.90443	0.53105	0.424132
Q7DMA9	AT3G54010	PAS1	Peptidyl-prolyl cis-trans isomerase PASTICCINO1	?PM+er+cytosol?+extracellular?	UNKNOWN	UNKNOWN	UNKNOWN	UNKNOWN	0.10918	0.10918	0.00582	1	0.15159	0.53901	0.00505	0.12843	0.1266	0.01006	0.0076	0.00733	0.00577	0.0073	0.00463	0.00664	0.6906	0.38742	0.423048
A0A178VGH9	AT3G19460	A0A178VGH9	Reticulon-like protein	ER+pm	UNKNOWN	UNKNOWN	ER	PM	0	0.00371	0	1	0.72813	0.18924	0.00538	0.00257	0.0053	0.03785	0.00381	0.00368	0.00233	0.01146	0.00255	0.0077	0.91737	0.53889	0.423008
F4IFF4	AT2G14060	F4IFF4	S-adenosyl-L-methionine-dependent methyltransferases superfamily protein	PM+er	UNKNOWN	UNKNOWN	PM	ER	0	0.02981	0	0.63095	0.16803	0.65608	0.00251	0.01487	0.03229	0.05419	0.00467	0.00649	0.00188	0.0158	0.00387	0.03934	0.82411	0.48805	0.421903
Q9ZQ71	AT2G03350	Q9ZQ71	At2g03350	?PM+CYTOSOL+EXTRACELLULAR+er	UNKNOWN	UNKNOWN	UNKNOWN	UNKNOWN	0.72616	0.72616	0.33011	1	0.18611	0.27505	0.00547	0.22019	0.20954	0.00952	0.00901	0.00575	0.00712	0.00645	0.00628	0.05951	0.46116	0.08894	0.420144
A0A1P8AS52	AT1G01490	A0A1P8AS52	Heavy metal transport/detoxification superfamily protein	PM+GOLGI+er?	UNKNOWN	UNKNOWN	PM	GOLGI	0.0005	0.52559	0.0005	0.61905	0.145	0.43899	0.00903	0.00489	0.00863	0.33363	0.00672	0.01067	0.00302	0.01738	0.01407	0.00797	0.58399	0.29399	0.412303
Q9C568	AT5G22200	Q9C568	Late embryogenesis abundant	PM+CHLOROPLAST+er?	UNKNOWN	UNKNOWN	PM	CHLOROPLAST	0.0009	0.40434	0.0009	1	0.14173	0.48132	0.28549	0.00306	0.00633	0.01746	0.00247	0.00472	0.02422	0.00339	0.02531	0.00451	0.62305	0.33959	0.411468
Q3EDL4	AT1G01540	Q3EDL4	Probable serine/threonine-protein kinase At1g01540	PM+er	UNKNOWN	PM	PM	ER	1e-05	0.02952	1e-05	0.88095	0.15521	0.63555	0.01287	0.00251	0.00845	0.01919	0.00405	0.00395	0.02734	0.00373	0.0276	0.09955	0.79076	0.48034	0.410926
Q8L7Q7	AT5G64640	PME64	Probable pectinesterase/pectinesterase inhibitor 64 [Includes: Pectinesterase inhibitor 64	?PM+TGN+er	UNKNOWN	UNKNOWN	UNKNOWN	UNKNOWN	0.6148	0.6148	0.00594	1	0.15626	0.35751	0.00235	0.00909	0.01851	0.07377	0.00341	0.00485	0.00544	0.35008	0.01239	0.00633	0.51377	0.20125	0.410374
Q93ZM0	AT3G18370	ATSYTF	AT3g18370/MYF24_8	PM+er	UNKNOWN	UNKNOWN	PM	ER	0	0.00384	0	1	0.17973	0.72931	0.00834	0.00151	0.00941	0.04364	0.00441	0.00422	0.00407	0.00699	0.00401	0.00436	0.90904	0.54958	0.40945
Q8VY21	AT2G47900	TULP3	Tubby-like F-box protein 3	PEROXISOME+PM+er	UNKNOWN	UNKNOWN	PEROXISOME	PM	0.00017	0.54568	0.00017	0.88095	0.1504	0.36774	0.00882	0.00451	0.00859	0.00265	0.00492	0.0056	0.37586	0.00866	0.03551	0.02675	0.51814	0.21734	0.405527
Q9C508	AT1G57990	PUP18	Probable purine permease 18	PM+er	UNKNOWN	UNKNOWN	PM	ER	0	0.00261	0	1	0.17611	0.73003	0.00423	0.00137	0.0082	0.02094	0.00402	0.0035	0.00418	0.04055	0.00281	0.00405	0.90614	0.55392	0.404211
Q8VXX9	AT4G14600	Q8VXX9	Bet1-like protein At4g14600	ER+pm?	UNKNOWN	UNKNOWN	ER	PM	1e-05	0.01447	1e-05	1	0.61365	0.14471	0.00408	0.00543	0.02314	0.08708	0.00477	0.00337	0.0022	0.02163	0.0022	0.08772	0.75836	0.46894	0.402735
Q8LPK0	AT3G47790	ABCA8	ABC transporter A family member 8	PM+er	UNKNOWN	UNKNOWN	PM	ER	0	0.01247	0	0.5	0.17385	0.73054	0.00554	0.00136	0.01197	0.03354	0.00432	0.00389	0.00275	0.02436	0.00327	0.00462	0.90439	0.55669	0.400925
Q9LF03	AT5G16250	Q9LF03	Transmembrane protein	?PM+UNKNOWN+er+vacuole?	UNKNOWN	UNKNOWN	UNKNOWN	UNKNOWN	0.71571	0.71571	0.28182	0.7619	0.18236	0.24373	0.01618	0.0073	0.04863	0.02077	0.00305	0.00411	0.06781	0.02276	0.24167	0.14164	0.42609	0.06137	0.399941
Q8RWL6	AT4G35780	STY17	Serine/threonine-protein kinase STY17	?PM+VACUOLE+er?	UNKNOWN	UNKNOWN	UNKNOWN	UNKNOWN	0.64362	0.64362	0.00845	0.5	0.13279	0.47507	0.00528	0.00293	0.01191	0.02087	0.01148	0.00549	0.02565	0.00445	0.04345	0.26063	0.60786	0.34228	0.399802
Q9FYF7	AT1G67360	Q9FYF7	REF/SRPP-like protein At1g67360	?ER+VACUOLE+pm?	UNKNOWN	UNKNOWN	UNKNOWN	UNKNOWN	0.3496	0.3496	0.00412	1	0.48051	0.13138	0.00521	0.04555	0.04389	0.03182	0.00669	0.00449	0.00455	0.00402	0.01758	0.22431	0.61189	0.34913	0.398261
Q6NPQ1	AT5G18680	TULP11	Tubby-like F-box protein 11	PM+er	UNKNOWN	UNKNOWN	PM	ER	0	0.01528	0	0.88095	0.15825	0.69077	0.00397	0.00244	0.00653	0.01811	0.00452	0.00409	0.00549	0.00462	0.01134	0.08988	0.84902	0.53252	0.3969
Q9SUR3	AT4G23630	RTNLB1	Reticulon-like protein B1	ER+pm	UNKNOWN	UNKNOWN	ER	UNKNOWN	0.00056	0.00056	0	1	0.75582	0.17985	0.00458	0.00179	0.0048	0.01976	0.00318	0.00304	0.00239	0.01557	0.00209	0.00713	0.93567	0.57597	0.396752
Q84TE2	AT4G33120	Q84TE2	At4g33120	?ER+pm?	UNKNOWN	UNKNOWN	UNKNOWN	UNKNOWN	0.15995	0.15995	0.00293	0.63095	0.56606	0.13294	0.00409	0.00812	0.08438	0.00506	0.00248	0.03806	0.01178	0.02328	0.09791	0.02583	0.699	0.43312	0.396249
P59277	AT1G51740	SYP81	Syntaxin-81	?PM+EXTRACELLULAR+er?+unknown?	UNKNOWN	ER	UNKNOWN	UNKNOWN	0.51921	0.51921	0.167	1	0.14608	0.35273	0.00629	0.08337	0.22288	0.01231	0.00509	0.0159	0.00581	0.00739	0.13252	0.00963	0.49881	0.20665	0.395731
Q93XX4	AT1G53590	NTMC2T6.1	C2 domain-containing protein At1g53590	ER+pm	UNKNOWN	UNKNOWN	ER	PM	0	0.00123	0	1	0.76545	0.18252	0.00521	0.00185	0.00476	0.01226	0.00309	0.00312	0.0033	0.00565	0.00307	0.00972	0.94797	0.58293	0.39537
Q8L778	AT5G09870	CESA5	Cellulose synthase A catalytic subunit 5 [UDP-forming]	ER+pm?+extracellular?	UNKNOWN	UNKNOWN	ER	PM	0.00052	0.04483	0.00052	1	0.5778	0.13326	0.00373	0.00636	0.10095	0.03911	0.00423	0.00267	0.0037	0.09037	0.00265	0.03516	0.71106	0.44454	0.394965
Q9M2R0	AT3G57880	FTIP3	FT-interacting protein 3	?ER+golgi+pm?+chloroplast?	UNKNOWN	EXTRACELLULAR	UNKNOWN	UNKNOWN	0.45645	0.45645	0.01953	1	0.49991	0.12792	0.11704	0.00264	0.00347	0.18534	0.00626	0.00479	0.00648	0.00727	0.0346	0.00427	0.62783	0.37199	0.394284
Q9FGY8	AT5G49580	Q9FGY8	Chaperone DnaJ-domain superfamily protein	PM+er	UNKNOWN	UNKNOWN	PM	ER	0	0.00762	0	1	0.15299	0.68075	0.00464	0.01815	0.06498	0.03825	0.00551	0.01413	0.00391	0.00623	0.00748	0.00299	0.83374	0.52776	0.393725
Q8GXN6	AT5G63880	VPS20.1	Vacuolar protein sorting-associated protein 20 homolog 1	?ER+VACUOLE+pm?	UNKNOWN	UNKNOWN	UNKNOWN	UNKNOWN	0.43068	0.43068	0.00147	0.5119	0.45515	0.12849	0.00521	0.00403	0.00376	0.0336	0.01865	0.00301	0.00994	0.00595	0.01776	0.31444	0.58364	0.32666	0.392988
Q8LG70	AT3G49360	PGL2	Probable 6-phosphogluconolactonase 2	PM+PEROXISOME+er?	UNKNOWN	UNKNOWN	PM	PEROXISOME	0.00026	0.43165	0.00026	1	0.12682	0.48234	0.01167	0.0055	0.00726	0.00202	0.00409	0.00431	0.32369	0.01293	0.00887	0.0105	0.60916	0.35552	0.392591
Q9SII6	AT2G17220	PIX13	Probable serine/threonine-protein kinase PIX13	?VACUOLE+ER+pm	UNKNOWN	UNKNOWN	UNKNOWN	UNKNOWN	0.26894	0.26894	0.06174	0.72619	0.20156	0.19357	0.00388	0.0038	0.02529	0.02953	0.00446	0.00958	0.00552	0.00751	0.0184	0.4969	0.39513	0.00799	0.391973
Q9FJU9	AT5G56590	Q9FJU9	Glucan endo-1,3-beta-glucosidase 13	?EXTRACELLULAR+ER+pm+cytosol	UNKNOWN	UNKNOWN	UNKNOWN	UNKNOWN	0.67084	0.67084	0.01049	1	0.25151	0.17347	0.00645	0.1566	0.30346	0.00475	0.00774	0.00742	0.0063	0.01032	0.03735	0.03464	0.42498	0.07804	0.391815
Q9LM69	AT1G20823	ATL80	RING-H2 finger protein ATL80	?PM+extracellular+er?+tgn?	UNKNOWN	UNKNOWN	UNKNOWN	UNKNOWN	0.46714	0.46714	0.05778	0.92857	0.12831	0.44185	0.00415	0.01405	0.19355	0.03138	0.00517	0.00354	0.0054	0.11633	0.00279	0.05348	0.57016	0.31354	0.391392
Q9SPE6	AT3G56190	ASNAP2	Alpha-soluble NSF attachment protein 2	PM+er?+extracellular?	UNKNOWN	UNKNOWN	PM	ER	1e-05	0.04077	1e-05	1	0.12914	0.57097	0.00264	0.07131	0.10605	0.01101	0.00521	0.00638	0.00753	0.08215	0.00383	0.00378	0.70011	0.44183	0.39078
Q9ZNT3	AT2G16700	ADF5	Actin-depolymerizing factor 5	PM+extracellular?+er?+vacuole?	UNKNOWN	UNKNOWN	PM	EXTRACELLULAR	0.00072	0.08089	0.00072	0.86905	0.12529	0.52909	0.00444	0.02534	0.1372	0.0097	0.00406	0.03336	0.00535	0.00451	0.0135	0.10815	0.65438	0.4038	0.390141
O03983	AT1G01470	LEA14	Probable desiccation-related protein LEA14	?CYTOSOL+EXTRACELLULAR+PM+er	UNKNOWN	UNKNOWN	UNKNOWN	UNKNOWN	0.71244	0.71244	0.33176	0.95238	0.18256	0.22341	0.00623	0.28389	0.23211	0.01773	0.00971	0.00475	0.00569	0.01337	0.00455	0.016	0.40597	0.04085	0.389386
Q39222	AT1G16920	RABA1B	Ras-related protein RABA1b	PM+er?	UNKNOWN	UNKNOWN	PM	ER	0	0.00499	0	1	0.14281	0.66428	0.00306	0.06742	0.05399	0.026	0.00614	0.00415	0.00384	0.01704	0.00459	0.00667	0.80709	0.52147	0.386217
B3H460	AT3G49645	B3H460	FAD-binding protein	?CYTOSOL+ER+pm+extracellular	UNKNOWN	UNKNOWN	UNKNOWN	UNKNOWN	0.68195	0.68195	0.21863	0.63095	0.24279	0.17223	0.00565	0.30921	0.16523	0.00807	0.0102	0.00635	0.03218	0.00642	0.01977	0.02192	0.41502	0.07056	0.385736
B3H5W7	AT5G06750	APD8	Protein phosphatase 2C family protein	PM+er	UNKNOWN	UNKNOWN	PM	ER	0	0.01211	0	1	0.15388	0.70592	0.00564	0.00738	0.05409	0.00331	0.00331	0.00548	0.02189	0.00298	0.01082	0.0253	0.8598	0.55204	0.385156
Q9XFM6	AT5G52240	MSBP1	Membrane steroid-binding protein 1	ER+pm	UNKNOWN	ER	ER	PM	0	0.00268	0	0.61905	0.75822	0.17131	0.00463	0.00179	0.01034	0.02245	0.00315	0.00254	0.00223	0.01423	0.00234	0.00677	0.92953	0.58691	0.38398
Q9FY89	AT5G09260	VPS20.2	Vacuolar protein sorting-associated protein 20 homolog 2	PM+er	UNKNOWN	UNKNOWN	PM	ER	0	0.0012	0	1	0.15066	0.70006	0.00568	0.00206	0.00725	0.07325	0.00623	0.00314	0.00337	0.00587	0.00274	0.03966	0.85072	0.5494	0.383334
Q9FFK8	AT5G05660	NFXL2	NF-X1-type zinc finger protein NFXL2	?ER+golgi+pm?	UNKNOWN	UNKNOWN	UNKNOWN	UNKNOWN	0.156	0.156	0.00331	1	0.45053	0.12047	0.00983	0.09295	0.08122	0.15368	0.00633	0.01692	0.00318	0.00549	0.04691	0.01248	0.571	0.33006	0.382536
Q9M0A0	AT4G30600	Q9M0A0	AT4g30600/F17I23_60	?ER+EXTRACELLULAR+cytosol?+pm?	UNKNOWN	UNKNOWN	UNKNOWN	UNKNOWN	0.35833	0.35833	0.00115	1	0.42685	0.12265	0.00714	0.12834	0.25043	0.01175	0.00868	0.01235	0.0064	0.00572	0.00706	0.01262	0.5495	0.3042	0.382342
Q9LTM2	AT3G26190	CYP71B21	Cytochrome P450 71B21	?ER+golgi+pm?	UNKNOWN	UNKNOWN	UNKNOWN	UNKNOWN	0.14428	0.14428	0.0095	1	0.64175	0.13402	0.00947	0.00278	0.00523	0.16036	0.0045	0.00754	0.00204	0.01189	0.01348	0.00694	0.77577	0.50773	0.381888
Q9M221	AT3G60380	T8B10_40	Cotton fiber protein	PM+er?	UNKNOWN	UNKNOWN	PM	ER	0	0.00157	0	0.85714	0.13326	0.6407	0.06034	0.00267	0.0098	0.0568	0.00427	0.01271	0.00339	0.00666	0.06576	0.00364	0.77396	0.50744	0.381222
Q9LYP1	AT5G07250	RBL3	RHOMBOID-like protein 3	PM+peroxisome+er?	UNKNOWN	UNKNOWN	PM	PEROXISOME	0	0.00614	0	1	0.12944	0.64187	0.01022	0.00324	0.00862	0.00843	0.00753	0.00617	0.1631	0.0063	0.00782	0.00728	0.77131	0.51243	0.376068
Q8GYI7	AT5G19630	Q8GYI7	Alpha/beta-Hydrolases superfamily protein	?VACUOLE+er+pm+golgi?	UNKNOWN	UNKNOWN	UNKNOWN	UNKNOWN	0.36265	0.36265	0.12261	1	0.1902	0.18592	0.0047	0.0194	0.02871	0.10673	0.00586	0.00374	0.00361	0.00423	0.00416	0.44275	0.37612	0.00428	0.37451
F4I1M5	AT1G36380	F4I1M5	Transmembrane protein	ER+GOLGI+pm?	UNKNOWN	UNKNOWN	ER	GOLGI	0.00038	0.33667	0.00038	0.61905	0.57762	0.11674	0.00914	0.0038	0.00491	0.22281	0.00565	0.0075	0.00215	0.01253	0.02809	0.00906	0.69436	0.46088	0.374343
F4I596	AT1G64090	RTNLB3	Reticulon-like protein	ER+pm	UNKNOWN	UNKNOWN	ER	UNKNOWN	8e-05	8e-05	0	0.60714	0.74797	0.15983	0.00441	0.00168	0.00753	0.02182	0.00275	0.00267	0.00212	0.03968	0.00224	0.00729	0.9078	0.58814	0.373887
Q9XIE6	AT1G59820	ALA3	Phospholipid-transporting ATPase 3	PM+TGN+er?	UNKNOWN	UNKNOWN	PM	TGN	0	0.47879	0	1	0.11391	0.43086	0.00232	0.00492	0.01729	0.03774	0.00403	0.00343	0.0049	0.3566	0.00352	0.02047	0.54477	0.31695	0.372105
Q9ZVD2	AT2G27080	NHL13	NDR1/HIN1-like protein 13	PM+er?	UNKNOWN	UNKNOWN	PM	UNKNOWN	0.00067	0.00067	0	1	0.14628	0.71359	0.00484	0.00203	0.01302	0.07507	0.00485	0.00312	0.00276	0.01122	0.00231	0.02091	0.85987	0.56731	0.372057
A0A1P8BH10	AT5G50130	MPF21.15	NAD(P)-binding Rossmann-fold superfamily protein	?MITOCHONDRION+pm+er+unknown?	UNKNOWN	UNKNOWN	UNKNOWN	UNKNOWN	0.51775	0.51775	0.1656	0.5	0.18183	0.19075	0.00647	0.00895	0.00475	0.00912	0.41105	0.00499	0.03879	0.00708	0.11846	0.01775	0.37258	0.00892	0.369257
Q8LF21	AT1G14830	DRP1C	Phragmoplastin DRP1C	PM+er?	UNKNOWN	UNKNOWN	PM	UNKNOWN	0.00042	0.00042	0	1	0.13312	0.67917	0.00395	0.00777	0.02388	0.05556	0.0051	0.00438	0.00267	0.00332	0.00326	0.07781	0.81229	0.54605	0.368739
Q93ZS4	AT1G60800	NIK3	Protein NSP-INTERACTING KINASE 3	PM+er?	UNKNOWN	UNKNOWN	PM	ER	0	0.0061	0	0.7381	0.13305	0.68113	0.00438	0.00516	0.04214	0.01689	0.0037	0.07711	0.00341	0.01208	0.01561	0.00534	0.81418	0.54808	0.367944
Q8RY66	AT4G25835	Q8RY66	AAA-ATPase At4g25835	ER+pm	UNKNOWN	UNKNOWN	ER	PM	0	0.01653	0	0.9881	0.75786	0.15873	0.00642	0.00258	0.00528	0.03875	0.00373	0.00653	0.00236	0.00747	0.00548	0.00481	0.91659	0.59913	0.367433
A8MS42	AT4G38670	A8MS42	Pathogenesis-related thaumatin superfamily protein	ER+pm?	UNKNOWN	UNKNOWN	ER	UNKNOWN	0.0006	0.0006	0	1	0.73316	0.14879	0.00212	0.00544	0.01663	0.01097	0.00209	0.00275	0.00382	0.0425	0.00397	0.02776	0.88195	0.58437	0.366565
Q9SK27	AT2G25060	ENODL14	Early nodulin-like protein 14	?CYTOSOL+PM+er+extracellular?	UNKNOWN	UNKNOWN	UNKNOWN	UNKNOWN	0.48593	0.48593	0.05974	0.75	0.16324	0.22492	0.0039	0.40593	0.10536	0.01519	0.00609	0.01113	0.00994	0.00737	0.03593	0.01101	0.38816	0.06168	0.364218
Q9C8Y1	AT1G66400	CML23	Probable calcium-binding protein CML23	PM+er?+vacuole?	UNKNOWN	UNKNOWN	PM	ER	0	0.02136	0	0.64286	0.13007	0.68328	0.00337	0.0068	0.02463	0.00457	0.00493	0.00373	0.01476	0.00378	0.00888	0.1112	0.81335	0.55321	0.363397
Q9SKA3	AT1G22610	MCTP6	Multiple C2 domain and transmembrane region protein 6	?ER+CHLOROPLAST+pm?	UNKNOWN	EXTRACELLULAR	UNKNOWN	UNKNOWN	0.61451	0.61451	0.01607	1	0.41616	0.10594	0.36311	0.00259	0.00461	0.01599	0.0024	0.00493	0.06665	0.00527	0.00931	0.00304	0.5221	0.31022	0.360134
Q944G5	AT3G47960	NPF2.10	Protein NRT1/ PTR FAMILY 2.10	PM+GOLGI+er?	UNKNOWN	UNKNOWN	PM	GOLGI	0	0.42804	0	1	0.10019	0.47162	0.00779	0.0035	0.0078	0.35821	0.00851	0.00375	0.00315	0.0109	0.00341	0.02117	0.57181	0.37143	0.359423
F4KIJ2	AT5G24810	F4KIJ2	ABC1 family protein	ER+TGN+pm?	UNKNOWN	UNKNOWN	ER	TGN	0	0.12914	0	1	0.57391	0.1021	0.00288	0.00224	0.01587	0.02217	0.00282	0.00318	0.00365	0.26218	0.00323	0.00579	0.67601	0.47181	0.357062
Q944K3	AT5G26040	HDA2	Histone deacetylase 2	ER+pm?	UNKNOWN	UNKNOWN	ER	UNKNOWN	4e-05	4e-05	0	1	0.72435	0.1376	0.00425	0.02289	0.02176	0.02753	0.00441	0.00448	0.00348	0.00354	0.00543	0.0403	0.86195	0.58675	0.356201
Q8W4P9	AT3G28430	TT9	Protein TRANSPARENT TESTA 9	?ER+cytosol+extracellular?+pm?	UNKNOWN	UNKNOWN	UNKNOWN	UNKNOWN	0.33994	0.33994	0.04692	1	0.4186	0.10066	0.00478	0.15572	0.14584	0.02081	0.00863	0.00551	0.01511	0.00604	0.02899	0.08931	0.51926	0.31794	0.354166
Q9ZPR4	AT2G03620	MRS2-5	Magnesium transporter MRS2-5	ER+VACUOLE	UNKNOWN	UNKNOWN	ER	VACUOLE	0	0.47724	0	0.9881	0.41373	0.09916	0.00417	0.01613	0.01529	0.04238	0.00633	0.00425	0.01662	0.00469	0.02881	0.34845	0.51289	0.31457	0.35155
Q9SFU6	AT3G07160	CALS9	Callose synthase 9	TGN+PM+er?	UNKNOWN	UNKNOWN	TGN	PM	0	0.33466	0	1	0.12086	0.31467	0.00243	0.0034	0.00829	0.02359	0.00401	0.00384	0.00509	0.49831	0.00419	0.01131	0.43553	0.19381	0.35112
Q6NKR2	AT5G56610	PTPMT2	Phosphatidylglycerophosphate phosphatase PTPMT2	PM+er?	UNKNOWN	UNKNOWN	PM	UNKNOWN	0.0003	0.0003	0	0.86905	0.11529	0.66912	0.00493	0.01863	0.03045	0.00398	0.00673	0.00458	0.01315	0.00364	0.07993	0.04957	0.78441	0.55383	0.34998
A0A1P8B9B2	AT4G16380	A0A1P8B9B2	Heavy metal transport/detoxification superfamily protein	?CHLOROPLAST+ER+pm?	UNKNOWN	UNKNOWN	UNKNOWN	UNKNOWN	0.40296	0.40296	0.00132	1	0.30794	0.12186	0.45709	0.00218	0.00519	0.01432	0.00221	0.00489	0.06852	0.00544	0.00663	0.00375	0.4298	0.18608	0.349823
Q9SCV8	AT5G56870	BGAL4	Beta-galactosidase 4	?GOLGI+ER+pm?	UNKNOWN	UNKNOWN	UNKNOWN	UNKNOWN	0.51017	0.51017	0.00754	0.69048	0.27695	0.13202	0.01218	0.00332	0.00711	0.40805	0.00535	0.02538	0.00321	0.04618	0.07508	0.00518	0.40897	0.14493	0.349698
Q38890	AT5G49720	KOR	Endoglucanase 25	TGN+ER+pm	UNKNOWN	UNKNOWN	TGN	ER	0.0001	0.06936	0.0001	1	0.21132	0.15796	0.00229	0.00244	0.01037	0.01206	0.00255	0.00354	0.00515	0.57945	0.00608	0.00679	0.36928	0.05336	0.349575
Q9CAL7	AT1G70470	Q9CAL7	At1g70470	?UNKNOWN+ER+mitochondrion+pm	UNKNOWN	UNKNOWN	UNKNOWN	UNKNOWN	0.72711	0.72711	0.26466	0.71429	0.22116	0.15108	0.00955	0.0072	0.00465	0.04318	0.15515	0.00421	0.02557	0.00851	0.32691	0.04283	0.37224	0.07008	0.346153
Q9FGT8	AT5G58070	TIL	Temperature-induced lipocalin-1	?ER+vacuole	UNKNOWN	UNKNOWN	UNKNOWN	UNKNOWN	0.55035	0.55035	0.05407	1	0.44567	0.08949	0.00408	0.05122	0.01184	0.07511	0.01567	0.0038	0.0715	0.0081	0.04299	0.18053	0.53516	0.35618	0.344547
Q9SAH8	AT1G80830	NRAMP1	Metal transporter Nramp1	?VACUOLE+PM+extracellular+er?	UNKNOWN	UNKNOWN	UNKNOWN	UNKNOWN	0.72329	0.72329	0.15577	0.67857	0.14374	0.23403	0.00359	0.04959	0.17401	0.0192	0.00473	0.00515	0.00491	0.0311	0.02838	0.30156	0.37777	0.09029	0.343661
Q43731	AT4G37520	PER50	Peroxidase 50	ER+GOLGI	UNKNOWN	UNKNOWN	ER	GOLGI	0	0.34555	0	0.86905	0.55845	0.08904	0.01845	0.00244	0.00427	0.28184	0.00568	0.00543	0.00352	0.01397	0.01228	0.00462	0.64749	0.46941	0.343552
Q9S814	AT5G03280	EIN2	Ethylene-insensitive protein 2	?EXTRACELLULAR+er+pm	UNKNOWN	UNKNOWN	UNKNOWN	UNKNOWN	0.46188	0.46188	0.01594	1	0.1806	0.16741	0.00612	0.06549	0.44481	0.00879	0.00567	0.01291	0.01039	0.00586	0.07627	0.01568	0.34801	0.01319	0.34342
Q9LDH9	AT3G12870	MJM20.1	At3g12870	ER+UNKNOWN	UNKNOWN	UNKNOWN	ER	UNKNOWN	0	0.19122	0	0.97619	0.52329	0.08612	0.02825	0.00201	0.00541	0.01744	0.00419	0.00308	0.03908	0.0413	0.24147	0.00835	0.60941	0.43717	0.342994
F4IJE1	AT2G15900	SNX4	Phox domain-containing protein	PM+er?	UNKNOWN	UNKNOWN	PM	UNKNOWN	2e-05	2e-05	0	1	0.14109	0.76126	0.0043	0.00261	0.01871	0.0383	0.00361	0.00982	0.00292	0.01041	0.00368	0.00328	0.90235	0.62017	0.34274
Q9SJ81	AT2G04780	FLA7	Fasciclin-like arabinogalactan protein 7	?ER+PEROXISOME+nucleus	UNKNOWN	UNKNOWN	UNKNOWN	UNKNOWN	0.6166	0.6166	0.10054	0.9881	0.36049	0.09885	0.00756	0.00262	0.01193	0.00156	0.00419	0.18258	0.27898	0.02287	0.02541	0.00296	0.45934	0.26164	0.339158
Q8VY59	AT3G27200	Q8VY59	At3g27200	ER+NUCLEUS	UNKNOWN	UNKNOWN	ER	NUCLEUS	1e-05	0.14845	1e-05	0.86905	0.59413	0.08651	0.01207	0.00327	0.01396	0.00303	0.0025	0.21437	0.01266	0.0119	0.0412	0.00439	0.68064	0.50762	0.335134
Q6NKR3	AT3G55600	Q6NKR3	At3g55600	PM+er?	UNKNOWN	UNKNOWN	PM	UNKNOWN	0.00021	0.00021	0	1	0.11277	0.70241	0.00385	0.05122	0.08362	0.01165	0.00549	0.01044	0.00503	0.00461	0.00489	0.004	0.81518	0.58964	0.334517
Q945Q1	AT5G12140	CYS1	Cysteine proteinase inhibitor 1	GOLGI+PM+er?	UNKNOWN	UNKNOWN	GOLGI	PM	9e-05	0.24606	9e-05	1	0.13645	0.2326	0.00715	0.01271	0.0052	0.49453	0.01056	0.00365	0.00313	0.00486	0.00531	0.08387	0.36905	0.09615	0.333566
Q8VYK7	AT4G16520	ATG8F	Autophagy-related protein 8f	ER+unknown?	UNKNOWN	UNKNOWN	ER	UNKNOWN	0.00044	0.02605	0.00044	1	0.5415	0.07891	0.00516	0.07422	0.0894	0.00805	0.02285	0.00479	0.00559	0.00763	0.11003	0.05187	0.62041	0.46259	0.333415
Q9LSP7	AT3G17000	UBC32	Ubiquitin-conjugating enzyme E2 32	ER+pm?	UNKNOWN	UNKNOWN	ER	PM	0	0.00118	0	0.97619	0.77001	0.13655	0.00421	0.01167	0.01398	0.03476	0.00377	0.00523	0.00181	0.00875	0.00488	0.00438	0.90656	0.63346	0.332291
A0A1I9LQR3	AT3G58830	PGPP1	Haloacid dehalogenase	?MITOCHONDRION+er+pm+peroxisome?+unknown?	UNKNOWN	UNKNOWN	UNKNOWN	UNKNOWN	0.63515	0.63515	0.31109	0.52381	0.1934	0.1514	0.00471	0.00691	0.00692	0.00465	0.33346	0.00466	0.14953	0.01315	0.10481	0.0264	0.3448	0.042	0.330318
O81816	AT4G38540	MO2	Monooxygenase 2	ER+VACUOLE	UNKNOWN	UNKNOWN	ER	VACUOLE	0	0.19633	0	1	0.52971	0.07469	0.00681	0.00757	0.00396	0.09393	0.00814	0.00383	0.00519	0.00377	0.01387	0.24852	0.6044	0.45502	0.329386
Q9LJN2	AT3G19640	MRS2-3	Magnesium transporter MRS2-3	PM+er?	UNKNOWN	UNKNOWN	PM	UNKNOWN	3e-05	3e-05	0	1	0.1448	0.79709	0.00455	0.00141	0.00805	0.0109	0.00302	0.00724	0.00815	0.00718	0.00434	0.00327	0.94189	0.65229	0.327505
Q93ZN5	AT4G00090	Q93ZN5	AT4g00090/F6N15_8	ER+pm?	UNKNOWN	UNKNOWN	ER	UNKNOWN	3e-05	3e-05	0	1	0.77164	0.13295	0.00547	0.00653	0.01601	0.01735	0.00277	0.0208	0.00502	0.00273	0.00709	0.01164	0.90459	0.63869	0.326837
P40940	AT2G24765	ARF3	ADP-ribosylation factor 3	?ER+GOLGI+cytosol+pm?	UNKNOWN	UNKNOWN	UNKNOWN	UNKNOWN	0.64911	0.64911	0.10139	1	0.29735	0.10654	0.00568	0.17942	0.03934	0.24435	0.00738	0.0029	0.00434	0.01203	0.02989	0.07078	0.40389	0.19081	0.326824
O04083	AT1G11090	MAGL1	Alpha/beta-Hydrolases superfamily protein	?ER+VACUOLE+golgi?+pm?	UNKNOWN	UNKNOWN	UNKNOWN	UNKNOWN	0.68334	0.68334	0.05134	1	0.3054	0.10356	0.00538	0.08912	0.01835	0.12111	0.00859	0.0034	0.03257	0.00591	0.03903	0.26756	0.40896	0.20184	0.326416
F4I3K0	AT1G56120	F4I3K0	non-specific serine/threonine protein kinase	PM+er?	UNKNOWN	UNKNOWN	PM	UNKNOWN	0.00036	0.00036	0	0.72619	0.14228	0.79654	0.00397	0.0035	0.01279	0.00738	0.0023	0.00309	0.00852	0.00959	0.0055	0.00454	0.93882	0.65426	0.324588
O80489	AT1G09180	SARA1A	small monomeric GTPase	?ER+vacuole?+peroxisome?	UNKNOWN	UNKNOWN	UNKNOWN	UNKNOWN	0.21145	0.21145	0.03328	0.7619	0.45627	0.07121	0.00514	0.04274	0.08652	0.01539	0.00745	0.00537	0.12562	0.0085	0.04897	0.12683	0.52748	0.38506	0.324369
Q9FMQ5	AT5G22460	MWD9.26	Alpha/beta-Hydrolases superfamily protein	ER+golgi?	UNKNOWN	UNKNOWN	ER	GOLGI	1e-05	0.01579	1e-05	1	0.64654	0.08768	0.01484	0.00274	0.00361	0.14282	0.00439	0.00254	0.00217	0.00773	0.00619	0.07874	0.73422	0.55886	0.323894
Q9SL42	AT2G18040	PIN1	Peptidyl-prolyl cis-trans isomerase Pin1	?EXTRACELLULAR+PM+CYTOSOL+er?	UNKNOWN	UNKNOWN	UNKNOWN	UNKNOWN	0.64422	0.64422	0.135	1	0.1219	0.24693	0.00539	0.20996	0.35057	0.00653	0.00749	0.00657	0.00787	0.00848	0.00567	0.02265	0.36883	0.12503	0.322715
Q9ZT49	AT4G35480	ATL45	Probable E3 ubiquitin-protein ligase ATL45	PM+er?	UNKNOWN	UNKNOWN	PM	UNKNOWN	0	0	0	0.85714	0.12109	0.75121	0.00328	0.00238	0.01606	0.03161	0.00344	0.00478	0.0028	0.0553	0.00272	0.00532	0.8723	0.63012	0.322646
Q9LQ96	AT1G01630	Q9LQ96	Polyphosphoinositide binding protein, putative	?EXTRACELLULAR+PM+cytosol+er?	UNKNOWN	UNKNOWN	UNKNOWN	UNKNOWN	0.63349	0.63349	0.02431	0.88095	0.10884	0.28032	0.00507	0.16708	0.32202	0.00743	0.00758	0.00451	0.01236	0.00704	0.00773	0.07004	0.38916	0.17148	0.322427
Q9STW8	AT4G24260	KOR3	Endoglucanase 21	?EXTRACELLULAR+ER+tgn+pm?	UNKNOWN	UNKNOWN	UNKNOWN	UNKNOWN	0.69803	0.69803	0.02443	0.86905	0.29387	0.10372	0.00388	0.03223	0.29403	0.02891	0.00628	0.00294	0.00646	0.1584	0.00327	0.06601	0.39759	0.19015	0.321988
Q9SGH5	AT3G01430	Q9SGH5	NHL domain protein	GOLGI+ER+pm?	UNKNOWN	UNKNOWN	GOLGI	ER	0	0.20494	0	0.58333	0.23081	0.12786	0.00671	0.00441	0.00652	0.56751	0.00516	0.00435	0.00258	0.01426	0.00599	0.02386	0.35867	0.10295	0.321745
Q8LGI2	AT5G39410	Q8LGI2	Probable mitochondrial saccharopine dehydrogenase-like oxidoreductase At5g39410	ER+MITOCHONDRION	UNKNOWN	UNKNOWN	ER	MITOCHONDRION	0	0.34216	0	1	0.509	0.0671	0.00421	0.00716	0.00682	0.00251	0.28377	0.00441	0.0887	0.01192	0.00404	0.01036	0.5761	0.4419	0.321521
Q9STP2	AT4G27840	PHYL2.1	Phytolongin Phyl2.1	PM+er?	UNKNOWN	UNKNOWN	PM	UNKNOWN	0.00015	0.00015	0	0.57143	0.12678	0.7681	0.00649	0.00238	0.01256	0.03392	0.00662	0.0116	0.003	0.01508	0.01106	0.0024	0.89488	0.64132	0.320976
Q9FG93	AT5G43710	MNS4	Alpha-mannosidase I MNS4	EXTRACELLULAR+ER	UNKNOWN	UNKNOWN	EXTRACELLULAR	ER	0	0.42543	0	0.5	0.33815	0.08914	0.00564	0.00825	0.49142	0.00506	0.0054	0.00365	0.00989	0.02928	0.00311	0.011	0.42729	0.24901	0.320891
A0A1P8BGY1	AT5G48450	SKS3	SKU5 similar 3	?PEROXISOME+ER+UNKNOWN+pm?	UNKNOWN	UNKNOWN	UNKNOWN	UNKNOWN	0.70678	0.70678	0.29981	0.75	0.23582	0.12441	0.00513	0.01073	0.01731	0.01396	0.00551	0.00444	0.29583	0.01857	0.21873	0.04957	0.36023	0.11141	0.320097
Q8VYT1	AT1G66900	Q8VYT1	Alpha/beta-Hydrolases superfamily protein	?PEROXISOME+pm+vacuole+er?	UNKNOWN	UNKNOWN	UNKNOWN	UNKNOWN	0.83692	0.83692	0.46832	1	0.14981	0.18033	0.00285	0.08388	0.0614	0.01464	0.02066	0.00406	0.22357	0.00764	0.07817	0.173	0.33014	0.03052	0.320064
Q941R4	AT2G13650	GONST1	GDP-mannose transporter GONST1	GOLGI+ER	UNKNOWN	UNKNOWN	GOLGI	ER	0.00016	0.42806	0.00016	0.61905	0.32373	0.09158	0.00756	0.00378	0.00548	0.48075	0.00526	0.00397	0.00256	0.01283	0.01918	0.04332	0.41531	0.23215	0.318896
Q9SUT9	AT4G11220	RTNLB2	Reticulon-like protein B2	ER+pm?	UNKNOWN	UNKNOWN	ER	UNKNOWN	0.00013	0.00013	0	1	0.78874	0.13288	0.00386	0.00211	0.00743	0.02746	0.0028	0.00264	0.00179	0.01695	0.00215	0.0112	0.92162	0.65586	0.317166
A0A1P8AXK2	AT2G27810	NAT12	Nucleobase-ascorbate transporter 12	PM+er?	UNKNOWN	UNKNOWN	PM	UNKNOWN	6e-05	6e-05	0	1	0.12021	0.76499	0.00935	0.00203	0.00789	0.03254	0.00637	0.00394	0.03636	0.00532	0.00473	0.00626	0.8852	0.64478	0.314441
Q8L5V0	AT4G16265	NRPB9B	DNA-directed RNA polymerases II, IV and V subunit 9B	NUCLEUS+ER+pm?	UNKNOWN	UNKNOWN	NUCLEUS	ER	0	0.10279	0	0.86905	0.23782	0.11567	0.00883	0.00336	0.0106	0.00687	0.00534	0.58601	0.00678	0.00651	0.00719	0.00503	0.35349	0.12215	0.310311
Q9ASQ7	AT4G27970	SLAH2	S-type anion channel SLAH2	NUCLEUS+ER	UNKNOWN	UNKNOWN	NUCLEUS	ER	5e-05	0.46103	5e-05	0.72619	0.36457	0.0725	0.00739	0.00637	0.02192	0.01326	0.0038	0.44828	0.00375	0.0087	0.04438	0.00509	0.43707	0.29207	0.309415
Q8LD98	AT1G65690	NHL6	NDR1/HIN1-like protein 6	ER+TGN	UNKNOWN	UNKNOWN	ER	TGN	0	0.33453	0	0.75	0.55439	0.05676	0.00415	0.00108	0.00466	0.02782	0.00495	0.00564	0.00558	0.31156	0.02115	0.00226	0.61115	0.49763	0.307023
Q8GZ17	AT4G16120	COBL7	COBRA-like protein 7	TGN+ER+pm?	UNKNOWN	UNKNOWN	TGN	ER	0	0.06037	0	1	0.2455	0.10958	0.00248	0.00193	0.00643	0.0171	0.00295	0.00296	0.00517	0.59532	0.0049	0.00566	0.35508	0.13592	0.306818
Q9SL03	AT2G31960	CALS2	Callose synthase 2	PM+er?	UNKNOWN	UNKNOWN	PM	UNKNOWN	0	0	0	1	0.11492	0.77345	0.00558	0.00239	0.01265	0.06319	0.0041	0.00467	0.00331	0.00678	0.00397	0.00498	0.88837	0.65853	0.303352
Q9M250	AT3G43110	F7M19_120	At3g43110	ER+UNKNOWN	UNKNOWN	UNKNOWN	ER	UNKNOWN	0	0.30322	0	0.70238	0.50959	0.05074	0.00482	0.06185	0.02027	0.01548	0.01025	0.00569	0.00608	0.00903	0.28922	0.01698	0.56033	0.45885	0.303223
Q9XIC7	AT1G34210	SERK2	Somatic embryogenesis receptor kinase 2	PM+er?	UNKNOWN	PM	PM	UNKNOWN	8e-05	8e-05	0	1	0.13029	0.8071	0.00366	0.00177	0.00795	0.0089	0.00243	0.00405	0.00266	0.01177	0.01031	0.0091	0.93739	0.67681	0.302955
A0A1I9LSS8	AT3G11040	ENGASE85B	mannosyl-glycoprotein endo-beta-N-acetylglucosaminidase	ER+peroxisome?	UNKNOWN	UNKNOWN	ER	PEROXISOME	0	0.01642	0	1	0.60323	0.05962	0.00306	0.06184	0.01384	0.02084	0.06088	0.00366	0.10027	0.01298	0.03789	0.0219	0.66285	0.54361	0.302518
Q94JQ6	AT5G64740	CESA6	Cellulose synthase A catalytic subunit 6 [UDP-forming]	ER+golgi?+tgn?	UNKNOWN	UNKNOWN	ER	GOLGI	0	0.00404	0	1	0.64971	0.06962	0.00334	0.00287	0.01172	0.1036	0.00363	0.00225	0.0028	0.10307	0.0032	0.04418	0.71933	0.58009	0.302054
O49545	AT5G65700	BAM1	Leucine-rich repeat receptor-like serine/threonine-protein kinase BAM1	PM+er?	UNKNOWN	UNKNOWN	PM	UNKNOWN	0	0	0	1	0.13066	0.81114	0.00313	0.00148	0.00429	0.01031	0.00457	0.00224	0.00626	0.01014	0.00396	0.01183	0.9418	0.68048	0.300924
Q9C8H3	AT1G51570	FTIP4	FT-interacting protein 4	ER+CHLOROPLAST	UNKNOWN	EXTRACELLULAR	ER	CHLOROPLAST	1e-05	0.36105	1e-05	1	0.57702	0.05329	0.28905	0.00145	0.00282	0.02014	0.00257	0.00415	0.03429	0.00477	0.0083	0.00214	0.63031	0.52373	0.300198
Q9C942	AT1G52760	CSE	Caffeoylshikimate esterase	PEROXISOME+ER+mitochondrion?	UNKNOWN	UNKNOWN	PEROXISOME	ER	0.00024	0.36745	0.00024	1	0.27472	0.09124	0.003	0.00606	0.00902	0.00215	0.10199	0.00628	0.46944	0.01711	0.01252	0.00648	0.36596	0.18348	0.298814
Q9FII5	AT5G61480	TDR	Leucine-rich repeat receptor-like protein kinase TDR	PM+er?	UNKNOWN	UNKNOWN	PM	UNKNOWN	0	0	0	1	0.1017	0.7531	0.00288	0.00236	0.02317	0.00882	0.00275	0.00415	0.00421	0.08717	0.00292	0.00677	0.8548	0.6514	0.297983
Q6RF46	AT2G17705	Q6RF46	Methionine-S-oxide reductase	PM+er?	UNKNOWN	UNKNOWN	PM	UNKNOWN	1e-05	1e-05	0	0.82143	0.1262	0.80795	0.00824	0.00096	0.00917	0.00605	0.00278	0.0034	0.00382	0.02517	0.00328	0.00299	0.93415	0.68175	0.297293
Q9M0N1	AT4G10790	PUX10	Plant UBX domain-containing protein 10	?EXTRACELLULAR+ER+cytosol	UNKNOWN	UNKNOWN	UNKNOWN	UNKNOWN	0.61788	0.61788	0.00836	1	0.31155	0.0763	0.00741	0.18526	0.35057	0.01134	0.0075	0.01094	0.00597	0.00675	0.0111	0.01532	0.38785	0.23525	0.296608
F4IVN6	AT2G27030	CAM5	Calmodulin 5	?ER+EXTRACELLULAR+golgi?+cytosol?	UNKNOWN	UNKNOWN	UNKNOWN	UNKNOWN	0.71649	0.71649	0.18675	0.7381	0.31338	0.07501	0.00646	0.10595	0.22168	0.14383	0.00886	0.0079	0.00888	0.00405	0.01093	0.09308	0.38839	0.23837	0.295809
Q9S836	AT2G21050	LAX2	Auxin transporter-like protein 2	PM+er?	UNKNOWN	PM	PM	UNKNOWN	2e-05	2e-05	0	0.75	0.112	0.78163	0.02019	0.00194	0.01976	0.00204	0.00198	0.01073	0.02917	0.00487	0.01315	0.00254	0.89363	0.66963	0.295229
B9DHD7	AT1G08820	PVA22	Vesicle-associated protein 2-2	PM+er?	PM	PM	PM	UNKNOWN	0	0	0	1	0.10984	0.77882	0.00444	0.00227	0.01243	0.05993	0.00454	0.00472	0.0025	0.01318	0.00269	0.00463	0.88866	0.66898	0.294164
Q9LK26	AT3G27270	Q9LK26	At3g27270	ER+golgi?	UNKNOWN	UNKNOWN	ER	GOLGI	0	0.0153	0	0.5	0.71521	0.08347	0.00726	0.00265	0.00561	0.13137	0.00349	0.00942	0.00171	0.01471	0.01941	0.00569	0.79868	0.63174	0.294122
Q9LM02	AT5G13710	SMT1	Cycloartenol-C-24-methyltransferase	ER+pm?	UNKNOWN	UNKNOWN	ER	UNKNOWN	1e-05	1e-05	0	1	0.81593	0.12738	0.00387	0.00324	0.00292	0.00999	0.00394	0.00257	0.00506	0.00474	0.00445	0.01592	0.94331	0.68855	0.293794
Q9MAG3	AT1G53390	ABCG24	ABC transporter G family member 24	TGN+PM+er?	UNKNOWN	UNKNOWN	TGN	PM	0	0.04656	0	1	0.10506	0.22561	0.00196	0.00354	0.00702	0.02083	0.00344	0.0035	0.00448	0.60927	0.00473	0.01057	0.33067	0.12055	0.290808
Q94A18	AT3G16340	ABCG29	ABC transporter G family member 29	UNKNOWN+pm+er?	UNKNOWN	UNKNOWN	UNKNOWN	PM	0	0.08303	0	0.75	0.11862	0.19475	0.02044	0.00864	0.04429	0.00849	0.00203	0.011	0.01303	0.01362	0.55221	0.01287	0.31337	0.07613	0.289513
Q8S8Q6	AT2G23810	TET8	Tetraspanin-8	TGN+pm+er?	UNKNOWN	UNKNOWN	TGN	PM	0	0.00335	0	1	0.13703	0.15811	0.00239	0.00293	0.00866	0.02406	0.00366	0.00279	0.00439	0.63328	0.00465	0.01804	0.29514	0.02108	0.288918
Q9FRH7	AT1G25280	TULP10	Tubby-like F-box protein 10	?EXTRACELLULAR+PM+vacuole?+er?+cytosol?	UNKNOWN	UNKNOWN	UNKNOWN	UNKNOWN	0.58687	0.58687	0.04139	0.64286	0.10581	0.22039	0.00435	0.10412	0.30318	0.004	0.00951	0.01068	0.04022	0.00686	0.06351	0.12736	0.3262	0.11458	0.288824
Q9FI32	AT5G48060	MCTP2	Multiple C2 domain and transmembrane region protein 2	ER	UNKNOWN	UNKNOWN	ER	GOLGI	0.0001	0.00444	0.0001	0.61905	0.7483	0.09164	0.01503	0.00276	0.00248	0.09602	0.00549	0.00316	0.00312	0.00574	0.01296	0.01331	0.83994	0.65666	0.288385
Q9SRT7	AT3G02210	COBL1	COBRA-like protein 1	?ER+TGN+GOLGI	UNKNOWN	UNKNOWN	UNKNOWN	UNKNOWN	0.61274	0.61274	0.06619	1	0.36033	0.05479	0.00508	0.00181	0.00612	0.24124	0.00408	0.00455	0.0045	0.30473	0.00858	0.00419	0.41512	0.30554	0.288284
O64492	AT1G04150	MCTP10	Multiple C2 domain and transmembrane region protein 10	ER+peroxisome?	UNKNOWN	UNKNOWN	ER	UNKNOWN	4e-05	4e-05	0	0.91667	0.73768	0.08409	0.02341	0.00245	0.0048	0.01354	0.00463	0.00567	0.10477	0.00783	0.00628	0.00484	0.82177	0.65359	0.284669
O48946	AT4G32410	CESA1	Cellulose synthase A catalytic subunit 1 [UDP-forming]	ER+tgn?	UNKNOWN	UNKNOWN	ER	UNKNOWN	3e-05	3e-05	0	1	0.67548	0.06159	0.00292	0.00369	0.02218	0.07398	0.00355	0.00221	0.0027	0.11003	0.0028	0.03886	0.73707	0.61389	0.28459
Q8RWW9	AT5G25590	Q8RWW9	DNA ligase	PM+er?	UNKNOWN	UNKNOWN	PM	UNKNOWN	0	0	0	1	0.11067	0.79818	0.00448	0.00395	0.02375	0.02588	0.00263	0.01057	0.00409	0.00432	0.00665	0.00482	0.90885	0.68751	0.284007
Q501G9	AT4G33940	Q501G9	At4g33940	ER	UNKNOWN	UNKNOWN	ER	UNKNOWN	0	0	0	0.61905	0.65419	0.05441	0.00474	0.03225	0.09736	0.04307	0.00516	0.00329	0.00267	0.01764	0.02043	0.0648	0.7086	0.59978	0.283596
Q9LNW1	AT1G07410	RABA2B	Ras-related protein RABA2b	PM+er?	UNKNOWN	UNKNOWN	PM	UNKNOWN	0	0	0	1	0.10673	0.79095	0.00206	0.00636	0.01621	0.01359	0.0029	0.00335	0.00307	0.04569	0.00493	0.00418	0.89768	0.68422	0.283469
O48670	AT4G39220	RER1A	Protein RER1A	ER+golgi	UNKNOWN	UNKNOWN	ER	GOLGI	0	0.03898	0	1	0.64933	0.05246	0.00392	0.00375	0.00904	0.17764	0.00452	0.00238	0.00209	0.07411	0.00248	0.0183	0.70179	0.59687	0.282913
Q9CAN1	AT1G63120	RBL2	RHOMBOID-like protein 2	NUCLEUS+ER	UNKNOWN	UNKNOWN	NUCLEUS	ER	0	0.41471	0	1	0.31435	0.06306	0.0128	0.00209	0.00625	0.00699	0.00339	0.46789	0.08144	0.0137	0.02537	0.00267	0.37741	0.25129	0.282571
Q8VY68	AT4G08230	Q8VY68	Glycine-rich protein	ER+pm?	UNKNOWN	UNKNOWN	ER	UNKNOWN	1e-05	1e-05	0	1	0.82972	0.12466	0.0049	0.0018	0.00253	0.00594	0.00418	0.00355	0.0073	0.00468	0.00434	0.00642	0.95438	0.70506	0.281485
Q9C529	AT1G60870	MEE9	Maternal effect embryo arrest 9	CHLOROPLAST+pm+er?	UNKNOWN	EXTRACELLULAR	CHLOROPLAST	PM	7e-05	0.00465	7e-05	1	0.13355	0.15357	0.67343	0.00121	0.00382	0.00295	0.00148	0.0029	0.01839	0.00242	0.00304	0.00325	0.28712	0.02002	0.281372
F4KH40	AT5G24360	IRE1-1	non-specific serine/threonine protein kinase	ER	UNKNOWN	UNKNOWN	ER	UNKNOWN	0.00019	0.00019	0	0.88095	0.70491	0.06645	0.09957	0.00264	0.00205	0.00651	0.00545	0.00264	0.01937	0.00382	0.06716	0.01943	0.77136	0.63846	0.278877
Q949S4	AT1G14340	BPL3	RNA-binding	CHLOROPLAST+pm+er?	UNKNOWN	UNKNOWN	CHLOROPLAST	PM	4e-05	0.03776	4e-05	0.60714	0.11407	0.18386	0.60292	0.00211	0.00311	0.01321	0.00263	0.00384	0.00265	0.00413	0.06485	0.00263	0.29793	0.06979	0.277137
P59233	AT3G62250	RPS27AC	Ubiquitin-ribosomal protein eS31x fusion protein [Cleaved into: Ubiquitin; Small ribosomal subunit protein eS31x	?CYTOSOL+EXTRACELLULAR+PM+er?	UNKNOWN	RIBOSOMAL	UNKNOWN	UNKNOWN	0.54549	0.54549	0.02569	1	0.10148	0.2002	0.00648	0.41528	0.21822	0.00959	0.00671	0.00535	0.00821	0.00952	0.00787	0.01108	0.30168	0.09872	0.271898
Q9FNE2	AT5G40370	GRXC2	Glutaredoxin-C2	CYTOSOL+pm+er?	UNKNOWN	UNKNOWN	CYTOSOL	PM	0	0.01517	0	0.86905	0.11707	0.15832	0.00361	0.59513	0.03327	0.04086	0.00737	0.00331	0.00451	0.01964	0.00618	0.01073	0.27539	0.04125	0.26403
Q9S9L9	AT1G16180	Q9S9L9	Serinc-domain containing serine and sphingolipid biosynthesis protein	?VACUOLE+ER+golgi?	UNKNOWN	UNKNOWN	UNKNOWN	UNKNOWN	0.38889	0.38889	0.00717	0.85714	0.22745	0.0811	0.00404	0.00499	0.06414	0.12086	0.0073	0.00366	0.00413	0.04252	0.0033	0.43651	0.30855	0.14635	0.263394
Q9M2Z4	AT3G48890	MSBP2	Membrane steroid-binding protein 2	ER+pm?	ER	ER	ER	UNKNOWN	0	0	0	1	0.83495	0.11191	0.00379	0.00205	0.00528	0.01428	0.00281	0.0026	0.00184	0.00661	0.0024	0.01149	0.94686	0.72304	0.262242
Q8GUM5	AT3G52640	Q8GUM5	Nicastrin	TGN+pm?+er?	UNKNOWN	UNKNOWN	TGN	UNKNOWN	0.00059	0.00059	0	1	0.12027	0.14894	0.00212	0.00276	0.00559	0.01968	0.00323	0.00313	0.00441	0.67289	0.00527	0.01168	0.26921	0.02867	0.261492
O48851	AT2G32660	RLP22	Receptor like protein 22	ER+pm?	UNKNOWN	UNKNOWN	ER	UNKNOWN	0	0	0	1	0.82318	0.10164	0.00334	0.00182	0.00873	0.02511	0.00236	0.0029	0.00168	0.02015	0.00222	0.00687	0.92482	0.72154	0.257525
Q8W1S1	AT4G00550	DGD2	Digalactosyldiacylglycerol synthase 2, chloroplastic	?CYTOSOL+ER+EXTRACELLULAR	UNKNOWN	UNKNOWN	UNKNOWN	UNKNOWN	0.72534	0.72534	0.28486	1	0.21863	0.08	0.00478	0.23576	0.20798	0.02885	0.01218	0.00467	0.07457	0.00662	0.05457	0.0714	0.29863	0.13863	0.257231
Q9SJM8	AT2G36300	Q9SJM8	Protein YIP	ER	UNKNOWN	UNKNOWN	ER	UNKNOWN	9e-05	9e-05	0	1	0.74738	0.06309	0.00383	0.00698	0.08097	0.04479	0.00391	0.00261	0.00216	0.02522	0.00222	0.01685	0.81047	0.68429	0.255873
F4IWQ9	AT3G49060	F4IWQ9	RING-type E3 ubiquitin transferase	CYTOSOL+er+pm?	UNKNOWN	UNKNOWN	CYTOSOL	ER	0.00018	0.07233	0.00018	0.7381	0.17008	0.10321	0.00946	0.50537	0.07252	0.04032	0.00494	0.00877	0.00312	0.00834	0.06475	0.0091	0.27329	0.06687	0.255015
A0A1P8BBE5	AT5G01730	SCAR4	Protein SCAR	?UNKNOWN+peroxisome+er+vacuole?+pm?	UNKNOWN	UNKNOWN	UNKNOWN	UNKNOWN	0.72445	0.72445	0.13016	0.54762	0.16485	0.10362	0.00457	0.02495	0.03543	0.01788	0.00759	0.00635	0.17051	0.01015	0.30652	0.14758	0.26847	0.06123	0.252032
Q9SZB3	AT4G33360	FLDH	NAD(P)-binding Rossmann-fold superfamily protein	ER	UNKNOWN	ER	ER	UNKNOWN	2e-05	2e-05	0	0.5	0.78722	0.07758	0.00511	0.00387	0.00222	0.01898	0.053	0.00299	0.00723	0.00408	0.00981	0.02789	0.8648	0.70964	0.251103
Q9FHP6	AT5G37740	CAR1	Protein C2-DOMAIN ABA-RELATED 1	?CYTOSOL+ER+extracellular?	UNKNOWN	UNKNOWN	UNKNOWN	UNKNOWN	0.31093	0.31093	0.00317	1	0.24908	0.0599	0.00604	0.45159	0.13145	0.04626	0.00909	0.00442	0.00471	0.01008	0.0094	0.01798	0.30898	0.18918	0.250527
Q8VZV6	AT5G19290	MAGL16	Alpha/beta-Hydrolases superfamily protein	?EXTRACELLULAR+er+pm?	UNKNOWN	UNKNOWN	UNKNOWN	UNKNOWN	0.26919	0.26919	0.01999	0.88095	0.15122	0.10969	0.00397	0.0733	0.39391	0.00567	0.03497	0.00492	0.0667	0.00986	0.07212	0.07367	0.26091	0.04153	0.250074
F4J4H2	AT3G51650	F4J4H2	Stress response NST1-like protein	ER	UNKNOWN	UNKNOWN	ER	UNKNOWN	1e-05	1e-05	0	0.61905	0.79455	0.07872	0.00667	0.00317	0.01743	0.05312	0.00315	0.022	0.00236	0.01055	0.00525	0.00304	0.87327	0.71583	0.248157
O80961	AT2G39200	MLO12	MLO-like protein 12	?EXTRACELLULAR+tgn+pm?+er?	UNKNOWN	UNKNOWN	UNKNOWN	UNKNOWN	0.38551	0.38551	0.07991	0.96429	0.11637	0.1334	0.00487	0.00943	0.53564	0.00596	0.00396	0.00401	0.00991	0.16859	0.0038	0.00405	0.24977	0.01703	0.245516
Q9SHY3	AT1G65720	Q9SHY3	At1g65720/F1E22_13	ER	UNKNOWN	UNKNOWN	ER	UNKNOWN	0	0	0	0.61905	0.80107	0.07782	0.00333	0.0031	0.01718	0.03463	0.00209	0.00251	0.00184	0.03629	0.00329	0.01686	0.87889	0.72325	0.243233
Q9M622	AT5G66160	RMR1	Receptor homology region, transmembrane domain- and RING domain-containing protein 1	UNKNOWN+er?+pm?	UNKNOWN	UNKNOWN	UNKNOWN	ER	0.00014	0.00434	0.00014	0.75	0.13653	0.11163	0.01162	0.00643	0.01484	0.0284	0.00247	0.01779	0.00482	0.01494	0.64505	0.00549	0.24816	0.0249	0.241981
F4HZJ6	AT1G15240	SNX3	Phox	ER	ER	ER	ER	UNKNOWN	0	0	0	1	0.84299	0.09966	0.00325	0.00341	0.00603	0.01816	0.00246	0.0031	0.00188	0.00707	0.00229	0.0097	0.94265	0.74333	0.24195
F4JZL7	AT5G19090	HIPP33	Heavy metal-associated isoprenylated plant protein 33	?CHLOROPLAST+ER+golgi	UNKNOWN	UNKNOWN	UNKNOWN	UNKNOWN	0.49246	0.49246	0.11825	1	0.23623	0.05611	0.4186	0.00316	0.00362	0.16156	0.00433	0.00561	0.06893	0.00734	0.02987	0.00463	0.29234	0.18012	0.239684
A0A1P8AWL9	AT1G19970	A0A1P8AWL9	ER lumen protein retaining receptor family protein	GOLGI+ER+vacuole?	UNKNOWN	UNKNOWN	GOLGI	ER	0	0.25862	0	0.88095	0.21948	0.06388	0.00407	0.03205	0.00599	0.50933	0.00728	0.00202	0.00219	0.02701	0.00457	0.12213	0.28336	0.1556	0.239269
A0A178VYC5	AT2G01660	PDLP6	Plasmodesmata-located protein 6	?CHLOROPLAST+ER+UNKNOWN+golgi	UNKNOWN	UNKNOWN	UNKNOWN	UNKNOWN	0.72428	0.72428	0.37116	1	0.23353	0.05697	0.30486	0.00337	0.00475	0.16254	0.003	0.00634	0.00272	0.00879	0.21017	0.00297	0.2905	0.17656	0.239209
Q9LIK1	AT3G22950	ARFC1	ADP-ribosylation factor C1	?GOLGI+er+vacuole+cytosol?	UNKNOWN	UNKNOWN	UNKNOWN	UNKNOWN	0.57224	0.57224	0.06662	1	0.19219	0.07691	0.00518	0.12137	0.01483	0.38054	0.00869	0.00332	0.0064	0.00464	0.01458	0.17135	0.2691	0.11528	0.238078
Q8RWC3	AT3G19340	Q8RWC3	Aminopeptidase	ER	ER	ER	ER	UNKNOWN	0	0	0	1	0.84944	0.09835	0.00394	0.00181	0.00455	0.01707	0.00253	0.00324	0.00202	0.00731	0.00224	0.0075	0.94779	0.75109	0.235914
Q8GUI4	AT1G61900	Q8GUI4	Uncharacterized GPI-anchored protein At1g61900	EXTRACELLULAR+er?+pm?	UNKNOWN	UNKNOWN	EXTRACELLULAR	ER	0	0.00103	0	0.88095	0.14026	0.10161	0.00808	0.02815	0.6407	0.00295	0.00451	0.01496	0.01153	0.00718	0.02094	0.01912	0.24187	0.03865	0.232522
P38605	AT2G07050	CAS1	Cycloartenol synthase	ER	UNKNOWN	UNKNOWN	ER	UNKNOWN	0	0	0	1	0.84506	0.09232	0.00298	0.00661	0.00364	0.00431	0.005	0.0025	0.008	0.00394	0.00853	0.01711	0.93738	0.75274	0.231777
Q8GUI9	AT5G49900	Q8GUI9	Non-lysosomal glucosylceramidase	?CYTOSOL+ER+peroxisome?	UNKNOWN	UNKNOWN	UNKNOWN	UNKNOWN	0.61192	0.61192	0.10431	1	0.20366	0.06438	0.00436	0.30602	0.05457	0.06289	0.01146	0.00448	0.114	0.00655	0.07888	0.08876	0.26804	0.13928	0.230707
O64379	AT1G22750	O64379	AT1G22750 protein	?VACUOLE+GOLGI+er	UNKNOWN	UNKNOWN	UNKNOWN	UNKNOWN	0.38513	0.38513	0.02318	1	0.17786	0.07559	0.0042	0.00626	0.00883	0.23382	0.00515	0.00252	0.0025	0.01161	0.00502	0.46663	0.25345	0.10227	0.22753
A8MR93	AT1G02145	ALG12	Dol-P-Man:Man(7)GlcNAc(2)-PP-Dol alpha-1,6-mannosyltransferase	ER	UNKNOWN	UNKNOWN	ER	UNKNOWN	0	0	0	1	0.79865	0.05985	0.00572	0.00211	0.00514	0.09355	0.00363	0.00254	0.0016	0.01693	0.00344	0.00683	0.8585	0.7388	0.22424
Q9ASQ2	AT5G45420	MAMYB	Transcription factor MAMYB	ER	UNKNOWN	UNKNOWN	ER	UNKNOWN	0	0	0	1	0.81995	0.06671	0.00469	0.01557	0.02787	0.01621	0.00373	0.02746	0.00253	0.00438	0.00508	0.00582	0.88666	0.75324	0.218792
Q9SB70	AT4G24760	Q9SB70	Alpha/beta-Hydrolases superfamily protein	?UNKNOWN+EXTRACELLULAR+er	UNKNOWN	UNKNOWN	UNKNOWN	UNKNOWN	0.5842	0.5842	0.01063	0.63095	0.18662	0.06179	0.00633	0.01669	0.27741	0.00683	0.00605	0.00771	0.02468	0.05187	0.32473	0.0293	0.24841	0.12483	0.217401
F4HX35	AT1G62040	ATG8C	Autophagy-related protein	EXTRACELLULAR+er?	UNKNOWN	UNKNOWN	EXTRACELLULAR	ER	0	0.0405	0	0.7381	0.13465	0.09223	0.00542	0.03077	0.68301	0.00519	0.00591	0.00861	0.0071	0.00601	0.00349	0.01762	0.22688	0.04242	0.217256
Q9LFJ7	AT5G17060	ARFB1B	ADP-ribosylation factor	?CYTOSOL+er+extracellular+vacuole?	UNKNOWN	UNKNOWN	UNKNOWN	UNKNOWN	0.65229	0.65229	0.18019	0.63095	0.1811	0.06252	0.00447	0.31985	0.15882	0.06	0.00865	0.0041	0.00856	0.00647	0.05648	0.12898	0.24362	0.11858	0.214732
Q9ZS88	AT4G04860	DER2.2	Derlin-2.2	ER	UNKNOWN	UNKNOWN	ER	UNKNOWN	0	0	0	0.9881	0.86072	0.08538	0.00425	0.00134	0.00403	0.01622	0.00287	0.00199	0.00167	0.01138	0.00193	0.00822	0.9461	0.77534	0.212551
Q8VZU9	AT4G29330	DER1	Derlin-1	ER	UNKNOWN	UNKNOWN	ER	UNKNOWN	0	0	0	0.97619	0.85951	0.08298	0.00385	0.00198	0.00477	0.01589	0.00277	0.0024	0.00189	0.00578	0.00229	0.01589	0.94249	0.77653	0.210618
B8XCH5	AT1G74720	QKY	Protein QUIRKY	ER	UNKNOWN	UNKNOWN	ER	UNKNOWN	0	0	0	1	0.82155	0.05398	0.01833	0.00805	0.00572	0.04456	0.00275	0.00448	0.00952	0.00435	0.02274	0.00397	0.87553	0.76757	0.203499
Q9M2L3	AT3G57340	F28O9.190	AT3G57340 protein	ER	UNKNOWN	UNKNOWN	ER	UNKNOWN	0	0	0	1	0.86444	0.07933	0.00385	0.00335	0.00684	0.01494	0.002	0.00832	0.00193	0.0055	0.00389	0.0056	0.94377	0.78511	0.202807
Q9XEB5	AT4G04620	ATG8B	Autophagy-related protein 8b	EXTRACELLULAR+er?+cytosol?	UNKNOWN	UNKNOWN	EXTRACELLULAR	ER	0.00013	0.09028	0.00013	0.61905	0.14609	0.07268	0.00493	0.11849	0.54176	0.00446	0.00928	0.00691	0.0239	0.0083	0.01419	0.04901	0.21877	0.07341	0.20271
Q9C5D3	AT5G63530	HIPP07	Heavy metal-associated isoprenylated plant protein 7	?CHLOROPLAST+GOLGI+er	UNKNOWN	UNKNOWN	UNKNOWN	UNKNOWN	0.5583	0.5583	0.05499	1	0.17384	0.05536	0.38844	0.00328	0.00294	0.26579	0.00519	0.00435	0.01001	0.00659	0.08015	0.00407	0.2292	0.11848	0.202044
O23657	AT1G43890	RABC1	Ras-related protein RABC1	ER	UNKNOWN	UNKNOWN	ER	UNKNOWN	0	0	0	1	0.85537	0.07218	0.00285	0.00258	0.00358	0.01829	0.00272	0.00177	0.00186	0.01215	0.00339	0.02325	0.92755	0.78319	0.201102
Q9FJB4	AT5G35460	GPC1	Glycerophosphocholine acyltransferase 1	ER	UNKNOWN	UNKNOWN	ER	UNKNOWN	0	0	0	1	0.87382	0.08178	0.00457	0.00146	0.00377	0.01251	0.00257	0.0021	0.002	0.00605	0.00225	0.00713	0.9556	0.79204	0.198727
O23087	AT4G00900	ECA2	Calcium-transporting ATPase 2, endoplasmic reticulum-type	ER	ER	ER	ER	UNKNOWN	0	0	0	1	0.84512	0.05876	0.00375	0.00542	0.00798	0.03487	0.0031	0.00248	0.00152	0.00546	0.00343	0.0281	0.90388	0.78636	0.193105
F4JKK0	AT4G34100	SUD1	Probable E3 ubiquitin ligase SUD1	ER	UNKNOWN	UNKNOWN	ER	UNKNOWN	0	0	0	1	0.87135	0.07268	0.00474	0.00252	0.0038	0.02056	0.0022	0.00274	0.00162	0.00897	0.00306	0.00577	0.94403	0.79867	0.190062
Q52K84	AT4G13270	Q52K84	At4g13270	VACUOLE+er	UNKNOWN	UNKNOWN	VACUOLE	ER	0	0.01513	0	0.84524	0.15353	0.05419	0.00214	0.03762	0.04745	0.07246	0.00524	0.00243	0.00261	0.03659	0.00481	0.58093	0.20772	0.09934	0.187085
Q8RX89	AT5G23390	Q8RX89	AT5g23390/T32G24_2	ER	UNKNOWN	UNKNOWN	ER	UNKNOWN	0	0	0	1	0.87703	0.07317	0.00274	0.00165	0.00536	0.00889	0.00185	0.00212	0.00164	0.01558	0.00208	0.00789	0.9502	0.80386	0.186372
Q9LN67	AT1G19310	Q9LN67	E3 ubiquitin-protein ligase RMA	ER	UNKNOWN	UNKNOWN	ER	UNKNOWN	0	0	0	0.72619	0.85894	0.0594	0.00359	0.00705	0.0244	0.02194	0.00265	0.00524	0.00161	0.00697	0.00285	0.00535	0.91834	0.79954	0.18409
O22757	AT2G17480	MLO8	MLO-like protein 8	TGN+er?	UNKNOWN	UNKNOWN	TGN	UNKNOWN	0	0	0	1	0.13777	0.06075	0.00183	0.00214	0.00827	0.01721	0.00237	0.00244	0.00339	0.75198	0.00429	0.00755	0.19852	0.07702	0.18323
Q94IB9	AT4G22330	ACER	Alkaline ceramidase	ER	UNKNOWN	UNKNOWN	ER	UNKNOWN	0	0	0	0.97619	0.85622	0.05417	0.00352	0.00526	0.00591	0.04651	0.00301	0.00238	0.00126	0.0104	0.00296	0.00838	0.91039	0.80205	0.180212
O82391	AT2G29640	O82391	Josephin-like protein	?PEROXISOME+UNKNOWN+er?	UNKNOWN	UNKNOWN	UNKNOWN	UNKNOWN	0.5842	0.5842	0.08739	0.5119	0.13579	0.05806	0.00473	0.01517	0.08956	0.00296	0.00585	0.00776	0.36492	0.02344	0.28555	0.00622	0.19385	0.07773	0.178782
F4I340	AT1G29760	SEI2	Seipin-2	ER	UNKNOWN	UNKNOWN	ER	UNKNOWN	0	0	0	1	0.88439	0.06872	0.00481	0.00175	0.00424	0.01079	0.00146	0.00473	0.00215	0.00911	0.00529	0.00255	0.95311	0.81567	0.175687
Q9LVP2	AT3G29170	Q9LVP2	At3g29170	ER	UNKNOWN	UNKNOWN	ER	UNKNOWN	0	0	0	0.9881	0.8816	0.06329	0.00486	0.00153	0.00227	0.02027	0.00332	0.00226	0.00151	0.01078	0.00313	0.00519	0.94489	0.81831	0.171677
O04478	AT1G65610	KOR2	Endoglucanase 7	?EXTRACELLULAR+TGN+vacuole?+er?	UNKNOWN	UNKNOWN	UNKNOWN	UNKNOWN	0.55088	0.55088	0.00882	1	0.10019	0.07568	0.00414	0.01342	0.42577	0.01912	0.00628	0.00289	0.01003	0.21722	0.00685	0.1184	0.17587	0.02451	0.171559
F4J510	AT3G10970	F4J510	Haloacid dehalogenase-like hydrolase	CHLOROPLAST+er?+unknown?	UNKNOWN	UNKNOWN	CHLOROPLAST	ER	2e-05	0.00211	2e-05	0.86905	0.12784	0.05409	0.6476	0.00378	0.02456	0.00329	0.00073	0.00343	0.01118	0.01313	0.10679	0.00359	0.18193	0.07375	0.168513
F4IBV4	AT1G78800	F4IBV4	Alpha-1,3/1,6-mannosyltransferase ALG2	ER	UNKNOWN	UNKNOWN	ER	UNKNOWN	0	0	0	1	0.88114	0.05745	0.0022	0.00422	0.01112	0.00647	0.00205	0.00242	0.00176	0.01055	0.00253	0.0181	0.93859	0.82369	0.165483
F4JNS8	AT4G35730	ISTL3	Regulator of Vps4 activity in the MVB pathway protein	UNKNOWN+er?	UNKNOWN	UNKNOWN	UNKNOWN	UNKNOWN	0	0	0	0.7619	0.1038	0.0671	0.00404	0.02421	0.04395	0.00896	0.00491	0.00772	0.02235	0.01168	0.67985	0.02143	0.1709	0.0367	0.164628
F4JDI1	AT3G20120	CYP705A21	Cytochrome P450, family 705, subfamily A, polypeptide 21	ER	UNKNOWN	UNKNOWN	ER	UNKNOWN	0	0	0	0.7381	0.88281	0.05744	0.00609	0.00168	0.00283	0.02397	0.00261	0.00295	0.00166	0.01089	0.00402	0.00304	0.94025	0.82537	0.164196
Q0WRJ2	AT3G06060	TSC10A	3-dehydrosphinganine reductase TSC10A	ER	UNKNOWN	UNKNOWN	ER	UNKNOWN	0	0	0	1	0.88864	0.0614	0.00323	0.0023	0.00683	0.01303	0.0022	0.00234	0.00176	0.00578	0.00226	0.01024	0.95004	0.82724	0.164129
F4JIW8	AT4G33360	FLDH	NAD(P)-binding Rossmann-fold superfamily protein	ER	UNKNOWN	UNKNOWN	ER	UNKNOWN	0	0	0	0.5	0.88914	0.05472	0.00339	0.00176	0.00294	0.0043	0.00595	0.00142	0.00322	0.00976	0.00711	0.01629	0.94386	0.83442	0.156284
O64631	AT2G45510	CYP704A2	At2g45510	ER	ER	ER	ER	UNKNOWN	0	0	0	1	0.89071	0.05214	0.00457	0.00175	0.00423	0.02413	0.0021	0.00275	0.00174	0.00813	0.00275	0.005	0.94285	0.83857	0.152204
Q9FKE9	AT5G45160	Q9FKE9	Protein ROOT HAIR DEFECTIVE 3 homolog 2	ER	ER	ER	ER	UNKNOWN	0	0	0	1	0.90469	0.05375	0.0032	0.00211	0.00277	0.01126	0.00223	0.00228	0.00154	0.00734	0.00217	0.00667	0.95844	0.85094	0.142865

## Sheet: 3. ER-Golgi LOPIT
protein_id	alt_ids	gene_name	description	prediction	train_organelle	suborganelle	pred_class1	pred_class2	p_val	p_val_single	p_val_dual	completeness	ER	GOLGI	MITOCHONDRION	CHLOROPLAST	CYTOSOL	EXTRACELLULAR	NUCLEUS	PEROXISOME	PM	TGN	UNKNOWN	VACUOLE	ER+Golgi	ER-Golgi	(ER+Golgi.)*(1-ABS(ER-Golgi))
Q84K46	AT1G27330;AT1G27350	Q84K46	At1g27330	GOLGI+ER	UNKNOWN	UNKNOWN	GOLGI	ER	0	0.50333	0	0.9881	0.46839	0.46873	0.00598	0.01104	0.00144	0.00352	0.00869	0.00496	0.00396	0.01082	0.00932	0.00316	0.93712	0.00034	0.936801
Q9XIP7	AT1G64990	GTG1	GPCR-type G protein 1	GOLGI+ER	UNKNOWN	UNKNOWN	GOLGI	ER	0	0.49499	0	1	0.46387	0.47887	0.00386	0.00593	0.00336	0.00647	0.00381	0.00242	0.00577	0.01054	0.00697	0.00813	0.94274	0.015	0.928599
Q8LEJ9	AT4G26940	B3GALT4	Probable beta-1,3-galactosyltransferase 4	GOLGI+ER	UNKNOWN	UNKNOWN	GOLGI	ER	0	0.49283	0	1	0.46082	0.47918	0.00371	0.00611	0.00276	0.0126	0.00794	0.00306	0.0032	0.00962	0.00688	0.00413	0.94	0.01836	0.922742
Q9LN20	AT1G20270	P4H3	Probable prolyl 4-hydroxylase 3	GOLGI+ER	GOLGI	GOLGI CIS	GOLGI	ER	0	0.48375	0	1	0.4422	0.4811	0.00382	0.00422	0.00224	0.01023	0.00325	0.00183	0.01013	0.02984	0.0036	0.00754	0.9233	0.0389	0.887384
O48947	AT4G39350	CESA2	Cellulose synthase A catalytic subunit 2 [UDP-forming]	ER+GOLGI	UNKNOWN	UNKNOWN	ER	GOLGI	0	0.49629	0	1	0.44804	0.44011	0.00447	0.00448	0.00518	0.00662	0.00233	0.00399	0.01845	0.03116	0.01627	0.01889	0.88815	0.00793	0.881107
Q84K13	AT4G33440	Q84K13	Pectin lyase-like superfamily protein	GOLGI+ER	UNKNOWN	UNKNOWN	GOLGI	ER	0	0.48825	0	0.88095	0.42228	0.45158	0.00301	0.01453	0.001	0.03749	0.00192	0.00306	0.00311	0.05209	0.00804	0.00188	0.87386	0.0293	0.848256
Q9M2K7	AT3G57400	F28O9.250	Transmembrane protein	GOLGI+ER	UNKNOWN	UNKNOWN	GOLGI	ER	0	0.45933	0	1	0.41508	0.49606	0.00385	0.00425	0.01065	0.01358	0.0033	0.00162	0.01342	0.01922	0.00701	0.01197	0.91114	0.08098	0.837356
Q9LV85	AT5G64930	CPR5	Protein CPR-5	GOLGI+ER	UNKNOWN	UNKNOWN	GOLGI	ER	0	0.50581	0	0.57143	0.41245	0.4417	0.01752	0.00692	0.00283	0.00489	0.00576	0.00389	0.00561	0.00936	0.08025	0.00882	0.85415	0.02925	0.829166
Q9SKT6	AT2G20810	GAUT10	Probable galacturonosyltransferase 10	ER+GOLGI	UNKNOWN	GOLGI CIS	ER	GOLGI	0	0.37448	0	1	0.56178	0.38416	0.00554	0.00604	0.00231	0.00696	0.00336	0.00313	0.00275	0.01265	0.00646	0.00486	0.94594	0.17762	0.777922
Q9SSP6	AT1G52420	F6D8.36	At1g52420	ER+GOLGI	GOLGI	GOLGI CIS	ER	GOLGI	0	0.35885	0	1	0.55874	0.37999	0.0041	0.00553	0.00172	0.01724	0.00398	0.00216	0.0034	0.01507	0.0043	0.00376	0.93873	0.17875	0.770932
Q8GWT1	AT5G15470	GAUT14	Probable galacturonosyltransferase 14	GOLGI+ER	UNKNOWN	UNKNOWN	GOLGI	ER	0	0.39903	0	0.9881	0.36997	0.53872	0.00392	0.0041	0.00439	0.02872	0.01135	0.00216	0.00359	0.01583	0.01016	0.0071	0.90869	0.16875	0.755349
Q0WUZ5	AT5G65470	OFUT39	O-fucosyltransferase 39	GOLGI+ER	UNKNOWN	GOLGI CIS	GOLGI	ER	0	0.30568	0	1	0.36733	0.57619	0.00549	0.00487	0.00215	0.00625	0.00287	0.00283	0.00421	0.01476	0.00598	0.00706	0.94352	0.20886	0.746456
A0A1P8AYR1	AT2G40030	NRPD1B	DNA-directed RNA polymerase	ER+GOLGI	UNKNOWN	UNKNOWN	ER	GOLGI	0	0.36227	0	0.61905	0.54693	0.36522	0.00378	0.00431	0.00278	0.01735	0.00314	0.0016	0.01492	0.02601	0.00338	0.01056	0.91215	0.18171	0.746403
Q8GWC3	AT5G05987	PRA1A2	PRA1 family protein A2	ER+GOLGI	UNKNOWN	UNKNOWN	ER	GOLGI	0	0.50664	0	1	0.47806	0.3457	0.00527	0.00572	0.01344	0.00631	0.00267	0.00221	0.02969	0.0089	0.00991	0.09212	0.82376	0.13236	0.714727
Q93VG3	AT5G19120	Q93VG3	AT5g19120/T24G5_20	GOLGI+ER	UNKNOWN	UNKNOWN	GOLGI	ER	0	0.45483	0	0.95238	0.3394	0.51014	0.00219	0.07013	0.00091	0.00856	0.00328	0.00218	0.00574	0.03984	0.01599	0.00164	0.84954	0.17074	0.70449
A4IJ37	AT2G02910	AT2G02910.1	At2g02910	GOLGI+ER	UNKNOWN	UNKNOWN	GOLGI	ER	0	0.24154	0	1	0.34241	0.60022	0.00395	0.00444	0.00219	0.01393	0.00495	0.00237	0.00321	0.01356	0.00446	0.00432	0.94263	0.25781	0.699611
O22151	AT2G45200	GOS12	Golgi SNAP receptor complex member 1-2	GOLGI+ER+cytosol?	UNKNOWN	UNKNOWN	GOLGI	ER	0.00025	0.55026	0.00025	1	0.34472	0.37626	0.00829	0.00748	0.13298	0.07451	0.00607	0.00256	0.01749	0.00838	0.01006	0.01119	0.72098	0.03154	0.69824
A5HEI1	AT5G15540	SCC2	Sister chromatid cohesion protein SCC2	GOLGI+ER	UNKNOWN	UNKNOWN	GOLGI	ER	0	0.424	0	0.61905	0.33506	0.46693	0.00416	0.01198	0.00294	0.00552	0.01014	0.00265	0.04094	0.02676	0.08738	0.00557	0.80199	0.13187	0.696232
Q84WV9	AT4G25720	QCT	Glutaminyl-peptide cyclotransferase	GOLGI+ER	UNKNOWN	UNKNOWN	GOLGI	ER	0	0.28751	0	0.88095	0.33144	0.58563	0.00383	0.00362	0.00649	0.00865	0.004	0.00188	0.01553	0.01538	0.00738	0.01617	0.91707	0.25419	0.68396
A0A1P8BBG9	AT5G19025	A0A1P8BBG9	Ribosomal protein L34e superfamily protein	ER+GOLGI	UNKNOWN	UNKNOWN	ER	GOLGI	9e-05	0.43757	9e-05	0.94048	0.47576	0.32392	0.00444	0.00723	0.0115	0.03263	0.08829	0.002	0.00866	0.01083	0.02998	0.00476	0.79968	0.15184	0.678257
Q941R4	AT2G13650	GONST1	GDP-mannose transporter GONST1	GOLGI+ER	UNKNOWN	UNKNOWN	GOLGI	ER	0.00016	0.42806	0.00016	0.61905	0.32373	0.48075	0.00526	0.00756	0.00378	0.00548	0.00397	0.00256	0.09158	0.01283	0.01918	0.04332	0.80448	0.15702	0.678161
Q949Q1	AT1G18580	GAUT11	Hexosyltransferase GAUT11	GOLGI+ER	UNKNOWN	GOLGI CIS	GOLGI	ER	0	0.21401	0	1	0.32851	0.60454	0.00349	0.00399	0.00377	0.01229	0.00292	0.00157	0.00752	0.02003	0.0046	0.00679	0.93305	0.27603	0.6755
Q9M043	AT3G55820	F1I16_230	At3g55820	GOLGI+ER+unknown	UNKNOWN	UNKNOWN	GOLGI	ER	0.00096	0.55286	0.00096	0.79762	0.3238	0.42838	0.00844	0.00895	0.00779	0.01502	0.00435	0.00577	0.00444	0.00862	0.17314	0.01129	0.75218	0.10458	0.673517
A8MQN4	AT1G53710	A8MQN4	Calcineurin-like metallo-phosphoesterase superfamily protein	GOLGI+ER	GOLGI	GOLGI CIS	GOLGI	ER	0	0.19317	0	1	0.3223	0.61055	0.00358	0.00425	0.00195	0.01061	0.00274	0.00187	0.00807	0.02269	0.00378	0.00761	0.93285	0.28825	0.663956
F4JZ24	AT5G66060	P4H10	Probable prolyl 4-hydroxylase 10	GOLGI+ER	GOLGI	GOLGI CIS	GOLGI	ER	0	0.19875	0	1	0.31775	0.62101	0.00378	0.00401	0.00228	0.00797	0.00319	0.00186	0.00794	0.01866	0.00399	0.00756	0.93876	0.30326	0.654072
Q9LMK6	AT1G07135	F10K1.16	At1g07135	GOLGI+ER+tgn	UNKNOWN	UNKNOWN	GOLGI	ER	0.00023	0.48492	0.00023	0.72619	0.30534	0.4526	0.00531	0.00528	0.00217	0.00462	0.00238	0.00278	0.02688	0.18192	0.00384	0.00689	0.75794	0.14726	0.646326
Q67YS6	AT5G46150	ALIS2	Putative ALA-interacting subunit 2	GOLGI+ER	UNKNOWN	UNKNOWN	GOLGI	ER	0	0.28631	0	1	0.30433	0.54983	0.00415	0.00315	0.00469	0.02021	0.00226	0.0025	0.01756	0.06291	0.00339	0.02502	0.85416	0.2455	0.644464
O80612	AT2G02970	APY6	Probable apyrase 6	?ER+GOLGI+TGN	UNKNOWN	UNKNOWN	UNKNOWN	UNKNOWN	0.55514	0.55514	0.00995	1	0.40952	0.28713	0.00405	0.00418	0.00174	0.05332	0.00217	0.00335	0.00371	0.22432	0.00372	0.00279	0.69665	0.12239	0.611387
Q43731	AT4G37520	PER50	Peroxidase 50	ER+GOLGI	UNKNOWN	UNKNOWN	ER	GOLGI	0	0.34555	0	0.86905	0.55845	0.28184	0.00568	0.01845	0.00244	0.00427	0.00543	0.00352	0.08904	0.01397	0.01228	0.00462	0.84029	0.27661	0.607857
A0A1P8AP19	AT1G10540	NAT8	Nucleobase-ascorbate transporter 8	GOLGI+ER	UNKNOWN	UNKNOWN	GOLGI	ER	0	0.306	0	0.5	0.2743	0.49478	0.00831	0.01138	0.00534	0.00968	0.00504	0.07241	0.01479	0.01485	0.06238	0.02673	0.76908	0.22048	0.599513
Q9SCV8	AT5G56870	BGAL4	Beta-galactosidase 4	?GOLGI+ER+pm?	UNKNOWN	UNKNOWN	UNKNOWN	UNKNOWN	0.51017	0.51017	0.00754	0.69048	0.27695	0.40805	0.00535	0.01218	0.00332	0.00711	0.02538	0.00321	0.13202	0.04618	0.07508	0.00518	0.685	0.1311	0.595197
Q8LD89	AT4G38790	Q8LD89	ER lumen protein retaining receptor family protein	GOLGI+ER+vacuole?	UNKNOWN	UNKNOWN	GOLGI	ER	0	0.29004	0	0.63095	0.26299	0.49403	0.00615	0.00332	0.02524	0.00807	0.00244	0.00187	0.02349	0.0219	0.01861	0.13189	0.75702	0.23104	0.582118
Q9LTZ0	AT3G27400	Q9LTZ0	Putative pectate lyase 11	ER+GOLGI	UNKNOWN	UNKNOWN	ER	GOLGI	0	0.20211	0	1	0.58068	0.26527	0.00544	0.00464	0.0314	0.02416	0.00258	0.00243	0.01685	0.01768	0.01078	0.0381	0.84595	0.31541	0.579129
Q94A20	AT4G15470	LFG5	BI1-like protein	ER+GOLGI	UNKNOWN	UNKNOWN	ER	GOLGI	0	0.25309	0	0.59524	0.62049	0.27022	0.00285	0.00412	0.00314	0.00848	0.01088	0.00269	0.02493	0.01975	0.0178	0.01466	0.89071	0.35027	0.578721
Q9SJL2	AT2G36950	HIPP05	Heavy metal-associated isoprenylated plant protein 5	?ER+GOLGI+PM	UNKNOWN	UNKNOWN	UNKNOWN	UNKNOWN	0.64852	0.64852	0.27292	1	0.34383	0.27556	0.00549	0.03968	0.00397	0.00622	0.00847	0.00613	0.24621	0.01026	0.04832	0.00586	0.61939	0.06827	0.577104
Q8L7Y9	AT1G07230	NPC1	Non-specific phospholipase C1	GOLGI+ER	GOLGI	GOLGI CIS	GOLGI	ER	0	0.05677	0	1	0.26966	0.63466	0.0039	0.00363	0.00834	0.03501	0.00249	0.00178	0.00628	0.01942	0.00514	0.00969	0.90432	0.365	0.574243
Q9FPJ5	AT5G21090	LRR1	Leucine-rich repeat protein 1	?ER+TGN+GOLGI	UNKNOWN	UNKNOWN	UNKNOWN	UNKNOWN	0.5558	0.5558	0.09345	1	0.44001	0.25954	0.00485	0.00584	0.00102	0.00453	0.00206	0.00347	0.00718	0.26512	0.00368	0.0027	0.69955	0.18047	0.573302
Q9M1C9	AT3G60140	BGLU30	Beta-glucosidase 30	?GOLGI+ER+pm	UNKNOWN	UNKNOWN	UNKNOWN	UNKNOWN	0.45872	0.45872	0.06563	0.7381	0.25883	0.43693	0.009	0.01604	0.00273	0.00504	0.00718	0.0031	0.19901	0.02425	0.03043	0.00746	0.69576	0.1781	0.571845
Q39182	AT2G02100	PDF2.2	Defensin-like protein 2	?ER+GOLGI+cytosol?	UNKNOWN	UNKNOWN	UNKNOWN	UNKNOWN	0.44321	0.44321	0.01616	0.9881	0.44585	0.25787	0.00865	0.00566	0.14177	0.0218	0.00409	0.00224	0.02471	0.00654	0.01084	0.06998	0.70372	0.18798	0.571435
Q8LAN3	AT5G18900	P4H4	Probable prolyl 4-hydroxylase 4	ER+GOLGI	UNKNOWN	GOLGI CIS	ER	GOLGI	0	0.06145	0	1	0.68038	0.26131	0.00363	0.00425	0.00224	0.00669	0.00318	0.00166	0.00662	0.02061	0.00352	0.0059	0.94169	0.41907	0.547056
Q9LIH7	AT3G18620	PAT11	Protein S-acyltransferase 11	ER+GOLGI	UNKNOWN	UNKNOWN	ER	GOLGI	0	0.08608	0	0.5	0.61694	0.24656	0.00446	0.00377	0.00499	0.05404	0.00291	0.00235	0.00527	0.0451	0.00495	0.00866	0.8635	0.37038	0.543677
Q9SS68	AT3G03680	MCTP14	Multiple C2 domain and transmembrane region protein 14	?GOLGI+ER+CHLOROPLAST	UNKNOWN	UNKNOWN	UNKNOWN	UNKNOWN	0.69417	0.69417	0.26272	1	0.25516	0.32231	0.00551	0.24937	0.00366	0.00316	0.0056	0.02168	0.02988	0.00816	0.09185	0.00366	0.57747	0.06715	0.538693
Q9LJR2	AT3G15356	LEC	Lectin-like protein LEC	?GOLGI+TGN+ER	UNKNOWN	EXTRACELLULAR	UNKNOWN	UNKNOWN	0.59524	0.59524	0.04919	1	0.23975	0.39082	0.00387	0.00349	0.00163	0.04302	0.00279	0.00328	0.00303	0.30275	0.0037	0.00188	0.63057	0.15107	0.53531
O82301	AT2G35360	O82301	Ubiquitin family protein	?ER+TGN+GOLGI	UNKNOWN	UNKNOWN	UNKNOWN	UNKNOWN	0.57565	0.57565	0.07068	0.82143	0.4297	0.23485	0.00406	0.00452	0.00234	0.00889	0.00318	0.0026	0.03617	0.26441	0.00393	0.00535	0.66455	0.19485	0.535062
Q9SRT7	AT3G02210	COBL1	COBRA-like protein 1	?ER+TGN+GOLGI	UNKNOWN	UNKNOWN	UNKNOWN	UNKNOWN	0.61274	0.61274	0.06619	1	0.36033	0.24124	0.00408	0.00508	0.00181	0.00612	0.00455	0.0045	0.05479	0.30473	0.00858	0.00419	0.60157	0.11909	0.529929
Q9SGH5	AT3G01430	Q9SGH5	NHL domain protein	GOLGI+ER+pm?	UNKNOWN	UNKNOWN	GOLGI	ER	0	0.20494	0	0.58333	0.23081	0.56751	0.00516	0.00671	0.00441	0.00652	0.00435	0.00258	0.12786	0.01426	0.00599	0.02386	0.79832	0.3367	0.529526
Q9SR10	AT3G04640	Q9SR10	At3g04640	?ER+PM+GOLGI	UNKNOWN	UNKNOWN	UNKNOWN	UNKNOWN	0.60489	0.60489	0.14447	0.86905	0.38262	0.23566	0.00541	0.00814	0.00264	0.00599	0.00361	0.00373	0.26632	0.05656	0.00833	0.02098	0.61828	0.14696	0.527418
F4HSU3	AT1G20550	OFUT6	O-fucosyltransferase 6	GOLGI+ER	UNKNOWN	UNKNOWN	GOLGI	ER	0	0.0436	0	1	0.2418	0.66107	0.00506	0.00483	0.00279	0.00428	0.00332	0.00169	0.03349	0.02098	0.00742	0.01326	0.90287	0.41927	0.524324
A0A1P8AWL9	AT1G19970	A0A1P8AWL9	ER lumen protein retaining receptor family protein	GOLGI+ER+vacuole?	UNKNOWN	UNKNOWN	GOLGI	ER	0	0.25862	0	0.88095	0.21948	0.50933	0.00728	0.00407	0.03205	0.00599	0.00202	0.00219	0.06388	0.02701	0.00457	0.12213	0.72881	0.28985	0.517564
F4I1M5	AT1G36380	F4I1M5	Transmembrane protein	ER+GOLGI+pm?	UNKNOWN	UNKNOWN	ER	GOLGI	0.00038	0.33667	0.00038	0.61905	0.57762	0.22281	0.00565	0.00914	0.0038	0.00491	0.0075	0.00215	0.11674	0.01253	0.02809	0.00906	0.80043	0.35481	0.516429
Q9SRE4	AT1G76670	URGT1	UDP-rhamnose/UDP-galactose transporter 1	GOLGI+ER	UNKNOWN	UNKNOWN	GOLGI	ER	0	0.0631	0	1	0.22951	0.62655	0.00481	0.0038	0.00523	0.00684	0.00245	0.00216	0.04399	0.03113	0.00339	0.04014	0.85606	0.39704	0.51617
Q9FGY1	AT5G49360	BXL1	Beta-D-xylosidase 1	ER+GOLGI	UNKNOWN	UNKNOWN	ER	GOLGI	0	0.12264	0	1	0.66603	0.2373	0.00499	0.00658	0.00227	0.00394	0.00329	0.00208	0.03217	0.02915	0.00683	0.00536	0.90333	0.42873	0.516045
A0A1P8AN90	AT1G79520	A0A1P8AN90	Cation efflux family protein	?GOLGI+ER+VACUOLE	UNKNOWN	UNKNOWN	UNKNOWN	UNKNOWN	0.40128	0.40128	0.02706	0.83333	0.21782	0.48837	0.00558	0.00462	0.01657	0.01026	0.0025	0.00228	0.03036	0.00808	0.00541	0.20815	0.70619	0.27055	0.51513
Q9LFT2	AT5G15880	Q9LFT2	At5g15880	GOLGI+ER	UNKNOWN	UNKNOWN	GOLGI	ER	0	0.08029	0	1	0.23607	0.66854	0.00337	0.00468	0.00483	0.0461	0.00846	0.00233	0.00595	0.00661	0.00635	0.00673	0.90461	0.43247	0.513393
F4HV06	AT1G34550	EMB2756	Transmembrane protein	GOLGI+ER	UNKNOWN	UNKNOWN	GOLGI	ER	0	0.04375	0	1	0.22962	0.63873	0.00535	0.00534	0.02288	0.05467	0.00929	0.00249	0.00436	0.00734	0.01408	0.00583	0.86835	0.40911	0.513099
P40940	AT2G24765	ARF3	ADP-ribosylation factor 3	?ER+GOLGI+cytosol+pm?	UNKNOWN	UNKNOWN	UNKNOWN	UNKNOWN	0.64911	0.64911	0.10139	1	0.29735	0.24435	0.00738	0.00568	0.17942	0.03934	0.0029	0.00434	0.10654	0.01203	0.02989	0.07078	0.5417	0.053	0.51299
Q9SN84	AT3G47540	F1P2.90	At3g47540	?ER+TGN+GOLGI	UNKNOWN	UNKNOWN	UNKNOWN	UNKNOWN	0.58456	0.58456	0.01098	0.72619	0.40506	0.22164	0.00397	0.00528	0.00138	0.00542	0.00245	0.00247	0.01154	0.33198	0.00521	0.00359	0.6267	0.18342	0.511751
Q9ZW86	AT2G43080	P4H1	Prolyl 4-hydroxylase 1	GOLGI+ER	GOLGI	GOLGI CIS	GOLGI	ER	0	0.0174	0	1	0.24322	0.70547	0.0039	0.00387	0.00155	0.00745	0.00317	0.00201	0.00421	0.0172	0.00345	0.0045	0.94869	0.46225	0.510158
Q9ZWA4	AT1G03820	F11M21.25	At1g03820	?ER+GOLGI+unknown	UNKNOWN	UNKNOWN	UNKNOWN	UNKNOWN	0.52993	0.52993	0.07001	0.85714	0.38942	0.22257	0.01447	0.00356	0.04306	0.04013	0.00319	0.00539	0.01675	0.01744	0.15587	0.08815	0.61199	0.16685	0.509879
P35402	AT1G29330	ERD2A	ER lumen protein-retaining receptor A	ER+GOLGI	UNKNOWN	UNKNOWN	ER	GOLGI	2e-05	0.30317	2e-05	0.75	0.53543	0.21266	0.00684	0.00571	0.09863	0.06334	0.00365	0.00205	0.01836	0.02896	0.00736	0.01701	0.74809	0.32277	0.506629
Q9SB81	AT4G21960	PER42	Peroxidase 42	?GOLGI+PM+ER	UNKNOWN	UNKNOWN	UNKNOWN	UNKNOWN	0.51995	0.51995	0.09102	0.96429	0.2167	0.41212	0.00697	0.014	0.00327	0.00624	0.00716	0.00348	0.28975	0.01996	0.01338	0.00698	0.62882	0.19542	0.505936
P0C8Q4	AT4G19900	P0C8Q4	Uncharacterized protein At4g19900	GOLGI+ER	UNKNOWN	UNKNOWN	GOLGI	ER	0	0.0109	0	1	0.23863	0.70506	0.00397	0.00377	0.0028	0.01144	0.00231	0.00174	0.00332	0.01633	0.00503	0.0056	0.94369	0.46643	0.503525
Q9FI03	AT5G53730	NHL26	NDR1/HIN1-like protein 26	?ER+CHLOROPLAST+GOLGI	UNKNOWN	UNKNOWN	UNKNOWN	UNKNOWN	0.35276	0.35276	0.03848	1	0.50565	0.20679	0.00422	0.21872	0.00136	0.00707	0.00268	0.02321	0.00299	0.00938	0.01514	0.0028	0.71244	0.29886	0.49952
Q9FVX3	AT1G77350	Q9FVX3	At1g77350/F2P24_6	ER+GOLGI+chloroplast?	UNKNOWN	UNKNOWN	ER	GOLGI	0	0.09999	0	0.83333	0.61244	0.21177	0.00434	0.1262	0.00106	0.00352	0.00475	0.01345	0.00435	0.00736	0.0086	0.00215	0.82421	0.40067	0.493974
Q941L0	AT5G05170	CESA3	Cellulose synthase A catalytic subunit 3 [UDP-forming]	?PM+ER+GOLGI	UNKNOWN	UNKNOWN	UNKNOWN	UNKNOWN	0.57104	0.57104	0.12217	1	0.2581	0.24166	0.00582	0.00472	0.00439	0.01351	0.00348	0.00367	0.36301	0.07309	0.00306	0.02548	0.49976	0.01644	0.491544
A0A1I9LSN4	AT3G01170	A0A1I9LSN4	Ribosomal protein L34e superfamily protein	ER+GOLGI	UNKNOWN	UNKNOWN	ER	GOLGI	0	0.14572	0	0.5	0.63207	0.21089	0.00513	0.00423	0.03068	0.01776	0.00397	0.00159	0.03522	0.0216	0.00421	0.03266	0.84296	0.42118	0.487922
Q93ZX7	AT5G47780	GAUT4	Probable galacturonosyltransferase 4	GOLGI+ER	GOLGI	GOLGI CIS	GOLGI	ER	0	0.00711	0	1	0.22742	0.71693	0.00356	0.00422	0.00229	0.00619	0.00282	0.00222	0.00765	0.01407	0.00447	0.00817	0.94435	0.48951	0.482081
Q8H1E6	AT1G35510	OFUT9	O-fucosyltransferase 9	ER+GOLGI	UNKNOWN	UNKNOWN	ER	GOLGI	0	0.01882	0	1	0.71503	0.2217	0.00483	0.00671	0.00318	0.00742	0.00902	0.00595	0.00282	0.00782	0.01088	0.00463	0.93673	0.49333	0.474613
Q9FH28	AT5G49060	ATJ49	Chaperone protein dnaJ 49	?ER+golgi+extracellular?+unknown?	UNKNOWN	UNKNOWN	UNKNOWN	UNKNOWN	0.13435	0.13435	0.00178	0.86905	0.51412	0.18698	0.00458	0.01314	0.00924	0.12301	0.00546	0.00417	0.00492	0.01921	0.11096	0.00424	0.7011	0.32714	0.471742
Q9M2R0	AT3G57880	FTIP3	FT-interacting protein 3	?ER+golgi+pm?+chloroplast?	UNKNOWN	EXTRACELLULAR	UNKNOWN	UNKNOWN	0.45645	0.45645	0.01953	1	0.49991	0.18534	0.00626	0.11704	0.00264	0.00347	0.00479	0.00648	0.12792	0.00727	0.0346	0.00427	0.68525	0.31457	0.469691
Q93Z91	AT5G42660	AT5G42660.1	AT5g42660/MJB21_3	ER+GOLGI	UNKNOWN	UNKNOWN	ER	GOLGI	0	0.00547	0	1	0.72361	0.2204	0.00344	0.00426	0.00333	0.01005	0.00383	0.00161	0.00473	0.01464	0.00446	0.00563	0.94401	0.50321	0.468975
Q9LIK1	AT3G22950	ARFC1	ADP-ribosylation factor C1	?GOLGI+er+vacuole+cytosol?	UNKNOWN	UNKNOWN	UNKNOWN	UNKNOWN	0.57224	0.57224	0.06662	1	0.19219	0.38054	0.00869	0.00518	0.12137	0.01483	0.00332	0.0064	0.07691	0.00464	0.01458	0.17135	0.57273	0.18835	0.464856
Q38908	AT1G32170	XTH30	Probable xyloglucan endotransglucosylase/hydrolase protein 30	ER+TGN+golgi	UNKNOWN	UNKNOWN	ER	TGN	0.00066	0.46191	0.00066	1	0.46539	0.18131	0.00382	0.00378	0.00141	0.0068	0.00244	0.00292	0.01598	0.30698	0.00366	0.00551	0.6467	0.28408	0.462985
O80690	AT1G61820	BGLU46	Beta-glucosidase 46	ER+golgi+extracellular?	UNKNOWN	EXTRACELLULAR	ER	GOLGI	0	0.05209	0	1	0.57633	0.18273	0.00473	0.00532	0.00219	0.1173	0.0536	0.00399	0.00373	0.04164	0.00608	0.00234	0.75906	0.3936	0.460294
Q9SAH5	AT1G80860	PLMT	Phosphatidyl-N-methylethanolamine N-methyltransferase	GOLGI+er	UNKNOWN	UNKNOWN	GOLGI	ER	0	0.02739	0	0.85714	0.18114	0.59959	0.01942	0.00795	0.0066	0.00617	0.00817	0.05212	0.00349	0.00625	0.09716	0.01194	0.78073	0.41845	0.454034
Q9M0D2	AT4G30280	XTH18	Probable xyloglucan endotransglucosylase/hydrolase protein 18	?ER+TGN+golgi	UNKNOWN	EXTRACELLULAR	UNKNOWN	UNKNOWN	0.24052	0.24052	0.0012	1	0.54122	0.17361	0.00384	0.00421	0.00111	0.00725	0.00233	0.00296	0.00834	0.24955	0.00274	0.00283	0.71483	0.36761	0.452051
F4JTM2	AT4G38270	GAUT3	Hexosyltransferase	GOLGI+EXTRACELLULAR+er	UNKNOWN	UNKNOWN	GOLGI	EXTRACELLULAR	0.00044	0.14106	0.00044	0.64286	0.17356	0.57007	0.008	0.0058	0.00198	0.21208	0.00262	0.0034	0.00291	0.01256	0.00354	0.00346	0.74363	0.39651	0.448773
Q9SLT9	AT1G59590	ZCF37	At1g59590	ER+UNKNOWN+golgi	UNKNOWN	UNKNOWN	ER	UNKNOWN	0.0009	0.31028	0.0009	0.59524	0.47182	0.16761	0.00439	0.00683	0.00783	0.01083	0.00499	0.00301	0.04392	0.02255	0.2271	0.02913	0.63943	0.30421	0.444909
Q9LS42	AT3G18480	CASP	Protein CASP	GOLGI+er	GOLGI	UNKNOWN	GOLGI	ER	0	0.0039	0	1	0.18276	0.65049	0.00425	0.00435	0.02599	0.06824	0.02658	0.00252	0.01038	0.0064	0.00914	0.0089	0.83325	0.46773	0.443514
Q8L8Q7	AT3G29810	COBL2; COBL3	COBRA-like protein 2	GOLGI+TGN+er	UNKNOWN	UNKNOWN	GOLGI	TGN	0.0001	0.5657	0.0001	1	0.17483	0.38767	0.00426	0.00301	0.00184	0.00655	0.00246	0.0034	0.01981	0.38699	0.00307	0.00609	0.5625	0.21284	0.442777
O48670	AT4G39220	RER1A	Protein RER1A	ER+golgi	UNKNOWN	UNKNOWN	ER	GOLGI	0	0.03898	0	1	0.64933	0.17764	0.00452	0.00392	0.00375	0.00904	0.00238	0.00209	0.05246	0.07411	0.00248	0.0183	0.82697	0.47169	0.436897
Q39160	AT1G17580	XI-1	Myosin-5	?GOLGI+er+extracellular+unknown?	UNKNOWN	UNKNOWN	UNKNOWN	UNKNOWN	0.82009	0.82009	0.34667	1	0.19009	0.29866	0.03577	0.00668	0.03309	0.18673	0.00455	0.05892	0.00788	0.00536	0.13192	0.04035	0.48875	0.10857	0.435686
F4I543	AT1G56423	F4I543	Uncharacterized protein	?ER+pm+golgi	UNKNOWN	ER	UNKNOWN	UNKNOWN	0.26301	0.26301	0.00128	0.60714	0.59325	0.166	0.00532	0.01638	0.00227	0.00553	0.00645	0.00276	0.17365	0.01328	0.01008	0.00504	0.75925	0.42725	0.43486
Q94A16	AT2G47320	CYP21-3	Peptidyl-prolyl cis-trans isomerase CYP21-3, mitochondrial	GOLGI+er	GOLGI	GOLGI CIS	GOLGI	ER	0	0.001	0	1	0.19588	0.72913	0.00348	0.00376	0.00156	0.00773	0.0024	0.00195	0.01122	0.03075	0.00338	0.00877	0.92501	0.53325	0.431748
Q9FFK8	AT5G05660	NFXL2	NF-X1-type zinc finger protein NFXL2	?ER+golgi+pm?	UNKNOWN	UNKNOWN	UNKNOWN	UNKNOWN	0.156	0.156	0.00331	1	0.45053	0.15368	0.00633	0.00983	0.09295	0.08122	0.01692	0.00318	0.12047	0.00549	0.04691	0.01248	0.60421	0.29685	0.42485
Q7Y228	AT5G19740	LAMP1	Probable glutamate carboxypeptidase LAMP1	ER+golgi	UNKNOWN	UNKNOWN	ER	GOLGI	0	0.00542	0	1	0.74779	0.19505	0.00398	0.00488	0.00192	0.01433	0.00245	0.00125	0.00514	0.01456	0.00432	0.00433	0.94284	0.55274	0.421695
Q38910	AT4G25810	XTH23	Probable xyloglucan endotransglucosylase/hydrolase protein 23	ER+tgn+golgi	UNKNOWN	EXTRACELLULAR	ER	TGN	1e-05	0.02855	1e-05	1	0.60675	0.15614	0.00356	0.006	0.00086	0.02841	0.00185	0.00669	0.0032	0.1813	0.00381	0.00144	0.76289	0.45061	0.419124
Q9LTM2	AT3G26190	CYP71B21	Cytochrome P450 71B21	?ER+golgi+pm?	UNKNOWN	UNKNOWN	UNKNOWN	UNKNOWN	0.14428	0.14428	0.0095	1	0.64175	0.16036	0.0045	0.00947	0.00278	0.00523	0.00754	0.00204	0.13402	0.01189	0.01348	0.00694	0.80211	0.48139	0.415982
O64884	AT2G44500	OFUT20	O-fucosyltransferase 20	GOLGI+er	UNKNOWN	UNKNOWN	GOLGI	UNKNOWN	0.00096	0.00096	0	0.96429	0.17317	0.69452	0.00493	0.00422	0.00131	0.06845	0.00197	0.00248	0.00335	0.04028	0.00235	0.00297	0.86769	0.52135	0.41532
Q9FIH5	AT5G42420	URGT3	UDP-rhamnose/UDP-galactose transporter 3	GOLGI+er	UNKNOWN	UNKNOWN	GOLGI	ER	0	0.00243	0	1	0.16976	0.68317	0.00458	0.00515	0.00505	0.00427	0.00236	0.00244	0.03682	0.01045	0.00686	0.06908	0.85293	0.51341	0.415027
Q8VWI1	AT3G25040	ERD2B	ER lumen protein-retaining receptor B	GOLGI+er+cytosol?	UNKNOWN	ER	GOLGI	ER	1e-05	0.01958	1e-05	0.75	0.154	0.61393	0.0058	0.00387	0.10391	0.02108	0.00279	0.00152	0.01612	0.01598	0.01032	0.05068	0.76793	0.45993	0.414736
Q8VZV7	AT5G14430	Q8VZV7	Probable methyltransferase PMT9	GOLGI+er	UNKNOWN	GOLGI CIS	GOLGI	UNKNOWN	0.00038	0.00038	0	0.75	0.18507	0.73569	0.0033	0.00357	0.0014	0.02483	0.00237	0.00185	0.00497	0.03066	0.00241	0.00388	0.92076	0.55062	0.413771
Q9LRX9	AT3G24820	Q9LRX9	At3g24820	?GOLGI+CYTOSOL+extracellular+er	UNKNOWN	UNKNOWN	UNKNOWN	UNKNOWN	0.55616	0.55616	0.13969	0.88095	0.15844	0.35418	0.00648	0.00406	0.20403	0.17423	0.00354	0.00376	0.01607	0.03809	0.01204	0.02509	0.51262	0.19574	0.41228
Q38857	AT5G57560	XTH22	Xyloglucan endotransglucosylase/hydrolase protein 22	ER+TGN+golgi?	UNKNOWN	EXTRACELLULAR	ER	TGN	0	0.12033	0	1	0.58667	0.14532	0.00361	0.00435	0.00097	0.00856	0.00202	0.00379	0.00557	0.23378	0.00309	0.00227	0.73199	0.44135	0.408926
Q0WVZ1	AT3G03305	Q0WVZ1	Putative metallophosphoesterase At3g03305	ER+golgi	UNKNOWN	UNKNOWN	ER	UNKNOWN	0.00015	0.00015	0	1	0.75367	0.18652	0.00332	0.00447	0.00198	0.00903	0.0028	0.0015	0.0072	0.02029	0.00306	0.00616	0.94019	0.56715	0.406961
Q945Q1	AT5G12140	CYS1	Cysteine proteinase inhibitor 1	GOLGI+PM+er?	UNKNOWN	UNKNOWN	GOLGI	PM	9e-05	0.24606	9e-05	1	0.13645	0.49453	0.01056	0.00715	0.01271	0.0052	0.00365	0.00313	0.2326	0.00486	0.00531	0.08387	0.63098	0.35808	0.405039
O82245	AT2G47770	TSPO	Translocator protein homolog	?PM+ER+golgi	UNKNOWN	UNKNOWN	UNKNOWN	UNKNOWN	0.46825	0.46825	0.00119	0.77381	0.28161	0.17192	0.00665	0.0089	0.00277	0.00786	0.00597	0.00274	0.47012	0.02656	0.00825	0.00666	0.45353	0.10969	0.403782
Q9FZ29	AT1G02310	MAN1	Mannan endo-1,4-beta-mannosidase 1	ER+EXTRACELLULAR+golgi?	UNKNOWN	UNKNOWN	ER	EXTRACELLULAR	1e-05	0.36565	1e-05	0.97619	0.47977	0.1354	0.00475	0.00556	0.00138	0.29081	0.00306	0.00355	0.00714	0.06357	0.00256	0.00245	0.61517	0.34437	0.403324
Q9SGN8	AT1G28400	Q9SGN8	F3M18.16	?GOLGI+unknown+er?	UNKNOWN	UNKNOWN	UNKNOWN	UNKNOWN	0.31679	0.31679	0.0182	1	0.13773	0.43627	0.01588	0.00462	0.09046	0.02198	0.00365	0.02931	0.01459	0.00725	0.18743	0.05084	0.574	0.29854	0.402638
Q9SZT0	AT4G35820	P4H11	Probable prolyl 4-hydroxylase 11	GOLGI+er	UNKNOWN	UNKNOWN	GOLGI	ER	0	0.00207	0	0.88095	0.16818	0.71261	0.00638	0.00435	0.00162	0.08145	0.00276	0.00259	0.00305	0.01017	0.00301	0.00382	0.88079	0.54443	0.401262
F4JPE9	AT4G23950	SUN5	SUN domain-containing protein 5	?ER+chloroplast+unknown+golgi?	UNKNOWN	UNKNOWN	UNKNOWN	UNKNOWN	0.31699	0.31699	0.03231	0.75	0.49175	0.13239	0.00277	0.17986	0.00285	0.00816	0.00355	0.00232	0.0071	0.00607	0.16063	0.00256	0.62414	0.35936	0.399849
Q9C5D3	AT5G63530	HIPP07	Heavy metal-associated isoprenylated plant protein 7	?CHLOROPLAST+GOLGI+er	UNKNOWN	UNKNOWN	UNKNOWN	UNKNOWN	0.5583	0.5583	0.05499	1	0.17384	0.26579	0.00519	0.38844	0.00328	0.00294	0.00435	0.01001	0.05536	0.00659	0.08015	0.00407	0.43963	0.09195	0.399206
Q9FH36	AT5G54690	GAUT12	Probable galacturonosyltransferase 12	?ER+EXTRACELLULAR+golgi?+nucleus?	UNKNOWN	UNKNOWN	UNKNOWN	UNKNOWN	0.5784	0.5784	0.00318	0.5	0.42269	0.13249	0.00476	0.00618	0.00124	0.2366	0.11024	0.00882	0.00304	0.06385	0.00824	0.00186	0.55518	0.2902	0.394067
Q9LVD6	AT5G57220	CYP81F2	Cytochrome P450 81F2	?ER+UNKNOWN+golgi?+extracellular?	UNKNOWN	UNKNOWN	UNKNOWN	UNKNOWN	0.50968	0.50968	0.08872	0.5119	0.3983	0.13583	0.01695	0.00847	0.02641	0.12601	0.00799	0.04653	0.00574	0.00884	0.20916	0.00978	0.53413	0.26247	0.393937
Q7Y030	AT4G24530	OFUT31	O-fucosyltransferase 31	GOLGI+er	GOLGI	GOLGI CIS	GOLGI	UNKNOWN	0.00028	0.00028	0	1	0.18181	0.76736	0.00367	0.00373	0.00172	0.00629	0.00265	0.00195	0.00653	0.01326	0.00413	0.0069	0.94917	0.58555	0.393384
P43296	AT4G39090	RD19A	Cysteine protease RD19A	ER+EXTRACELLULAR+golgi?	UNKNOWN	UNKNOWN	ER	EXTRACELLULAR	0	0.15724	0	1	0.5669	0.13	0.0043	0.00581	0.00748	0.24459	0.00448	0.00259	0.00633	0.01706	0.00503	0.00544	0.6969	0.4369	0.392424
Q9LFL0	AT5G16910	CSLD2	Cellulose synthase-like protein D2	TGN+ER+golgi?	ER	ER	TGN	ER	0	0.45045	0	1	0.35327	0.14315	0.00318	0.00286	0.00198	0.01195	0.00219	0.00308	0.01478	0.45574	0.00357	0.00425	0.49642	0.21012	0.392112
Q8L9S0	AT1G29060	Q8L9S0	Bet1-like protein At1g29060	ER+PM+golgi?	UNKNOWN	GOLGI CIS	ER	PM	0	0.45059	0	1	0.47342	0.12675	0.00536	0.01014	0.00412	0.00664	0.00426	0.00237	0.30088	0.01655	0.02952	0.01999	0.60017	0.34667	0.392109
Q9FMQ5	AT5G22460	MWD9.26	Alpha/beta-Hydrolases superfamily protein	ER+golgi?	UNKNOWN	UNKNOWN	ER	GOLGI	1e-05	0.01579	1e-05	1	0.64654	0.14282	0.00439	0.01484	0.00274	0.00361	0.00254	0.00217	0.08768	0.00773	0.00619	0.07874	0.78936	0.50372	0.391744
Q9XHZ7	AT1G21790	Q9XHZ7	F8K7.23	PM+ER+golgi	UNKNOWN	UNKNOWN	PM	ER	0.00091	0.3948	0.00091	0.84524	0.26542	0.16687	0.00657	0.01032	0.00429	0.01214	0.01197	0.00249	0.48481	0.01181	0.01676	0.00655	0.43229	0.09855	0.389688
A0A1P8ASV0	AT1G70630	RAY1	Nucleotide-diphospho-sugar transferase family protein	GOLGI+er	UNKNOWN	UNKNOWN	GOLGI	UNKNOWN	0.00042	0.00042	0	1	0.17123	0.74754	0.00302	0.00371	0.00318	0.00879	0.00201	0.00175	0.01228	0.02746	0.00513	0.0139	0.91877	0.57631	0.389274
O64379	AT1G22750	O64379	AT1G22750 protein	?VACUOLE+GOLGI+er	UNKNOWN	UNKNOWN	UNKNOWN	UNKNOWN	0.38513	0.38513	0.02318	1	0.17786	0.23382	0.00515	0.0042	0.00626	0.00883	0.00252	0.0025	0.07559	0.01161	0.00502	0.46663	0.41168	0.05596	0.388642
A0A1P8AS52	AT1G01490	A0A1P8AS52	Heavy metal transport/detoxification superfamily protein	PM+GOLGI+er?	UNKNOWN	UNKNOWN	PM	GOLGI	0.0005	0.52559	0.0005	0.61905	0.145	0.33363	0.00672	0.00903	0.00489	0.00863	0.01067	0.00302	0.43899	0.01738	0.01407	0.00797	0.47863	0.18863	0.388346
Q9SWS1	AT5G38630	CYB561B	Transmembrane ascorbate ferrireductase 2	ER+golgi	UNKNOWN	UNKNOWN	ER	GOLGI	0	0.00395	0	0.9881	0.72532	0.16201	0.00939	0.05564	0.00115	0.00653	0.00328	0.01831	0.00157	0.0071	0.00756	0.00215	0.88733	0.56331	0.387488
A0A1I9LNS1	AT3G63340	MAA21.3	Kinase superfamily protein	ER+golgi	UNKNOWN	UNKNOWN	ER	GOLGI	0	0.04379	0	0.7381	0.69974	0.15299	0.00464	0.00868	0.00434	0.06174	0.00759	0.00774	0.00615	0.00754	0.03528	0.00356	0.85273	0.54675	0.3865
Q2EF88	AT5G53550	YSL3	Metal-nicotianamine transporter YSL3	ER+pm+golgi?	UNKNOWN	UNKNOWN	ER	PM	1e-05	0.03183	1e-05	1	0.59786	0.1288	0.00409	0.00593	0.00267	0.01132	0.00468	0.00298	0.17015	0.06031	0.00444	0.00676	0.72666	0.46906	0.385813
Q94BY4	AT5G35570	OFUT35	O-fucosyltransferase 35	ER+golgi	ER	ER	ER	UNKNOWN	0.00035	0.00035	0	1	0.77284	0.17777	0.00325	0.00478	0.0022	0.00888	0.00554	0.00208	0.00378	0.00981	0.00441	0.00466	0.95061	0.59507	0.384931
Q0WV13	AT3G01040	GAUT13	Probable galacturonosyltransferase 13	GOLGI+er	UNKNOWN	UNKNOWN	GOLGI	UNKNOWN	0.00013	0.00013	0	0.88095	0.17179	0.75992	0.00365	0.00282	0.00245	0.02104	0.00307	0.00174	0.0038	0.01982	0.00464	0.00525	0.93171	0.58813	0.383743
Q6R8G5	AT2G03240	PHO1-H5	Phosphate transporter PHO1 homolog 5	?GOLGI+EXTRACELLULAR+tgn+er?	UNKNOWN	UNKNOWN	UNKNOWN	UNKNOWN	0.53876	0.53876	0.05948	1	0.13052	0.38217	0.00314	0.00414	0.00436	0.23445	0.00555	0.00414	0.00313	0.18588	0.04107	0.00147	0.51269	0.25165	0.383672
Q9SD88	AT5G07960	Q9SD88	Protein Asterix	GOLGI+er?+unknown?	UNKNOWN	UNKNOWN	GOLGI	ER	0	0.00705	0	0.75	0.13717	0.65349	0.00456	0.02923	0.0025	0.0063	0.02899	0.02156	0.00217	0.00495	0.106	0.00309	0.79066	0.51632	0.382426
Q84W75	AT1G29090	Q84W75	Cysteine proteinases superfamily protein	GOLGI+er?+chloroplast?	UNKNOWN	UNKNOWN	UNKNOWN	UNKNOWN	0.05942	0.05942	0.00238	1	0.12436	0.59012	0.009	0.10998	0.00121	0.00433	0.00362	0.08705	0.00632	0.05396	0.00808	0.00196	0.71448	0.46576	0.381704
O65638	AT4G36010	O65638	Pathogenesis-related thaumatin superfamily protein	?ER+unknown?+golgi?+peroxisome?	UNKNOWN	UNKNOWN	UNKNOWN	UNKNOWN	0.20916	0.20916	0.03431	0.9881	0.50565	0.11715	0.00284	0.03134	0.00169	0.04372	0.02141	0.1103	0.0037	0.04319	0.11794	0.00107	0.6228	0.3885	0.380842
F4IVN6	AT2G27030	CAM5	Calmodulin 5	?ER+EXTRACELLULAR+golgi?+cytosol?	UNKNOWN	UNKNOWN	UNKNOWN	UNKNOWN	0.71649	0.71649	0.18675	0.7381	0.31338	0.14383	0.00886	0.00646	0.10595	0.22168	0.0079	0.00888	0.07501	0.00405	0.01093	0.09308	0.45721	0.16955	0.37969
Q9LTM3	AT3G26180	CYP71B20	Cytochrome P450 71B20	ER+PM+golgi?	UNKNOWN	ER	ER	PM	0	0.44849	0	1	0.50376	0.11502	0.00642	0.01067	0.00463	0.00823	0.00552	0.00228	0.31799	0.01512	0.00582	0.00454	0.61878	0.38874	0.378235
A0A1P8BHW3	AT5G45560	MFC19.23	Pleckstrin homology	?ER+VACUOLE+golgi?	UNKNOWN	UNKNOWN	UNKNOWN	UNKNOWN	0.45178	0.45178	0.00324	0.5119	0.42092	0.11935	0.011	0.00505	0.05357	0.01661	0.00545	0.03612	0.03666	0.00448	0.07206	0.21872	0.54027	0.30157	0.377341
Q9FXC1	AT1G56710	PGL1	Pectin lyase-like superfamily protein	ER+golgi	UNKNOWN	UNKNOWN	ER	UNKNOWN	0.00051	0.00051	0	1	0.75327	0.16327	0.00348	0.00416	0.00284	0.00515	0.00187	0.00196	0.00941	0.04219	0.00482	0.00757	0.91654	0.59	0.375781
Q9C975	AT1G80290	Q9C975	Glycosyltransferase family protein 64 C3	GOLGI+EXTRACELLULAR+er?	UNKNOWN	UNKNOWN	GOLGI	EXTRACELLULAR	3e-05	0.08874	3e-05	1	0.12125	0.60535	0.00388	0.00752	0.01686	0.20466	0.00839	0.00199	0.00415	0.01245	0.01074	0.00275	0.7266	0.4841	0.374853
Q8L776	AT3G51610	NPU	ATP-dependent helicase/deoxyribonuclease subunit B	ER+golgi	UNKNOWN	UNKNOWN	ER	UNKNOWN	0.00018	0.00018	0	1	0.75771	0.16315	0.00375	0.00371	0.00459	0.02415	0.00275	0.00153	0.0083	0.01839	0.00331	0.00865	0.92086	0.59456	0.373353
Q41906	AT2G40880	CYS3	Cysteine proteinase inhibitor 3	?ER+PM+tgn+golgi?	UNKNOWN	UNKNOWN	UNKNOWN	UNKNOWN	0.60986	0.60986	0.01377	0.7381	0.35041	0.12862	0.00485	0.00596	0.0032	0.01283	0.00772	0.00403	0.29883	0.17233	0.0067	0.00451	0.47903	0.22179	0.372786
Q9ASU8	AT5G11790	NDL2	Protein NDL2	?GOLGI+EXTRACELLULAR+unknown+er?	UNKNOWN	UNKNOWN	UNKNOWN	UNKNOWN	0.50486	0.50486	0.09067	0.64286	0.11953	0.39449	0.00774	0.00447	0.01528	0.24966	0.00395	0.00924	0.00642	0.01929	0.16067	0.00925	0.51402	0.27496	0.372685
O04342	AT2G30530	MADA4	At2g30530/T6B20.12	?CYTOSOL+ER+golgi	UNKNOWN	UNKNOWN	UNKNOWN	UNKNOWN	0.43299	0.43299	0.07697	0.97619	0.20268	0.17801	0.00799	0.00452	0.3879	0.0939	0.00474	0.00298	0.03697	0.0113	0.01205	0.05696	0.38069	0.02467	0.371298
O49362	AT4G32290	O49362	At4g32290	?GOLGI+unknown?+tgn?+er?	UNKNOWN	UNKNOWN	UNKNOWN	UNKNOWN	0.15823	0.15823	0.01596	0.63095	0.10968	0.52785	0.00404	0.05305	0.00195	0.00336	0.00217	0.00504	0.00648	0.13287	0.14941	0.0041	0.63753	0.41817	0.370934
Q9LFG3	AT3G53560	F4P12_260	Tetratricopeptide repeat	?GOLGI+CHLOROPLAST+er?	UNKNOWN	UNKNOWN	UNKNOWN	UNKNOWN	0.24384	0.24384	0.00727	1	0.10874	0.46248	0.00338	0.20178	0.00685	0.0942	0.00554	0.07198	0.00479	0.00726	0.02945	0.00355	0.57122	0.35374	0.369157
F4JZL7	AT5G19090	HIPP33	Heavy metal-associated isoprenylated plant protein 33	?CHLOROPLAST+ER+golgi	UNKNOWN	UNKNOWN	UNKNOWN	UNKNOWN	0.49246	0.49246	0.11825	1	0.23623	0.16156	0.00433	0.4186	0.00316	0.00362	0.00561	0.06893	0.05611	0.00734	0.02987	0.00463	0.39779	0.07467	0.368087
A0A178VYC5	AT2G01660	PDLP6	Plasmodesmata-located protein 6	?CHLOROPLAST+ER+UNKNOWN+golgi	UNKNOWN	UNKNOWN	UNKNOWN	UNKNOWN	0.72428	0.72428	0.37116	1	0.23353	0.16254	0.003	0.30486	0.00337	0.00475	0.00634	0.00272	0.05697	0.00879	0.21017	0.00297	0.39607	0.07099	0.367953
F4IXC9	AT3G14860	F4IXC9	NHL domain-containing protein	ER+golgi	UNKNOWN	UNKNOWN	ER	GOLGI	0	0.01189	0	0.7381	0.74184	0.15145	0.00361	0.02326	0.00222	0.00309	0.00378	0.00201	0.02144	0.00942	0.03434	0.00354	0.89329	0.59039	0.365901
Q6NMJ6	AT1G03260	Q6NMJ6	At1g03260	EXTRACELLULAR+ER+golgi?	UNKNOWN	UNKNOWN	EXTRACELLULAR	ER	0	0.36271	0	1	0.30381	0.13384	0.01111	0.01429	0.00473	0.48901	0.00267	0.00956	0.00364	0.007	0.0144	0.00592	0.43765	0.16997	0.363263
Q8S926	AT2G45170	ATG8E	Autophagy-related protein 8e	?PM+er+golgi+tgn?	UNKNOWN	VACUOLE	UNKNOWN	UNKNOWN	0.33232	0.33232	0.01956	0.60714	0.17941	0.17895	0.00646	0.00492	0.005	0.01512	0.00514	0.00418	0.46042	0.12852	0.00473	0.00716	0.35836	0.00046	0.358195
Q94CG2	AT4G14455	BET12	Bet1-like SNARE 1-2	GOLGI+er	UNKNOWN	UNKNOWN	GOLGI	UNKNOWN	7e-05	7e-05	0	1	0.15778	0.77338	0.00275	0.00296	0.00287	0.01497	0.00727	0.00204	0.00732	0.01992	0.00415	0.0046	0.93116	0.6156	0.357938
Q9LQT4	AT1G75800	Q9LQT4	At1g75800/T4O12_2	?NUCLEUS+GOLGI+er?	UNKNOWN	UNKNOWN	UNKNOWN	UNKNOWN	0.30906	0.30906	0.00162	0.65476	0.14253	0.26355	0.00495	0.00929	0.00134	0.00633	0.52339	0.00536	0.00235	0.00886	0.02983	0.00222	0.40608	0.12102	0.356936
F4K498	AT5G27330	F4K498	Prefoldin chaperone subunit family protein	ER+golgi?	UNKNOWN	GOLGI CIS	ER	UNKNOWN	0.00033	0.00033	0	1	0.68157	0.12379	0.01569	0.01473	0.00229	0.02521	0.02205	0.08962	0.00168	0.00746	0.01309	0.00282	0.80536	0.55778	0.356146
Q9C8C9	AT1G66180	Q9C8C9	Eukaryotic aspartyl protease family protein	?ER+unknown+extracellular+golgi?	UNKNOWN	UNKNOWN	UNKNOWN	UNKNOWN	0.49715	0.49715	0.098	0.7619	0.36734	0.11122	0.00721	0.00579	0.05988	0.15808	0.00474	0.00698	0.04581	0.01287	0.1825	0.03759	0.47856	0.25612	0.355991
F4KDC7	AT5G51710	KEA5	K+ efflux antiporter 5	GOLGI+er?	UNKNOWN	UNKNOWN	GOLGI	UNKNOWN	0.00074	0.00074	0	0.60714	0.13643	0.72242	0.00517	0.0724	0.00114	0.00547	0.00328	0.01251	0.00208	0.00853	0.02853	0.00203	0.85885	0.58599	0.355572
Q9LK26	AT3G27270	Q9LK26	At3g27270	ER+golgi?	UNKNOWN	UNKNOWN	ER	GOLGI	0	0.0153	0	0.5	0.71521	0.13137	0.00349	0.00726	0.00265	0.00561	0.00942	0.00171	0.08347	0.01471	0.01941	0.00569	0.84658	0.58384	0.352313
F4KF16	AT5G64600	OFUT38	O-fucosyltransferase 38	GOLGI+er?	UNKNOWN	UNKNOWN	GOLGI	UNKNOWN	5e-05	5e-05	0	1	0.13667	0.73143	0.00365	0.00384	0.00255	0.09231	0.00501	0.00208	0.0034	0.01115	0.00419	0.00372	0.8681	0.59476	0.351789
Q8RWM6	AT1G21900	Q8RWM6	Transmembrane emp24 domain-containing protein p24delta5	ER+golgi?	ER	ER	ER	UNKNOWN	2e-05	2e-05	0	1	0.77106	0.14989	0.0033	0.004	0.00346	0.00703	0.00219	0.00143	0.01442	0.02598	0.00356	0.01369	0.92095	0.62117	0.348883
O04083	AT1G11090	MAGL1	Alpha/beta-Hydrolases superfamily protein	?ER+VACUOLE+golgi?+pm?	UNKNOWN	UNKNOWN	UNKNOWN	UNKNOWN	0.68334	0.68334	0.05134	1	0.3054	0.12111	0.00859	0.00538	0.08912	0.01835	0.0034	0.03257	0.10356	0.00591	0.03903	0.26756	0.42651	0.18429	0.347908
F4JRY9	AT4G31340	F4JRY9	Myosin heavy chain-like protein	ER+golgi	UNKNOWN	UNKNOWN	ER	GOLGI	0	0.01609	0	0.5	0.78434	0.15396	0.0032	0.0052	0.00241	0.00448	0.00343	0.0013	0.01497	0.018	0.00444	0.00426	0.9383	0.63038	0.346814
F4IFT7	AT2G27389	F4IFT7	Glycine-rich protein	ER+golgi?	UNKNOWN	UNKNOWN	ER	UNKNOWN	8e-05	8e-05	0	0.91667	0.72474	0.13025	0.00377	0.00526	0.0074	0.01255	0.00252	0.00175	0.04855	0.05403	0.00406	0.00511	0.85499	0.59449	0.346707
Q9FKM0	AT5G57510	MUA2.8	Cotton fiber protein	?PEROXISOME+GOLGI+er?	UNKNOWN	UNKNOWN	UNKNOWN	UNKNOWN	0.25637	0.25637	0.04764	0.52381	0.14968	0.2226	0.01839	0.00458	0.00755	0.03039	0.00703	0.49723	0.00672	0.01613	0.03088	0.00882	0.37228	0.07292	0.345133
F4IWG2	AT3G27325	F4IWG2	GPI inositol-deacylase	ER+golgi	UNKNOWN	UNKNOWN	ER	UNKNOWN	6e-05	6e-05	0	1	0.79732	0.15802	0.00376	0.00537	0.00166	0.00414	0.00358	0.00219	0.00572	0.0095	0.00397	0.00478	0.95534	0.6393	0.344591
Q94JQ6	AT5G64740	CESA6	Cellulose synthase A catalytic subunit 6 [UDP-forming]	ER+golgi?+tgn?	UNKNOWN	UNKNOWN	ER	GOLGI	0	0.00404	0	1	0.64971	0.1036	0.00363	0.00334	0.00287	0.01172	0.00225	0.0028	0.06962	0.10307	0.0032	0.04418	0.75331	0.54611	0.34192
Q38921	AT5G52210	GB1	At5g52210	TGN+ER+golgi?	UNKNOWN	UNKNOWN	TGN	ER	0.00011	0.20141	0.00011	1	0.22002	0.1481	0.00359	0.00219	0.01234	0.06399	0.00158	0.00335	0.00799	0.52762	0.00545	0.00377	0.36812	0.07192	0.341645
Q944G5	AT3G47960	NPF2.10	Protein NRT1/ PTR FAMILY 2.10	PM+GOLGI+er?	UNKNOWN	UNKNOWN	PM	GOLGI	0	0.42804	0	1	0.10019	0.35821	0.00851	0.00779	0.0035	0.0078	0.00375	0.00315	0.47162	0.0109	0.00341	0.02117	0.4584	0.25802	0.340124
O82244	AT2G47760	ALG3	Dol-P-Man:Man(5)GlcNAc(2)-PP-Dol alpha-1,3-mannosyltransferase	ER+golgi?	UNKNOWN	UNKNOWN	ER	UNKNOWN	0.00022	0.00022	0	1	0.78065	0.14543	0.02452	0.00492	0.00247	0.00419	0.00215	0.00245	0.00403	0.00596	0.01006	0.01316	0.92608	0.63522	0.337815
Q9FG35	AT5G06700	TBR	Protein trichome birefringence	TGN+GOLGI+er?	UNKNOWN	UNKNOWN	TGN	GOLGI	0	0.31197	0	1	0.1053	0.32695	0.00339	0.00259	0.00134	0.02554	0.00184	0.00279	0.00273	0.52252	0.00295	0.00206	0.43225	0.22165	0.336442
Q9LZF1	AT5G03380	HIPP06	Heavy metal-associated isoprenylated plant protein 6	?ER+PM+chloroplast+unknown?+golgi?	UNKNOWN	UNKNOWN	UNKNOWN	UNKNOWN	0.75012	0.75012	0.2359	1	0.25532	0.12916	0.00317	0.16304	0.00854	0.01099	0.00742	0.01905	0.24856	0.00581	0.14193	0.00701	0.38448	0.12616	0.335974
O80924	AT2G37540	O80924	NAD(P)-binding Rossmann-fold superfamily protein	VACUOLE+golgi+er	UNKNOWN	UNKNOWN	UNKNOWN	UNKNOWN	0.08357	0.08357	0.00848	1	0.16588	0.16805	0.00707	0.00428	0.01186	0.00956	0.00301	0.00549	0.02811	0.00512	0.04021	0.55136	0.33393	0.00217	0.333205
A0JJX5	AT5G11100	SYT4	Synaptotagmin-4	PM+ER+golgi?	UNKNOWN	UNKNOWN	PM	ER	0	0.26304	0	1	0.30172	0.10888	0.00642	0.00673	0.00373	0.01207	0.005	0.00297	0.52914	0.01258	0.00331	0.00744	0.4106	0.19284	0.33142
Q9SK39	AT2G24940	MP3	Probable steroid-binding protein 3	CYTOSOL+GOLGI+er?	UNKNOWN	UNKNOWN	CYTOSOL	GOLGI	0.00035	0.13026	0.00035	1	0.14291	0.21064	0.00927	0.00569	0.55947	0.02148	0.0034	0.00347	0.01406	0.00953	0.01059	0.00949	0.35355	0.06773	0.329604
Q9LIL4	AT3G22845	Q9LIL4	Transmembrane emp24 domain-containing protein p24beta3	ER+golgi?	UNKNOWN	UNKNOWN	ER	UNKNOWN	2e-05	2e-05	0	1	0.77695	0.13664	0.00364	0.00376	0.00481	0.01049	0.00244	0.00143	0.01891	0.0162	0.00316	0.02157	0.91359	0.64031	0.328609
Q9FKV1	AT5G44370	ANTR5	Probable anion transporter 5	ER+golgi?	UNKNOWN	UNKNOWN	ER	UNKNOWN	4e-05	4e-05	0	0.88095	0.76951	0.12973	0.00404	0.00362	0.00672	0.02481	0.00296	0.00148	0.00437	0.04135	0.00524	0.00618	0.89924	0.63978	0.323924
Q9S9L9	AT1G16180	Q9S9L9	Serinc-domain containing serine and sphingolipid biosynthesis protein	?VACUOLE+ER+golgi?	UNKNOWN	UNKNOWN	UNKNOWN	UNKNOWN	0.38889	0.38889	0.00717	0.85714	0.22745	0.12086	0.0073	0.00404	0.00499	0.06414	0.00366	0.00413	0.0811	0.04252	0.0033	0.43651	0.34831	0.10659	0.311184
Q8VY92	AT1G69460	Q8VY92	Transmembrane emp24 domain-containing protein p24delta10	ER+golgi?	ER	ER	ER	UNKNOWN	0	0	0	1	0.79111	0.12921	0.00336	0.00354	0.00413	0.00867	0.00204	0.00139	0.01286	0.02537	0.00325	0.01508	0.92032	0.6619	0.31116
F4K020	AT5G42100	BG_PPAP	glucan endo-1,3-beta-D-glucosidase	?EXTRACELLULAR+CHLOROPLAST+er+golgi	UNKNOWN	UNKNOWN	UNKNOWN	UNKNOWN	0.6545	0.6545	0.13141	0.86905	0.1564	0.15032	0.0037	0.27242	0.001	0.38201	0.00451	0.0159	0.00364	0.00567	0.00334	0.00108	0.30672	0.00608	0.304855
Q940H3	AT3G54260	TBL36	Protein trichome birefringence-like 36	?UNKNOWN+GOLGI+extracellular?+er?	UNKNOWN	UNKNOWN	UNKNOWN	UNKNOWN	0.55345	0.55345	0.12777	1	0.10398	0.2519	0.01202	0.00405	0.01499	0.10967	0.00309	0.03486	0.00854	0.01924	0.42956	0.00811	0.35588	0.14792	0.303238
Q9LNP3	AT1G17620	Q9LNP3	At1g17620/F11A6_23	PM+ER+golgi?	UNKNOWN	UNKNOWN	PM	ER	0	0.09936	0	1	0.23985	0.10762	0.00614	0.00901	0.0021	0.01088	0.00545	0.00657	0.59285	0.00761	0.00482	0.00708	0.34747	0.13223	0.301524
Q9FVU0	AT1G57620	CYB	Transmembrane emp24 domain-containing protein p24delta4	ER+golgi?	UNKNOWN	UNKNOWN	ER	UNKNOWN	0	0	0	1	0.79102	0.12093	0.00401	0.00421	0.01701	0.01477	0.00272	0.00139	0.01003	0.01375	0.00633	0.01383	0.91195	0.67009	0.300861
Q9ZRD6	AT5G58060	YKT61	VAMP-like protein YKT61	ER+golgi?	ER	ER	ER	UNKNOWN	2e-05	2e-05	0	0.86905	0.74893	0.10132	0.00465	0.00449	0.02552	0.03855	0.00353	0.00183	0.04198	0.01917	0.00408	0.00595	0.85025	0.64761	0.29962
Q9FKY5	AT5G65970	MLO10	MLO-like protein 10	?EXTRACELLULAR+TGN+golgi+er?	UNKNOWN	UNKNOWN	UNKNOWN	UNKNOWN	0.60175	0.60175	0.02598	0.85714	0.14118	0.16278	0.0046	0.00309	0.00167	0.41584	0.00352	0.00448	0.00419	0.25415	0.00295	0.00156	0.30396	0.0216	0.297394
Q9SUK6	AT4G16790	dl4420c	AT4g16790/dl4420c	PM+er+golgi?	UNKNOWN	UNKNOWN	PM	ER	0	0.01394	0	1	0.18732	0.12838	0.00693	0.00709	0.00327	0.00896	0.00504	0.00291	0.62692	0.0088	0.00333	0.01105	0.3157	0.05894	0.297093
Q9XIC5	AT1G34190	NAC017	NAC domain-containing protein 17	PM+ER+golgi?	UNKNOWN	UNKNOWN	PM	ER	1e-05	0.35463	1e-05	0.86905	0.23754	0.10294	0.00773	0.00991	0.01372	0.05264	0.06529	0.00387	0.48205	0.00882	0.01249	0.00301	0.34048	0.1346	0.294651
Q9SUZ8	AT3G52060	GNTL	At3g52060	EXTRACELLULAR+GOLGI+er?	UNKNOWN	UNKNOWN	EXTRACELLULAR	GOLGI	0.00021	0.17254	0.00021	0.60714	0.10544	0.22765	0.0035	0.00379	0.00242	0.58595	0.01485	0.00271	0.00451	0.04148	0.00584	0.00185	0.33309	0.12221	0.292383
B0F9L7	AT1G18190	GC2	Golgin candidate 2	GOLGI+er?	GOLGI	UNKNOWN	GOLGI	UNKNOWN	0	0	0	1	0.12549	0.81583	0.0026	0.00275	0.00301	0.01502	0.00359	0.00195	0.00579	0.01104	0.00554	0.00739	0.94132	0.69034	0.291489
Q9SL43	AT2G18030	MSRA5	Peptide methionine sulfoxide reductase A5	GOLGI+er?	UNKNOWN	UNKNOWN	GOLGI	UNKNOWN	0	0	0	1	0.12653	0.8216	0.00302	0.00285	0.00257	0.01273	0.00281	0.00168	0.00334	0.01428	0.0045	0.00411	0.94813	0.69507	0.289113
Q9M7I7	AT5G43860	CLH2	Chlorophyllase-2	?UNKNOWN+er+peroxisome+golgi?	UNKNOWN	UNKNOWN	UNKNOWN	UNKNOWN	0.76612	0.76612	0.27487	1	0.19971	0.11369	0.01678	0.00858	0.05948	0.08051	0.00508	0.1928	0.01472	0.00966	0.28473	0.01426	0.3134	0.08602	0.286441
F4JLQ2	AT4G16180	DL4130C	Transmembrane protein	ER+golgi?	UNKNOWN	UNKNOWN	ER	UNKNOWN	0	0	0	1	0.8224	0.12235	0.00309	0.00364	0.00387	0.00926	0.00316	0.00132	0.00604	0.01294	0.00429	0.00764	0.94475	0.70005	0.283378
F4JEJ0	AT3G13790	ATBFRUCT1	Glycosyl hydrolases family 32 protein	EXTRACELLULAR+golgi+er?	UNKNOWN	UNKNOWN	EXTRACELLULAR	GOLGI	1e-05	0.03738	1e-05	0.7381	0.12404	0.16043	0.00448	0.0054	0.0039	0.60166	0.06744	0.00303	0.00566	0.01199	0.0082	0.00377	0.28447	0.03639	0.274118
Q8GYI7	AT5G19630	Q8GYI7	Alpha/beta-Hydrolases superfamily protein	?VACUOLE+er+pm+golgi?	UNKNOWN	UNKNOWN	UNKNOWN	UNKNOWN	0.36265	0.36265	0.12261	1	0.1902	0.10673	0.00586	0.0047	0.0194	0.02871	0.00374	0.00361	0.18592	0.00423	0.00416	0.44275	0.29693	0.08347	0.272145
O23298	AT4G14420	dl3250c	AT4g14420/dl3250c	ER+golgi?	UNKNOWN	UNKNOWN	ER	UNKNOWN	0.00085	0.00085	0	0.84524	0.82292	0.11232	0.00483	0.00858	0.00112	0.0271	0.0052	0.00414	0.00271	0.0048	0.00363	0.00265	0.93524	0.7106	0.270658
Q9FF75	AT5G04990	SUN1	SUN domain-containing protein 1	NUCLEUS+golgi+er?	UNKNOWN	UNKNOWN	NUCLEUS	GOLGI	0.00015	0.0592	0.00015	1	0.10504	0.18075	0.01287	0.01314	0.00152	0.012	0.5604	0.08051	0.0019	0.00515	0.02421	0.00251	0.28579	0.07571	0.264153
Q9M2X0	AT3G49880	T16K5.230	Glycosyl hydrolase family protein 43	GOLGI+er?	UNKNOWN	UNKNOWN	GOLGI	UNKNOWN	0	0	0	1	0.10788	0.83965	0.00278	0.00246	0.0017	0.00941	0.00401	0.00146	0.00477	0.01846	0.00343	0.004	0.94753	0.73177	0.254156
Q9ZVA2	AT1G78830	Q9ZVA2	EP1-like glycoprotein 2	EXTRACELLULAR+golgi?+er?	UNKNOWN	UNKNOWN	EXTRACELLULAR	GOLGI	0	0.00756	0	1	0.11687	0.14248	0.00435	0.00412	0.0085	0.66402	0.00232	0.00264	0.00493	0.04318	0.00336	0.00323	0.25935	0.02561	0.252708
F4HYR4	AT1G62330	OFUT15	O-fucosyltransferase 15	GOLGI+er?	GOLGI	GOLGI CIS	GOLGI	UNKNOWN	0	0	0	1	0.10942	0.84501	0.00307	0.00284	0.00134	0.00605	0.00245	0.00198	0.00493	0.0144	0.0034	0.00512	0.95443	0.73559	0.252361
Q8L4B0	AT3G58790	GAUT15	Probable galacturonosyltransferase 15	GOLGI+er?	UNKNOWN	UNKNOWN	GOLGI	UNKNOWN	0	0	0	1	0.10552	0.83927	0.00328	0.00329	0.00154	0.01838	0.00197	0.00269	0.00318	0.01171	0.00463	0.00453	0.94479	0.73375	0.25155
Q9SIN7	AT2G31710	Q9SIN7	Vacuolar ATPase assembly integral membrane protein VMA21 homolog	ER+golgi?	UNKNOWN	UNKNOWN	ER	UNKNOWN	4e-05	4e-05	0	1	0.84019	0.10513	0.00877	0.00894	0.00124	0.00606	0.00196	0.00582	0.00636	0.00579	0.00334	0.00641	0.94532	0.73506	0.250453
Q9M9M4	AT3G03050	CSLD3	Cellulose synthase-like protein D3	TGN+er+golgi?	UNKNOWN	UNKNOWN	TGN	UNKNOWN	5e-05	5e-05	0	1	0.15187	0.10568	0.00289	0.00196	0.00227	0.03026	0.0016	0.00276	0.00847	0.68376	0.00345	0.00505	0.25755	0.04619	0.245654
Q9FJC9	AT5G53540	APP1	26S proteasome regulatory particle chain RPT6-like protein	PEROXISOME+er?+golgi?	UNKNOWN	UNKNOWN	PEROXISOME	ER	1e-05	0.00472	1e-05	0.75	0.13494	0.11116	0.01588	0.00427	0.002	0.01505	0.00558	0.65271	0.00586	0.02845	0.02027	0.00383	0.2461	0.02378	0.240248
F4IYM4	AT3G09090	DEX1	Protein DEFECTIVE IN EXINE FORMATION 1	ER+golgi?	UNKNOWN	GOLGI CIS	ER	UNKNOWN	0	0	0	1	0.85169	0.10209	0.00296	0.00371	0.00202	0.00559	0.00248	0.00132	0.00673	0.01226	0.00291	0.00625	0.95378	0.7496	0.238827
Q9FJ27	AT5G41870	Q9FJ27	At5g41870	UNKNOWN+EXTRACELLULAR+er?+golgi?	UNKNOWN	EXTRACELLULAR	UNKNOWN	EXTRACELLULAR	0.00093	0.61342	0.00093	0.86905	0.11989	0.11312	0.0037	0.01249	0.00614	0.24329	0.06543	0.00462	0.00676	0.01295	0.40894	0.00266	0.23301	0.00677	0.231433
A0A1I9LSH2	AT3G62360	A0A1I9LSH2	Carbohydrate-binding-like fold	ER+golgi?	ER	ER	ER	UNKNOWN	0	0	0	1	0.86078	0.10028	0.0038	0.00447	0.00128	0.0041	0.00327	0.00177	0.00289	0.01171	0.00293	0.00273	0.96106	0.7605	0.230174

## Sheet: 4. ER-TGN LOPIT
protein_id	alt_ids	gene_name	description	prediction	train_organelle	suborganelle	pred_class1	pred_class2	p_val	p_val_single	p_val_dual	completeness	ER	TGN	CHLOROPLAST	CYTOSOL	EXTRACELLULAR	GOLGI	MITOCHONDRION	NUCLEUS	PEROXISOME	PM	UNKNOWN	VACUOLE	ER+TGN	ER-TGN	(ER+TGN.)*(1-ABS(ER-TGN))
Q8VZ21	AT5G61820	MAC9.6	Stress up-regulated Nod 19 protein	ER+TGN	UNKNOWN	UNKNOWN	ER	TGN	0	0.464	0	1	0.48327	0.41367	0.00254	0.00399	0.02822	0.0451	0.00284	0.00209	0.00249	0.01052	0.00339	0.00189	0.89694	0.0696	0.834513
Q9LIB6	AT3G16860	COBL8	COBRA-like protein 8	TGN+ER	UNKNOWN	UNKNOWN	TGN	ER	0	0.33529	0	1	0.35633	0.55279	0.00244	0.00147	0.01829	0.02472	0.00254	0.00198	0.00334	0.02841	0.00371	0.00397	0.90912	0.19646	0.730514
Q9LFL0	AT5G16910	CSLD2	Cellulose synthase-like protein D2	TGN+ER+golgi?	ER	ER	TGN	ER	0	0.45045	0	1	0.35327	0.45574	0.00286	0.00198	0.01195	0.14315	0.00318	0.00219	0.00308	0.01478	0.00357	0.00425	0.80901	0.10247	0.726111
Q9SN84	AT3G47540	F1P2.90	At3g47540	?ER+TGN+GOLGI	UNKNOWN	UNKNOWN	UNKNOWN	UNKNOWN	0.58456	0.58456	0.01098	0.72619	0.40506	0.33198	0.00528	0.00138	0.00542	0.22164	0.00397	0.00245	0.00247	0.01154	0.00521	0.00359	0.73704	0.07308	0.683177
Q8LD98	AT1G65690	NHL6	NDR1/HIN1-like protein 6	ER+TGN	UNKNOWN	UNKNOWN	ER	TGN	0	0.33453	0	0.75	0.55439	0.31156	0.00415	0.00108	0.00466	0.02782	0.00495	0.00564	0.00558	0.05676	0.02115	0.00226	0.86595	0.24283	0.655671
Q38908	AT1G32170	XTH30	Probable xyloglucan endotransglucosylase/hydrolase protein 30	ER+TGN+golgi	UNKNOWN	UNKNOWN	ER	TGN	0.00066	0.46191	0.00066	1	0.46539	0.30698	0.00378	0.00141	0.0068	0.18131	0.00382	0.00244	0.00292	0.01598	0.00366	0.00551	0.77237	0.15841	0.650019
Q9SRT7	AT3G02210	COBL1	COBRA-like protein 1	?ER+TGN+GOLGI	UNKNOWN	UNKNOWN	UNKNOWN	UNKNOWN	0.61274	0.61274	0.06619	1	0.36033	0.30473	0.00508	0.00181	0.00612	0.24124	0.00408	0.00455	0.0045	0.05479	0.00858	0.00419	0.66506	0.0556	0.628083
Q9FKU4	AT5G56020	MDA7.6	Vesicle transport protein	TGN+ER	UNKNOWN	UNKNOWN	TGN	ER	0	0.14917	0	0.94048	0.29794	0.60139	0.00499	0.0012	0.00543	0.05001	0.00215	0.00147	0.00341	0.01868	0.00996	0.00337	0.89933	0.30345	0.626428
Q9XGZ2	AT5G25930	T1N24.22	Kinase family with leucine-rich repeat domain-containing protein	?TGN+ER+PM	UNKNOWN	UNKNOWN	UNKNOWN	UNKNOWN	0.60729	0.60729	0.31666	1	0.30448	0.33895	0.00516	0.00212	0.02792	0.00768	0.00283	0.00336	0.01451	0.28333	0.00599	0.00367	0.64343	0.03447	0.621251
Q9FPJ5	AT5G21090	LRR1	Leucine-rich repeat protein 1	?ER+TGN+GOLGI	UNKNOWN	UNKNOWN	UNKNOWN	UNKNOWN	0.5558	0.5558	0.09345	1	0.44001	0.26512	0.00584	0.00102	0.00453	0.25954	0.00485	0.00206	0.00347	0.00718	0.00368	0.0027	0.70513	0.17489	0.58181
Q0WPQ2	AT3G23150	ETR2	Ethylene receptor 2	TGN+ER	UNKNOWN	UNKNOWN	TGN	ER	0	0.0829	0	1	0.27393	0.63276	0.00653	0.00114	0.02695	0.00782	0.00133	0.00279	0.008	0.02834	0.00877	0.00164	0.90669	0.35883	0.581342
O82301	AT2G35360	O82301	Ubiquitin family protein	?ER+TGN+GOLGI	UNKNOWN	UNKNOWN	UNKNOWN	UNKNOWN	0.57565	0.57565	0.07068	0.82143	0.4297	0.26441	0.00452	0.00234	0.00889	0.23485	0.00406	0.00318	0.0026	0.03617	0.00393	0.00535	0.69411	0.16529	0.579381
F4KIJ2	AT5G24810	F4KIJ2	ABC1 family protein	ER+TGN+pm?	UNKNOWN	UNKNOWN	ER	TGN	0	0.12914	0	1	0.57391	0.26218	0.00288	0.00224	0.01587	0.02217	0.00282	0.00318	0.00365	0.1021	0.00323	0.00579	0.83609	0.31173	0.575456
Q9M0D2	AT4G30280	XTH18	Probable xyloglucan endotransglucosylase/hydrolase protein 18	?ER+TGN+golgi	UNKNOWN	EXTRACELLULAR	UNKNOWN	UNKNOWN	0.24052	0.24052	0.0012	1	0.54122	0.24955	0.00421	0.00111	0.00725	0.17361	0.00384	0.00233	0.00296	0.00834	0.00274	0.00283	0.79077	0.29167	0.560126
Q8GZ17	AT4G16120	COBL7	COBRA-like protein 7	TGN+ER+pm?	UNKNOWN	UNKNOWN	TGN	ER	0	0.06037	0	1	0.2455	0.59532	0.00248	0.00193	0.00643	0.0171	0.00295	0.00296	0.00517	0.10958	0.0049	0.00566	0.84082	0.34982	0.546684
Q38857	AT5G57560	XTH22	Xyloglucan endotransglucosylase/hydrolase protein 22	ER+TGN+golgi?	UNKNOWN	EXTRACELLULAR	ER	TGN	0	0.12033	0	1	0.58667	0.23378	0.00435	0.00097	0.00856	0.14532	0.00361	0.00202	0.00379	0.00557	0.00309	0.00227	0.82045	0.35289	0.530921
Q8VZN3	AT5G16380	MQK4.11	Uncharacterized protein At5g16380	ER+TGN	UNKNOWN	UNKNOWN	ER	TGN	0	0.07064	0	0.55952	0.64686	0.23854	0.00341	0.00138	0.02207	0.02337	0.00277	0.02265	0.00475	0.0297	0.0032	0.0013	0.8854	0.40832	0.523873
Q38921	AT5G52210	GB1	At5g52210	TGN+ER+golgi?	UNKNOWN	UNKNOWN	TGN	ER	0.00011	0.20141	0.00011	1	0.22002	0.52762	0.00219	0.01234	0.06399	0.1481	0.00359	0.00158	0.00335	0.00799	0.00545	0.00377	0.74764	0.3076	0.517666
O80612	AT2G02970	APY6	Probable apyrase 6	?ER+GOLGI+TGN	UNKNOWN	UNKNOWN	UNKNOWN	UNKNOWN	0.55514	0.55514	0.00995	1	0.40952	0.22432	0.00418	0.00174	0.05332	0.28713	0.00405	0.00217	0.00335	0.00371	0.00372	0.00279	0.63384	0.1852	0.516453
Q9LJR2	AT3G15356	LEC	Lectin-like protein LEC	?GOLGI+TGN+ER	UNKNOWN	EXTRACELLULAR	UNKNOWN	UNKNOWN	0.59524	0.59524	0.04919	1	0.23975	0.30275	0.00349	0.00163	0.04302	0.39082	0.00387	0.00279	0.00328	0.00303	0.0037	0.00188	0.5425	0.063	0.508322
Q38890	AT5G49720	KOR	Endoglucanase 25	TGN+ER+pm	UNKNOWN	UNKNOWN	TGN	ER	0.0001	0.06936	0.0001	1	0.21132	0.57945	0.00229	0.00244	0.01037	0.01206	0.00255	0.00354	0.00515	0.15796	0.00608	0.00679	0.79077	0.36813	0.499664
Q38910	AT4G25810	XTH23	Probable xyloglucan endotransglucosylase/hydrolase protein 23	ER+tgn+golgi	UNKNOWN	EXTRACELLULAR	ER	TGN	1e-05	0.02855	1e-05	1	0.60675	0.1813	0.006	0.00086	0.02841	0.15614	0.00356	0.00185	0.00669	0.0032	0.00381	0.00144	0.78805	0.42545	0.452774
Q8L8Q7	AT3G29810	COBL2; COBL3	COBRA-like protein 2	GOLGI+TGN+er	UNKNOWN	UNKNOWN	GOLGI	TGN	0.0001	0.5657	0.0001	1	0.17483	0.38699	0.00301	0.00184	0.00655	0.38767	0.00426	0.00246	0.0034	0.01981	0.00307	0.00609	0.56182	0.21216	0.442624
Q0WQL0	AT4G00300	A_IG005I10.16	Receptor-like kinase	?EXTRACELLULAR+TGN+ER	UNKNOWN	UNKNOWN	UNKNOWN	UNKNOWN	0.48992	0.48992	0.01931	1	0.20128	0.27663	0.00326	0.00449	0.41572	0.07003	0.00367	0.00224	0.0042	0.00843	0.00471	0.00535	0.47791	0.07535	0.441899
Q9C6B8	AT1G73590	PIN1	Auxin efflux carrier component 1	?PM+TGN+er	UNKNOWN	UNKNOWN	UNKNOWN	UNKNOWN	0.5424	0.5424	0.00107	1	0.18025	0.33133	0.00303	0.00374	0.02207	0.02325	0.00379	0.00341	0.00519	0.39282	0.00428	0.02683	0.51158	0.15108	0.43429
Q41906	AT2G40880	CYS3	Cysteine proteinase inhibitor 3	?ER+PM+tgn+golgi?	UNKNOWN	UNKNOWN	UNKNOWN	UNKNOWN	0.60986	0.60986	0.01377	0.7381	0.35041	0.17233	0.00596	0.0032	0.01283	0.12862	0.00485	0.00772	0.00403	0.29883	0.0067	0.00451	0.52274	0.17808	0.42965
Q8S403	AT3G23430	PHO1	Phosphate transporter PHO1	TGN+er+unknown?	UNKNOWN	UNKNOWN	TGN	ER	0	0.05115	0	0.88095	0.15756	0.57118	0.00193	0.00998	0.02772	0.05083	0.00272	0.0015	0.01636	0.01635	0.1362	0.00766	0.72874	0.41362	0.427319
Q9LMK6	AT1G07135	F10K1.16	At1g07135	GOLGI+ER+tgn	UNKNOWN	UNKNOWN	GOLGI	ER	0.00023	0.48492	0.00023	0.72619	0.30534	0.18192	0.00528	0.00217	0.00462	0.4526	0.00531	0.00238	0.00278	0.02688	0.00384	0.00689	0.48726	0.12342	0.427122
Q9S845	AT1G76340	GONST3	GDP-mannose transporter GONST3	?TGN+chloroplast+er	UNKNOWN	UNKNOWN	UNKNOWN	UNKNOWN	0.11615	0.11615	0.0094	0.95238	0.1542	0.53728	0.1768	0.00142	0.00777	0.06728	0.00245	0.0017	0.02932	0.00339	0.01711	0.00128	0.69148	0.38308	0.426588
Q8RWU6	AT1G79610	NHX6	Sodium/hydrogen exchanger 6	TGN+er	UNKNOWN	UNKNOWN	TGN	ER	0	0.00439	0	0.9881	0.18062	0.69153	0.0017	0.00323	0.03811	0.03468	0.00256	0.00287	0.00259	0.03278	0.0038	0.00553	0.87215	0.51091	0.42656
Q9M1T6	AT3G45230	APAP1	Hydroxyproline-rich glycoprotein family protein	TGN+er	UNKNOWN	UNKNOWN	TGN	ER	0	0.0013	0	0.86905	0.19391	0.75159	0.00211	0.0011	0.00489	0.01623	0.00197	0.00184	0.00359	0.01529	0.00507	0.00241	0.9455	0.55768	0.418214
O22807	AT2G33570	GALS1	Galactan beta-1,4-galactosyltransferase GALS1	?MITOCHONDRION+TGN+er	UNKNOWN	EXTRACELLULAR	UNKNOWN	UNKNOWN	0.55065	0.55065	0.05184	0.63095	0.17538	0.29839	0.00342	0.00223	0.08161	0.03251	0.36815	0.00246	0.01322	0.00229	0.01871	0.00164	0.47377	0.12301	0.415492
Q8L7Q7	AT5G64640	PME64	Probable pectinesterase/pectinesterase inhibitor 64 [Includes: Pectinesterase inhibitor 64	?PM+TGN+er	UNKNOWN	UNKNOWN	UNKNOWN	UNKNOWN	0.6148	0.6148	0.00594	1	0.15626	0.35008	0.00235	0.00909	0.01851	0.07377	0.00341	0.00485	0.00544	0.35751	0.01239	0.00633	0.50634	0.19382	0.408201
Q9M9M4	AT3G03050	CSLD3	Cellulose synthase-like protein D3	TGN+er+golgi?	UNKNOWN	UNKNOWN	TGN	UNKNOWN	5e-05	5e-05	0	1	0.15187	0.68376	0.00196	0.00227	0.03026	0.10568	0.00289	0.0016	0.00276	0.00847	0.00345	0.00505	0.83563	0.53189	0.391167
Q9STW8	AT4G24260	KOR3	Endoglucanase 21	?EXTRACELLULAR+ER+tgn+pm?	UNKNOWN	UNKNOWN	UNKNOWN	UNKNOWN	0.69803	0.69803	0.02443	0.86905	0.29387	0.1584	0.00388	0.03223	0.29403	0.02891	0.00628	0.00294	0.00646	0.10372	0.00327	0.06601	0.45227	0.13547	0.391001
Q8S8Q6	AT2G23810	TET8	Tetraspanin-8	TGN+pm+er?	UNKNOWN	UNKNOWN	TGN	PM	0	0.00335	0	1	0.13703	0.63328	0.00239	0.00293	0.00866	0.02406	0.00366	0.00279	0.00439	0.15811	0.00465	0.01804	0.77031	0.49625	0.388044
Q9SFU6	AT3G07160	CALS9	Callose synthase 9	TGN+PM+er?	UNKNOWN	UNKNOWN	TGN	PM	0	0.33466	0	1	0.12086	0.49831	0.00243	0.0034	0.00829	0.02359	0.00401	0.00384	0.00509	0.31467	0.00419	0.01131	0.61917	0.37745	0.385464
Q9FG35	AT5G06700	TBR	Protein trichome birefringence	TGN+GOLGI+er?	UNKNOWN	UNKNOWN	TGN	GOLGI	0	0.31197	0	1	0.1053	0.52252	0.00259	0.00134	0.02554	0.32695	0.00339	0.00184	0.00279	0.00273	0.00295	0.00206	0.62782	0.41722	0.365881
Q9XIE6	AT1G59820	ALA3	Phospholipid-transporting ATPase 3	PM+TGN+er?	UNKNOWN	UNKNOWN	PM	TGN	0	0.47879	0	1	0.11391	0.3566	0.00232	0.00492	0.01729	0.03774	0.00403	0.00343	0.0049	0.43086	0.00352	0.02047	0.47051	0.24269	0.356322
Q8GUM5	AT3G52640	Q8GUM5	Nicastrin	TGN+pm?+er?	UNKNOWN	UNKNOWN	TGN	UNKNOWN	0.00059	0.00059	0	1	0.12027	0.67289	0.00212	0.00276	0.00559	0.01968	0.00323	0.00313	0.00441	0.14894	0.00527	0.01168	0.79316	0.55262	0.354844
Q9MAG3	AT1G53390	ABCG24	ABC transporter G family member 24	TGN+PM+er?	UNKNOWN	UNKNOWN	TGN	PM	0	0.04656	0	1	0.10506	0.60927	0.00196	0.00354	0.00702	0.02083	0.00344	0.0035	0.00448	0.22561	0.00473	0.01057	0.71433	0.50421	0.354158
Q9SUD4	AT4G28050	TET7	Tetraspanin-7	TGN+er?	UNKNOWN	UNKNOWN	TGN	UNKNOWN	2e-05	2e-05	0	1	0.14697	0.75489	0.00204	0.00191	0.00392	0.03572	0.00247	0.00219	0.00297	0.03683	0.0049	0.00519	0.90186	0.60792	0.353601
Q9FKY5	AT5G65970	MLO10	MLO-like protein 10	?EXTRACELLULAR+TGN+golgi+er?	UNKNOWN	UNKNOWN	UNKNOWN	UNKNOWN	0.60175	0.60175	0.02598	0.85714	0.14118	0.25415	0.00309	0.00167	0.41584	0.16278	0.0046	0.00352	0.00448	0.00419	0.00295	0.00156	0.39533	0.11297	0.35067
Q9FKA4	AT5G39580	PER62	Peroxidase 62	ER+EXTRACELLULAR	ER	ER	ER	EXTRACELLULAR	0	0.04674	0	1	0.59019	0.09751	0.0049	0.00174	0.21309	0.07235	0.00392	0.00217	0.00355	0.00542	0.00284	0.00234	0.6877	0.49268	0.348884
Q07488	AT5G20230	BCB	Blue copper protein	ER+tgn?	UNKNOWN	UNKNOWN	ER	UNKNOWN	1e-05	1e-05	0	1	0.77204	0.1487	0.00276	0.00155	0.00582	0.0237	0.00248	0.00196	0.00239	0.03241	0.00224	0.00396	0.92074	0.62334	0.346806
Q9FYH7	AT1G30900	VSR6	Vacuolar-sorting receptor 6	NUCLEUS+TGN+er?	UNKNOWN	UNKNOWN	NUCLEUS	TGN	0	0.44072	0	1	0.10917	0.34097	0.00639	0.00169	0.01396	0.00599	0.00329	0.47793	0.01316	0.01676	0.00926	0.00143	0.45014	0.2318	0.345798
O22757	AT2G17480	MLO8	MLO-like protein 8	TGN+er?	UNKNOWN	UNKNOWN	TGN	UNKNOWN	0	0	0	1	0.13777	0.75198	0.00183	0.00214	0.00827	0.01721	0.00237	0.00244	0.00339	0.06075	0.00429	0.00755	0.88975	0.61421	0.343257
Q8L778	AT5G09870	CESA5	Cellulose synthase A catalytic subunit 5 [UDP-forming]	ER+pm?+extracellular?	UNKNOWN	UNKNOWN	ER	PM	0.00052	0.04483	0.00052	1	0.5778	0.09037	0.00373	0.00636	0.10095	0.03911	0.00423	0.00267	0.0037	0.13326	0.00265	0.03516	0.66817	0.48743	0.342484
O48946	AT4G32410	CESA1	Cellulose synthase A catalytic subunit 1 [UDP-forming]	ER+tgn?	UNKNOWN	UNKNOWN	ER	UNKNOWN	3e-05	3e-05	0	1	0.67548	0.11003	0.00292	0.00369	0.02218	0.07398	0.00355	0.00221	0.0027	0.06159	0.0028	0.03886	0.78551	0.56545	0.341343
Q94JQ6	AT5G64740	CESA6	Cellulose synthase A catalytic subunit 6 [UDP-forming]	ER+golgi?+tgn?	UNKNOWN	UNKNOWN	ER	GOLGI	0	0.00404	0	1	0.64971	0.10307	0.00334	0.00287	0.01172	0.1036	0.00363	0.00225	0.0028	0.06962	0.0032	0.04418	0.75278	0.54664	0.34128
Q5XPJ9	AT2G38440	SCAR2	Protein SCAR2	?ER+PM+vacuole+tgn?	UNKNOWN	UNKNOWN	UNKNOWN	UNKNOWN	0.61225	0.61225	0.03887	0.88095	0.33757	0.10496	0.00265	0.01443	0.04686	0.01512	0.00357	0.00497	0.00509	0.23777	0.07405	0.15298	0.44253	0.23261	0.339593
Q94CD8	AT3G13560	Q94CD8	Glucan endo-1,3-beta-glucosidase 4	ER+PM	UNKNOWN	UNKNOWN	ER	PM	0	0.3299	0	1	0.53984	0.07754	0.00436	0.00156	0.00832	0.00687	0.00242	0.0033	0.02513	0.32235	0.00502	0.00329	0.61738	0.4623	0.331965
Q9SPE5	AT4G20410	GSNAP	Gamma-soluble NSF attachment protein	PM+ER+tgn?	UNKNOWN	UNKNOWN	PM	ER	0	0.28618	0	1	0.28073	0.11138	0.00207	0.00477	0.01734	0.01513	0.00269	0.00366	0.00502	0.54104	0.00431	0.01187	0.39211	0.16935	0.325706
Q38846	AT2G40940	ERS1	Ethylene response sensor 1	TGN+er?	UNKNOWN	UNKNOWN	TGN	UNKNOWN	0	0	0	0.86905	0.14352	0.80219	0.00182	0.00106	0.00498	0.02407	0.00194	0.00182	0.00241	0.00958	0.00499	0.00162	0.94571	0.65867	0.322799
Q9LSK9	AT5G65660	Q9LSK9	Uncharacterized protein At5g65660	ER+pm	UNKNOWN	UNKNOWN	ER	PM	0	0.0069	0	1	0.65426	0.08693	0.00348	0.00219	0.01275	0.02892	0.00297	0.00266	0.00273	0.17839	0.00293	0.02179	0.74119	0.56733	0.320691
Q9FZ29	AT1G02310	MAN1	Mannan endo-1,4-beta-mannosidase 1	ER+EXTRACELLULAR+golgi?	UNKNOWN	UNKNOWN	ER	EXTRACELLULAR	1e-05	0.36565	1e-05	0.97619	0.47977	0.06357	0.00556	0.00138	0.29081	0.1354	0.00475	0.00306	0.00355	0.00714	0.00256	0.00245	0.54334	0.4162	0.317202
Q9FH36	AT5G54690	GAUT12	Probable galacturonosyltransferase 12	?ER+EXTRACELLULAR+golgi?+nucleus?	UNKNOWN	UNKNOWN	UNKNOWN	UNKNOWN	0.5784	0.5784	0.00318	0.5	0.42269	0.06385	0.00618	0.00124	0.2366	0.13249	0.00476	0.11024	0.00882	0.00304	0.00824	0.00186	0.48654	0.35884	0.31195
E1A7R2	AT2G46990	IAA20	Auxin-responsive protein	ER+tgn?	UNKNOWN	UNKNOWN	ER	UNKNOWN	0	0	0	0.82143	0.7944	0.13029	0.00237	0.0017	0.03818	0.0146	0.00239	0.00167	0.00241	0.00662	0.0025	0.00286	0.92469	0.66411	0.310594
O48670	AT4G39220	RER1A	Protein RER1A	ER+golgi	UNKNOWN	UNKNOWN	ER	GOLGI	0	0.03898	0	1	0.64933	0.07411	0.00392	0.00375	0.00904	0.17764	0.00452	0.00238	0.00209	0.05246	0.00248	0.0183	0.72344	0.57522	0.307303
Q2EF88	AT5G53550	YSL3	Metal-nicotianamine transporter YSL3	ER+pm+golgi?	UNKNOWN	UNKNOWN	ER	PM	1e-05	0.03183	1e-05	1	0.59786	0.06031	0.00593	0.00267	0.01132	0.1288	0.00409	0.00468	0.00298	0.17015	0.00444	0.00676	0.65817	0.53755	0.304371
Q9SHZ3	AT2G05760	NAT1	Nucleobase-ascorbate transporter 1	ER+PM	UNKNOWN	UNKNOWN	ER	PM	0	0.52361	0	0.5	0.4408	0.0504	0.03346	0.0012	0.00465	0.01788	0.00295	0.00205	0.00748	0.42443	0.00644	0.00826	0.4912	0.3904	0.299436
Q6R8G5	AT2G03240	PHO1-H5	Phosphate transporter PHO1 homolog 5	?GOLGI+EXTRACELLULAR+tgn+er?	UNKNOWN	UNKNOWN	UNKNOWN	UNKNOWN	0.53876	0.53876	0.05948	1	0.13052	0.18588	0.00414	0.00436	0.23445	0.38217	0.00314	0.00555	0.00414	0.00313	0.04107	0.00147	0.3164	0.05536	0.298884
Q84K13	AT4G33440	Q84K13	Pectin lyase-like superfamily protein	GOLGI+ER	UNKNOWN	UNKNOWN	GOLGI	ER	0	0.48825	0	0.88095	0.42228	0.05209	0.01453	0.001	0.03749	0.45158	0.00301	0.00192	0.00306	0.00311	0.00804	0.00188	0.47437	0.37019	0.298763
Q9SR10	AT3G04640	Q9SR10	At3g04640	?ER+PM+GOLGI	UNKNOWN	UNKNOWN	UNKNOWN	UNKNOWN	0.60489	0.60489	0.14447	0.86905	0.38262	0.05656	0.00814	0.00264	0.00599	0.23566	0.00541	0.00361	0.00373	0.26632	0.00833	0.02098	0.43918	0.32606	0.295981
Q8S926	AT2G45170	ATG8E	Autophagy-related protein 8e	?PM+er+golgi+tgn?	UNKNOWN	VACUOLE	UNKNOWN	UNKNOWN	0.33232	0.33232	0.01956	0.60714	0.17941	0.12852	0.00492	0.005	0.01512	0.17895	0.00646	0.00514	0.00418	0.46042	0.00473	0.00716	0.30793	0.05089	0.292259
Q9XIQ7	AT1G64890	Q9XIQ7	Probable folate-biopterin transporter 7	ER+tgn?	UNKNOWN	UNKNOWN	ER	UNKNOWN	0	0	0	0.85714	0.79353	0.11098	0.00239	0.00581	0.01402	0.03267	0.00237	0.00246	0.00152	0.02438	0.00302	0.00685	0.90451	0.68255	0.287137
O04478	AT1G65610	KOR2	Endoglucanase 7	?EXTRACELLULAR+TGN+vacuole?+er?	UNKNOWN	UNKNOWN	UNKNOWN	UNKNOWN	0.55088	0.55088	0.00882	1	0.10019	0.21722	0.00414	0.01342	0.42577	0.01912	0.00628	0.00289	0.01003	0.07568	0.00685	0.1184	0.31741	0.11703	0.280264
Q67YS6	AT5G46150	ALIS2	Putative ALA-interacting subunit 2	GOLGI+ER	UNKNOWN	UNKNOWN	GOLGI	ER	0	0.28631	0	1	0.30433	0.06291	0.00315	0.00469	0.02021	0.54983	0.00415	0.00226	0.0025	0.01756	0.00339	0.02502	0.36724	0.24142	0.278581
O80961	AT2G39200	MLO12	MLO-like protein 12	?EXTRACELLULAR+tgn+pm?+er?	UNKNOWN	UNKNOWN	UNKNOWN	UNKNOWN	0.38551	0.38551	0.07991	0.96429	0.11637	0.16859	0.00487	0.00943	0.53564	0.00596	0.00396	0.00401	0.00991	0.1334	0.0038	0.00405	0.28496	0.05222	0.270079
Q941L0	AT5G05170	CESA3	Cellulose synthase A catalytic subunit 3 [UDP-forming]	?PM+ER+GOLGI	UNKNOWN	UNKNOWN	UNKNOWN	UNKNOWN	0.57104	0.57104	0.12217	1	0.2581	0.07309	0.00472	0.00439	0.01351	0.24166	0.00582	0.00348	0.00367	0.36301	0.00306	0.02548	0.33119	0.18501	0.269917
Q9ZQG9	AT2G27500	Q9ZQG9	Glucan endo-1,3-beta-glucosidase 14	ER+tgn?	UNKNOWN	UNKNOWN	ER	UNKNOWN	1e-05	1e-05	0	0.7619	0.83578	0.11708	0.00186	0.00218	0.01669	0.00634	0.00175	0.00146	0.00244	0.00747	0.00389	0.00306	0.95286	0.7187	0.26804
C0LGJ1	AT1G74360	C0LGJ1	Probable LRR receptor-like serine/threonine-protein kinase At1g74360	?MITOCHONDRION+ER+EXTRACELLULAR	UNKNOWN	UNKNOWN	UNKNOWN	UNKNOWN	0.5792	0.5792	0.20989	0.61905	0.29152	0.05468	0.0041	0.00313	0.246	0.00603	0.36544	0.0029	0.00654	0.01473	0.00274	0.00218	0.3462	0.23684	0.264206
O22755	AT2G17450	ATL44	Probable E3 ubiquitin-protein ligase ATL44	PM+ER	UNKNOWN	UNKNOWN	PM	ER	0	0.25719	0	0.63095	0.28841	0.0548	0.00591	0.00229	0.01048	0.02869	0.00327	0.00891	0.00357	0.57763	0.01275	0.00329	0.34321	0.23361	0.263033
F4IFT7	AT2G27389	F4IFT7	Glycine-rich protein	ER+golgi?	UNKNOWN	UNKNOWN	ER	UNKNOWN	8e-05	8e-05	0	0.91667	0.72474	0.05403	0.00526	0.0074	0.01255	0.13025	0.00377	0.00252	0.00175	0.04855	0.00406	0.00511	0.77877	0.67071	0.256441
O49434	AT4G20070	AAH	Allantoate deiminase	ER	UNKNOWN	UNKNOWN	ER	UNKNOWN	0	0	0	0.63095	0.82022	0.09675	0.00482	0.00204	0.01355	0.01152	0.00189	0.00139	0.00478	0.00632	0.03279	0.00393	0.91697	0.72347	0.25357
Q9LHD2	AT3G28340	GATL10	Probable galacturonosyltransferase-like 10	ER	UNKNOWN	UNKNOWN	ER	UNKNOWN	0	0	0	0.88095	0.80125	0.0849	0.00296	0.00143	0.02259	0.05554	0.00353	0.00231	0.00709	0.00319	0.01323	0.00198	0.88615	0.71635	0.251356
Q9LM69	AT1G20823	ATL80	RING-H2 finger protein ATL80	?PM+extracellular+er?+tgn?	UNKNOWN	UNKNOWN	UNKNOWN	UNKNOWN	0.46714	0.46714	0.05778	0.92857	0.12831	0.11633	0.00415	0.01405	0.19355	0.03138	0.00517	0.00354	0.0054	0.44185	0.00279	0.05348	0.24464	0.01198	0.241709
O49362	AT4G32290	O49362	At4g32290	?GOLGI+unknown?+tgn?+er?	UNKNOWN	UNKNOWN	UNKNOWN	UNKNOWN	0.15823	0.15823	0.01596	0.63095	0.10968	0.13287	0.05305	0.00195	0.00336	0.52785	0.00404	0.00217	0.00504	0.00648	0.14941	0.0041	0.24255	0.02319	0.236925
Q9SN68	AT4G19640	RABF2B	Ras-related protein RABF2b	PM+ER	UNKNOWN	ER	PM	ER	0	0.02685	0	1	0.20389	0.05335	0.00324	0.00284	0.02213	0.03002	0.00366	0.00292	0.00327	0.64503	0.00339	0.02627	0.25724	0.15054	0.218515
A0A1P8B1H1	AT2G17850	A0A1P8B1H1	Rhodanese/Cell cycle control phosphatase superfamily protein	ER	UNKNOWN	UNKNOWN	ER	UNKNOWN	0	0	0	1	0.86245	0.08389	0.00207	0.0017	0.02463	0.00616	0.00177	0.00154	0.0022	0.00848	0.00233	0.00279	0.94634	0.77856	0.209558
Q9SB70	AT4G24760	Q9SB70	Alpha/beta-Hydrolases superfamily protein	?UNKNOWN+EXTRACELLULAR+er	UNKNOWN	UNKNOWN	UNKNOWN	UNKNOWN	0.5842	0.5842	0.01063	0.63095	0.18662	0.05187	0.00633	0.01669	0.27741	0.00683	0.00605	0.00771	0.02468	0.06179	0.32473	0.0293	0.23849	0.13475	0.206353
Q9SPE6	AT3G56190	ASNAP2	Alpha-soluble NSF attachment protein 2	PM+er?+extracellular?	UNKNOWN	UNKNOWN	PM	ER	1e-05	0.04077	1e-05	1	0.12914	0.08215	0.00264	0.07131	0.10605	0.01101	0.00521	0.00638	0.00753	0.57097	0.00383	0.00378	0.21129	0.04699	0.201361
Q9FII5	AT5G61480	TDR	Leucine-rich repeat receptor-like protein kinase TDR	PM+er?	UNKNOWN	UNKNOWN	PM	UNKNOWN	0	0	0	1	0.1017	0.08717	0.00288	0.00236	0.02317	0.00882	0.00275	0.00415	0.00421	0.7531	0.00292	0.00677	0.18887	0.01453	0.186126
A0A1I9LSA0	AT3G16920	CTL2	Chitinase-like protein	ER	UNKNOWN	UNKNOWN	ER	UNKNOWN	0	0	0	0.5	0.85444	0.05275	0.00237	0.00404	0.0479	0.01075	0.00157	0.00487	0.00245	0.00926	0.00595	0.00366	0.90719	0.80169	0.179905
Q9FKK7	AT5G57655	XYLA	Xylose isomerase	ER	ER	ER	ER	UNKNOWN	0	0	0	1	0.88599	0.07318	0.00245	0.00092	0.00331	0.01362	0.00187	0.00142	0.00179	0.0112	0.00181	0.00245	0.95917	0.81281	0.179547
Q8L7R3	AT1G80950	LPEAT1	Lysophospholipid acyltransferase LPEAT1	ER	ER	ER	ER	UNKNOWN	0	0	0	0.88095	0.87957	0.06489	0.00233	0.00145	0.00309	0.01398	0.0021	0.00169	0.00211	0.02318	0.00265	0.00296	0.94446	0.81468	0.175027
Q84W75	AT1G29090	Q84W75	Cysteine proteinases superfamily protein	GOLGI+er?+chloroplast?	UNKNOWN	UNKNOWN	UNKNOWN	UNKNOWN	0.05942	0.05942	0.00238	1	0.12436	0.05396	0.10998	0.00121	0.00433	0.59012	0.009	0.00362	0.08705	0.00632	0.00808	0.00196	0.17832	0.0704	0.165766
Q9ZT49	AT4G35480	ATL45	Probable E3 ubiquitin-protein ligase ATL45	PM+er?	UNKNOWN	UNKNOWN	PM	UNKNOWN	0	0	0	0.85714	0.12109	0.0553	0.00328	0.00238	0.01606	0.03161	0.00344	0.00478	0.0028	0.75121	0.00272	0.00532	0.17639	0.06579	0.164785
Q8LFQ6	AT5G20500	GRXC4	Glutaredoxin-C4	ER	UNKNOWN	UNKNOWN	ER	UNKNOWN	0	0	0	1	0.89328	0.06421	0.00204	0.00106	0.01079	0.0142	0.00216	0.00123	0.00171	0.00481	0.00189	0.00262	0.95749	0.82907	0.163664
Q9LUC6	AT3G14680	CYP72A14	Cytochrome P450 72A14	ER	UNKNOWN	UNKNOWN	ER	UNKNOWN	0	0	0	0.85714	0.8864	0.05354	0.00223	0.00281	0.0163	0.00516	0.00118	0.00463	0.00197	0.01954	0.00398	0.00226	0.93994	0.83286	0.157102
Q9M9N5	AT3G03160	Q9M9N5	Endoplasmic reticulum transmembrane protein	ER	UNKNOWN	UNKNOWN	ER	UNKNOWN	0	0	0	0.96429	0.90029	0.05086	0.00219	0.00152	0.00315	0.01252	0.00196	0.00162	0.00138	0.01745	0.00213	0.00493	0.95115	0.84943	0.143215
																									0	0	0
																									0	0	0
																									0	0	0
																									0	0	0
																									0	0	0
																									0	0	0
																									0	0	0
																									0	0	0
																									0	0	0
																									0	0	0
																									0	0	0
																									0	0	0
																									0	0	0
																									0	0	0
																									0	0	0
																									0	0	0
																									0	0	0
																									0	0	0
																									0	0	0
																									0	0	0
																									0	0	0
																									0	0	0
																									0	0	0
																									0	0	0
																									0	0	0
																									0	0	0
																									0	0	0
																									0	0	0
																									0	0	0
																									0	0	0
																									0	0	0
																									0	0	0
																									0	0	0
																									0	0	0
																									0	0	0
																									0	0	0
																									0	0	0
																									0	0	0
																									0	0	0
																									0	0	0
																									0	0	0
																									0	0	0
																									0	0	0
																									0	0	0
																									0	0	0
																									0	0	0
																									0	0	0
																									0	0	0
																									0	0	0
																									0	0	0
																									0	0	0
																									0	0	0
																									0	0	0
																									0	0	0
																									0	0	0
																									0	0	0
																									0	0	0
																									0	0	0
																									0	0	0
																									0	0	0
																									0	0	0
																									0	0	0
																									0	0	0
																									0	0	0
																									0	0	0
																									0	0	0
																									0	0	0
																									0	0	0
																									0	0	0
																									0	0	0
																									0	0	0
																									0	0	0
																									0	0	0
																									0	0	0
																									0	0	0
																									0	0	0
																									0	0	0
																									0	0	0
																									0	0	0
																									0	0	0
																									0	0	0
																									0	0	0
																									0	0	0
																									0	0	0
																									0	0	0
																									0	0	0
																									0	0	0
																									0	0	0
																									0	0	0
																									0	0	0
																									0	0	0
																									0	0	0
																									0	0	0
																									0	0	0
																									0	0	0
																									0	0	0
																									0	0	0
																									0	0	0
																									0	0	0
																									0	0	0

## Sheet: 5. ER-Vac. LOPIT
protein_id	alt_ids	gene_name	description	prediction	train_organelle	suborganelle	pred_class1	pred_class2	p_val	p_val_single	p_val_dual	completeness	ER	VACUOLE	MITOCHONDRION	CHLOROPLAST	CYTOSOL	EXTRACELLULAR	GOLGI	NUCLEUS	PEROXISOME	PM	TGN	UNKNOWN	ER+Vac.	ER-Vac.	(ER+Vac.)*(1-ABS(ER-Vac.))
Q9ZPR4	AT2G03620	MRS2-5	Magnesium transporter MRS2-5	ER+VACUOLE	UNKNOWN	UNKNOWN	ER	VACUOLE	0	0.47724	0	0.9881	0.41373	0.34845	0.00633	0.00417	0.01613	0.01529	0.04238	0.00425	0.01662	0.09916	0.00469	0.02881	0.76218	0.06528	0.712425
Q8GXN6	AT5G63880	VPS20.1	Vacuolar protein sorting-associated protein 20 homolog 1	?ER+VACUOLE+pm?	UNKNOWN	UNKNOWN	UNKNOWN	UNKNOWN	0.43068	0.43068	0.00147	0.5119	0.45515	0.31444	0.01865	0.00521	0.00403	0.00376	0.0336	0.00301	0.00994	0.12849	0.00595	0.01776	0.76959	0.14071	0.661301
O81816	AT4G38540	MO2	Monooxygenase 2	ER+VACUOLE	UNKNOWN	UNKNOWN	ER	VACUOLE	0	0.19633	0	1	0.52971	0.24852	0.00814	0.00681	0.00757	0.00396	0.09393	0.00383	0.00519	0.07469	0.00377	0.01387	0.77823	0.28119	0.5594
Q9SVL6	AT3G50830	COR413PM2	Cold-regulated 413 plasma membrane protein 2	?VACUOLE+PM+ER	UNKNOWN	UNKNOWN	UNKNOWN	UNKNOWN	0.63748	0.63748	0.18339	1	0.26386	0.34362	0.00472	0.00477	0.01134	0.04261	0.03681	0.00355	0.00441	0.27207	0.00642	0.00581	0.60748	0.07976	0.559027
O04083	AT1G11090	MAGL1	Alpha/beta-Hydrolases superfamily protein	?ER+VACUOLE+golgi?+pm?	UNKNOWN	UNKNOWN	UNKNOWN	UNKNOWN	0.68334	0.68334	0.05134	1	0.3054	0.26756	0.00859	0.00538	0.08912	0.01835	0.12111	0.0034	0.03257	0.10356	0.00591	0.03903	0.57296	0.03784	0.551279
Q9S9L9	AT1G16180	Q9S9L9	Serinc-domain containing serine and sphingolipid biosynthesis protein	?VACUOLE+ER+golgi?	UNKNOWN	UNKNOWN	UNKNOWN	UNKNOWN	0.38889	0.38889	0.00717	0.85714	0.22745	0.43651	0.0073	0.00404	0.00499	0.06414	0.12086	0.00366	0.00413	0.0811	0.04252	0.0033	0.66396	0.20906	0.525153
Q9FYF7	AT1G67360	Q9FYF7	REF/SRPP-like protein At1g67360	?ER+VACUOLE+pm?	UNKNOWN	UNKNOWN	UNKNOWN	UNKNOWN	0.3496	0.3496	0.00412	1	0.48051	0.22431	0.00669	0.00521	0.04555	0.04389	0.03182	0.00449	0.00455	0.13138	0.00402	0.01758	0.70482	0.2562	0.524245
A0A1P8BHW3	AT5G45560	MFC19.23	Pleckstrin homology	?ER+VACUOLE+golgi?	UNKNOWN	UNKNOWN	UNKNOWN	UNKNOWN	0.45178	0.45178	0.00324	0.5119	0.42092	0.21872	0.011	0.00505	0.05357	0.01661	0.11935	0.00545	0.03612	0.03666	0.00448	0.07206	0.63964	0.2022	0.510305
Q9SII6	AT2G17220	PIX13	Probable serine/threonine-protein kinase PIX13	?VACUOLE+ER+pm	UNKNOWN	UNKNOWN	UNKNOWN	UNKNOWN	0.26894	0.26894	0.06174	0.72619	0.20156	0.4969	0.00446	0.00388	0.0038	0.02529	0.02953	0.00958	0.00552	0.19357	0.00751	0.0184	0.69846	0.29534	0.492177
Q8GYI7	AT5G19630	Q8GYI7	Alpha/beta-Hydrolases superfamily protein	?VACUOLE+er+pm+golgi?	UNKNOWN	UNKNOWN	UNKNOWN	UNKNOWN	0.36265	0.36265	0.12261	1	0.1902	0.44275	0.00586	0.0047	0.0194	0.02871	0.10673	0.00374	0.00361	0.18592	0.00423	0.00416	0.63295	0.25255	0.473098
Q84XF3	AT3G61760	DRP1B	Phragmoplastin DRP1B	?ER+PM+VACUOLE	UNKNOWN	UNKNOWN	UNKNOWN	UNKNOWN	0.70943	0.70943	0.2948	1	0.27608	0.22204	0.00764	0.00477	0.09973	0.04211	0.0811	0.00437	0.01305	0.23316	0.0036	0.01235	0.49812	0.05404	0.471202
Q9FGT8	AT5G58070	TIL	Temperature-induced lipocalin-1	?ER+vacuole	UNKNOWN	UNKNOWN	UNKNOWN	UNKNOWN	0.55035	0.55035	0.05407	1	0.44567	0.18053	0.01567	0.00408	0.05122	0.01184	0.07511	0.0038	0.0715	0.08949	0.0081	0.04299	0.6262	0.26514	0.460169
O64379	AT1G22750	O64379	AT1G22750 protein	?VACUOLE+GOLGI+er	UNKNOWN	UNKNOWN	UNKNOWN	UNKNOWN	0.38513	0.38513	0.02318	1	0.17786	0.46663	0.00515	0.0042	0.00626	0.00883	0.23382	0.00252	0.0025	0.07559	0.01161	0.00502	0.64449	0.28877	0.458381
O80924	AT2G37540	O80924	NAD(P)-binding Rossmann-fold superfamily protein	VACUOLE+golgi+er	UNKNOWN	UNKNOWN	UNKNOWN	UNKNOWN	0.08357	0.08357	0.00848	1	0.16588	0.55136	0.00707	0.00428	0.01186	0.00956	0.16805	0.00301	0.00549	0.02811	0.00512	0.04021	0.71724	0.38548	0.440758
A0A1P8AN90	AT1G79520	A0A1P8AN90	Cation efflux family protein	?GOLGI+ER+VACUOLE	UNKNOWN	UNKNOWN	UNKNOWN	UNKNOWN	0.40128	0.40128	0.02706	0.83333	0.21782	0.20815	0.00558	0.00462	0.01657	0.01026	0.48837	0.0025	0.00228	0.03036	0.00808	0.00541	0.42597	0.00967	0.421851
Q52K84	AT4G13270	Q52K84	At4g13270	VACUOLE+er	UNKNOWN	UNKNOWN	VACUOLE	ER	0	0.01513	0	0.84524	0.15353	0.58093	0.00524	0.00214	0.03762	0.04745	0.07246	0.00243	0.00261	0.05419	0.03659	0.00481	0.73446	0.4274	0.420552
O64621	AT2G18910	O64621	Expressed protein	?PM+VACUOLE+ER+unknown?	UNKNOWN	UNKNOWN	UNKNOWN	UNKNOWN	0.69787	0.69787	0.19213	0.64286	0.20086	0.21134	0.00609	0.00347	0.08129	0.04823	0.03255	0.0048	0.00443	0.28649	0.00867	0.11179	0.4122	0.01048	0.40788
Q5XPJ9	AT2G38440	SCAR2	Protein SCAR2	?ER+PM+vacuole+tgn?	UNKNOWN	UNKNOWN	UNKNOWN	UNKNOWN	0.61225	0.61225	0.03887	0.88095	0.33757	0.15298	0.00357	0.00265	0.01443	0.04686	0.01512	0.00497	0.00509	0.23777	0.10496	0.07405	0.49055	0.18459	0.399999
Q8GXN2	AT4G21680	NPF7.2	Protein NRT1/ PTR FAMILY 7.2	ER+PM+vacuole?	UNKNOWN	UNKNOWN	ER	PM	0.00041	0.19424	0.00041	1	0.51554	0.12838	0.00445	0.00447	0.00582	0.04964	0.0343	0.00311	0.00349	0.22517	0.02289	0.00274	0.64392	0.38716	0.39462
O80489	AT1G09180	SARA1A	small monomeric GTPase	?ER+vacuole?+peroxisome?	UNKNOWN	UNKNOWN	UNKNOWN	UNKNOWN	0.21145	0.21145	0.03328	0.7619	0.45627	0.12683	0.00745	0.00514	0.04274	0.08652	0.01539	0.00537	0.12562	0.07121	0.0085	0.04897	0.5831	0.32944	0.391004
Q8L7M7	AT1G17820	Q8L7M7	At1g17820	?ER+pm+extracellular?+vacuole?	UNKNOWN	UNKNOWN	UNKNOWN	UNKNOWN	0.40471	0.40471	0.01121	0.92857	0.40013	0.12581	0.00718	0.00639	0.08914	0.14921	0.03709	0.00487	0.00451	0.15927	0.00652	0.00985	0.52594	0.27432	0.381664
Q9SAH8	AT1G80830	NRAMP1	Metal transporter Nramp1	?VACUOLE+PM+extracellular+er?	UNKNOWN	UNKNOWN	UNKNOWN	UNKNOWN	0.72329	0.72329	0.15577	0.67857	0.14374	0.30156	0.00473	0.00359	0.04959	0.17401	0.0192	0.00515	0.00491	0.23403	0.0311	0.02838	0.4453	0.15782	0.375023
Q9LIK1	AT3G22950	ARFC1	ADP-ribosylation factor C1	?GOLGI+er+vacuole+cytosol?	UNKNOWN	UNKNOWN	UNKNOWN	UNKNOWN	0.57224	0.57224	0.06662	1	0.19219	0.17135	0.00869	0.00518	0.12137	0.01483	0.38054	0.00332	0.0064	0.07691	0.00464	0.01458	0.36354	0.02084	0.355964
Q8GWC3	AT5G05987	PRA1A2	PRA1 family protein A2	ER+GOLGI	UNKNOWN	UNKNOWN	ER	GOLGI	0	0.50664	0	1	0.47806	0.09212	0.00527	0.00572	0.01344	0.00631	0.3457	0.00267	0.00221	0.02969	0.0089	0.00991	0.57018	0.38594	0.350125
Q8RWL6	AT4G35780	STY17	Serine/threonine-protein kinase STY17	?PM+VACUOLE+er?	UNKNOWN	UNKNOWN	UNKNOWN	UNKNOWN	0.64362	0.64362	0.00845	0.5	0.13279	0.26063	0.01148	0.00528	0.00293	0.01191	0.02087	0.00549	0.02565	0.47507	0.00445	0.04345	0.39342	0.12784	0.343125
Q8LD89	AT4G38790	Q8LD89	ER lumen protein retaining receptor family protein	GOLGI+ER+vacuole?	UNKNOWN	UNKNOWN	GOLGI	ER	0	0.29004	0	0.63095	0.26299	0.13189	0.00615	0.00332	0.02524	0.00807	0.49403	0.00244	0.00187	0.02349	0.0219	0.01861	0.39488	0.1311	0.343111
Q8W4P9	AT3G28430	TT9	Protein TRANSPARENT TESTA 9	?ER+cytosol+extracellular?+pm?	UNKNOWN	UNKNOWN	UNKNOWN	UNKNOWN	0.33994	0.33994	0.04692	1	0.4186	0.08931	0.00863	0.00478	0.15572	0.14584	0.02081	0.00551	0.01511	0.10066	0.00604	0.02899	0.50791	0.32929	0.34066
Q9ZWA4	AT1G03820	F11M21.25	At1g03820	?ER+GOLGI+unknown	UNKNOWN	UNKNOWN	UNKNOWN	UNKNOWN	0.52993	0.52993	0.07001	0.85714	0.38942	0.08815	0.01447	0.00356	0.04306	0.04013	0.22257	0.00319	0.00539	0.01675	0.01744	0.15587	0.47757	0.30127	0.333692
Q8VXX9	AT4G14600	Q8VXX9	Bet1-like protein At4g14600	ER+pm?	UNKNOWN	UNKNOWN	ER	PM	1e-05	0.01447	1e-05	1	0.61365	0.08772	0.00477	0.00408	0.00543	0.02314	0.08708	0.00337	0.0022	0.14471	0.02163	0.0022	0.70137	0.52593	0.332498
Q8GXW8	AT1G04780	Q8GXW8	Ankyrin repeat family protein	?PM+ER+extracellular?+vacuole?	UNKNOWN	PM	UNKNOWN	UNKNOWN	0.68338	0.68338	0.02872	1	0.27308	0.11455	0.00682	0.00537	0.07574	0.1468	0.01753	0.0056	0.01443	0.28464	0.0061	0.04934	0.38763	0.15853	0.326179
Q39182	AT2G02100	PDF2.2	Defensin-like protein 2	?ER+GOLGI+cytosol?	UNKNOWN	UNKNOWN	UNKNOWN	UNKNOWN	0.44321	0.44321	0.01616	0.9881	0.44585	0.06998	0.00865	0.00566	0.14177	0.0218	0.25787	0.00409	0.00224	0.02471	0.00654	0.01084	0.51583	0.37587	0.321945
F4IVN6	AT2G27030	CAM5	Calmodulin 5	?ER+EXTRACELLULAR+golgi?+cytosol?	UNKNOWN	UNKNOWN	UNKNOWN	UNKNOWN	0.71649	0.71649	0.18675	0.7381	0.31338	0.09308	0.00886	0.00646	0.10595	0.22168	0.14383	0.0079	0.00888	0.07501	0.00405	0.01093	0.40646	0.2203	0.316917
Q8VYT1	AT1G66900	Q8VYT1	Alpha/beta-Hydrolases superfamily protein	?PEROXISOME+pm+vacuole+er?	UNKNOWN	UNKNOWN	UNKNOWN	UNKNOWN	0.83692	0.83692	0.46832	1	0.14981	0.173	0.02066	0.00285	0.08388	0.0614	0.01464	0.00406	0.22357	0.18033	0.00764	0.07817	0.32281	0.02319	0.315324
Q9FMQ5	AT5G22460	MWD9.26	Alpha/beta-Hydrolases superfamily protein	ER+golgi?	UNKNOWN	UNKNOWN	ER	GOLGI	1e-05	0.01579	1e-05	1	0.64654	0.07874	0.00439	0.01484	0.00274	0.00361	0.14282	0.00254	0.00217	0.08768	0.00773	0.00619	0.72528	0.5678	0.313466
Q9LF03	AT5G16250	Q9LF03	Transmembrane protein	?PM+UNKNOWN+er+vacuole?	UNKNOWN	UNKNOWN	UNKNOWN	UNKNOWN	0.71571	0.71571	0.28182	0.7619	0.18236	0.14164	0.00305	0.01618	0.0073	0.04863	0.02077	0.00411	0.06781	0.24373	0.02276	0.24167	0.324	0.04072	0.310807
A0A1P8AWL9	AT1G19970	A0A1P8AWL9	ER lumen protein retaining receptor family protein	GOLGI+ER+vacuole?	UNKNOWN	UNKNOWN	GOLGI	ER	0	0.25862	0	0.88095	0.21948	0.12213	0.00728	0.00407	0.03205	0.00599	0.50933	0.00202	0.00219	0.06388	0.02701	0.00457	0.34161	0.09735	0.308354
A0A1P8BBE5	AT5G01730	SCAR4	Protein SCAR	?UNKNOWN+peroxisome+er+vacuole?+pm?	UNKNOWN	UNKNOWN	UNKNOWN	UNKNOWN	0.72445	0.72445	0.13016	0.54762	0.16485	0.14758	0.00759	0.00457	0.02495	0.03543	0.01788	0.00635	0.17051	0.10362	0.01015	0.30652	0.31243	0.01727	0.307034
Q8VYK7	AT4G16520	ATG8F	Autophagy-related protein 8f	ER+unknown?	UNKNOWN	UNKNOWN	ER	UNKNOWN	0.00044	0.02605	0.00044	1	0.5415	0.05187	0.02285	0.00516	0.07422	0.0894	0.00805	0.00479	0.00559	0.07891	0.00763	0.11003	0.59337	0.48963	0.302838
Q9ZRP7	AT3G61580	SLD1	Delta(8)-fatty-acid desaturase 1	ER+PEROXISOME	UNKNOWN	UNKNOWN	ER	PEROXISOME	0	0.11544	0	0.88095	0.59035	0.0542	0.01795	0.00462	0.01822	0.01093	0.00739	0.00558	0.22208	0.03628	0.00594	0.02646	0.64455	0.53615	0.298975
Q501G9	AT4G33940	Q501G9	At4g33940	ER	UNKNOWN	UNKNOWN	ER	UNKNOWN	0	0	0	0.61905	0.65419	0.0648	0.00516	0.00474	0.03225	0.09736	0.04307	0.00329	0.00267	0.05441	0.01764	0.02043	0.71899	0.58939	0.295224
Q9LFJ7	AT5G17060	ARFB1B	ADP-ribosylation factor	?CYTOSOL+er+extracellular+vacuole?	UNKNOWN	UNKNOWN	UNKNOWN	UNKNOWN	0.65229	0.65229	0.18019	0.63095	0.1811	0.12898	0.00865	0.00447	0.31985	0.15882	0.06	0.0041	0.00856	0.06252	0.00647	0.05648	0.31008	0.05212	0.293919
Q9SBJ6	AT4G35950	ARAC6	Rac-like GTP-binding protein ARAC6	PM+ER	UNKNOWN	UNKNOWN	PM	ER	0	0.30993	0	0.97619	0.26576	0.08765	0.00356	0.00378	0.00368	0.01213	0.01243	0.00514	0.00259	0.58186	0.01222	0.00923	0.35341	0.17811	0.290464
P30302	AT2G37180	PIP2-3	Aquaporin PIP2-3	?PM+ER+vacuole?	UNKNOWN	UNKNOWN	UNKNOWN	UNKNOWN	0.45178	0.45178	0.03033	0.5	0.22371	0.10433	0.00362	0.00311	0.02028	0.08066	0.00868	0.0145	0.00729	0.51724	0.00685	0.00974	0.32804	0.11938	0.288879
A0A1P8B0K8	AT2G39110	PBL38	non-specific serine/threonine protein kinase	?PM+ER+unknown	UNKNOWN	UNKNOWN	UNKNOWN	UNKNOWN	0.60935	0.60935	0.01695	0.63095	0.31282	0.06551	0.00321	0.06158	0.0035	0.01287	0.02286	0.00711	0.00462	0.34886	0.00681	0.15026	0.37833	0.24731	0.284765
P40940	AT2G24765	ARF3	ADP-ribosylation factor 3	?ER+GOLGI+cytosol+pm?	UNKNOWN	UNKNOWN	UNKNOWN	UNKNOWN	0.64911	0.64911	0.10139	1	0.29735	0.07078	0.00738	0.00568	0.17942	0.03934	0.24435	0.0029	0.00434	0.10654	0.01203	0.02989	0.36813	0.22657	0.284723
Q9STW8	AT4G24260	KOR3	Endoglucanase 21	?EXTRACELLULAR+ER+tgn+pm?	UNKNOWN	UNKNOWN	UNKNOWN	UNKNOWN	0.69803	0.69803	0.02443	0.86905	0.29387	0.06601	0.00628	0.00388	0.03223	0.29403	0.02891	0.00294	0.00646	0.10372	0.1584	0.00327	0.35988	0.22786	0.277878
Q01474	AT1G56330	SAR1B	Small COPII coat GTPase SAR1B	PM+er+vacuole?	UNKNOWN	UNKNOWN	PM	ER	5e-05	0.19358	5e-05	1	0.1776	0.10386	0.00626	0.00283	0.05557	0.01942	0.05347	0.00444	0.0039	0.55892	0.00393	0.00979	0.28146	0.07374	0.260705
Q8GUI9	AT5G49900	Q8GUI9	Non-lysosomal glucosylceramidase	?CYTOSOL+ER+peroxisome?	UNKNOWN	UNKNOWN	UNKNOWN	UNKNOWN	0.61192	0.61192	0.10431	1	0.20366	0.08876	0.01146	0.00436	0.30602	0.05457	0.06289	0.00448	0.114	0.06438	0.00655	0.07888	0.29242	0.1149	0.258821
F4JN35	AT4G35580	NTL9	Protein NTM1-like 9	ER	UNKNOWN	UNKNOWN	ER	UNKNOWN	0	0	0	1	0.7465	0.05817	0.0044	0.00535	0.03741	0.04295	0.03401	0.00584	0.00328	0.04759	0.00364	0.01086	0.80467	0.68833	0.250791
Q4FE47	AT3G23280	XBAT35	Putative E3 ubiquitin-protein ligase XBAT35	?PEROXISOME+PM+ER	UNKNOWN	UNKNOWN	UNKNOWN	UNKNOWN	0.57685	0.57685	0.07209	1	0.20835	0.07738	0.00524	0.0044	0.01653	0.01695	0.01454	0.00675	0.3436	0.27136	0.00653	0.02837	0.28573	0.13097	0.248308
Q8W1S1	AT4G00550	DGD2	Digalactosyldiacylglycerol synthase 2, chloroplastic	?CYTOSOL+ER+EXTRACELLULAR	UNKNOWN	UNKNOWN	UNKNOWN	UNKNOWN	0.72534	0.72534	0.28486	1	0.21863	0.0714	0.01218	0.00478	0.23576	0.20798	0.02885	0.00467	0.07457	0.08	0.00662	0.05457	0.29003	0.14723	0.247329
Q3EDL4	AT1G01540	Q3EDL4	Probable serine/threonine-protein kinase At1g01540	PM+er	UNKNOWN	PM	PM	ER	1e-05	0.02952	1e-05	0.88095	0.15521	0.09955	0.00405	0.01287	0.00251	0.00845	0.01919	0.00395	0.02734	0.63555	0.00373	0.0276	0.25476	0.05566	0.24058
Q9C8Y1	AT1G66400	CML23	Probable calcium-binding protein CML23	PM+er?+vacuole?	UNKNOWN	UNKNOWN	PM	ER	0	0.02136	0	0.64286	0.13007	0.1112	0.00493	0.00337	0.0068	0.02463	0.00457	0.00373	0.01476	0.68328	0.00378	0.00888	0.24127	0.01887	0.236717
Q6NPQ1	AT5G18680	TULP11	Tubby-like F-box protein 11	PM+er	UNKNOWN	UNKNOWN	PM	ER	0	0.01528	0	0.88095	0.15825	0.08988	0.00452	0.00397	0.00244	0.00653	0.01811	0.00409	0.00549	0.69077	0.00462	0.01134	0.24813	0.06837	0.231165
Q9ZNT3	AT2G16700	ADF5	Actin-depolymerizing factor 5	PM+extracellular?+er?+vacuole?	UNKNOWN	UNKNOWN	PM	EXTRACELLULAR	0.00072	0.08089	0.00072	0.86905	0.12529	0.10815	0.00406	0.00444	0.02534	0.1372	0.0097	0.03336	0.00535	0.52909	0.00451	0.0135	0.23344	0.01714	0.229439
Q9FRH7	AT1G25280	TULP10	Tubby-like F-box protein 10	?EXTRACELLULAR+PM+vacuole?+er?+cytosol?	UNKNOWN	UNKNOWN	UNKNOWN	UNKNOWN	0.58687	0.58687	0.04139	0.64286	0.10581	0.12736	0.00951	0.00435	0.10412	0.30318	0.004	0.01068	0.04022	0.22039	0.00686	0.06351	0.23317	0.02155	0.228145
F4KFX5	AT5G40000	F4KFX5	AAA-ATPase At5g40000	PM+ER	UNKNOWN	UNKNOWN	PM	ER	0	0.15953	0	0.5119	0.22048	0.0528	0.00661	0.00878	0.00321	0.01455	0.00415	0.00307	0.00903	0.65097	0.00628	0.02008	0.27328	0.16768	0.227456
O04342	AT2G30530	MADA4	At2g30530/T6B20.12	?CYTOSOL+ER+golgi	UNKNOWN	UNKNOWN	UNKNOWN	UNKNOWN	0.43299	0.43299	0.07697	0.97619	0.20268	0.05696	0.00799	0.00452	0.3879	0.0939	0.17801	0.00474	0.00298	0.03697	0.0113	0.01205	0.25964	0.14572	0.221805
F4ITI0	AT2G19880	GCS	ceramide glucosyltransferase	ER	UNKNOWN	UNKNOWN	ER	UNKNOWN	0	0	0	0.64286	0.80488	0.05586	0.01999	0.00415	0.0096	0.00478	0.04277	0.00288	0.00423	0.00982	0.00458	0.03645	0.86074	0.74902	0.216029
Q9FIH5	AT5G42420	URGT3	UDP-rhamnose/UDP-galactose transporter 3	GOLGI+er	UNKNOWN	UNKNOWN	GOLGI	ER	0	0.00243	0	1	0.16976	0.06908	0.00458	0.00515	0.00505	0.00427	0.68317	0.00236	0.00244	0.03682	0.01045	0.00686	0.23884	0.10068	0.214794
O04478	AT1G65610	KOR2	Endoglucanase 7	?EXTRACELLULAR+TGN+vacuole?+er?	UNKNOWN	UNKNOWN	UNKNOWN	UNKNOWN	0.55088	0.55088	0.00882	1	0.10019	0.1184	0.00628	0.00414	0.01342	0.42577	0.01912	0.00289	0.01003	0.07568	0.21722	0.00685	0.21859	0.01821	0.214609
Q9ZQ71	AT2G03350	Q9ZQ71	At2g03350	?PM+CYTOSOL+EXTRACELLULAR+er	UNKNOWN	UNKNOWN	UNKNOWN	UNKNOWN	0.72616	0.72616	0.33011	1	0.18611	0.05951	0.00901	0.00547	0.22019	0.20954	0.00952	0.00575	0.00712	0.27505	0.00645	0.00628	0.24562	0.1266	0.214525
Q945Q1	AT5G12140	CYS1	Cysteine proteinase inhibitor 1	GOLGI+PM+er?	UNKNOWN	UNKNOWN	GOLGI	PM	9e-05	0.24606	9e-05	1	0.13645	0.08387	0.01056	0.00715	0.01271	0.0052	0.49453	0.00365	0.00313	0.2326	0.00486	0.00531	0.22032	0.05258	0.208736
Q8VZV6	AT5G19290	MAGL16	Alpha/beta-Hydrolases superfamily protein	?EXTRACELLULAR+er+pm?	UNKNOWN	UNKNOWN	UNKNOWN	UNKNOWN	0.26919	0.26919	0.01999	0.88095	0.15122	0.07367	0.03497	0.00397	0.0733	0.39391	0.00567	0.00492	0.0667	0.10969	0.00986	0.07212	0.22489	0.07755	0.20745
Q8LF21	AT1G14830	DRP1C	Phragmoplastin DRP1C	PM+er?	UNKNOWN	UNKNOWN	PM	UNKNOWN	0.00042	0.00042	0	1	0.13312	0.07781	0.0051	0.00395	0.00777	0.02388	0.05556	0.00438	0.00267	0.67917	0.00332	0.00326	0.21093	0.05531	0.199263
Q9M9P0	AT3G03220	EXPA13	Expansin-A13	?UNKNOWN+peroxisome+er+extracellular?	UNKNOWN	UNKNOWN	UNKNOWN	UNKNOWN	0.5936	0.5936	0.12455	0.64286	0.16751	0.05016	0.00754	0.00473	0.03797	0.11287	0.01758	0.00482	0.19476	0.04691	0.01662	0.33852	0.21767	0.11735	0.192126
Q8L788	AT4G33110	Q8L788	S-adenosyl-L-methionine-dependent methyltransferases superfamily protein	ER	UNKNOWN	UNKNOWN	ER	UNKNOWN	0	0	0	1	0.84467	0.05566	0.00416	0.00401	0.0062	0.00369	0.01713	0.00322	0.004	0.03731	0.00363	0.01632	0.90033	0.78901	0.189961
Q8VWI1	AT3G25040	ERD2B	ER lumen protein-retaining receptor B	GOLGI+er+cytosol?	UNKNOWN	ER	GOLGI	ER	1e-05	0.01958	1e-05	0.75	0.154	0.05068	0.0058	0.00387	0.10391	0.02108	0.61393	0.00279	0.00152	0.01612	0.01598	0.01032	0.20468	0.10332	0.183532
Q9SGN8	AT1G28400	Q9SGN8	F3M18.16	?GOLGI+unknown+er?	UNKNOWN	UNKNOWN	UNKNOWN	UNKNOWN	0.31679	0.31679	0.0182	1	0.13773	0.05084	0.01588	0.00462	0.09046	0.02198	0.43627	0.00365	0.02931	0.01459	0.00725	0.18743	0.18857	0.08689	0.172185
Q9LQ96	AT1G01630	Q9LQ96	Polyphosphoinositide binding protein, putative	?EXTRACELLULAR+PM+cytosol+er?	UNKNOWN	UNKNOWN	UNKNOWN	UNKNOWN	0.63349	0.63349	0.02431	0.88095	0.10884	0.07004	0.00758	0.00507	0.16708	0.32202	0.00743	0.00451	0.01236	0.28032	0.00704	0.00773	0.17888	0.0388	0.171939
Q9LM69	AT1G20823	ATL80	RING-H2 finger protein ATL80	?PM+extracellular+er?+tgn?	UNKNOWN	UNKNOWN	UNKNOWN	UNKNOWN	0.46714	0.46714	0.05778	0.92857	0.12831	0.05348	0.00517	0.00415	0.01405	0.19355	0.03138	0.00354	0.0054	0.44185	0.11633	0.00279	0.18179	0.07483	0.168187
Q9LDY7	AT4G11410	Q9LDY7	NAD(P)-binding Rossmann-fold superfamily protein	CYTOSOL+er?+extracellular?	UNKNOWN	UNKNOWN	CYTOSOL	ER	0.0005	0.07992	0.0005	0.7619	0.10897	0.05681	0.01101	0.00417	0.54116	0.10448	0.05411	0.00332	0.0365	0.03896	0.00566	0.03484	0.16578	0.05216	0.157133

## Sheet: 6. ER-Chl. LOPIT
protein_id	alt_ids	gene_name	description	prediction	train_organelle	suborganelle	pred_class1	pred_class2	p_val	p_val_single	p_val_dual	completeness	ER	CHLOROPLAST	MITOCHONDRION	CYTOSOL	EXTRACELLULAR	GOLGI	NUCLEUS	PEROXISOME	PM	TGN	UNKNOWN	VACUOLE	ER+Chl.	ER-Chl.	(ER+Chl.)*(1-ABS(ER-Chl.))
Q93ZB2	AT5G25900	KO	Ent-kaurene oxidase, chloroplastic	ER+CHLOROPLAST	UNKNOWN	UNKNOWN	ER	CHLOROPLAST	0	0.48167	0	1	0.49848	0.44249	0.0012	0.00105	0.0027	0.00247	0.00243	0.00885	0.03268	0.00286	0.00314	0.00165	0.94097	0.05599	0.888285
Q9SKA3	AT1G22610	MCTP6	Multiple C2 domain and transmembrane region protein 6	?ER+CHLOROPLAST+pm?	UNKNOWN	EXTRACELLULAR	UNKNOWN	UNKNOWN	0.61451	0.61451	0.01607	1	0.41616	0.36311	0.0024	0.00259	0.00461	0.01599	0.00493	0.06665	0.10594	0.00527	0.00931	0.00304	0.77927	0.05305	0.73793
Q9FI46	AT5G51020	CRL	Chromophore lyase CRL, chloroplastic	ER+CHLOROPLAST	UNKNOWN	UNKNOWN	ER	CHLOROPLAST	0	0.33424	0	1	0.53798	0.33894	0.00222	0.00075	0.03716	0.05656	0.00187	0.00332	0.00168	0.01403	0.00487	0.00063	0.87692	0.19904	0.702378
Q8LEV0	AT5G02590	Q8LEV0	Tetratricopeptide repeat	?CHLOROPLAST+ER+unknown?	UNKNOWN	UNKNOWN	UNKNOWN	UNKNOWN	0.44389	0.44389	0.02388	0.60714	0.3331	0.46075	0.00136	0.00127	0.00621	0.02598	0.00323	0.01849	0.01265	0.01024	0.12516	0.00156	0.79385	0.12765	0.692515
A0A1P8B9B2	AT4G16380	A0A1P8B9B2	Heavy metal transport/detoxification superfamily protein	?CHLOROPLAST+ER+pm?	UNKNOWN	UNKNOWN	UNKNOWN	UNKNOWN	0.40296	0.40296	0.00132	1	0.30794	0.45709	0.00221	0.00218	0.00519	0.01432	0.00489	0.06852	0.12186	0.00544	0.00663	0.00375	0.76503	0.14915	0.650926
Q9ZU35	AT2G01320	ABCG7	ABC transporter G family member 7	CHLOROPLAST+ER	UNKNOWN	UNKNOWN	CHLOROPLAST	ER	0	0.13112	0	1	0.31503	0.64612	0.0011	0.00071	0.00347	0.00756	0.0021	0.00916	0.00659	0.00441	0.00249	0.00127	0.96115	0.33109	0.642923
Q9FJH5	AT5G60800	HIPP03	Heavy metal-associated isoprenylated plant protein 3	ER+CHLOROPLAST	UNKNOWN	UNKNOWN	ER	CHLOROPLAST	0	0.3329	0	1	0.49861	0.29039	0.00162	0.00446	0.00972	0.07622	0.00331	0.02745	0.0095	0.00472	0.06945	0.00454	0.789	0.20822	0.624714
Q9C8H3	AT1G51570	FTIP4	FT-interacting protein 4	ER+CHLOROPLAST	UNKNOWN	EXTRACELLULAR	ER	CHLOROPLAST	1e-05	0.36105	1e-05	1	0.57702	0.28905	0.00257	0.00145	0.00282	0.02014	0.00415	0.03429	0.05329	0.00477	0.0083	0.00214	0.86607	0.28797	0.616668
Q0WPE9	AT1G60030	NAT7	Nucleobase-ascorbate transporter 7	?CHLOROPLAST+ER+PM	UNKNOWN	UNKNOWN	UNKNOWN	UNKNOWN	0.39082	0.39082	0.04969	1	0.25982	0.49102	0.00205	0.0012	0.00318	0.0136	0.00274	0.00709	0.20581	0.00215	0.00693	0.00443	0.75084	0.2312	0.577246
Q9FJG3	AT5G17980	MCTP16	Multiple C2 domain and transmembrane region protein 16	?ER+PM+CHLOROPLAST	UNKNOWN	UNKNOWN	UNKNOWN	UNKNOWN	0.66359	0.66359	0.09664	1	0.39394	0.26109	0.00285	0.00163	0.00408	0.01417	0.00413	0.0138	0.28899	0.00316	0.00883	0.00334	0.65503	0.13285	0.568009
F4JYV3	AT5G54170	F4JYV3	Polyketide cyclase/dehydrase and lipid transport superfamily protein	?CHLOROPLAST+ER+extracellular?	UNKNOWN	UNKNOWN	UNKNOWN	UNKNOWN	0.42725	0.42725	0.0398	0.60714	0.24416	0.4354	0.00181	0.02177	0.14301	0.05807	0.00517	0.03605	0.03138	0.00625	0.01256	0.00436	0.67956	0.19124	0.549601
Q9S784	AT1G69700	HVA22C	HVA22-like protein c	ER+CHLOROPLAST	UNKNOWN	UNKNOWN	ER	CHLOROPLAST	0	0.08512	0	1	0.66802	0.25573	0.00208	0.0012	0.00213	0.00951	0.00298	0.01565	0.03014	0.00337	0.00734	0.00184	0.92375	0.41229	0.542897
F4JZL7	AT5G19090	HIPP33	Heavy metal-associated isoprenylated plant protein 33	?CHLOROPLAST+ER+golgi	UNKNOWN	UNKNOWN	UNKNOWN	UNKNOWN	0.49246	0.49246	0.11825	1	0.23623	0.4186	0.00433	0.00316	0.00362	0.16156	0.00561	0.06893	0.05611	0.00734	0.02987	0.00463	0.65483	0.18237	0.535409
Q8GXV7	AT5G43980	PDLP1	Plasmodesmata-located protein 1	?ER+PM+CHLOROPLAST	UNKNOWN	UNKNOWN	UNKNOWN	UNKNOWN	0.52103	0.52103	0.03508	1	0.45931	0.22996	0.00221	0.00101	0.0049	0.00469	0.00296	0.00984	0.27149	0.00685	0.00452	0.00224	0.68927	0.22935	0.531186
Q9FI03	AT5G53730	NHL26	NDR1/HIN1-like protein 26	?ER+CHLOROPLAST+GOLGI	UNKNOWN	UNKNOWN	UNKNOWN	UNKNOWN	0.35276	0.35276	0.03848	1	0.50565	0.21872	0.00422	0.00136	0.00707	0.20679	0.00268	0.02321	0.00299	0.00938	0.01514	0.0028	0.72437	0.28693	0.516527
Q8VY85	AT2G06010	ORG4	OBP3-responsive protein 4	?PEROXISOME+CHLOROPLAST+ER	UNKNOWN	UNKNOWN	UNKNOWN	UNKNOWN	0.59763	0.59763	0.16976	1	0.25547	0.2569	0.00152	0.00563	0.01057	0.00696	0.00646	0.38537	0.03559	0.02047	0.01189	0.00318	0.51237	0.00143	0.511637
Q9SS68	AT3G03680	MCTP14	Multiple C2 domain and transmembrane region protein 14	?GOLGI+ER+CHLOROPLAST	UNKNOWN	UNKNOWN	UNKNOWN	UNKNOWN	0.69417	0.69417	0.26272	1	0.25516	0.24937	0.00551	0.00366	0.00316	0.32231	0.0056	0.02168	0.02988	0.00816	0.09185	0.00366	0.50453	0.00579	0.501609
A0A178VYC5	AT2G01660	PDLP6	Plasmodesmata-located protein 6	?CHLOROPLAST+ER+UNKNOWN+golgi	UNKNOWN	UNKNOWN	UNKNOWN	UNKNOWN	0.72428	0.72428	0.37116	1	0.23353	0.30486	0.003	0.00337	0.00475	0.16254	0.00634	0.00272	0.05697	0.00879	0.21017	0.00297	0.53839	0.07133	0.499987
Q8RWE9	AT5G49990	NAT5	Nucleobase-ascorbate transporter 5	?CHLOROPLAST+PM+ER	UNKNOWN	UNKNOWN	UNKNOWN	UNKNOWN	0.44333	0.44333	0.0397	0.61905	0.2083	0.45181	0.00198	0.00211	0.00591	0.00359	0.00397	0.03713	0.27223	0.00413	0.0043	0.00454	0.66011	0.24351	0.499367
Q56ZM7	AT5G05365	Q56ZM7	Heavy metal transport/detoxification superfamily protein	ER+CHLOROPLAST	UNKNOWN	UNKNOWN	ER	CHLOROPLAST	0	0.04653	0	1	0.65784	0.22077	0.0018	0.00248	0.00427	0.01753	0.00352	0.02717	0.00809	0.00411	0.05038	0.00203	0.87861	0.43707	0.494596
Q27GI3	AT5G62890	NAT6	Nucleobase-ascorbate transporter 6	?ER+PM+chloroplast	UNKNOWN	UNKNOWN	UNKNOWN	UNKNOWN	0.62159	0.62159	0.09601	1	0.43994	0.19354	0.00364	0.0022	0.00413	0.01544	0.00436	0.09266	0.22176	0.00619	0.01053	0.0056	0.63348	0.2464	0.477391
F4JPE9	AT4G23950	SUN5	SUN domain-containing protein 5	?ER+chloroplast+unknown+golgi?	UNKNOWN	UNKNOWN	UNKNOWN	UNKNOWN	0.31699	0.31699	0.03231	0.75	0.49175	0.17986	0.00277	0.00285	0.00816	0.13239	0.00355	0.00232	0.0071	0.00607	0.16063	0.00256	0.67161	0.31189	0.462142
Q3EDE7	AT1G10990	Q3EDE7	Transmembrane protein	CHLOROPLAST+ER	UNKNOWN	UNKNOWN	CHLOROPLAST	ER	0	0.00314	0	1	0.21453	0.74639	0.00081	0.00073	0.00276	0.01039	0.00131	0.00228	0.01131	0.00238	0.00566	0.00144	0.96092	0.53186	0.449845
Q9C5D3	AT5G63530	HIPP07	Heavy metal-associated isoprenylated plant protein 7	?CHLOROPLAST+GOLGI+er	UNKNOWN	UNKNOWN	UNKNOWN	UNKNOWN	0.5583	0.5583	0.05499	1	0.17384	0.38844	0.00519	0.00328	0.00294	0.26579	0.00435	0.01001	0.05536	0.00659	0.08015	0.00407	0.56228	0.2146	0.441615
Q9ZV24	AT2G28900	OEP161	Outer envelope pore protein 16-1, chloroplastic	CHLOROPLAST+ER	CHLOROPLAST	PLASTID MEMBRANE	CHLOROPLAST	ER	0	0.00193	0	1	0.20308	0.74642	0.00115	0.00058	0.00382	0.02325	0.00251	0.00946	0.00313	0.00307	0.00246	0.00105	0.9495	0.54334	0.433599
Q9SRN0	AT3G11660	NHL1	NDR1/HIN1-like protein 1	ER+pm+chloroplast?	UNKNOWN	UNKNOWN	ER	PM	0.00032	0.14781	0.00032	1	0.57924	0.14388	0.00399	0.00184	0.00357	0.04786	0.00383	0.00712	0.18634	0.00464	0.01267	0.00503	0.72312	0.43536	0.408302
Q93Y07	AT3G06510	SFR2	Galactolipid galactosyltransferase SFR2, chloroplastic	CHLOROPLAST+er?+peroxisome?	UNKNOWN	PLASTID MEMBRANE	CHLOROPLAST	ER	2e-05	0.0067	2e-05	1	0.14846	0.61968	0.00203	0.00146	0.01149	0.07014	0.00688	0.11896	0.00492	0.00834	0.00572	0.00194	0.76814	0.47122	0.406177
Q9LVH5	AT3G17970	OEP64	Outer envelope protein 64, chloroplastic	CHLOROPLAST+peroxisome+er?	UNKNOWN	PLASTID MEMBRANE	CHLOROPLAST	PEROXISOME	0	0.0957	0	1	0.1287	0.58121	0.00152	0.00229	0.01325	0.03639	0.0083	0.19416	0.00633	0.00752	0.01807	0.00225	0.70991	0.45251	0.388669
F4HTQ1	AT1G67690	F4HTQ1	Probable thimet oligopeptidase	CHLOROPLAST+er	UNKNOWN	UNKNOWN	CHLOROPLAST	UNKNOWN	9e-05	9e-05	0	1	0.17048	0.75983	0.00077	0.00115	0.00389	0.01232	0.00245	0.01491	0.00667	0.00276	0.02346	0.00132	0.93031	0.58935	0.382032
Q9M2R0	AT3G57880	FTIP3	FT-interacting protein 3	?ER+golgi+pm?+chloroplast?	UNKNOWN	EXTRACELLULAR	UNKNOWN	UNKNOWN	0.45645	0.45645	0.01953	1	0.49991	0.11704	0.00626	0.00264	0.00347	0.18534	0.00479	0.00648	0.12792	0.00727	0.0346	0.00427	0.61695	0.38287	0.380738
Q9LZF1	AT5G03380	HIPP06	Heavy metal-associated isoprenylated plant protein 6	?ER+PM+chloroplast+unknown?+golgi?	UNKNOWN	UNKNOWN	UNKNOWN	UNKNOWN	0.75012	0.75012	0.2359	1	0.25532	0.16304	0.00317	0.00854	0.01099	0.12916	0.00742	0.01905	0.24856	0.00581	0.14193	0.00701	0.41836	0.09228	0.379754
Q9FVX3	AT1G77350	Q9FVX3	At1g77350/F2P24_6	ER+GOLGI+chloroplast?	UNKNOWN	UNKNOWN	ER	GOLGI	0	0.09999	0	0.83333	0.61244	0.1262	0.00434	0.00106	0.00352	0.21177	0.00475	0.01345	0.00435	0.00736	0.0086	0.00215	0.73864	0.48624	0.379484
F4K020	AT5G42100	BG_PPAP	glucan endo-1,3-beta-D-glucosidase	?EXTRACELLULAR+CHLOROPLAST+er+golgi	UNKNOWN	UNKNOWN	UNKNOWN	UNKNOWN	0.6545	0.6545	0.13141	0.86905	0.1564	0.27242	0.0037	0.001	0.38201	0.15032	0.00451	0.0159	0.00364	0.00567	0.00334	0.00108	0.42882	0.11602	0.379068
F4J510	AT3G10970	F4J510	Haloacid dehalogenase-like hydrolase	CHLOROPLAST+er?+unknown?	UNKNOWN	UNKNOWN	CHLOROPLAST	ER	2e-05	0.00211	2e-05	0.86905	0.12784	0.6476	0.00073	0.00378	0.02456	0.00329	0.00343	0.01118	0.05409	0.01313	0.10679	0.00359	0.77544	0.51976	0.372397
Q9C529	AT1G60870	MEE9	Maternal effect embryo arrest 9	CHLOROPLAST+pm+er?	UNKNOWN	EXTRACELLULAR	CHLOROPLAST	PM	7e-05	0.00465	7e-05	1	0.13355	0.67343	0.00148	0.00121	0.00382	0.00295	0.0029	0.01839	0.15357	0.00242	0.00304	0.00325	0.80698	0.53988	0.371308
Q949S4	AT1G14340	BPL3	RNA-binding	CHLOROPLAST+pm+er?	UNKNOWN	UNKNOWN	CHLOROPLAST	PM	4e-05	0.03776	4e-05	0.60714	0.11407	0.60292	0.00263	0.00211	0.00311	0.01321	0.00384	0.00265	0.18386	0.00413	0.06485	0.00263	0.71699	0.48885	0.366489
Q9C568	AT5G22200	Q9C568	Late embryogenesis abundant	PM+CHLOROPLAST+er?	UNKNOWN	UNKNOWN	PM	CHLOROPLAST	0.0009	0.40434	0.0009	1	0.14173	0.28549	0.00247	0.00306	0.00633	0.01746	0.00472	0.02422	0.48132	0.00339	0.02531	0.00451	0.42722	0.14376	0.365803
Q9SLF3	AT2G16640	TOC132	Translocase of chloroplast 132, chloroplastic	CHLOROPLAST+er	UNKNOWN	PLASTID MEMBRANE	CHLOROPLAST	UNKNOWN	5e-05	5e-05	0	1	0.15932	0.76722	0.00116	0.00079	0.00416	0.00602	0.0032	0.04116	0.00635	0.00324	0.00594	0.00143	0.92654	0.6079	0.363296
F4IBS8	AT1G78620	VTE6	Protein VTE6, chloroplastic	CHLOROPLAST+er	UNKNOWN	PLASTID MEMBRANE	CHLOROPLAST	UNKNOWN	0.00032	0.00032	0	1	0.15718	0.76765	0.00064	0.00198	0.01297	0.03645	0.00166	0.00554	0.00491	0.00334	0.00639	0.00129	0.92483	0.61047	0.360249
Q8RWX4	AT4G32250	KOC1	Protein KINASE OF THE OUTER CHLOROPLAST MEMBRANE 1	CHLOROPLAST+peroxisome+er?	UNKNOWN	UNKNOWN	CHLOROPLAST	PEROXISOME	0.00012	0.0144	0.00012	1	0.11089	0.6268	0.00126	0.00229	0.00975	0.02781	0.00698	0.15126	0.00704	0.00727	0.04666	0.002	0.73769	0.51591	0.357108
F4J220	AT3G50920	LPPE1	Lipid phosphate phosphatase epsilon 1, chloroplastic	?PM+ER+chloroplast?	UNKNOWN	UNKNOWN	UNKNOWN	UNKNOWN	0.41529	0.41529	0.01576	0.83333	0.23929	0.14793	0.00166	0.00233	0.01258	0.00981	0.00446	0.01788	0.5378	0.00428	0.01796	0.004	0.38722	0.09136	0.351844
Q9LXS2	AT3G58800	T20N10_150	Secretion-regulating guanine nucleotide exchange factor	?CHLOROPLAST+EXTRACELLULAR+unknown+er?	UNKNOWN	UNKNOWN	UNKNOWN	UNKNOWN	0.59264	0.59264	0.1596	0.61905	0.11303	0.32685	0.00284	0.00363	0.30402	0.06728	0.00419	0.00266	0.00576	0.01058	0.15765	0.0015	0.43988	0.21382	0.345825
F4I5D7	AT1G70280	F4I5D7	NHL domain-containing protein	ER+chloroplast?	UNKNOWN	UNKNOWN	ER	CHLOROPLAST	0	0.00106	0	1	0.78657	0.1487	0.00289	0.00077	0.00257	0.0163	0.00215	0.00626	0.02414	0.00467	0.00377	0.00121	0.93527	0.63787	0.338689
A0A1I9LMQ7	AT3G23710	TIC22-III	Tic22-like family protein	ER+chloroplast?	UNKNOWN	UNKNOWN	ER	CHLOROPLAST	0.00028	0.0025	0.00028	0.75	0.66253	0.10038	0.00252	0.00199	0.02341	0.07652	0.00492	0.09941	0.006	0.00957	0.01015	0.00261	0.76291	0.56215	0.33404
Q9C8J8	AT1G51460	ABCG13	ABC transporter G family member 13	CHLOROPLAST+er?	UNKNOWN	UNKNOWN	CHLOROPLAST	UNKNOWN	1e-05	1e-05	0	1	0.1348	0.76634	0.00107	0.00103	0.00756	0.01044	0.003	0.05704	0.00719	0.00592	0.00391	0.00171	0.90114	0.63154	0.332034
Q9FGI3	AT5G37540	MPA22.8	AT5g37540/mpa22_p_70	?ER+unknown	UNKNOWN	UNKNOWN	UNKNOWN	UNKNOWN	0.44031	0.44031	0.00417	0.61905	0.45568	0.07241	0.00899	0.00132	0.02465	0.07311	0.06056	0.06999	0.00366	0.03107	0.19726	0.00131	0.52809	0.38327	0.325689
Q9S845	AT1G76340	GONST3	GDP-mannose transporter GONST3	?TGN+chloroplast+er	UNKNOWN	UNKNOWN	UNKNOWN	UNKNOWN	0.11615	0.11615	0.0094	0.95238	0.1542	0.1768	0.00245	0.00142	0.00777	0.06728	0.0017	0.02932	0.00339	0.53728	0.01711	0.00128	0.331	0.0226	0.323519
O22960	AT2G34070	TBL37	Protein trichome birefringence-like 37	?ER+UNKNOWN	UNKNOWN	UNKNOWN	UNKNOWN	UNKNOWN	0.61775	0.61775	0.00334	0.7381	0.36469	0.08338	0.0027	0.00846	0.08123	0.07093	0.00569	0.07253	0.01074	0.0088	0.28617	0.00469	0.44807	0.28131	0.322023
F4KH40	AT5G24360	IRE1-1	non-specific serine/threonine protein kinase	ER	UNKNOWN	UNKNOWN	ER	UNKNOWN	0.00019	0.00019	0	0.88095	0.70491	0.09957	0.00545	0.00264	0.00205	0.00651	0.00264	0.01937	0.06645	0.00382	0.06716	0.01943	0.80448	0.60534	0.317496
Q9MA83	AT3G05360	RLP30	Receptor-like protein 30	ER+chloroplast?	UNKNOWN	UNKNOWN	ER	UNKNOWN	0	0	0	0.63095	0.81481	0.13641	0.0021	0.00098	0.01272	0.00611	0.00123	0.00536	0.00321	0.00451	0.01145	0.00111	0.95122	0.6784	0.305912
Q93VG3	AT5G19120	Q93VG3	AT5g19120/T24G5_20	GOLGI+ER	UNKNOWN	UNKNOWN	GOLGI	ER	0	0.45483	0	0.95238	0.3394	0.07013	0.00219	0.00091	0.00856	0.51014	0.00328	0.00218	0.00574	0.03984	0.01599	0.00164	0.40953	0.26927	0.299256
Q9LUS2	AT3G16620	TOC120	Translocase of chloroplast 120, chloroplastic	CHLOROPLAST+er?	UNKNOWN	UNKNOWN	CHLOROPLAST	UNKNOWN	0	0	0	0.9881	0.12361	0.80976	0.00118	0.00058	0.00462	0.01866	0.00272	0.02664	0.00386	0.00346	0.00358	0.00132	0.93337	0.68615	0.292938
Q9LFG3	AT3G53560	F4P12_260	Tetratricopeptide repeat	?GOLGI+CHLOROPLAST+er?	UNKNOWN	UNKNOWN	UNKNOWN	UNKNOWN	0.24384	0.24384	0.00727	1	0.10874	0.20178	0.00338	0.00685	0.0942	0.46248	0.00554	0.07198	0.00479	0.00726	0.02945	0.00355	0.31052	0.09304	0.281629
A0A1P8B0K8	AT2G39110	PBL38	non-specific serine/threonine protein kinase	?PM+ER+unknown	UNKNOWN	UNKNOWN	UNKNOWN	UNKNOWN	0.60935	0.60935	0.01695	0.63095	0.31282	0.06158	0.00321	0.0035	0.01287	0.02286	0.00711	0.00462	0.34886	0.00681	0.15026	0.06551	0.3744	0.25124	0.280336
F4JUW0	AT4G20380	LSD1	LSD1 zinc finger family protein	PM+ER	UNKNOWN	UNKNOWN	PM	ER	1e-05	0.2582	1e-05	0.86905	0.22747	0.08635	0.00905	0.00213	0.0047	0.02471	0.00503	0.03119	0.58009	0.00658	0.01926	0.00343	0.31382	0.14112	0.269534
Q9SWS1	AT5G38630	CYB561B	Transmembrane ascorbate ferrireductase 2	ER+golgi	UNKNOWN	UNKNOWN	ER	GOLGI	0	0.00395	0	0.9881	0.72532	0.05564	0.00939	0.00115	0.00653	0.16201	0.00328	0.01831	0.00157	0.0071	0.00756	0.00215	0.78096	0.66968	0.257967
Q84W75	AT1G29090	Q84W75	Cysteine proteinases superfamily protein	GOLGI+er?+chloroplast?	UNKNOWN	UNKNOWN	UNKNOWN	UNKNOWN	0.05942	0.05942	0.00238	1	0.12436	0.10998	0.009	0.00121	0.00433	0.59012	0.00362	0.08705	0.00632	0.05396	0.00808	0.00196	0.23434	0.01438	0.23097
Q9LQ10	AT1G62960	ACS10	Probable aminotransferase ACS10	?PEROXISOME+ER+unknown?	UNKNOWN	UNKNOWN	UNKNOWN	UNKNOWN	0.24745	0.24745	0.02671	0.53571	0.20019	0.05117	0.00345	0.00224	0.0058	0.00825	0.00556	0.52573	0.02542	0.02961	0.13954	0.00304	0.25136	0.14902	0.213902
Q9SQV0	AT3G06470	ELO2	very-long-chain 3-oxoacyl-CoA synthase	ER	UNKNOWN	UNKNOWN	ER	UNKNOWN	0	0	0	0.9881	0.87627	0.08658	0.00169	0.00102	0.00975	0.00475	0.00133	0.00296	0.00504	0.00175	0.00679	0.00207	0.96285	0.78969	0.202497
F4KDC7	AT5G51710	KEA5	K+ efflux antiporter 5	GOLGI+er?	UNKNOWN	UNKNOWN	GOLGI	UNKNOWN	0.00074	0.00074	0	0.60714	0.13643	0.0724	0.00517	0.00114	0.00547	0.72242	0.00328	0.01251	0.00208	0.00853	0.02853	0.00203	0.20883	0.06403	0.195459
O80986	AT2G26110	O80986	At2g26110	ER	UNKNOWN	UNKNOWN	ER	UNKNOWN	0	0	0	0.60714	0.86476	0.0722	0.00152	0.00088	0.00246	0.00169	0.00146	0.01039	0.01738	0.01203	0.01378	0.00147	0.93696	0.79256	0.194363
Q9M221	AT3G60380	T8B10_40	Cotton fiber protein	PM+er?	UNKNOWN	UNKNOWN	PM	ER	0	0.00157	0	0.85714	0.13326	0.06034	0.00427	0.00267	0.0098	0.0568	0.01271	0.00339	0.6407	0.00666	0.06576	0.00364	0.1936	0.07292	0.179483
O49362	AT4G32290	O49362	At4g32290	?GOLGI+unknown?+tgn?+er?	UNKNOWN	UNKNOWN	UNKNOWN	UNKNOWN	0.15823	0.15823	0.01596	0.63095	0.10968	0.05305	0.00404	0.00195	0.00336	0.52785	0.00217	0.00504	0.00648	0.13287	0.14941	0.0041	0.16273	0.05663	0.153515

## Sheet: 7. ER-Mit. LOPIT
protein_id	alt_ids	gene_name	description	prediction	train_organelle	suborganelle	pred_class1	pred_class2	p_val	p_val_single	p_val_dual	completeness	ER	MITOCHONDRION	CHLOROPLAST	CYTOSOL	EXTRACELLULAR	GOLGI	NUCLEUS	PEROXISOME	PM	TGN	UNKNOWN	VACUOLE	ER+Mit.	ER-Mit.	(ER+Mit.)*(1-ABS(ER-Mit.))
Q9ZNT1	AT5G17770	CBR1	NADH--cytochrome b5 reductase 1	MITOCHONDRION+ER	UNKNOWN	MOM	MITOCHONDRION	ER	0	0.47653	0	1	0.43261	0.48468	0.00421	0.00366	0.00571	0.0051	0.00352	0.02292	0.02073	0.00931	0.00318	0.00437	0.91729	0.05207	0.869527
Q67YN2	AT5G41940	MJC20.4	GTPase activator protein of Rab-like small GTPases-like protein	MITOCHONDRION+ER	UNKNOWN	UNKNOWN	MITOCHONDRION	ER	0	0.5139	0	1	0.42609	0.43961	0.00365	0.00529	0.00673	0.00455	0.0035	0.06166	0.02733	0.01174	0.0051	0.00473	0.8657	0.01352	0.853996
Q1H5E3	AT5G16870	Q1H5E3	peptidyl-tRNA hydrolase	ER+MITOCHONDRION	UNKNOWN	UNKNOWN	ER	MITOCHONDRION	0	0.4042	0	1	0.53782	0.37379	0.00418	0.00426	0.00536	0.00491	0.00329	0.02441	0.02393	0.00905	0.00343	0.00558	0.91161	0.16403	0.762079
Q9ZPF5	AT4G08870	ARGAH2	Arginase 2, chloroplastic/mitochondrial	MITOCHONDRION+ER	UNKNOWN	UNKNOWN	MITOCHONDRION	ER	0	0.29548	0	0.72619	0.34118	0.58596	0.00456	0.00179	0.00649	0.03276	0.00261	0.0029	0.00487	0.01199	0.00273	0.00216	0.92714	0.24478	0.700195
O82812	AT2G46000	O82812	At2g46000	ER+MITOCHONDRION+extracellular?	UNKNOWN	UNKNOWN	ER	MITOCHONDRION	0	0.43349	0	0.88095	0.51704	0.32701	0.00455	0.00364	0.10279	0.00473	0.00258	0.00629	0.0145	0.01134	0.00227	0.00326	0.84405	0.19003	0.683655
Q9LFV7	AT5G15690	Q9LFV7	Zinc ion binding protein	MITOCHONDRION+ER	UNKNOWN	UNKNOWN	MITOCHONDRION	ER	1e-05	0.34936	1e-05	1	0.30658	0.51784	0.00817	0.00249	0.0034	0.09985	0.00298	0.00273	0.01163	0.01139	0.0289	0.00403	0.82442	0.21126	0.650253
Q8LGI2	AT5G39410	Q8LGI2	Probable mitochondrial saccharopine dehydrogenase-like oxidoreductase At5g39410	ER+MITOCHONDRION	UNKNOWN	UNKNOWN	ER	MITOCHONDRION	0	0.34216	0	1	0.509	0.28377	0.00421	0.00716	0.00682	0.00251	0.00441	0.0887	0.0671	0.01192	0.00404	0.01036	0.79277	0.22523	0.614214
C0LGJ1	AT1G74360	C0LGJ1	Probable LRR receptor-like serine/threonine-protein kinase At1g74360	?MITOCHONDRION+ER+EXTRACELLULAR	UNKNOWN	UNKNOWN	UNKNOWN	UNKNOWN	0.5792	0.5792	0.20989	0.61905	0.29152	0.36544	0.0041	0.00313	0.246	0.00603	0.0029	0.00654	0.01473	0.05468	0.00274	0.00218	0.65696	0.07392	0.608398
Q93YN4	AT5G22350	ELM1	Mitochondrial fission protein ELM1	MITOCHONDRION+ER	UNKNOWN	MOM	MITOCHONDRION	ER	0	0.1283	0	1	0.28984	0.63668	0.0038	0.0028	0.00588	0.01668	0.00256	0.00718	0.01908	0.00622	0.00566	0.00362	0.92652	0.34684	0.605166
Q9ZS96	AT4G04775	Q9ZS96	Uncharacterized protein At4g04775	?ER+PEROXISOME+MITOCHONDRION	UNKNOWN	UNKNOWN	UNKNOWN	UNKNOWN	0.64191	0.64191	0.23112	1	0.32055	0.26565	0.00298	0.00584	0.01077	0.00477	0.0043	0.30456	0.03793	0.03094	0.00419	0.00751	0.5862	0.0549	0.554018
A0A1P8BH10	AT5G50130	MPF21.15	NAD(P)-binding Rossmann-fold superfamily protein	?MITOCHONDRION+pm+er+unknown?	UNKNOWN	UNKNOWN	UNKNOWN	UNKNOWN	0.51775	0.51775	0.1656	0.5	0.18183	0.41105	0.00647	0.00895	0.00475	0.00912	0.00499	0.03879	0.19075	0.00708	0.11846	0.01775	0.59288	0.22922	0.45698
A0A1I9LQR3	AT3G58830	PGPP1	Haloacid dehalogenase	?MITOCHONDRION+er+pm+peroxisome?+unknown?	UNKNOWN	UNKNOWN	UNKNOWN	UNKNOWN	0.63515	0.63515	0.31109	0.52381	0.1934	0.33346	0.00471	0.00691	0.00692	0.00465	0.00466	0.14953	0.1514	0.01315	0.10481	0.0264	0.52686	0.14006	0.453068
O22807	AT2G33570	GALS1	Galactan beta-1,4-galactosyltransferase GALS1	?MITOCHONDRION+TGN+er	UNKNOWN	EXTRACELLULAR	UNKNOWN	UNKNOWN	0.55065	0.55065	0.05184	0.63095	0.17538	0.36815	0.00342	0.00223	0.08161	0.03251	0.00246	0.01322	0.00229	0.29839	0.01871	0.00164	0.54353	0.19277	0.438754
F4IJJ8	AT2G22530	F4IJJ8	GPI ethanolamine phosphate transferase 2	ER+mitochondrion	UNKNOWN	UNKNOWN	ER	MITOCHONDRION	0	0.00424	0	0.88095	0.74943	0.19762	0.00533	0.00193	0.01028	0.00697	0.00223	0.0084	0.00405	0.00813	0.00356	0.00208	0.94705	0.55181	0.424458
Q8RXP6	AT5G20520	WAV2	Alpha/beta hydrolase domain-containing protein WAV2	ER+mitochondrion	UNKNOWN	UNKNOWN	ER	MITOCHONDRION	0	0.00164	0	1	0.74851	0.17383	0.0063	0.00339	0.00374	0.00368	0.00416	0.03352	0.00714	0.00755	0.00428	0.0039	0.92234	0.57468	0.39229
Q8GXY6	AT1G05270	YUP8H12.12	At1g05270	MITOCHONDRION+PEROXISOME+er?	UNKNOWN	MOM	MITOCHONDRION	PEROXISOME	0.00051	0.55372	0.00051	1	0.10605	0.40539	0.00259	0.00555	0.00884	0.04049	0.00492	0.3877	0.00793	0.01588	0.00867	0.00598	0.51144	0.29934	0.358346
Q9CAL7	AT1G70470	Q9CAL7	At1g70470	?UNKNOWN+ER+mitochondrion+pm	UNKNOWN	UNKNOWN	UNKNOWN	UNKNOWN	0.72711	0.72711	0.26466	0.71429	0.22116	0.15515	0.00955	0.0072	0.00465	0.04318	0.00421	0.02557	0.15108	0.00851	0.32691	0.04283	0.37631	0.06601	0.35147
Q9C942	AT1G52760	CSE	Caffeoylshikimate esterase	PEROXISOME+ER+mitochondrion?	UNKNOWN	UNKNOWN	PEROXISOME	ER	0.00024	0.36745	0.00024	1	0.27472	0.10199	0.003	0.00606	0.00902	0.00215	0.00628	0.46944	0.09124	0.01711	0.01252	0.00648	0.37671	0.17273	0.311641
A0A1I9LSS8	AT3G11040	ENGASE85B	mannosyl-glycoprotein endo-beta-N-acetylglucosaminidase	ER+peroxisome?	UNKNOWN	UNKNOWN	ER	PEROXISOME	0	0.01642	0	1	0.60323	0.06088	0.00306	0.06184	0.01384	0.02084	0.00366	0.10027	0.05962	0.01298	0.03789	0.0219	0.66411	0.54235	0.30393
Q949S7	AT5G15910	Q949S7	NAD(P)-binding Rossmann-fold superfamily protein	MITOCHONDRION+er?	MITOCHONDRION	UNKNOWN	MITOCHONDRION	UNKNOWN	0	0	0	1	0.11367	0.80056	0.00264	0.00217	0.00671	0.00456	0.00157	0.00809	0.04217	0.01068	0.00334	0.00384	0.91423	0.68689	0.286255
O65572	AT3G63520	CCD1	Carotenoid 9,10(9',10')-cleavage dioxygenase 1	PM+ER	UNKNOWN	UNKNOWN	PM	ER	0	0.18767	0	1	0.25641	0.0842	0.00752	0.00358	0.00711	0.00508	0.00455	0.05911	0.55377	0.00597	0.00408	0.00861	0.34061	0.17221	0.281954
Q9ZQH0	AT2G27490	COAE	Dephospho-CoA kinase	PEROXISOME+er?+mitochondrion?	UNKNOWN	PEROXISOME	PEROXISOME	ER	0.00057	0.04318	0.00057	1	0.14235	0.10627	0.0019	0.00572	0.01105	0.00509	0.00278	0.62986	0.03194	0.0496	0.00321	0.01022	0.24862	0.03608	0.23965
Q9SZB3	AT4G33360	FLDH	NAD(P)-binding Rossmann-fold superfamily protein	ER	UNKNOWN	ER	ER	UNKNOWN	2e-05	2e-05	0	0.5	0.78722	0.053	0.00511	0.00387	0.00222	0.01898	0.00299	0.00723	0.07758	0.00408	0.00981	0.02789	0.84022	0.73422	0.223314
A0A1P8ATK3	AT1G02270	A0A1P8ATK3	Calcium-binding endonuclease/exonuclease/phosphatase family	ER	UNKNOWN	UNKNOWN	ER	UNKNOWN	0	0	0	0.61905	0.84854	0.06373	0.00529	0.00127	0.0088	0.0455	0.00214	0.00324	0.00266	0.00814	0.00845	0.00224	0.91227	0.78481	0.196311

## Sheet: 8. ALL LOPIT PRED.
protein_id	alt_ids	gene_name	description	prediction	train_organelle	suborganelle	pred_class1	pred_class2	p_val	p_val_single	p_val_dual	completeness	CHLOROPLAST	CYTOSOL	ER	EXTRACELLULAR	GOLGI	MITOCHONDRION	NUCLEUS	PEROXISOME	PM	TGN	UNKNOWN	VACUOLE
F4HQH8	AT1G01080	F4HQH8	RNA-binding	CHLOROPLAST	CHLOROPLAST	PLASTID STROMA	CHLOROPLAST	UNKNOWN	0	0	0	1	0.98245	0.001	0.0009	0.00178	0.00063	0.0009	0.00582	0.00294	0.00079	0.00054	0.00153	0.00072
O24457	AT1G01090	PDH-E1 ALPHA	Pyruvate dehydrogenase E1 component subunit alpha-3, chloroplastic	CHLOROPLAST	CHLOROPLAST	UNKNOWN	CHLOROPLAST	UNKNOWN	0	0	0	1	0.98301	0.00085	0.00094	0.00144	0.00052	0.00194	0.00461	0.00316	0.00073	0.00049	0.00139	0.00093
Q8LCW9	AT1G01100	RPP1A	Large ribosomal subunit protein P1w	?CYTOSOL+NUCLEUS+PM+vacuole?	UNKNOWN	RIBOSOMAL	UNKNOWN	UNKNOWN	0.63324	0.63324	0.139	1	0.00179	0.38184	0.00556	0.02609	0.0042	0.00453	0.22385	0.01328	0.21171	0.00187	0.0105	0.11477
Q2HIQ2	AT1G01170	Q2HIQ2	At1g01170	MITOCHONDRION	MITOCHONDRION	UNKNOWN	MITOCHONDRION	UNKNOWN	0	0	0	1	0.00444	0.00074	0.00164	0.00271	0.00215	0.98	0.00231	0.00205	0.00103	0.00106	0.00098	0.00089
A0A178W6Y3	AT1G01220	FKGP	L-fucokinase/GDP-L-fucose pyrophosphorylase	CYTOSOL+PEROXISOME	UNKNOWN	UNKNOWN	CYTOSOL	PEROXISOME	0	0.19153	0	0.75	0.00311	0.61392	0.0014	0.00539	0.00129	0.01259	0.03255	0.30262	0.00464	0.00391	0.00549	0.01308
Q39056	AT1G01290	CNX3	Cyclic pyranopterin monophosphate synthase, mitochondrial	MITOCHONDRION	UNKNOWN	UNKNOWN	MITOCHONDRION	UNKNOWN	0	0	0	1	0.00705	0.00108	0.00187	0.00295	0.00239	0.9552	0.00497	0.01925	0.00127	0.00123	0.00175	0.00099
Q9LNJ3	AT1G01300	APF2	Aspartyl protease family protein 2	EXTRACELLULAR	UNKNOWN	EXTRACELLULAR	EXTRACELLULAR	UNKNOWN	0	0	0	0.88095	0.00274	0.01689	0.01447	0.91726	0.00668	0.00527	0.00253	0.0041	0.00726	0.00725	0.00713	0.00844
Q8GX84	AT1G01350	Q8GX84	Zinc finger CCCH domain-containing protein 1	NUCLEUS	NUCLEUS	NUCLEUS	NUCLEUS	UNKNOWN	0	0	0	0.88095	0.00192	0.00082	0.00187	0.00113	0.00139	0.00128	0.98344	0.00212	0.00137	0.00129	0.00224	0.00113
Q8RVQ9	AT1G01370	CENH3	Histone H3-like centromeric protein CENH3	NUCLEUS+UNKNOWN	UNKNOWN	NUCLEUS	NUCLEUS	UNKNOWN	0	0.36125	0	0.72619	0.0054	0.0026	0.01299	0.00414	0.01223	0.00509	0.55881	0.01965	0.00595	0.006	0.36475	0.00239
Q6NQ63	AT1G01440	Q6NQ63	At1g01440	PM	UNKNOWN	UNKNOWN	PM	UNKNOWN	0	0	0	0.69048	0.00278	0.07359	0.0044	0.02821	0.00421	0.00266	0.04358	0.0065	0.75566	0.00339	0.06399	0.01103
O03983	AT1G01470	LEA14	Probable desiccation-related protein LEA14	?CYTOSOL+EXTRACELLULAR+PM+er	UNKNOWN	UNKNOWN	UNKNOWN	UNKNOWN	0.71244	0.71244	0.33176	0.95238	0.00623	0.28389	0.18256	0.23211	0.01773	0.00971	0.00475	0.00569	0.22341	0.01337	0.00455	0.016
A0A1P8AS52	AT1G01490	A0A1P8AS52	Heavy metal transport/detoxification superfamily protein	PM+GOLGI+er?	UNKNOWN	UNKNOWN	PM	GOLGI	0.0005	0.52559	0.0005	0.61905	0.00903	0.00489	0.145	0.00863	0.33363	0.00672	0.01067	0.00302	0.43899	0.01738	0.01407	0.00797
O23702	AT1G01510	AN	C-terminal binding protein AN	CYTOSOL+PM	UNKNOWN	UNKNOWN	CYTOSOL	PM	0	0.40409	0	1	0.00156	0.53189	0.00423	0.0367	0.00226	0.00282	0.00389	0.01855	0.31915	0.00406	0.01013	0.06476
Q3EDL4	AT1G01540	Q3EDL4	Probable serine/threonine-protein kinase At1g01540	PM+er	UNKNOWN	PM	PM	ER	1e-05	0.02952	1e-05	0.88095	0.01287	0.00251	0.15521	0.00845	0.01919	0.00405	0.00395	0.02734	0.63555	0.00373	0.0276	0.09955
Q9LMM4	AT1G01570	Q9LMM4	F22L4.11 protein	GOLGI+extracellular+mitochondrion?	UNKNOWN	UNKNOWN	GOLGI	EXTRACELLULAR	9e-05	0.16034	9e-05	0.7619	0.00392	0.00516	0.00586	0.182	0.59938	0.14257	0.00427	0.03578	0.00163	0.00391	0.01397	0.00155
Q08733	AT1G01620	PIP1-3	Aquaporin PIP1-3	PM	UNKNOWN	UNKNOWN	PM	UNKNOWN	0	0	0	1	0.00169	0.00133	0.00697	0.00274	0.00322	0.00252	0.00197	0.00153	0.96558	0.00377	0.00123	0.00745
Q9LQ96	AT1G01630	Q9LQ96	Polyphosphoinositide binding protein, putative	?EXTRACELLULAR+PM+cytosol+er?	UNKNOWN	UNKNOWN	UNKNOWN	UNKNOWN	0.63349	0.63349	0.02431	0.88095	0.00507	0.16708	0.10884	0.32202	0.00743	0.00758	0.00451	0.01236	0.28032	0.00704	0.00773	0.07004
F4HU51	AT1G01710	ACH2	Acyl-CoA hydrolase 2	PEROXISOME	PEROXISOME	PEROXISOME	PEROXISOME	UNKNOWN	0	0	0	1	0.00222	0.00453	0.00214	0.00817	0.00155	0.00178	0.02882	0.93837	0.00177	0.00245	0.00636	0.00183
Q9LQ84	AT1G01725	T1N6.13	Adenylosuccinate synthetase	MITOCHONDRION	UNKNOWN	UNKNOWN	MITOCHONDRION	UNKNOWN	0	0	0	0.86905	0.0043	0.00096	0.00187	0.00226	0.00142	0.97932	0.00226	0.00155	0.00163	0.00164	0.00115	0.00163
Q9ZTZ7	AT1G01790	KEA1	K(+) efflux antiporter 1, chloroplastic	CHLOROPLAST	UNKNOWN	PLASTID MEMBRANE	CHLOROPLAST	UNKNOWN	0	0	0	0.86905	0.97507	0.00126	0.00252	0.00212	0.00263	0.00095	0.00211	0.00156	0.00092	0.00091	0.00918	0.00076
Q94K30	AT1G01800	Q94K30	AT1G01800 protein	CYTOSOL	UNKNOWN	UNKNOWN	CYTOSOL	UNKNOWN	0	0	0	1	0.0011	0.95309	0.00247	0.00133	0.00105	0.00196	0.0025	0.00335	0.01519	0.0024	0.00743	0.00812
Q9LQ73	AT1G01820	PEX11C	Peroxisomal membrane protein 11C	PEROXISOME	UNKNOWN	PEROXISOME	PEROXISOME	UNKNOWN	0	0	0	1	0.00171	0.00512	0.01542	0.00678	0.01048	0.00461	0.004	0.92844	0.00407	0.00767	0.0052	0.0065
Q949M9	AT1G01910	GET3A	ATPase GET3A	PM+CYTOSOL	UNKNOWN	UNKNOWN	PM	CYTOSOL	0	0.4196	0	1	0.00243	0.37319	0.03303	0.02374	0.00893	0.00595	0.00368	0.00329	0.50982	0.00537	0.00577	0.02481
Q9LPC8	AT1G01930	Q9LPC8	F22M8.6 protein	CYTOSOL+unknown?+nucleus?	UNKNOWN	UNKNOWN	CYTOSOL	UNKNOWN	0	0.02441	0	0.88095	0.00251	0.68176	0.00124	0.00864	0.00214	0.00562	0.10275	0.03411	0.00646	0.00276	0.1421	0.00991
Q9LPC7	AT1G01940	CYP18-1	Peptidyl-prolyl cis-trans isomerase CYP18-1	NUCLEUS	UNKNOWN	UNKNOWN	NUCLEUS	UNKNOWN	0	0	0	1	0.00177	0.00614	0.0132	0.01254	0.0024	0.00179	0.93523	0.00255	0.01194	0.00587	0.0043	0.00228
A0A1P8AMI8	AT1G01950	ARK2	Kinesin-like protein	?NUCLEUS+PM+unknown?	UNKNOWN	UNKNOWN	UNKNOWN	UNKNOWN	0.508	0.508	0.0532	0.75	0.00749	0.00768	0.01001	0.00579	0.00198	0.00288	0.43222	0.00882	0.36218	0.00573	0.14373	0.01149
Q9LPC5	AT1G01960	BIG3	Brefeldin A-inhibited guanine nucleotide-exchange protein 3	CYTOSOL	UNKNOWN	UNKNOWN	CYTOSOL	UNKNOWN	0	0	0	1	0.00165	0.87886	0.00177	0.06165	0.0021	0.00241	0.0135	0.00634	0.01299	0.00508	0.00462	0.00902
Q9LPC1	AT1G02000	GAE2	UDP-glucuronate 4-epimerase 2	GOLGI	UNKNOWN	UNKNOWN	GOLGI	UNKNOWN	0	0	0	0.7381	0.00167	0.00236	0.01537	0.00497	0.95021	0.00188	0.00457	0.001	0.00237	0.0044	0.00833	0.00285
O23673	AT1G02020	O23673	Nitroreductase family protein	MITOCHONDRION	UNKNOWN	UNKNOWN	MITOCHONDRION	UNKNOWN	0	0	0	0.64286	0.0594	0.01537	0.00273	0.04517	0.00452	0.81211	0.00833	0.00648	0.0026	0.00231	0.0401	0.00088
F4HVV7	AT1G02080	NOT1	Transcription regulator	CYTOSOL	UNKNOWN	UNKNOWN	CYTOSOL	UNKNOWN	0	0	0	1	0.00187	0.91889	0.00073	0.00374	0.00081	0.00248	0.02307	0.02397	0.00433	0.0014	0.00661	0.0121
Q94JU3	AT1G02090	CSN7	COP9 signalosome complex subunit 7	CYTOSOL+NUCLEUS	UNKNOWN	UNKNOWN	CYTOSOL	NUCLEUS	0	0.49263	0	1	0.00201	0.48941	0.00142	0.00449	0.00201	0.00445	0.47024	0.00497	0.00528	0.00255	0.00581	0.00736
Q8VY08	AT1G02100	LCMT1	Leucine carboxyl methyltransferase 1 homolog	CYTOSOL+unknown?	UNKNOWN	UNKNOWN	CYTOSOL	UNKNOWN	0.00052	0.00052	0	0.80952	0.07029	0.70307	0.00272	0.0031	0.00219	0.00469	0.00337	0.00249	0.01017	0.00251	0.14296	0.05244
Q56W45	AT1G02110	Q56W45	BZIP domain class transcription factor	PM+unknown?	UNKNOWN	UNKNOWN	PM	UNKNOWN	3e-05	3e-05	0	1	0.00449	0.00961	0.00911	0.00764	0.00935	0.00286	0.00725	0.0046	0.76248	0.00554	0.14788	0.02919
F4HVW5	AT1G02120	VAD1	Protein VASCULAR ASSOCIATED DEATH 1, chloroplastic	PM+ER	UNKNOWN	ER	PM	ER	0	0.41615	0	1	0.00596	0.0143	0.35219	0.02227	0.07131	0.00626	0.00626	0.00336	0.49818	0.0056	0.00573	0.00858
P28188	AT1G02130	RABD2A	Ras-related protein RABD2a	PM+TGN	UNKNOWN	UNKNOWN	PM	TGN	0	0.01682	0	1	0.00177	0.02013	0.03216	0.03567	0.00679	0.00316	0.00425	0.00601	0.66728	0.21439	0.00341	0.00499
O23676	AT1G02140	MAGO	Protein mago nashi homolog	NUCLEUS	NUCLEUS	NUCLEUS	NUCLEUS	UNKNOWN	0	0	0	1	0.0016	0.0187	0.00113	0.0049	0.00143	0.00256	0.95894	0.00224	0.00216	0.00141	0.00253	0.0024
A8MR93	AT1G02145	ALG12	Dol-P-Man:Man(7)GlcNAc(2)-PP-Dol alpha-1,6-mannosyltransferase	ER	UNKNOWN	UNKNOWN	ER	UNKNOWN	0	0	0	1	0.00572	0.00211	0.79865	0.00514	0.09355	0.00363	0.00254	0.0016	0.05985	0.01693	0.00344	0.00683
Q8LPS6	AT1G02150	Q8LPS6	Pentatricopeptide repeat-containing protein At1g02150	CHLOROPLAST	CHLOROPLAST	UNKNOWN	CHLOROPLAST	UNKNOWN	0	0	0	1	0.95983	0.00086	0.00108	0.00185	0.0008	0.00142	0.02739	0.00324	0.00087	0.00047	0.00145	0.00073
Q7XJE6	AT1G02170	AMC1	Metacaspase-1	?CYTOSOL+NUCLEUS+UNKNOWN	UNKNOWN	UNKNOWN	UNKNOWN	UNKNOWN	0.46994	0.46994	0.10405	1	0.00365	0.4584	0.00373	0.04259	0.00434	0.00349	0.20664	0.01661	0.04869	0.00369	0.20139	0.00678
A0A1P8ATK3	AT1G02270	A0A1P8ATK3	Calcium-binding endonuclease/exonuclease/phosphatase family	ER	UNKNOWN	UNKNOWN	ER	UNKNOWN	0	0	0	0.61905	0.00529	0.00127	0.84854	0.0088	0.0455	0.06373	0.00214	0.00324	0.00266	0.00814	0.00845	0.00224
O23680	AT1G02280	TOC33	Translocase of chloroplast 33, chloroplastic	CHLOROPLAST+peroxisome?	UNKNOWN	PLASTID MEMBRANE	CHLOROPLAST	UNKNOWN	1e-05	1e-05	0	1	0.76039	0.00235	0.01231	0.04774	0.02961	0.00142	0.01345	0.11518	0.00275	0.00315	0.01064	0.001
F4HVZ1	AT1G02300	CATHB1	Cathepsin B-like protease 1	?EXTRACELLULAR+UNKNOWN+ER	UNKNOWN	UNKNOWN	UNKNOWN	UNKNOWN	0.57066	0.57066	0.16125	0.75	0.00773	0.01578	0.22239	0.38079	0.01935	0.00987	0.00717	0.014	0.0148	0.01508	0.2836	0.00944
Q93VC9	AT1G02305	CATHB2	Cathepsin B-like protease 2	EXTRACELLULAR	UNKNOWN	UNKNOWN	EXTRACELLULAR	UNKNOWN	0	0	0	1	0.00395	0.03029	0.03088	0.86946	0.0058	0.00366	0.00401	0.00504	0.0229	0.00712	0.00429	0.0126
Q9FZ29	AT1G02310	MAN1	Mannan endo-1,4-beta-mannosidase 1	ER+EXTRACELLULAR+golgi?	UNKNOWN	UNKNOWN	ER	EXTRACELLULAR	1e-05	0.36565	1e-05	0.97619	0.00556	0.00138	0.47977	0.29081	0.1354	0.00475	0.00306	0.00355	0.00714	0.06357	0.00256	0.00245
Q9FZ27	AT1G02335	Q9FZ27	Germin-like protein subfamily 2 member 2	NUCLEUS	UNKNOWN	EXTRACELLULAR	NUCLEUS	UNKNOWN	0	0	0	0.86905	0.00205	0.00082	0.00176	0.00088	0.00186	0.00142	0.98267	0.00236	0.00124	0.00175	0.00181	0.00136
Q9FZ24	AT1G02370	Q9FZ24	Pentatricopeptide repeat-containing protein At1g02370, mitochondrial	MITOCHONDRION	MITOCHONDRION	UNKNOWN	MITOCHONDRION	UNKNOWN	0	0	0	1	0.00978	0.00188	0.00119	0.00311	0.00177	0.97127	0.00337	0.00345	0.001	0.00076	0.00148	0.00094
Q8GWR0	AT1G02410	COX11	Cytochrome c oxidase assembly protein COX11, mitochondrial	MITOCHONDRION	UNKNOWN	UNKNOWN	MITOCHONDRION	UNKNOWN	0	0	0	0.79762	0.00335	0.00154	0.00251	0.00138	0.00139	0.97287	0.00191	0.0036	0.00324	0.00127	0.00353	0.0034
Q94K52	AT1G02475	Q94K52	Polyketide cyclase/dehydrase and lipid transport superfamily protein	CHLOROPLAST	UNKNOWN	UNKNOWN	CHLOROPLAST	UNKNOWN	0	0	0	1	0.98509	0.00088	0.00151	0.00087	0.00074	0.00129	0.00165	0.00177	0.00115	0.00097	0.0023	0.00177
P23686	AT1G02500	SAM1	S-adenosylmethionine synthase 1	NUCLEUS+PM	UNKNOWN	UNKNOWN	NUCLEUS	PM	0	0.04946	0	1	0.00413	0.01432	0.00258	0.00207	0.00249	0.00477	0.63183	0.00582	0.2288	0.00284	0.0059	0.09445
Q9FWX6	AT1G02510	TPK4	Two-pore potassium channel 4	NUCLEUS	UNKNOWN	PM	NUCLEUS	UNKNOWN	0	0	0	0.59524	0.00147	0.00115	0.00144	0.00128	0.00183	0.00143	0.98349	0.00137	0.00125	0.0012	0.00244	0.00166
Q9FWX7	AT1G02520	ABCB11	ABC transporter B family member 11	PM	PM	PM	PM	UNKNOWN	0	0	0	1	0.00246	0.0014	0.02252	0.00909	0.00342	0.00157	0.00382	0.00276	0.94195	0.0048	0.00311	0.0031
Q9FWX8	AT1G02530	ABCB12	ABC transporter B family member 12	EXTRACELLULAR+CYTOSOL	UNKNOWN	UNKNOWN	EXTRACELLULAR	CYTOSOL	0	0.47173	0	0.71429	0.00377	0.33135	0.00398	0.49387	0.00499	0.01129	0.05164	0.00834	0.01208	0.00715	0.06251	0.00902
Q9S834	AT1G02560	CLPP5	ATP-dependent Clp protease proteolytic subunit 5, chloroplastic	CHLOROPLAST	UNKNOWN	PLASTID STROMA	CHLOROPLAST	UNKNOWN	0	0	0	1	0.93018	0.00125	0.0032	0.00159	0.00079	0.00204	0.00228	0.0497	0.0028	0.00143	0.00284	0.0019
Q94KD8	AT1G02640	BXL2	Probable beta-D-xylosidase 2	NUCLEUS	UNKNOWN	UNKNOWN	NUCLEUS	UNKNOWN	0	0	0	0.7619	0.00172	0.00094	0.0012	0.00111	0.00167	0.002	0.98231	0.00183	0.00088	0.00106	0.00413	0.00115
Q9FWY7	AT1G02690	IMPA6	Importin subunit alpha-6	NUCLEUS+CYTOSOL	UNKNOWN	UNKNOWN	NUCLEUS	CYTOSOL	0	0.47067	0	0.61905	0.00172	0.44371	0.00125	0.00196	0.00171	0.00417	0.51219	0.00414	0.00555	0.00192	0.0058	0.01588
Q9SRW9	AT1G02730	CSLD5	Cellulose synthase-like protein D5	ER+peroxisome?	UNKNOWN	UNKNOWN	ER	UNKNOWN	0.00018	0.00018	0	0.88095	0.00906	0.00548	0.70519	0.02708	0.01035	0.00587	0.00633	0.14224	0.00851	0.00761	0.06266	0.00963
Q9SRX2	AT1G02780	RPL19A	Large ribosomal subunit protein eL19x	CYTOSOL+PM	UNKNOWN	RIBOSOMAL	CYTOSOL	PM	0	0.51745	0	1	0.00278	0.41407	0.00377	0.04049	0.00305	0.00435	0.05851	0.00532	0.41103	0.00202	0.02705	0.02755
Q9SRX5	AT1G02816	F22D16.19	F22D16.19 protein	EXTRACELLULAR	UNKNOWN	UNKNOWN	EXTRACELLULAR	UNKNOWN	0	0	0	0.61905	0.00564	0.08414	0.01613	0.80942	0.0041	0.00534	0.0048	0.0065	0.02712	0.00669	0.0036	0.02652
Q9SRX7	AT1G02830	RPL22A	Large ribosomal subunit protein eL22x	CYTOSOL+unknown?	UNKNOWN	RIBOSOMAL	CYTOSOL	UNKNOWN	0	0.05058	0	0.7619	0.00333	0.66369	0.00212	0.07953	0.002	0.00645	0.02144	0.04257	0.01258	0.00381	0.13583	0.02665
O22315	AT1G02840	SR34	Serine/arginine-rich-splicing factor SR34	NUCLEUS	NUCLEUS	NUCLEUS	NUCLEUS	UNKNOWN	0	0	0	1	0.00197	0.00311	0.00097	0.0045	0.00129	0.00213	0.97921	0.00176	0.0013	0.00075	0.00198	0.00102
Q8RWK5	AT1G02870	Q8RWK5	Nucleolar protein 16	NUCLEUS	UNKNOWN	UNKNOWN	NUCLEUS	UNKNOWN	0	0	0	0.83333	0.00507	0.00177	0.00126	0.02309	0.00203	0.00434	0.95292	0.00342	0.00194	0.00105	0.00221	0.00091
F4HZ82	AT1G02890	F4HZ82	AAA-type ATPase family protein	NUCLEUS	UNKNOWN	UNKNOWN	NUCLEUS	UNKNOWN	0	0	0	0.86905	0.00134	0.00193	0.0008	0.00083	0.00067	0.00154	0.98348	0.00274	0.00125	0.00073	0.0023	0.00239
Q9SRY4	AT1G02910	LPA1	Protein LOW PSII ACCUMULATION 1, chloroplastic	CHLOROPLAST	CHLOROPLAST	PLASTID MEMBRANE	CHLOROPLAST	UNKNOWN	0	0	0	1	0.98139	0.00035	0.00271	0.00122	0.00106	0.002	0.00182	0.00521	0.001	0.00076	0.00167	0.00081
P42760	AT1G02930	GSTF6	Glutathione S-transferase F6	?CYTOSOL+VACUOLE+PM	UNKNOWN	UNKNOWN	UNKNOWN	UNKNOWN	0.64209	0.64209	0.04032	1	0.00111	0.37094	0.003	0.0068	0.00249	0.00358	0.00328	0.00255	0.2638	0.00366	0.00323	0.33555
Q9SRZ0	AT1G02980	CUL2	Cullin-2	NUCLEUS+CYTOSOL	UNKNOWN	UNKNOWN	NUCLEUS	CYTOSOL	0	0.481	0	0.84524	0.00263	0.43308	0.00139	0.00644	0.00237	0.00507	0.4758	0.00431	0.00513	0.00191	0.04586	0.01601
Q8RY16	AT1G03000	PEX6	Peroxisomal ATPase PEX6	NUCLEUS+CYTOSOL	UNKNOWN	UNKNOWN	NUCLEUS	CYTOSOL	0	0.49763	0	0.86905	0.00278	0.39981	0.0047	0.04761	0.00329	0.00418	0.43439	0.00559	0.05958	0.00788	0.02321	0.00698
Q500U9	AT1G03030	Q500U9	At1g03030	CHLOROPLAST	CHLOROPLAST	PLASTID STROMA	CHLOROPLAST	UNKNOWN	0	0	0	0.88095	0.98755	0.00057	0.00126	0.00105	0.00099	0.00162	0.00182	0.00148	0.00079	0.00064	0.00125	0.00097
A0A1P8AT16	AT1G03060	SPI	BEACH-DOMAIN HOMOLOG A1	CYTOSOL	UNKNOWN	UNKNOWN	CYTOSOL	UNKNOWN	0	0	0	1	0.00167	0.82529	0.00131	0.01112	0.00177	0.00447	0.02054	0.00624	0.00538	0.00165	0.08309	0.03747
F4HZB5	AT1G03080	NET1D	Protein NETWORKED 1D	?PM+UNKNOWN+CYTOSOL	UNKNOWN	UNKNOWN	UNKNOWN	UNKNOWN	0.55771	0.55771	0.05002	1	0.00507	0.20888	0.01431	0.07342	0.00184	0.01392	0.00471	0.0263	0.39806	0.00645	0.21781	0.02923
Q42523	AT1G03090	MCCA	Methylcrotonoyl-CoA carboxylase subunit alpha, mitochondrial	MITOCHONDRION	MITOCHONDRION	UNKNOWN	MITOCHONDRION	UNKNOWN	0	0	0	1	0.00285	0.00259	0.00109	0.00172	0.00109	0.97954	0.00255	0.00279	0.00134	0.00087	0.00203	0.00153
Q9SA60	AT1G03100	Q9SA60	Pentatricopeptide repeat-containing protein At1g03100, mitochondrial	MITOCHONDRION	UNKNOWN	UNKNOWN	MITOCHONDRION	UNKNOWN	0	0	0	0.72619	0.00177	0.00563	0.04736	0.01981	0.00743	0.77896	0.00256	0.00471	0.01174	0.06458	0.05205	0.00341
Q93WD7	AT1G03110	TRM82	tRNA	CYTOSOL	UNKNOWN	UNKNOWN	CYTOSOL	UNKNOWN	0	0	0	1	0.00263	0.90436	0.00106	0.01656	0.00173	0.0455	0.00632	0.00423	0.00197	0.00153	0.0093	0.00482
Q9SA55	AT1G03140	PRP18A	Pre-mRNA-splicing factor 18	NUCLEUS	NUCLEUS	NUCLEUS	NUCLEUS	UNKNOWN	0	0	0	1	0.0015	0.00157	0.00116	0.00169	0.00137	0.00118	0.9843	0.00171	0.00118	0.0012	0.00185	0.00128
Q8LGI8	AT1G03150	NAA20	N-terminal acetyltransferase B complex catalytic subunit NAA20	CYTOSOL+NUCLEUS	UNKNOWN	UNKNOWN	CYTOSOL	NUCLEUS	0	0.01194	0	1	0.00164	0.72459	0.00118	0.00339	0.00231	0.0038	0.23633	0.00504	0.00606	0.00342	0.00438	0.00787
Q1KPV0	AT1G03160	FZL	Probable transmembrane GTPase FZO-like, chloroplastic	CHLOROPLAST	CHLOROPLAST	UNKNOWN	CHLOROPLAST	UNKNOWN	0	0	0	1	0.98666	0.00047	0.00238	0.00118	0.00143	0.00082	0.00112	0.00113	0.00121	0.00134	0.00124	0.00102
Q8W4M7	AT1G03190	XPD	General transcription and DNA repair factor IIH helicase subunit XPD	NUCLEUS	UNKNOWN	UNKNOWN	NUCLEUS	UNKNOWN	0	0	0	1	0.00192	0.00325	0.00363	0.01968	0.00372	0.00198	0.94792	0.00226	0.00283	0.00685	0.0044	0.00154
Q9ZVS4	AT1G03220	SAP2	Eukaryotic aspartyl protease family protein	EXTRACELLULAR	EXTRACELLULAR	EXTRACELLULAR	EXTRACELLULAR	UNKNOWN	0	0	0	1	0.00272	0.00249	0.02082	0.93156	0.01238	0.00322	0.00248	0.00267	0.00237	0.0166	0.00147	0.00122
Q9ZVS5	AT1G03230	SAP1	Eukaryotic aspartyl protease family protein	EXTRACELLULAR+er	UNKNOWN	UNKNOWN	EXTRACELLULAR	ER	0	0.00383	0	0.88095	0.00342	0.00436	0.16046	0.75037	0.00889	0.00417	0.00298	0.00493	0.00909	0.03718	0.00766	0.00648
Q6NMJ6	AT1G03260	Q6NMJ6	At1g03260	EXTRACELLULAR+ER+golgi?	UNKNOWN	UNKNOWN	EXTRACELLULAR	ER	0	0.36271	0	1	0.01429	0.00473	0.30381	0.48901	0.13384	0.01111	0.00267	0.00956	0.00364	0.007	0.0144	0.00592
Q93ZW3	AT1G03280	Q93ZW3	TFIIE-alpha 1	NUCLEUS	UNKNOWN	UNKNOWN	NUCLEUS	UNKNOWN	0	0	0	0.66667	0.00542	0.00215	0.00116	0.00138	0.00095	0.02909	0.93016	0.01346	0.0011	0.00074	0.0125	0.00188
Q8L735	AT1G03310	ISA2	Isoamylase 2, chloroplastic	CHLOROPLAST	CHLOROPLAST	UNKNOWN	CHLOROPLAST	UNKNOWN	0	0	0	1	0.97968	0.00071	0.00163	0.00333	0.00168	0.00073	0.00702	0.0011	0.00081	0.00087	0.00183	0.0006
Q1H595	AT1G03330	LSM2	Sm-like protein LSM2	NUCLEUS+CYTOSOL	UNKNOWN	UNKNOWN	NUCLEUS	CYTOSOL	0	0.45488	0	1	0.0021	0.42617	0.00196	0.01702	0.00262	0.00578	0.51508	0.00501	0.00745	0.00314	0.00544	0.00826
Q9ZVT6	AT1G03350	Q9ZVT6	BSD domain-containing protein	CYTOSOL+VACUOLE	UNKNOWN	UNKNOWN	CYTOSOL	VACUOLE	0	0.03548	0	0.97619	0.00567	0.6977	0.00129	0.00204	0.00113	0.00395	0.00516	0.00324	0.01537	0.00132	0.05528	0.20786
Q9ZVT7	AT1G03360	RRP4	Exosome complex component RRP4 homolog	NUCLEUS	UNKNOWN	UNKNOWN	NUCLEUS	UNKNOWN	0	0	0	1	0.00116	0.02079	0.00109	0.00146	0.00105	0.00166	0.95905	0.00217	0.00298	0.00138	0.00225	0.00497
Q9ZVT9	AT1G03370	Q9ZVT9	C2 and GRAM domain-containing protein At1g03370	ER	UNKNOWN	UNKNOWN	ER	UNKNOWN	0	0	0	1	0.00385	0.00289	0.93427	0.00312	0.00738	0.0022	0.00459	0.0057	0.00982	0.00313	0.01757	0.00549
Q8GUL1	AT1G03380	ATG18G	Autophagy-related protein 18g	UNKNOWN+MITOCHONDRION	UNKNOWN	UNKNOWN	UNKNOWN	MITOCHONDRION	0	0.12679	0	0.75	0.00546	0.07695	0.00381	0.00879	0.00302	0.20022	0.02769	0.009	0.00612	0.00265	0.64197	0.01431
Q8L9T7	AT1G03430	AHP5	Histidine-containing phosphotransfer protein 5	CYTOSOL	UNKNOWN	UNKNOWN	CYTOSOL	UNKNOWN	0	0	0	1	0.00213	0.91558	0.01456	0.01527	0.00834	0.00226	0.00377	0.00167	0.0106	0.00591	0.01579	0.00411
Q9LR75	AT1G03475	CPX1	Coproporphyrinogen-III oxidase 1, chloroplastic	CHLOROPLAST	CHLOROPLAST	PLASTID STROMA	CHLOROPLAST	UNKNOWN	0	0	0	1	0.98117	0.00343	0.0014	0.0018	0.00063	0.00076	0.00145	0.00241	0.00141	0.00055	0.00325	0.00174
Q9LR70	AT1G03530	NAF1	H/ACA ribonucleoprotein complex non-core subunit NAF1	NUCLEUS+vacuole	UNKNOWN	UNKNOWN	NUCLEUS	VACUOLE	0	0.00132	0	0.70238	0.00328	0.01089	0.00258	0.00121	0.00199	0.00799	0.67143	0.02021	0.03198	0.00223	0.08639	0.15983
Q9LR65	AT1G03590	PPC6-6	Probable protein phosphatase 2C 1	PM+cytosol?	UNKNOWN	UNKNOWN	PM	UNKNOWN	0.00016	0.00016	0	1	0.00193	0.13929	0.00796	0.06318	0.00298	0.00307	0.00548	0.00535	0.74036	0.00525	0.00696	0.01819
Q9LR64	AT1G03600	PSB27-1	Photosystem II repair protein PSB27-H1, chloroplastic	CHLOROPLAST	UNKNOWN	PLASTID MEMBRANE	CHLOROPLAST	UNKNOWN	0	0	0	1	0.98316	0.00059	0.00103	0.00113	0.00075	0.00173	0.00532	0.00291	0.00073	0.00067	0.00107	0.0009
O48741	AT1G03630	PORC	Protochlorophyllide reductase C, chloroplastic	CHLOROPLAST	CHLOROPLAST	PLASTID MEMBRANE	CHLOROPLAST	UNKNOWN	0	0	0	1	0.98606	0.00073	0.00209	0.00169	0.0011	0.00052	0.00143	0.00127	0.00125	0.00107	0.00189	0.00091
O48737	AT1G03680	O48737	Thioredoxin M1, chloroplastic	CHLOROPLAST	UNKNOWN	PLASTID MEMBRANE	CHLOROPLAST	UNKNOWN	0	0	0	1	0.96885	0.00212	0.0015	0.00093	0.00046	0.00243	0.00145	0.01286	0.00192	0.00072	0.00275	0.00401
Q9LR53	AT1G03740	Q9LR53	F21B7.34	PM	UNKNOWN	UNKNOWN	PM	UNKNOWN	0	0	0	0.7381	0.0049	0.0051	0.00428	0.00451	0.00486	0.00266	0.01593	0.00232	0.93147	0.00744	0.01336	0.00318
Q8GWP1	AT1G03760	Q8GWP1	Prefoldin chaperone subunit family protein	CYTOSOL+unknown+nucleus?	UNKNOWN	UNKNOWN	CYTOSOL	UNKNOWN	0	0.01387	0	0.86905	0.01774	0.66726	0.00151	0.00551	0.00171	0.005	0.10404	0.00816	0.00544	0.00188	0.16879	0.01296
F4I2H4	AT1G03770	RING1B	RING 1B	NUCLEUS	UNKNOWN	UNKNOWN	NUCLEUS	UNKNOWN	0	0	0	0.92857	0.00448	0.00102	0.00078	0.0028	0.00086	0.00597	0.96739	0.01007	0.00085	0.00053	0.00463	0.00062
Q9ZWA4	AT1G03820	F11M21.25	At1g03820	?ER+GOLGI+unknown	UNKNOWN	UNKNOWN	UNKNOWN	UNKNOWN	0.52993	0.52993	0.07001	0.85714	0.00356	0.04306	0.38942	0.04013	0.22257	0.01447	0.00319	0.00539	0.01675	0.01744	0.15587	0.08815
F4I2I5	AT1G03830	GBPL1	Guanylate-binding family protein	NUCLEUS	UNKNOWN	UNKNOWN	NUCLEUS	UNKNOWN	0	0	0	1	0.00196	0.00057	0.00144	0.00345	0.00352	0.00377	0.97817	0.00214	0.0009	0.00076	0.00259	0.00074
Q9ZNT7	AT1G03860	PHB2	Prohibitin-2, mitochondrial	MITOCHONDRION	UNKNOWN	MIM	MITOCHONDRION	UNKNOWN	0	0	0	0.9881	0.00201	0.00077	0.00274	0.00258	0.00459	0.97954	0.00134	0.00133	0.00118	0.00166	0.00146	0.00081
Q9ZWA8	AT1G03870	FLA9	Fasciclin-like arabinogalactan protein 9	PM	UNKNOWN	UNKNOWN	PM	UNKNOWN	0	0	0	0.7381	0.0022	0.00156	0.02168	0.00523	0.00401	0.00245	0.00331	0.00298	0.9261	0.02452	0.00287	0.0031
Q681Q7	AT1G03900	Q681Q7	Uncharacterized protein At1g03900	CYTOSOL+pm	UNKNOWN	UNKNOWN	CYTOSOL	UNKNOWN	7e-05	7e-05	0	1	0.00113	0.80067	0.00354	0.00665	0.00145	0.00272	0.00651	0.00277	0.15475	0.00469	0.00317	0.01195
F4I2J8	AT1G03910	CTN	Splicing factor Cactin	NUCLEUS	NUCLEUS	NUCLEUS	NUCLEUS	UNKNOWN	0	0	0	1	0.00262	0.00104	0.00104	0.00508	0.00209	0.00189	0.97971	0.00191	0.0012	0.00108	0.0016	0.00074
Q941D5	AT1G03950	VPS2.3	Vacuolar protein sorting-associated protein 2 homolog 3	CYTOSOL+NUCLEUS	UNKNOWN	UNKNOWN	CYTOSOL	NUCLEUS	0	0.0027	0	0.75	0.00135	0.75585	0.00159	0.00532	0.0021	0.00369	0.20101	0.00355	0.00728	0.00392	0.00393	0.01041
Q4VCM1	AT1G04010	PSAT	Phospholipid--sterol O-acyltransferase	ER	UNKNOWN	UNKNOWN	ER	UNKNOWN	0	0	0	1	0.00267	0.00313	0.92898	0.02321	0.01312	0.00205	0.00573	0.00171	0.00699	0.00519	0.00323	0.00399
Q9ZWC4	AT1G04040	Q9ZWC4	At1g04040/F21M11_2	PEROXISOME	UNKNOWN	UNKNOWN	PEROXISOME	UNKNOWN	0	0	0	1	0.01805	0.00224	0.00667	0.01099	0.08046	0.00706	0.01497	0.84301	0.00253	0.0062	0.00522	0.0026
Q93ZR3	AT1G04080	PRP39-1	Pre-mRNA-processing factor 39-1	NUCLEUS	UNKNOWN	UNKNOWN	NUCLEUS	UNKNOWN	0	0	0	1	0.00268	0.02262	0.00208	0.04682	0.00244	0.00547	0.90015	0.00461	0.00435	0.00217	0.004	0.0026
Q7GB25	AT1G04120	ABCC5	ABC transporter C family member 5	VACUOLE+peroxisome?	UNKNOWN	UNKNOWN	VACUOLE	UNKNOWN	1e-05	1e-05	0	1	0.00228	0.00486	0.00449	0.00592	0.00328	0.00678	0.0033	0.11449	0.01729	0.00239	0.01296	0.82196
F4I456	AT1G04130	TPR2	Tetratricopeptide repeat	NUCLEUS+CYTOSOL	UNKNOWN	UNKNOWN	NUCLEUS	CYTOSOL	0	0.42258	0	1	0.00203	0.41355	0.00133	0.00517	0.00192	0.00488	0.54232	0.00475	0.00537	0.00223	0.00993	0.00649
O64492	AT1G04150	MCTP10	Multiple C2 domain and transmembrane region protein 10	ER+peroxisome?	UNKNOWN	UNKNOWN	ER	UNKNOWN	4e-05	4e-05	0	0.91667	0.02341	0.00245	0.73768	0.0048	0.01354	0.00463	0.00567	0.10477	0.08409	0.00783	0.00628	0.00484
O64490	AT1G04170	EIF2	protein-synthesizing GTPase	CYTOSOL	UNKNOWN	UNKNOWN	CYTOSOL	UNKNOWN	0	0	0	1	0.00132	0.89237	0.0011	0.00593	0.00187	0.00316	0.06875	0.00331	0.00519	0.00335	0.00293	0.01072
Q8RXN1	AT1G04190	TPR3	Tetratricopeptide repeat	NUCLEUS+CYTOSOL	UNKNOWN	UNKNOWN	NUCLEUS	CYTOSOL	0	0.44508	0	1	0.00148	0.41838	0.0013	0.00222	0.00176	0.00362	0.53412	0.00377	0.00822	0.00228	0.00467	0.01819
Q8RWV1	AT1G04200	Q8RWV1	Dymeclin	NUCLEUS+CYTOSOL	UNKNOWN	UNKNOWN	NUCLEUS	CYTOSOL	0	0.48461	0	1	0.00163	0.45419	0.00157	0.00486	0.00223	0.0036	0.49846	0.00518	0.00989	0.00278	0.00971	0.0059
P93829	AT1G04260	PRA1D	PRA1 family protein D	TGN+cytosol	UNKNOWN	TGN	TGN	UNKNOWN	0.00094	0.00094	0	0.9881	0.00123	0.19485	0.00352	0.01704	0.00551	0.00324	0.00231	0.00446	0.00527	0.74507	0.00593	0.01158
Q08112	AT1G04270	RPS15A	Small ribosomal subunit protein uS19u	CYTOSOL	UNKNOWN	RIBOSOMAL	CYTOSOL	UNKNOWN	0	0	0	0.86905	0.00321	0.82975	0.00539	0.07792	0.00293	0.00257	0.00496	0.00843	0.02025	0.00282	0.00545	0.03633
A0A1P8APX5	AT1G04290	A0A1P8APX5	Thioesterase superfamily protein	PEROXISOME	UNKNOWN	UNKNOWN	PEROXISOME	UNKNOWN	0	0	0	0.7381	0.03995	0.00149	0.00329	0.00696	0.00436	0.004	0.08605	0.84176	0.00152	0.0035	0.00608	0.00103
O22690	AT1G04340	O22690	At1g04340/F19P19_23	ER	UNKNOWN	UNKNOWN	ER	UNKNOWN	0	0	0	1	0.00891	0.0029	0.78089	0.00835	0.01689	0.00543	0.08512	0.02505	0.00321	0.00485	0.05486	0.00354
P93819	AT1G04410	MDH1	Malate dehydrogenase 1, cytoplasmic	CYTOSOL	UNKNOWN	UNKNOWN	CYTOSOL	UNKNOWN	0	0	0	1	0.00086	0.93527	0.00313	0.00417	0.00164	0.00227	0.00192	0.00084	0.00442	0.00378	0.00513	0.03657
Q8VZ23	AT1G04420	Q8VZ23	NAD(P)-linked oxidoreductase superfamily protein	CHLOROPLAST	UNKNOWN	PLASTID STROMA	CHLOROPLAST	UNKNOWN	0	0	0	1	0.97493	0.0024	0.00262	0.00251	0.00093	0.00057	0.00173	0.00134	0.00341	0.00182	0.00356	0.00418
Q940J9	AT1G04430	Q940J9	Probable methyltransferase PMT8	GOLGI	GOLGI	GOLGI TRANS	GOLGI	UNKNOWN	0	0	0	1	0.00135	0.0006	0.00447	0.00318	0.9782	0.00163	0.00168	0.0015	0.00117	0.00279	0.00201	0.00141
Q5XF24	AT1G04440	CKL13	Casein kinase 1-like protein 13	?PM+NUCLEUS+unknown?	UNKNOWN	UNKNOWN	UNKNOWN	UNKNOWN	0.52671	0.52671	0.00879	0.9881	0.00317	0.04485	0.00487	0.01524	0.00333	0.00298	0.34308	0.00957	0.39743	0.00324	0.14113	0.03112
P49690	AT1G04480;AT2G33370;AT3G04400	RPL23A; RPL23B; RPL23C	Large ribosomal subunit protein uL14x/uL14z/uL14y	?VACUOLE+NUCLEUS+CYTOSOL	UNKNOWN	RIBOSOMAL	UNKNOWN	UNKNOWN	0.52652	0.52652	0.04946	1	0.00211	0.22767	0.00107	0.00211	0.00187	0.00521	0.27306	0.00666	0.0506	0.00104	0.00507	0.42353
F4I5P3	AT1G04510	MAC3A	Pre-mRNA-processing factor 19	NUCLEUS	NUCLEUS	NUCLEUS	NUCLEUS	UNKNOWN	0	0	0	1	0.00165	0.00117	0.00097	0.00102	0.0012	0.00158	0.98587	0.00211	0.00107	0.00106	0.00115	0.00114
Q8VZ31	AT1G04530	TPR4	Tetratricopeptide repeat	PM+CYTOSOL+unknown?	UNKNOWN	UNKNOWN	PM	CYTOSOL	2e-05	0.43721	2e-05	1	0.00329	0.33336	0.00248	0.01237	0.00276	0.00489	0.03753	0.01106	0.46736	0.0042	0.11027	0.01042
Q1G3F4	AT1G04555	Q1G3F4	Transmembrane protein	GOLGI	UNKNOWN	UNKNOWN	GOLGI	UNKNOWN	0	0	0	0.86905	0.00159	0.00055	0.0076	0.00349	0.96831	0.00204	0.0044	0.00217	0.00115	0.005	0.00249	0.00121
F4I5Q5	AT1G04590	F4I5Q5	PPR containing-like protein	MITOCHONDRION	MITOCHONDRION	UNKNOWN	MITOCHONDRION	UNKNOWN	0	0	0	0.83333	0.00164	0.00132	0.00168	0.00441	0.00306	0.96057	0.00741	0.01325	0.00126	0.00139	0.00305	0.00096
Q8GS60	AT1G04620	HCAR	7-hydroxymethyl chlorophyll a reductase, chloroplastic	CHLOROPLAST	CHLOROPLAST	UNKNOWN	CHLOROPLAST	UNKNOWN	0	0	0	0.86905	0.97524	0.00106	0.0029	0.00147	0.00162	0.00091	0.00167	0.00127	0.00141	0.00151	0.00972	0.0012
Q8RWA7	AT1G04630	MEE4	NADH dehydrogenase [ubiquinone] 1 alpha subcomplex subunit 13-A	MITOCHONDRION	MITOCHONDRION	MIM	MITOCHONDRION	UNKNOWN	0	0	0	1	0.00226	0.00073	0.0021	0.00335	0.00185	0.98024	0.00239	0.00205	0.00142	0.00166	0.00096	0.001
Q6AWV1	AT1G04635	EMB1687	Probable ribonuclease P/MRP protein subunit POP5	NUCLEUS	UNKNOWN	UNKNOWN	NUCLEUS	UNKNOWN	0	0	0	0.60714	0.00243	0.00631	0.01744	0.04504	0.00365	0.00401	0.84299	0.00498	0.02047	0.04522	0.00303	0.00442
Q9SXP7	AT1G04640	LIP2	Octanoyltransferase LIP2, mitochondrial	MITOCHONDRION	UNKNOWN	UNKNOWN	MITOCHONDRION	UNKNOWN	0	0	0	1	0.00108	0.00566	0.00175	0.00969	0.0018	0.96709	0.00275	0.0018	0.00165	0.00181	0.00384	0.00108
A0A1P8AVU0	AT1G04650	FLIP	Holliday junction resolvase	NUCLEUS+UNKNOWN	UNKNOWN	UNKNOWN	NUCLEUS	UNKNOWN	0	0.05063	0	0.54762	0.08302	0.00554	0.00285	0.0044	0.00264	0.00415	0.68382	0.00364	0.00246	0.00165	0.2041	0.00172
O23016	AT1G04690	KAB1	Probable voltage-gated potassium channel subunit beta	CYTOSOL	UNKNOWN	UNKNOWN	CYTOSOL	UNKNOWN	0	0	0	1	0.00092	0.9416	0.00144	0.00902	0.00159	0.00226	0.00997	0.00213	0.01028	0.00627	0.00163	0.01289
Q8LF48	AT1G04710	KAT1	3-ketoacyl-CoA thiolase 1, peroxisomal	PEROXISOME	UNKNOWN	UNKNOWN	PEROXISOME	UNKNOWN	0	0	0	1	0.00158	0.00256	0.00844	0.00349	0.00337	0.00223	0.00262	0.94489	0.00912	0.00775	0.00644	0.00751
A0A1P8ASP2	AT1G04730	CTF18	Chromosome transmission fidelity protein 18 homolog	NUCLEUS+MITOCHONDRION	UNKNOWN	UNKNOWN	NUCLEUS	MITOCHONDRION	0	0.47611	0	0.89286	0.00367	0.0046	0.00162	0.00803	0.00407	0.42547	0.48754	0.05228	0.00198	0.0014	0.00726	0.00209
Q9ZTW3	AT1G04750	VAMP721	Vesicle-associated membrane protein 721	PM	UNKNOWN	UNKNOWN	PM	UNKNOWN	0	0	0	0.9881	0.00192	0.00525	0.00829	0.02409	0.00188	0.0028	0.0036	0.0037	0.89073	0.03912	0.00194	0.01665
Q8GXW8	AT1G04780	Q8GXW8	Ankyrin repeat family protein	?PM+ER+extracellular?+vacuole?	UNKNOWN	PM	UNKNOWN	UNKNOWN	0.68338	0.68338	0.02872	1	0.00537	0.07574	0.27308	0.1468	0.01753	0.00682	0.0056	0.01443	0.28464	0.0061	0.04934	0.11455
Q9MAT0	AT1G04810	RPN2B	26S proteasome non-ATPase regulatory subunit 1 homolog B	CYTOSOL	UNKNOWN	UNKNOWN	CYTOSOL	UNKNOWN	0	0	0	1	0.00102	0.94158	0.00115	0.00783	0.00131	0.00176	0.01864	0.00222	0.00515	0.00205	0.00245	0.01483
Q0WV25	AT1G04820	TUBA4	Tubulin alpha-4 chain	PM+NUCLEUS	UNKNOWN	UNKNOWN	PM	NUCLEUS	0	0.50262	0	1	0.00493	0.01636	0.00252	0.00337	0.00216	0.00506	0.4209	0.00906	0.44659	0.00206	0.00445	0.08255
Q9MAT3	AT1G04850	Q9MAT3	F13M7.16 protein	CYTOSOL+NUCLEUS	UNKNOWN	UNKNOWN	CYTOSOL	NUCLEUS	0	0.09911	0	1	0.00166	0.66985	0.00152	0.00461	0.00221	0.00383	0.28778	0.00541	0.00696	0.00277	0.00551	0.0079
Q8W4N3	AT1G04860	UBP2	Ubiquitin carboxyl-terminal hydrolase 2	CYTOSOL+nucleus?	UNKNOWN	UNKNOWN	CYTOSOL	UNKNOWN	4e-05	4e-05	0	1	0.00118	0.75997	0.00083	0.00356	0.00124	0.00269	0.11213	0.00681	0.05504	0.00166	0.01328	0.04162
Q9MAT5	AT1G04870	PRMT10	Protein arginine N-methyltransferase PRMT10	CYTOSOL	UNKNOWN	UNKNOWN	CYTOSOL	UNKNOWN	0	0	0	1	0.00107	0.94101	0.00117	0.00124	0.00079	0.00665	0.00127	0.00268	0.00344	0.00128	0.00524	0.03416
Q94C90	AT1G04900	Q94C90	Protein arginine methyltransferase NDUFAF7	MITOCHONDRION	UNKNOWN	UNKNOWN	MITOCHONDRION	UNKNOWN	0	0	0	1	0.0018	0.00199	0.00115	0.00421	0.00168	0.97785	0.00416	0.00266	0.00105	0.00082	0.00195	0.00069
Q8W486	AT1G04910	OFUT1	O-fucosyltransferase 1	GOLGI	GOLGI	GOLGI TRANS	GOLGI	UNKNOWN	0	0	0	1	0.00151	0.00063	0.00335	0.00322	0.97846	0.00144	0.00277	0.00145	0.00117	0.00275	0.00213	0.00113
Q9MAU3	AT1G04950	TAF6	Transcription initiation factor TFIID subunit 6	NUCLEUS+EXTRACELLULAR	UNKNOWN	UNKNOWN	NUCLEUS	EXTRACELLULAR	0	0.23391	0	0.63095	0.00757	0.00157	0.01693	0.28172	0.04883	0.00803	0.61576	0.00481	0.00391	0.00419	0.00453	0.00213
Q9MAU5	AT1G04970	Q9MAU5	Putative BPI/LBP family protein At1g04970	EXTRACELLULAR	UNKNOWN	UNKNOWN	EXTRACELLULAR	UNKNOWN	0	0	0	0.5	0.00634	0.00805	0.00965	0.79667	0.00541	0.00519	0.09424	0.01699	0.00745	0.00452	0.04069	0.0048
Q9MAU6	AT1G04980	PDIL2-2	Protein disulfide-isomerase like 2-2	ER	ER	ER	ER	UNKNOWN	0	0	0	1	0.00293	0.00161	0.956	0.00434	0.00684	0.00245	0.00705	0.00618	0.00255	0.00382	0.00391	0.00232
Q84JL8	AT1G04985	Q84JL8	Triacylglycerol lipase-like protein	MITOCHONDRION	MITOCHONDRION	UNKNOWN	MITOCHONDRION	UNKNOWN	0	0	0	1	0.00664	0.00081	0.00151	0.00261	0.00188	0.97477	0.00295	0.00449	0.00112	0.0009	0.00125	0.00107
Q94AD9	AT1G04990	Q94AD9	Zinc finger CCCH domain-containing protein 3	UNKNOWN+VACUOLE	UNKNOWN	UNKNOWN	UNKNOWN	VACUOLE	0	0.06482	0	0.9881	0.00313	0.02127	0.00371	0.00365	0.00502	0.00422	0.0273	0.05283	0.02597	0.00535	0.59496	0.25259
Q06588	AT1G05010	ACO4	1-aminocyclopropane-1-carboxylate oxidase 4	CYTOSOL+vacuole?	UNKNOWN	UNKNOWN	CYTOSOL	UNKNOWN	1e-05	1e-05	0	0.52381	0.00263	0.76391	0.00181	0.00769	0.00192	0.02998	0.00465	0.0035	0.00255	0.00211	0.04323	0.13601
Q9ZVP0	AT1G05060	Q9ZVP0	At1g05060	MITOCHONDRION	UNKNOWN	UNKNOWN	MITOCHONDRION	UNKNOWN	0	0	0	0.60714	0.0099	0.00204	0.00154	0.00197	0.00189	0.96843	0.00409	0.00185	0.00147	0.00095	0.00392	0.00194
Q94AB8	AT1G05070	Q94AB8	At1g05070/T7A14_6	GOLGI	UNKNOWN	UNKNOWN	GOLGI	UNKNOWN	0	0	0	1	0.00142	0.00136	0.00278	0.00812	0.97459	0.00138	0.00203	0.00108	0.00119	0.00262	0.00226	0.00116
O23052	AT1G05150	O23052	Uncharacterized TPR repeat-containing protein At1g05150	PM	UNKNOWN	UNKNOWN	PM	UNKNOWN	0	0	0	1	0.00279	0.00117	0.02569	0.00404	0.00615	0.00289	0.00346	0.00282	0.93918	0.0063	0.00295	0.00257
P42744	AT1G05180	AXR1	NEDD8-activating enzyme E1 regulatory subunit AXR1	CYTOSOL	UNKNOWN	UNKNOWN	CYTOSOL	UNKNOWN	0	0	0	1	0.00229	0.93861	0.00165	0.02908	0.00361	0.00361	0.00412	0.0032	0.00323	0.00293	0.00418	0.00348
O23049	AT1G05190	RPL6	Large ribosomal subunit protein uL6c	CHLOROPLAST	CHLOROPLAST	PLASTID MEMBRANE	CHLOROPLAST	UNKNOWN	0	0	0	1	0.98396	0.00099	0.00096	0.00172	0.00061	0.0007	0.00501	0.00243	0.00085	0.00058	0.0014	0.00079
Q8LG56	AT1G05205	Q8LG56	At1g05205	MITOCHONDRION	UNKNOWN	UNKNOWN	MITOCHONDRION	UNKNOWN	0	0	0	1	0.00284	0.00088	0.00192	0.00216	0.00218	0.98184	0.00146	0.00172	0.0014	0.00129	0.00113	0.00118
Q8GXY6	AT1G05270	YUP8H12.12	At1g05270	MITOCHONDRION+PEROXISOME+er?	UNKNOWN	MOM	MITOCHONDRION	PEROXISOME	0.00051	0.55372	0.00051	1	0.00259	0.00555	0.10605	0.00884	0.04049	0.40539	0.00492	0.3877	0.00793	0.01588	0.00867	0.00598
F4I8Q1	AT1G05320	PICL	Myosin heavy chain, embryonic smooth protein	PM+extracellular?+cytosol?	UNKNOWN	ER	PM	EXTRACELLULAR	0	0.01903	0	0.86905	0.00439	0.12303	0.04121	0.13463	0.00653	0.00548	0.01422	0.00502	0.62745	0.00498	0.02844	0.00461
O23034	AT1G05350	O23034	Ubiquitin-like modifier-activating enzyme 5	VACUOLE	UNKNOWN	UNKNOWN	VACUOLE	UNKNOWN	0	0	0	1	0.00074	0.02247	0.00208	0.00198	0.00237	0.00117	0.00137	0.00126	0.01401	0.00196	0.00227	0.94833
Q8LC42	AT1G05430	Q8LC42	Uncharacterized protein At1g05430	MITOCHONDRION	UNKNOWN	UNKNOWN	MITOCHONDRION	UNKNOWN	0	0	0	1	0.00246	0.00081	0.00226	0.00185	0.002	0.98112	0.00155	0.00214	0.00181	0.0013	0.00131	0.00138
Q8GYD9	AT1G05460	SDE3	Probable RNA helicase SDE3	?CYTOSOL+MITOCHONDRION+peroxisome	UNKNOWN	UNKNOWN	UNKNOWN	UNKNOWN	0.36115	0.36115	0.12007	0.63095	0.00247	0.47964	0.00283	0.0076	0.00248	0.20532	0.0087	0.19171	0.0045	0.00515	0.0689	0.02073
Q8L706	AT1G05500	SYT5	Synaptotagmin-5	PM+ER	UNKNOWN	UNKNOWN	PM	ER	0	0.09096	0	1	0.00549	0.00245	0.27096	0.01282	0.0387	0.00443	0.00761	0.00417	0.63586	0.01048	0.00354	0.00348
Q8H0S3	AT1G05520	SEC23B	Protein transport protein SEC23 B	NUCLEUS+CYTOSOL	UNKNOWN	UNKNOWN	NUCLEUS	CYTOSOL	0	0.28398	0	1	0.00153	0.33113	0.00143	0.00207	0.00149	0.00365	0.58928	0.00536	0.02717	0.0018	0.00498	0.03011
Q9AUE0	AT1G05570	CALS1	Callose synthase 1	PM	PM	PM	PM	UNKNOWN	0	0	0	1	0.00594	0.00374	0.05362	0.01407	0.03255	0.00377	0.00631	0.00689	0.8572	0.00335	0.00949	0.00306
Q9SYK0	AT1G05590	HEXO2	Beta-hexosaminidase 2	UNKNOWN+EXTRACELLULAR	UNKNOWN	UNKNOWN	UNKNOWN	EXTRACELLULAR	0	0.49651	0	0.75	0.00478	0.02334	0.02526	0.42508	0.01683	0.00816	0.02429	0.00614	0.0112	0.00981	0.4401	0.00501
Q8LAC4	AT1G05620	URH2	Probable uridine nucleosidase 2	CYTOSOL	UNKNOWN	CYTOSOL	CYTOSOL	UNKNOWN	0	0	0	1	0.00242	0.86583	0.00174	0.00317	0.00193	0.08469	0.00269	0.00343	0.00242	0.00204	0.02284	0.0068
Q8GWP6	AT1G05720	Q8GWP6	Selenoprotein F	ER	UNKNOWN	GOLGI CIS	ER	UNKNOWN	0	0	0	1	0.00256	0.00122	0.94987	0.00432	0.01888	0.00221	0.00249	0.00157	0.00258	0.00986	0.00225	0.00216
Q5BQ23	AT1G05730	Q5BQ23	FAM136A-like protein	MITOCHONDRION	UNKNOWN	UNKNOWN	MITOCHONDRION	UNKNOWN	0	0	0	0.7619	0.00103	0.00176	0.01556	0.00404	0.00464	0.95271	0.0013	0.00138	0.00463	0.00726	0.00402	0.00167
Q9MA41	AT1G05850	CTL1	Chitinase-like protein 1	GOLGI+TGN	UNKNOWN	UNKNOWN	GOLGI	TGN	0	0.12381	0	1	0.0022	0.00144	0.07049	0.0078	0.61022	0.00368	0.0021	0.00267	0.00606	0.28763	0.00232	0.0034
Q8L829	AT1G05890	ARI5	Probable E3 ubiquitin-protein ligase ARI5	?CYTOSOL+NUCLEUS+vacuole?+pm?	UNKNOWN	UNKNOWN	UNKNOWN	UNKNOWN	0.58189	0.58189	0.11999	1	0.00213	0.40775	0.00135	0.00486	0.00184	0.00285	0.26211	0.05703	0.10183	0.00245	0.03178	0.12402
F4IAE9	AT1G05910	F4IAE9	ATPase family AAA domain-containing protein At1g05910	NUCLEUS	NUCLEUS	NUCLEUS	NUCLEUS	UNKNOWN	0	0	0	1	0.00221	0.00106	0.00118	0.00523	0.00232	0.00192	0.9792	0.00175	0.00119	0.00125	0.00185	0.00085
A0A1P8AU02	AT1G05940	CAT9	Cationic amino acid transporter 9	VACUOLE	UNKNOWN	UNKNOWN	VACUOLE	UNKNOWN	0	0	0	1	0.00302	0.0103	0.03912	0.04345	0.01216	0.00337	0.00269	0.00794	0.04648	0.0195	0.0218	0.79016
F4IAF6	AT1G05960	F4IAF6	ARM repeat superfamily protein	PM	UNKNOWN	UNKNOWN	PM	UNKNOWN	0	0	0	1	0.00187	0.00209	0.00284	0.00252	0.00209	0.00176	0.004	0.00203	0.96996	0.00307	0.00241	0.00538
Q9LNE6	AT1G06000	UGT89C1	Flavonol 7-O-rhamnosyltransferase	CYTOSOL	UNKNOWN	UNKNOWN	CYTOSOL	UNKNOWN	0	0	0	0.97619	0.0023	0.95307	0.00108	0.00337	0.00161	0.01801	0.00291	0.00192	0.00134	0.00135	0.00708	0.00595
Q84R19	AT1G06010	Q84R19	Basic leucine zipper/W2 domain protein	MITOCHONDRION+chloroplast	UNKNOWN	UNKNOWN	MITOCHONDRION	UNKNOWN	0.00039	0.00039	0	0.95238	0.18789	0.00254	0.00333	0.00383	0.00528	0.78124	0.00382	0.00263	0.00176	0.00158	0.00355	0.00256
A0A1P8AV86	AT1G06060	A0A1P8AV86	LisH and RanBPM domains containing protein	CYTOSOL+NUCLEUS	UNKNOWN	UNKNOWN	CYTOSOL	NUCLEUS	0	0.49444	0	0.88095	0.0022	0.47778	0.00122	0.00447	0.00185	0.0048	0.45786	0.00559	0.00466	0.00187	0.02927	0.00843
Q9LNE0	AT1G06070	BZIP69	At1g06070	CYTOSOL+pm	UNKNOWN	UNKNOWN	CYTOSOL	PM	0	0.00571	0	1	0.00304	0.66727	0.03925	0.06606	0.02618	0.00527	0.00406	0.00379	0.15437	0.00765	0.00486	0.0182
Q8LDW8	AT1G06130	GLX2-4	Probable hydroxyacylglutathione hydrolase 2, chloroplastic	MITOCHONDRION+chloroplast	UNKNOWN	UNKNOWN	MITOCHONDRION	CHLOROPLAST	0	0.00144	0	1	0.18805	0.00209	0.00436	0.00401	0.00488	0.78214	0.00248	0.00357	0.00196	0.00189	0.00263	0.00194
A0A1P8AM12	AT1G06190	RHON1	Rho termination factor	CHLOROPLAST	CHLOROPLAST	UNKNOWN	CHLOROPLAST	UNKNOWN	0	0	0	1	0.98655	0.00067	0.00095	0.00086	0.00068	0.00183	0.00361	0.00195	0.00068	0.0005	0.00095	0.00078
Q8W476	AT1G06200	Q8W476	Peptidase S24/S26A/S26B/S26C family protein	MITOCHONDRION	UNKNOWN	UNKNOWN	MITOCHONDRION	UNKNOWN	0	0	0	1	0.00219	0.00083	0.00169	0.00285	0.0037	0.96735	0.01166	0.00466	0.00097	0.00101	0.00225	0.00084
Q9LNC6	AT1G06210	TOL2	TOM1-like protein 2	CYTOSOL+PM+vacuole?	UNKNOWN	UNKNOWN	CYTOSOL	PM	2e-05	0.02519	2e-05	1	0.00248	0.63472	0.00346	0.00478	0.00175	0.00336	0.00214	0.00861	0.20309	0.00251	0.03218	0.10091
Q9LNC5	AT1G06220	CLO	110 kDa U5 small nuclear ribonucleoprotein component CLO	NUCLEUS	UNKNOWN	UNKNOWN	NUCLEUS	UNKNOWN	0	0	0	1	0.00149	0.00352	0.00098	0.00294	0.00116	0.00169	0.98054	0.00188	0.00144	0.00103	0.00159	0.00175
Q9LNC4	AT1G06230	GTE4	Transcription factor GTE4	NUCLEUS	UNKNOWN	UNKNOWN	NUCLEUS	UNKNOWN	0	0	0	0.86905	0.00202	0.00226	0.0008	0.00478	0.00084	0.00326	0.97238	0.00802	0.00113	0.00057	0.00315	0.00078
Q8H109	AT1G06240	Q8H109	Uncharacterized protein At1g06240	MITOCHONDRION+CHLOROPLAST	UNKNOWN	UNKNOWN	MITOCHONDRION	CHLOROPLAST	0	0.48726	0	0.61905	0.46331	0.00185	0.00574	0.00344	0.0056	0.49888	0.00251	0.00788	0.0026	0.00242	0.00262	0.00315
P0CZ23	AT1G06290	ACX3	Acyl-coenzyme A oxidase 3, peroxisomal	PEROXISOME	UNKNOWN	UNKNOWN	PEROXISOME	UNKNOWN	0	0	0	1	0.00211	0.00329	0.00191	0.00384	0.00136	0.00218	0.00739	0.96585	0.00178	0.00254	0.0054	0.00234
Q9LMI1	AT1G06380	Q9LMI1	Ribosomal protein L1p/L10e family	NUCLEUS	UNKNOWN	UNKNOWN	NUCLEUS	UNKNOWN	0	0	0	0.7381	0.00325	0.00178	0.00144	0.02007	0.00213	0.00375	0.95805	0.00279	0.0019	0.001	0.00275	0.0011
P28185	AT1G06400	RABA1A	Ras-related protein RABA1a	ER+PM	UNKNOWN	UNKNOWN	ER	PM	0	0.44776	0	1	0.0039	0.00401	0.47914	0.01645	0.04717	0.00456	0.00276	0.00268	0.36681	0.02479	0.00248	0.04525
Q9LMI0	AT1G06410	TPS7	Probable alpha,alpha-trehalose-phosphate synthase [UDP-forming] 7	CYTOSOL	UNKNOWN	UNKNOWN	CYTOSOL	UNKNOWN	0	0	0	1	0.0011	0.87844	0.00118	0.00319	0.00149	0.0026	0.08589	0.00372	0.00741	0.00237	0.00304	0.00956
Q8W585	AT1G06430	FTSH8	ATP-dependent zinc metalloprotease FTSH 8, chloroplastic	CHLOROPLAST	UNKNOWN	PLASTID MEMBRANE	CHLOROPLAST	UNKNOWN	0	0	0	1	0.98343	0.00077	0.00101	0.0018	0.00115	0.00253	0.00475	0.00108	0.00062	0.00072	0.00125	0.0009
Q208N7	AT1G06460	ACD321	Alpha-crystallin domain 32.1	PEROXISOME+MITOCHONDRION	UNKNOWN	PEROXISOME	PEROXISOME	MITOCHONDRION	0	0.43746	0	0.9881	0.00364	0.01059	0.00611	0.00342	0.00241	0.31995	0.00456	0.48429	0.0482	0.00445	0.03098	0.0814
Q8H184	AT1G06470	Q8H184	Probable sugar phosphate/phosphate translocator At1g06470	TGN	UNKNOWN	TGN	TGN	UNKNOWN	0	0	0	0.85714	0.00327	0.00102	0.01076	0.00624	0.00503	0.00182	0.00283	0.00288	0.00221	0.95676	0.00604	0.00116
Q84K72	AT1G06510	Q84K72	Forkhead-associated domain protein	CHLOROPLAST	UNKNOWN	UNKNOWN	CHLOROPLAST	UNKNOWN	0	0	0	0.86905	0.93224	0.00148	0.00215	0.00131	0.00167	0.04726	0.00213	0.00493	0.00123	0.00088	0.00218	0.00256
Q9SHJ6	AT1G06530	PMD2	Peroxisomal and mitochondrial division factor 2	MITOCHONDRION	MITOCHONDRION	MOM	MITOCHONDRION	UNKNOWN	0	0	0	1	0.00118	0.0015	0.00478	0.00347	0.00283	0.97221	0.00115	0.00352	0.00274	0.00173	0.00376	0.00113
Q9SHJ8	AT1G06550	Q9SHJ8	3-hydroxyisobutyryl-CoA hydrolase-like protein 5	CYTOSOL+chloroplast	UNKNOWN	UNKNOWN	CYTOSOL	CHLOROPLAST	0	0.00703	0	1	0.17859	0.69313	0.00497	0.01452	0.00215	0.00358	0.00385	0.05736	0.00938	0.00288	0.02111	0.00849
Q84MA1	AT1G06560	NOP2C	rRNA	CYTOSOL+mitochondrion?+peroxisome?	UNKNOWN	UNKNOWN	CYTOSOL	MITOCHONDRION	0.00019	0.01072	0.00019	0.88095	0.00265	0.67898	0.0022	0.01156	0.00236	0.14249	0.00568	0.11721	0.00423	0.00459	0.02141	0.00664
P93836	AT1G06570	HPD	4-hydroxyphenylpyruvate dioxygenase	CYTOSOL	UNKNOWN	UNKNOWN	CYTOSOL	UNKNOWN	0	0	0	0.9881	0.00239	0.95226	0.00271	0.01261	0.00295	0.00204	0.0053	0.00171	0.00359	0.00256	0.0083	0.00358
Q8H1U4	AT1G06590	APC5	Anaphase-promoting complex subunit 5	?UNKNOWN+cytosol?+extracellular?	UNKNOWN	UNKNOWN	UNKNOWN	UNKNOWN	0.17512	0.17512	0.02141	0.63095	0.00355	0.13238	0.01231	0.12351	0.00435	0.00579	0.01096	0.00921	0.04923	0.01094	0.60606	0.03173
Q8H1S4	AT1G06650	Q8H1S4	1-aminocyclopropane-1-carboxylate oxidase homolog 3	CYTOSOL	CYTOSOL	CYTOSOL	CYTOSOL	UNKNOWN	0	0	0	1	0.00148	0.9108	0.00185	0.01766	0.00222	0.00264	0.04091	0.00343	0.00557	0.00345	0.00454	0.00544
F4IDQ6	AT1G06670	NIH	DExH-box ATP-dependent RNA helicase DExH2	NUCLEUS	NUCLEUS	NUCLEUS	NUCLEUS	UNKNOWN	0	0	0	1	0.00142	0.00147	0.00083	0.0013	0.00092	0.00145	0.98622	0.00178	0.00098	0.00075	0.0015	0.00137
Q42029	AT1G06680	PSBP1	Oxygen-evolving enhancer protein 2-1, chloroplastic	CHLOROPLAST	CHLOROPLAST	PLASTID MEMBRANE	CHLOROPLAST	UNKNOWN	0	0	0	1	0.98499	0.00061	0.00127	0.00095	0.00076	0.00171	0.00166	0.00439	0.0009	0.00078	0.00098	0.001
Q94A68	AT1G06690	Q94A68	Uncharacterized oxidoreductase At1g06690, chloroplastic	CHLOROPLAST	CHLOROPLAST	UNKNOWN	CHLOROPLAST	UNKNOWN	0	0	0	1	0.98516	0.00089	0.00097	0.00172	0.00063	0.00133	0.00285	0.00317	0.00069	0.00044	0.00141	0.00075
Q8H1G6	AT1G06700	PTI11	PTI1-like tyrosine-protein kinase 1	PM	PM	PM	PM	UNKNOWN	0	0	0	1	0.00135	0.00191	0.00356	0.00255	0.00232	0.00147	0.00219	0.00154	0.96202	0.00444	0.0016	0.01505
A0A1P8AQ62	AT1G06710	MTSF1	Tetratricopeptide repeat	MITOCHONDRION+unknown	UNKNOWN	UNKNOWN	MITOCHONDRION	UNKNOWN	0	0.00341	0	0.75	0.00525	0.01212	0.00436	0.01228	0.004	0.77328	0.01131	0.0072	0.00371	0.00311	0.16088	0.00251
A0A1P8AVE9	AT1G06720	A0A1P8AVE9	P-loop containing nucleoside triphosphate hydrolases superfamily protein	NUCLEUS	NUCLEUS	NUCLEUS	NUCLEUS	UNKNOWN	0	0	0	1	0.00171	0.00111	0.00085	0.00133	0.00116	0.00159	0.98612	0.00204	0.00093	0.00076	0.00125	0.00116
Q9ASV2	AT1G06730	Q9ASV2	At1g06730/F4H5_22	CHLOROPLAST	UNKNOWN	UNKNOWN	CHLOROPLAST	UNKNOWN	0	0	0	0.86905	0.98581	0.00081	0.00098	0.00123	0.00064	0.00104	0.00311	0.00293	0.0008	0.00051	0.00132	0.00083
P26568	AT1G06760	P26568	Histone H1.1	NUCLEUS	UNKNOWN	UNKNOWN	NUCLEUS	UNKNOWN	0	0	0	1	0.01141	0.00097	0.00145	0.0014	0.00158	0.01117	0.91544	0.0476	0.00115	0.00095	0.00608	0.00079
F4IDS0	AT1G06780	GAUT6	Hexosyltransferase	GOLGI	UNKNOWN	UNKNOWN	GOLGI	UNKNOWN	0	0	0	1	0.00301	0.00159	0.02929	0.00507	0.91781	0.00683	0.0021	0.01043	0.00151	0.00439	0.01426	0.0037
F4HNT3	AT1G06790	NRPC7	DNA-directed RNA polymerase subunit	NUCLEUS	UNKNOWN	UNKNOWN	NUCLEUS	UNKNOWN	0	0	0	0.9881	0.0027	0.0014	0.00065	0.00263	0.00075	0.00253	0.98007	0.00494	0.00087	0.00052	0.00221	0.00074
Q9M9Y8	AT1G06820	CRTISO	Prolycopene isomerase, chloroplastic	CHLOROPLAST	CHLOROPLAST	UNKNOWN	CHLOROPLAST	UNKNOWN	0	0	0	1	0.98173	0.00055	0.00368	0.00257	0.00295	0.00056	0.00107	0.00142	0.00125	0.00149	0.00208	0.00064
C0LGD7	AT1G06840	C0LGD7	Probable LRR receptor-like serine/threonine-protein kinase At1g06840	PM	PM	PM	PM	UNKNOWN	0	0	0	1	0.00159	0.00194	0.0063	0.00393	0.0038	0.00167	0.00243	0.00183	0.95431	0.01387	0.00185	0.00649
Q8RXL8	AT1G06890	UXT3	UDP-xylose transporter 3	GOLGI	GOLGI	UNKNOWN	GOLGI	UNKNOWN	0	0	0	1	0.00303	0.00541	0.05118	0.00462	0.85315	0.00336	0.00218	0.0019	0.04193	0.00887	0.00356	0.02081
F4HNU6	AT1G06900	F4HNU6	Nardilysin-like	CYTOSOL	CYTOSOL	CYTOSOL	CYTOSOL	UNKNOWN	0	0	0	1	0.00091	0.96536	0.00251	0.00215	0.00124	0.00142	0.00153	0.0013	0.00828	0.00258	0.00323	0.00948
Q8LPR9	AT1G06950	TIC110	Protein TIC110, chloroplastic	CHLOROPLAST	UNKNOWN	PLASTID MEMBRANE	CHLOROPLAST	UNKNOWN	0	0	0	1	0.95595	0.00037	0.00672	0.00245	0.01613	0.00116	0.00252	0.00969	0.00112	0.00125	0.002	0.00064
Q8L6Z2	AT1G07030	MIT2	At1g07030	MITOCHONDRION	UNKNOWN	UNKNOWN	MITOCHONDRION	UNKNOWN	0	0	0	0.55952	0.00624	0.00613	0.00164	0.00666	0.00337	0.85963	0.05664	0.01249	0.00212	0.00113	0.04235	0.0016
Q9LMJ7	AT1G07040	Q9LMJ7	2-oxoadipate dioxygenase/decarboxylase, chloroplastic	CHLOROPLAST+MITOCHONDRION	UNKNOWN	UNKNOWN	CHLOROPLAST	MITOCHONDRION	0	0.24348	0	1	0.62499	0.00308	0.00439	0.0032	0.00359	0.337	0.00249	0.0088	0.00236	0.00172	0.0048	0.00358
Q8RX33	AT1G07060	DFO	Protein DOUBLE-STRAND BREAK FORMATION	CYTOSOL+MITOCHONDRION	UNKNOWN	UNKNOWN	CYTOSOL	MITOCHONDRION	0	0.46624	0	0.61905	0.00202	0.51441	0.00181	0.00469	0.00277	0.44314	0.00499	0.00284	0.00365	0.00234	0.01009	0.00725
Q93VQ6	AT1G07080	Q93VQ6	At1g07080/F10K1_15	EXTRACELLULAR+cytosol?	UNKNOWN	EXTRACELLULAR	EXTRACELLULAR	UNKNOWN	0	0	0	0.5119	0.00255	0.10991	0.00376	0.81383	0.00449	0.01204	0.00918	0.00553	0.00845	0.00487	0.01724	0.00817
Q9MB58	AT1G07110	FKFBP	6-phosphofructo-2-kinase/fructose-2,6-bisphosphatase	CYTOSOL	UNKNOWN	UNKNOWN	CYTOSOL	UNKNOWN	0	0	0	1	0.00096	0.95228	0.00143	0.00872	0.00121	0.00141	0.00453	0.00631	0.00812	0.00216	0.0036	0.00927
Q9LMK6	AT1G07135	F10K1.16	At1g07135	GOLGI+ER+tgn	UNKNOWN	UNKNOWN	GOLGI	ER	0.00023	0.48492	0.00023	0.72619	0.00528	0.00217	0.30534	0.00462	0.4526	0.00531	0.00238	0.00278	0.02688	0.18192	0.00384	0.00689
Q9LMK7	AT1G07140	RANBP1A	Ran-binding protein 1 homolog a	CYTOSOL	UNKNOWN	UNKNOWN	CYTOSOL	UNKNOWN	0	0	0	1	0.00092	0.87856	0.00365	0.00258	0.00151	0.00226	0.00267	0.00154	0.07886	0.00776	0.00269	0.01699
Q0WMV8	AT1G07170	Q0WMV8	PHD finger-like domain-containing protein 5B	NUCLEUS	UNKNOWN	UNKNOWN	NUCLEUS	UNKNOWN	0	0	0	1	0.00277	0.0019	0.00658	0.03766	0.0107	0.00271	0.92248	0.00253	0.00304	0.00565	0.00271	0.00127
Q8GWA1	AT1G07180	NDA1	Internal alternative NAD(P)H-ubiquinone oxidoreductase A1, mitochondrial	MITOCHONDRION	UNKNOWN	MIM	MITOCHONDRION	UNKNOWN	0	0	0	0.9881	0.00192	0.00143	0.00365	0.00265	0.00252	0.9693	0.0017	0.00665	0.0023	0.00234	0.00449	0.00107
Q9LML3	AT1G07210	Q9LML3	Small ribosomal subunit protein bS18c	MITOCHONDRION	MITOCHONDRION	UNKNOWN	MITOCHONDRION	UNKNOWN	0	0	0	1	0.00542	0.0011	0.00145	0.00207	0.00182	0.97201	0.00288	0.00849	0.0012	0.00124	0.00114	0.00118
Q9LML4	AT1G07220	Q9LML4	F10K1.7 protein	GOLGI	UNKNOWN	UNKNOWN	GOLGI	UNKNOWN	0	0	0	1	0.00096	0.00214	0.00726	0.00487	0.96668	0.00134	0.00196	0.00107	0.00264	0.00486	0.0029	0.00332
Q8L7Y9	AT1G07230	NPC1	Non-specific phospholipase C1	GOLGI+ER	GOLGI	GOLGI CIS	GOLGI	ER	0	0.05677	0	1	0.00363	0.00834	0.26966	0.03501	0.63466	0.0039	0.00249	0.00178	0.00628	0.01942	0.00514	0.00969
Q9FE68	AT1G07240	UGT71C5	UDP-glycosyltransferase 71C5	CYTOSOL	UNKNOWN	UNKNOWN	CYTOSOL	UNKNOWN	0	0	0	0.97619	0.001	0.86527	0.00154	0.00315	0.00116	0.00307	0.00564	0.00207	0.0058	0.00147	0.01234	0.09748
Q9LML6	AT1G07250	UGT71C4	Flavonol 3-O-glucosyltransferase UGT71C4	CYTOSOL	UNKNOWN	UNKNOWN	CYTOSOL	UNKNOWN	0	0	0	1	0.00267	0.89527	0.00763	0.02568	0.00312	0.00248	0.00209	0.00185	0.00975	0.00429	0.02048	0.02469
Q9LNV0	AT1G07310	Q9LNV0	Calcium-dependent lipid-binding	?UNKNOWN+CYTOSOL+extracellular?+nucleus?	UNKNOWN	UNKNOWN	UNKNOWN	UNKNOWN	0.70422	0.70422	0.0728	0.88095	0.00355	0.27979	0.00805	0.13806	0.00524	0.00531	0.13543	0.00983	0.04801	0.00483	0.34654	0.01537
O50061	AT1G07320	RPL4	Large ribosomal subunit protein uL4c	CHLOROPLAST	CHLOROPLAST	PLASTID MEMBRANE	CHLOROPLAST	UNKNOWN	0	0	0	1	0.98506	0.00059	0.00107	0.00136	0.0008	0.00194	0.00407	0.00173	0.00069	0.00068	0.00107	0.00093
Q9LNV5	AT1G07360	Q9LNV5	Zinc finger CCCH domain-containing protein 4	NUCLEUS	NUCLEUS	NUCLEUS	NUCLEUS	UNKNOWN	0	0	0	1	0.00159	0.0013	0.00112	0.00126	0.0011	0.00134	0.98489	0.0021	0.00119	0.00123	0.00147	0.00141
Q9M7Q7	AT1G07370	PCNA	Proliferating cellular nuclear antigen 1	CYTOSOL	UNKNOWN	NUCLEUS	CYTOSOL	UNKNOWN	0	0	0	0.9881	0.00188	0.90423	0.00134	0.01979	0.00192	0.00427	0.04489	0.00333	0.00402	0.00249	0.00432	0.00751
A0A1P8APY2	AT1G07380	ATNCER1	Neutral ceramidase	EXTRACELLULAR+tgn	UNKNOWN	UNKNOWN	EXTRACELLULAR	TGN	0	0.09944	0	1	0.00537	0.00698	0.00965	0.60556	0.00996	0.00314	0.03397	0.01934	0.0086	0.19829	0.0973	0.00183
Q9LNW1	AT1G07410	RABA2B	Ras-related protein RABA2b	PM+er?	UNKNOWN	UNKNOWN	PM	UNKNOWN	0	0	0	1	0.00206	0.00636	0.10673	0.01621	0.01359	0.0029	0.00335	0.00307	0.79095	0.04569	0.00493	0.00418
Q8VWZ8	AT1G07420	SMO2-2	Methylsterol monooxygenase 2-2	ER	UNKNOWN	UNKNOWN	ER	UNKNOWN	0	0	0	1	0.0022	0.00135	0.95536	0.00341	0.00846	0.00125	0.00136	0.00109	0.00587	0.01409	0.00223	0.00335
Q8VZI8	AT1G07510	FTSH10	ATP-dependent zinc metalloprotease FTSH 10, mitochondrial	MITOCHONDRION	MITOCHONDRION	UNKNOWN	MITOCHONDRION	UNKNOWN	0	0	0	1	0.00327	0.00093	0.00144	0.0023	0.00216	0.98024	0.00214	0.00338	0.00109	0.001	0.00101	0.00103
Q9XE58	AT1G07530	SCL14	Scarecrow-like protein 14	CYTOSOL+PEROXISOME	UNKNOWN	UNKNOWN	CYTOSOL	PEROXISOME	0	0.25623	0	0.61905	0.00203	0.56879	0.00165	0.04375	0.00144	0.0523	0.0062	0.29584	0.00637	0.00488	0.00555	0.01119
F4HSD4	AT1G07615	ATOBGM	Probable GTP-binding protein OBGM, mitochondrial	MITOCHONDRION	UNKNOWN	UNKNOWN	MITOCHONDRION	UNKNOWN	0	0	0	1	0.00133	0.00292	0.00126	0.01014	0.00184	0.96757	0.00573	0.00336	0.00116	0.00118	0.0028	0.00073
Q9LQN6	AT1G07630	PLL5	Probable protein phosphatase 2C 4	PM+NUCLEUS	UNKNOWN	UNKNOWN	PM	NUCLEUS	0	0.44756	0	0.84524	0.00573	0.00882	0.00434	0.00684	0.00232	0.00356	0.42247	0.00599	0.52314	0.00346	0.00747	0.00585
P59259	AT1G07660;AT1G07820;AT2G28740;AT3G45930;AT3G46320;AT3G53730;AT5G59690;AT5G59970	; ; ; ; ; ; ;	Histone H4	NUCLEUS+PEROXISOME	UNKNOWN	UNKNOWN	NUCLEUS	PEROXISOME	0	0.03488	0	1	0.00561	0.00155	0.00349	0.00348	0.00851	0.01566	0.68842	0.25368	0.0017	0.00264	0.01423	0.00103
Q9XES1	AT1G07670	ECA4	Calcium-transporting ATPase 4, endoplasmic reticulum-type	PM+ER	UNKNOWN	UNKNOWN	PM	ER	0	0.05323	0	1	0.00476	0.00245	0.21084	0.01636	0.01821	0.00316	0.02514	0.00253	0.68557	0.00915	0.00782	0.01401
Q9C5C5	AT1G07700	Q9C5C5	Thioredoxin-like 4, chloroplastic	CHLOROPLAST	UNKNOWN	PLASTID STROMA	CHLOROPLAST	UNKNOWN	0	0	0	0.85714	0.98219	0.00185	0.00219	0.0015	0.00109	0.00061	0.00102	0.00105	0.00188	0.00107	0.00361	0.00196
Q9LQQ3	AT1G07750	Q9LQQ3	At1g07750/F24B9_13	CYTOSOL	UNKNOWN	UNKNOWN	CYTOSOL	UNKNOWN	0	0	0	1	0.00077	0.95001	0.00282	0.00135	0.00139	0.00168	0.00163	0.00116	0.01342	0.00383	0.00259	0.01935
P42798	AT1G07770;AT5G59850	RPS15AA; RPS15AF	Small ribosomal subunit protein uS8z/uS8w	CYTOSOL	CYTOSOL	RIBOSOMAL	CYTOSOL	UNKNOWN	0	0	0	1	0.00134	0.90545	0.00096	0.01813	0.00133	0.00276	0.03686	0.00875	0.00653	0.00259	0.00435	0.01094
Q42440	AT1G07780	PAI1	N-(5'-phosphoribosyl)anthranilate isomerase 1, chloroplastic	CHLOROPLAST	UNKNOWN	PLASTID STROMA	CHLOROPLAST	UNKNOWN	0	0	0	0.63095	0.97634	0.00092	0.00125	0.00126	0.00102	0.00549	0.00298	0.00521	0.00074	0.00067	0.00326	0.00086
P92939	AT1G07810	ECA1	Calcium-transporting ATPase 1, endoplasmic reticulum-type	ER+PM	UNKNOWN	UNKNOWN	ER	PM	0	0.43841	0	1	0.00557	0.00184	0.52412	0.01173	0.02098	0.00333	0.01184	0.0042	0.39892	0.00857	0.00433	0.00458
Q94JQ7	AT1G07830	Q94JQ7	Large ribosomal subunit protein uL29m	MITOCHONDRION	MITOCHONDRION	UNKNOWN	MITOCHONDRION	UNKNOWN	0	0	0	0.84524	0.00157	0.0009	0.00177	0.00446	0.00472	0.97007	0.00528	0.00629	0.0009	0.00148	0.00199	0.00059
Q9LQQ6	AT1G07840	Q9LQQ6	F24B9.6	NUCLEUS	UNKNOWN	UNKNOWN	NUCLEUS	UNKNOWN	0	0	0	0.72619	0.00157	0.00214	0.00131	0.00071	0.00107	0.00148	0.97508	0.0021	0.00198	0.00098	0.00783	0.00375
Q9LQQ8	AT1G07870	PBL5	Probable serine/threonine-protein kinase PBL5	PM	UNKNOWN	UNKNOWN	PM	UNKNOWN	0	0	0	1	0.00122	0.00216	0.00754	0.0052	0.0034	0.00153	0.003	0.00183	0.94967	0.01231	0.00161	0.01053
Q05431	AT1G07890	APX1	L-ascorbate peroxidase 1, cytosolic	CYTOSOL	UNKNOWN	UNKNOWN	CYTOSOL	UNKNOWN	0	0	0	1	0.00071	0.93551	0.00236	0.00125	0.00109	0.00181	0.00248	0.00124	0.01851	0.00238	0.00288	0.02978
Q0WL81	AT1G07910	RNL	tRNA ligase 1	CYTOSOL+MITOCHONDRION	UNKNOWN	UNKNOWN	CYTOSOL	MITOCHONDRION	0	0.45968	0	1	0.00162	0.51367	0.00153	0.00995	0.002	0.42108	0.00754	0.02125	0.00368	0.00257	0.00776	0.00735
F4HUA0	AT1G07930	F4HUA0	GTP binding Elongation factor Tu family protein	CYTOSOL+pm?+vacuole?	UNKNOWN	UNKNOWN	CYTOSOL	PM	0.00027	0.06662	0.00027	0.9881	0.00109	0.61546	0.00181	0.00903	0.00333	0.00439	0.08104	0.00371	0.13921	0.00392	0.00532	0.13167
Q8W4H7	AT1G07930	A2	Elongation factor 1-alpha 2	CYTOSOL	UNKNOWN	UNKNOWN	CYTOSOL	UNKNOWN	0	0	0	1	0.00099	0.90398	0.00108	0.00389	0.00153	0.00259	0.05411	0.00366	0.00789	0.00272	0.00225	0.0153
A0A1P8ATZ6	AT1G07950	MED22B	Surfeit locus protein 5 subunit 22 of Mediator complex	NUCLEUS	UNKNOWN	UNKNOWN	NUCLEUS	UNKNOWN	0	0	0	0.69048	0.00237	0.00118	0.00077	0.00166	0.00098	0.00187	0.98538	0.00194	0.0009	0.00072	0.00138	0.00084
Q8GYD1	AT1G07960	PDIL5-1	Protein disulfide-isomerase 5-1	ER	UNKNOWN	UNKNOWN	ER	UNKNOWN	0	0	0	1	0.00213	0.00145	0.95561	0.00836	0.00965	0.00176	0.00326	0.00151	0.0038	0.00817	0.00189	0.00239
Q9LN10	AT1G07970	Q9LN10	Cytochrome B561, amino-terminal protein	NUCLEUS+ER	UNKNOWN	UNKNOWN	NUCLEUS	ER	0	0.07275	0	0.86905	0.00747	0.00212	0.25912	0.0159	0.00843	0.00333	0.64303	0.00533	0.01417	0.00514	0.03221	0.00375
Q9LN09	AT1G07980	DPB3-1	DNA polymerase II subunit B3-1	NUCLEUS	UNKNOWN	NUCLEUS	NUCLEUS	UNKNOWN	0	0	0	0.84524	0.00159	0.0192	0.00251	0.00298	0.0018	0.00113	0.93451	0.0024	0.00615	0.00709	0.01795	0.00267
Q8L7T5	AT1G07990	Q8L7T5	At1g07990/T6D22_5	CYTOSOL	UNKNOWN	UNKNOWN	CYTOSOL	UNKNOWN	0	0	0	1	0.00105	0.92058	0.00164	0.00208	0.00097	0.00189	0.01164	0.00258	0.0418	0.00186	0.00434	0.00957
Q3EDG5	AT1G08030	TPST	Protein-tyrosine sulfotransferase	GOLGI	GOLGI	UNKNOWN	GOLGI	UNKNOWN	0	0	0	1	0.00131	0.00123	0.00345	0.00406	0.97664	0.00125	0.00211	0.00132	0.00158	0.00293	0.00261	0.00152
A0A1P8AV11	AT1G08040	A0A1P8AV11	Trimethylguanosine synthase	GOLGI	GOLGI	GOLGI TRANS	GOLGI	UNKNOWN	0	0	0	1	0.00089	0.00107	0.00342	0.00441	0.97684	0.00166	0.00254	0.00128	0.00132	0.00309	0.00212	0.00136
Q9LN03	AT1G08050	Q9LN03	T6D22.13	CYTOSOL	UNKNOWN	UNKNOWN	CYTOSOL	UNKNOWN	0	0	0	1	0.00154	0.85275	0.0047	0.00375	0.00212	0.00229	0.00268	0.00247	0.09989	0.00259	0.01166	0.01356
A0A1P8ASM1	AT1G08060	MOM1	ATP-dependent helicase family protein	NUCLEUS	UNKNOWN	UNKNOWN	NUCLEUS	UNKNOWN	0	0	0	0.5119	0.00193	0.03404	0.00152	0.01329	0.00193	0.00527	0.92436	0.00203	0.00286	0.00159	0.00731	0.00388
B9DH52	AT1G08110	ATGLYI2	Lactoylglutathione lyase	CYTOSOL+CHLOROPLAST	UNKNOWN	UNKNOWN	CYTOSOL	CHLOROPLAST	0	0.23155	0	1	0.25891	0.60798	0.00357	0.00844	0.00271	0.054	0.00396	0.03699	0.00481	0.00238	0.01051	0.00573
F4HUD4	AT1G08125	F4HUD4	S-adenosyl-L-methionine-dependent methyltransferases superfamily protein	CYTOSOL+vacuole?	UNKNOWN	UNKNOWN	CYTOSOL	UNKNOWN	1e-05	1e-05	0	0.72619	0.00113	0.74177	0.00165	0.0094	0.00161	0.0029	0.04254	0.00327	0.03364	0.00146	0.02356	0.13706
Q42572	AT1G08130	LIG1	DNA ligase 1	CHLOROPLAST+MITOCHONDRION+nucleus?	UNKNOWN	UNKNOWN	CHLOROPLAST	MITOCHONDRION	0.00024	0.52279	0.00024	1	0.43711	0.00297	0.00303	0.00521	0.00503	0.40543	0.12272	0.00979	0.00202	0.00116	0.0028	0.00274
P93043	AT1G08190	VPS41	Vacuolar protein sorting-associated protein 41 homolog	VACUOLE	UNKNOWN	UNKNOWN	VACUOLE	UNKNOWN	0	0	0	1	0.00111	0.00615	0.00172	0.00261	0.00162	0.00167	0.00922	0.00211	0.00308	0.00133	0.00266	0.96673
Q9SGE0	AT1G08200	AXS2	UDP-D-apiose/UDP-D-xylose synthase 2	CYTOSOL	UNKNOWN	UNKNOWN	CYTOSOL	UNKNOWN	0	0	0	1	0.00169	0.97128	0.00123	0.00606	0.00155	0.00315	0.00303	0.00131	0.00194	0.00207	0.00288	0.0038
Q0WRX7	AT1G08220	Q0WRX7	ATPase complex subunit	MITOCHONDRION	UNKNOWN	UNKNOWN	MITOCHONDRION	UNKNOWN	0	0	0	0.5119	0.00234	0.00073	0.00448	0.00345	0.00226	0.96587	0.0022	0.01156	0.00223	0.00232	0.0016	0.00095
F4HW04	AT1G08260	POL2A	DNA polymerase epsilon catalytic subunit A	NUCLEUS	UNKNOWN	NUCLEUS	NUCLEUS	UNKNOWN	0	0	0	0.75	0.00259	0.00155	0.00101	0.00476	0.00129	0.00203	0.97969	0.00183	0.00117	0.00077	0.00238	0.00093
Q0WNZ8	AT1G08315	Q0WNZ8	ARM repeat superfamily protein	CHLOROPLAST+VACUOLE	UNKNOWN	UNKNOWN	CHLOROPLAST	VACUOLE	0	0.47875	0	0.84524	0.45508	0.0055	0.0042	0.0024	0.00318	0.00311	0.00387	0.02001	0.05807	0.00126	0.03311	0.41022
F4HW17	AT1G08350	TMN5	Transmembrane 9 superfamily member 5	GOLGI	UNKNOWN	UNKNOWN	GOLGI	UNKNOWN	0	0	0	1	0.0014	0.0013	0.00842	0.00481	0.96621	0.00154	0.00217	0.00159	0.0017	0.00401	0.00442	0.00242
Q8VZB9	AT1G08360	RPL10AA	Large ribosomal subunit protein uL1z	CYTOSOL	CYTOSOL	RIBOSOMAL	CYTOSOL	UNKNOWN	0	0	0	1	0.00127	0.90465	0.00129	0.00865	0.00166	0.0025	0.05	0.00747	0.00672	0.00239	0.00351	0.00989
Q9SJF3	AT1G08370	Q9SJF3	mRNA-decapping enzyme-like protein	CYTOSOL+EXTRACELLULAR	UNKNOWN	UNKNOWN	CYTOSOL	EXTRACELLULAR	0	0.2182	0	0.83333	0.00608	0.5447	0.00586	0.24575	0.00242	0.00473	0.03069	0.0343	0.04819	0.00257	0.01881	0.05589
Q9SJF1	AT1G08410	LSG1-2	GTPase LSG1-2	CYTOSOL+NUCLEUS+vacuole?	UNKNOWN	UNKNOWN	CYTOSOL	NUCLEUS	0	0.2257	0	0.75	0.0014	0.54922	0.00088	0.00198	0.00118	0.0048	0.27525	0.02068	0.00999	0.0016	0.00809	0.12493
F4HW26	AT1G08420	BSL2	Serine/threonine-protein phosphatase	?PM+CYTOSOL+vacuole	UNKNOWN	UNKNOWN	UNKNOWN	UNKNOWN	0.61224	0.61224	0.07441	0.7619	0.0046	0.24742	0.00306	0.06406	0.0015	0.00851	0.01893	0.01057	0.43085	0.01086	0.00279	0.19686
Q9SJE9	AT1G08430	ALMT1	Aluminum-activated malate transporter 1	?MITOCHONDRION+tgn+extracellular?	UNKNOWN	UNKNOWN	UNKNOWN	UNKNOWN	0.35593	0.35593	0.11197	0.75	0.00226	0.00454	0.05169	0.12202	0.00307	0.51463	0.00175	0.04807	0.0415	0.19973	0.00501	0.00574
O04153	AT1G08450	CRT3	Calreticulin-3	ER	ER	ER	ER	UNKNOWN	0	0	0	1	0.00216	0.00153	0.9438	0.00979	0.01243	0.00162	0.00711	0.00172	0.00414	0.0113	0.00225	0.00215
Q94EJ2	AT1G08460	HDA8	Histone deacetylase 8	CYTOSOL	UNKNOWN	UNKNOWN	CYTOSOL	UNKNOWN	0	0	0	0.77381	0.0018	0.89993	0.00209	0.04505	0.00234	0.00615	0.00619	0.00793	0.00385	0.00247	0.00751	0.01468
Q8VWF6	AT1G08470	SSL3	Protein STRICTOSIDINE SYNTHASE-LIKE 3	ER	ER	ER	ER	UNKNOWN	0	0	0	1	0.00317	0.00114	0.95847	0.00215	0.01415	0.00235	0.00155	0.00127	0.0053	0.00503	0.00194	0.00348
Q941A6	AT1G08480	SDH6	Succinate dehydrogenase subunit 6, mitochondrial	MITOCHONDRION	MITOCHONDRION	MIM	MITOCHONDRION	UNKNOWN	0	0	0	1	0.01347	0.00098	0.00186	0.00198	0.00263	0.96801	0.00215	0.0041	0.00125	0.00119	0.00111	0.00126
Q93WX6	AT1G08490	NFS2	Cysteine desulfurase 1, chloroplastic	CHLOROPLAST	CHLOROPLAST	PLASTID STROMA	CHLOROPLAST	UNKNOWN	0	0	0	1	0.98543	0.00099	0.0017	0.00092	0.00063	0.00086	0.00104	0.00213	0.0017	0.00063	0.00219	0.00178
Q9SJE1	AT1G08520	CHLD	Magnesium-chelatase subunit ChlD, chloroplastic	CHLOROPLAST	CHLOROPLAST	UNKNOWN	CHLOROPLAST	UNKNOWN	0	0	0	1	0.98611	0.00057	0.00108	0.00107	0.00071	0.00137	0.0036	0.00243	0.00067	0.00056	0.00112	0.0007
Q0WNC2	AT1G08530	Q0WNC2	Chitinase-like protein	CHLOROPLAST	CHLOROPLAST	UNKNOWN	CHLOROPLAST	UNKNOWN	0	0	0	1	0.97372	0.00113	0.00351	0.00246	0.00208	0.00057	0.00145	0.00537	0.00161	0.00083	0.00636	0.00091
Q39249	AT1G08550	VDE1	Violaxanthin de-epoxidase, chloroplastic	CHLOROPLAST	CHLOROPLAST	PLASTID MEMBRANE	CHLOROPLAST	UNKNOWN	0	0	0	0.95238	0.9877	0.00058	0.00156	0.00079	0.00076	0.00119	0.0012	0.00163	0.00129	0.00071	0.00116	0.00142
Q42374	AT1G08560	KN	Syntaxin-related protein KNOLLE	?PM+PEROXISOME+vacuole?+cytosol?	UNKNOWN	UNKNOWN	UNKNOWN	UNKNOWN	0.57354	0.57354	0.01609	1	0.0021	0.10777	0.00257	0.00892	0.00267	0.00328	0.01339	0.30472	0.3601	0.00474	0.07182	0.11791
Q93WG3	AT1G08640	CJD1	Protein CHLOROPLAST J-LIKE DOMAIN 1, chloroplastic	CHLOROPLAST	CHLOROPLAST	PLASTID MEMBRANE	CHLOROPLAST	UNKNOWN	0	0	0	1	0.96851	0.00024	0.00972	0.00517	0.00578	0.0008	0.00168	0.00358	0.00126	0.00142	0.00131	0.00054
Q8VZJ0	AT1G08660	SIA1	Sialyltransferase-like protein 1	GOLGI	GOLGI	GOLGI TRANS	GOLGI	UNKNOWN	0	0	0	1	0.00157	0.00077	0.00241	0.00292	0.97835	0.00169	0.00269	0.00212	0.00117	0.00229	0.00293	0.00108
F4HXP0	AT1G08680	ZIGA4	ARF GAP-like zinc finger-containing protein ZIGA4	PM+CYTOSOL	UNKNOWN	UNKNOWN	PM	CYTOSOL	0	0.17676	0	1	0.00159	0.28161	0.00192	0.01128	0.00228	0.00333	0.01501	0.00307	0.60404	0.00221	0.0223	0.05135
O64668	AT1G08700	O64668	Presenilin-like protein At1g08700	TGN	UNKNOWN	UNKNOWN	TGN	UNKNOWN	0	0	0	0.86905	0.00084	0.00955	0.01148	0.0024	0.00695	0.00217	0.00377	0.00325	0.05592	0.887	0.00707	0.00961
Q9FPR3	AT1G08720	EDR1	Serine/threonine-protein kinase EDR1	CYTOSOL+pm?	UNKNOWN	UNKNOWN	CYTOSOL	UNKNOWN	0	0	0	1	0.00139	0.83997	0.00228	0.00774	0.0013	0.0023	0.01962	0.00518	0.10232	0.00228	0.00677	0.00885
Q8GYI6	AT1G08750	GPI8	Peptidase C13 family	ER	ER	ER	ER	UNKNOWN	0	0	0	1	0.00242	0.0019	0.95305	0.00354	0.01477	0.00194	0.00166	0.00095	0.00563	0.00849	0.00206	0.00359
Q9FRR2	AT1G08760	CORD2	At1g08760	PM	UNKNOWN	UNKNOWN	PM	UNKNOWN	0	0	0	0.86905	0.0061	0.00372	0.00966	0.009	0.00188	0.00289	0.02719	0.01308	0.7773	0.00311	0.04828	0.09779
Q9FRR1	AT1G08770	PRA1E	PRA1 family protein E	PM+TGN+cytosol?	UNKNOWN	UNKNOWN	PM	TGN	1e-05	0.17895	1e-05	0.9881	0.0018	0.11686	0.00885	0.02154	0.00535	0.00411	0.00264	0.00654	0.56712	0.22326	0.00348	0.03848
Q9M4B5	AT1G08780	PFD4	Prefoldin subunit 4	CYTOSOL	UNKNOWN	UNKNOWN	CYTOSOL	UNKNOWN	0	0	0	1	0.00117	0.96295	0.00208	0.00131	0.00101	0.00221	0.00176	0.00285	0.00865	0.00198	0.00476	0.00927
B9DHD7	AT1G08820	PVA22	Vesicle-associated protein 2-2	PM+er?	PM	PM	PM	UNKNOWN	0	0	0	1	0.00444	0.00227	0.10984	0.01243	0.05993	0.00454	0.00472	0.0025	0.77882	0.01318	0.00269	0.00463
Q8GW22	AT1G08845	HES	At1g08850	MITOCHONDRION	UNKNOWN	UNKNOWN	MITOCHONDRION	UNKNOWN	0	0	0	0.88095	0.00511	0.00105	0.00183	0.00264	0.00215	0.94428	0.01205	0.02504	0.00133	0.00135	0.00181	0.00138
Q5XQC7	AT1G08860	BON3	Protein BONZAI 3	PM	UNKNOWN	UNKNOWN	PM	UNKNOWN	0	0	0	1	0.00482	0.00132	0.00704	0.00355	0.00093	0.00321	0.00316	0.01109	0.94761	0.005	0.0091	0.00318
O04848	AT1G08880	O04848	Probable histone H2AXa	NUCLEUS	UNKNOWN	UNKNOWN	NUCLEUS	UNKNOWN	0	0	0	1	0.00176	0.00194	0.00161	0.00055	0.00068	0.00131	0.96753	0.01323	0.00282	0.00122	0.00345	0.00389
O04034	AT1G08960	CCX5	Cation/calcium exchanger 5	GOLGI+TGN	UNKNOWN	UNKNOWN	GOLGI	TGN	0	0.35174	0	0.97619	0.00149	0.00174	0.01302	0.01015	0.57901	0.00293	0.00264	0.00226	0.00192	0.38043	0.00249	0.0019
Q8L4B2	AT1G08970	NFYC9	Nuclear transcription factor Y subunit C-9	NUCLEUS	UNKNOWN	UNKNOWN	NUCLEUS	UNKNOWN	0	0	0	0.86905	0.00173	0.0174	0.00707	0.00662	0.00163	0.00274	0.88292	0.00353	0.05217	0.01209	0.00329	0.00883
Q9FR37	AT1G08980	AMI1	Amidase 1	CYTOSOL	CYTOSOL	CYTOSOL	CYTOSOL	UNKNOWN	0	0	0	1	0.00165	0.96965	0.00245	0.00233	0.00147	0.00212	0.00138	0.00131	0.00405	0.00207	0.00586	0.00566
Q75W54	AT1G09010	EBM	Mannosylglycoprotein endo-beta-mannosidase	EXTRACELLULAR+NUCLEUS	UNKNOWN	UNKNOWN	EXTRACELLULAR	NUCLEUS	0	0.4774	0	1	0.00506	0.05008	0.00399	0.48685	0.00497	0.01234	0.39833	0.01093	0.01132	0.00452	0.00645	0.00516
Q944A6	AT1G09020	SNF4	Sucrose nonfermenting 4-like protein	CYTOSOL+nucleus?	UNKNOWN	UNKNOWN	CYTOSOL	UNKNOWN	0	0	0	1	0.00106	0.84584	0.00108	0.00299	0.00154	0.00302	0.10669	0.00375	0.01342	0.00354	0.00299	0.01408
F4HZD1	AT1G09060	JMJ24	E3 ubiquitin-protein ligase JMJ24	NUCLEUS	UNKNOWN	UNKNOWN	NUCLEUS	UNKNOWN	0	0	0	0.83333	0.00156	0.00114	0.00284	0.00371	0.00301	0.00132	0.97719	0.00181	0.0016	0.00232	0.00264	0.00086
O04023	AT1G09070	SRC2	Protein SRC2 homolog	CYTOSOL+PM	UNKNOWN	UNKNOWN	CYTOSOL	PM	0	0.47886	0	1	0.00233	0.47634	0.00853	0.03962	0.00259	0.0041	0.01751	0.00542	0.42527	0.00488	0.00732	0.00611
Q8H1B3	AT1G09080	BIP3	Heat shock 70 kDa protein BIP3	EXTRACELLULAR	UNKNOWN	UNKNOWN	EXTRACELLULAR	UNKNOWN	0	0	0	1	0.00734	0.00178	0.01593	0.88629	0.06741	0.00682	0.0016	0.00335	0.00264	0.00336	0.00163	0.00186
O04019	AT1G09100	RPT5B	26S proteasome regulatory subunit 6A homolog B	CYTOSOL	UNKNOWN	UNKNOWN	CYTOSOL	UNKNOWN	0	0	0	0.7619	0.00232	0.87304	0.00131	0.01983	0.00121	0.00349	0.01753	0.00537	0.00448	0.00159	0.00392	0.06589
F4HZE0	AT1G09130	F4HZE0	ATP-dependent Clp protease proteolytic subunit	CHLOROPLAST	UNKNOWN	PLASTID STROMA	CHLOROPLAST	UNKNOWN	0	0	0	1	0.98442	0.00082	0.00208	0.00134	0.00106	0.00064	0.0013	0.00277	0.00136	0.0006	0.00263	0.001
Q9XFR5	AT1G09140	SR30	Serine/arginine-rich splicing factor SR30	NUCLEUS	NUCLEUS	NUCLEUS	NUCLEUS	UNKNOWN	0	0	0	1	0.00164	0.00169	0.00085	0.00131	0.00125	0.00151	0.98538	0.00178	0.00102	0.00097	0.00154	0.00106
Q8L7N2	AT1G09150	Q8L7N2	Pseudouridine synthase and archaeosine transglycosylase	NUCLEUS+CYTOSOL	UNKNOWN	UNKNOWN	NUCLEUS	CYTOSOL	0	0.44488	0	1	0.00143	0.41879	0.0017	0.00293	0.00204	0.00404	0.52837	0.00375	0.01462	0.0034	0.00406	0.01486
O80492	AT1G09160	O80492	Probable protein phosphatase 2C 5	PM	UNKNOWN	UNKNOWN	PM	UNKNOWN	0	0	0	1	0.0018	0.00302	0.01738	0.00882	0.00886	0.00146	0.00432	0.00188	0.93608	0.00609	0.00507	0.00523
O80489	AT1G09180	SARA1A	small monomeric GTPase	?ER+vacuole?+peroxisome?	UNKNOWN	UNKNOWN	UNKNOWN	UNKNOWN	0.21145	0.21145	0.03328	0.7619	0.00514	0.04274	0.45627	0.08652	0.01539	0.00745	0.00537	0.12562	0.07121	0.0085	0.04897	0.12683
O80488	AT1G09190	PCMP-E70	Pentatricopeptide repeat-containing protein At1g09190	MITOCHONDRION	UNKNOWN	UNKNOWN	MITOCHONDRION	UNKNOWN	0	0	0	0.5119	0.03343	0.00222	0.00222	0.00343	0.00311	0.92072	0.01457	0.00374	0.00145	0.00113	0.01255	0.00145
P59226	AT1G09200;AT3G27360;AT5G10390;AT5G10400;AT5G65360	HTR2; HTR3; HTR13; HTR9; HTR1	Histone H3.1	NUCLEUS	UNKNOWN	NUCLEUS	NUCLEUS	UNKNOWN	0	0	0	1	0.00383	0.00067	0.00245	0.006	0.01285	0.00689	0.91783	0.03314	0.00099	0.00139	0.01332	0.00063
Q38858	AT1G09210	CRT2	Calreticulin-2	ER	ER	ER	ER	UNKNOWN	0	0	0	1	0.0024	0.00129	0.956	0.00251	0.01365	0.00234	0.00149	0.00124	0.00601	0.00717	0.00189	0.00401
O80480	AT1G09270	IMPA4	Importin subunit alpha-4	CYTOSOL+NUCLEUS	UNKNOWN	UNKNOWN	CYTOSOL	NUCLEUS	0	0.45756	0	1	0.00168	0.48778	0.00209	0.00692	0.00277	0.00378	0.39839	0.00273	0.01687	0.00295	0.05141	0.02264
Q94AC1	AT1G09280	STR6	Rhodanese-like domain-containing protein 6	PM+unknown+nucleus?	UNKNOWN	UNKNOWN	PM	UNKNOWN	0	0.15912	0	0.61905	0.00317	0.023	0.00417	0.00739	0.00577	0.00342	0.11527	0.00502	0.58783	0.0116	0.18313	0.05022
Q7XBQ8	AT1G09290	Q7XBQ8	Uncharacterized protein At1g09290	EXTRACELLULAR	UNKNOWN	UNKNOWN	EXTRACELLULAR	UNKNOWN	0	0	0	0.88095	0.00324	0.08557	0.00349	0.84907	0.00448	0.01212	0.00547	0.00438	0.007	0.00521	0.01308	0.00688
F4HZG9	AT1G09300	ICP55	Intermediate cleaving peptidase 55, mitochondrial	MITOCHONDRION	MITOCHONDRION	UNKNOWN	MITOCHONDRION	UNKNOWN	0	0	0	1	0.00223	0.00153	0.00165	0.00251	0.00205	0.94535	0.02678	0.01138	0.0015	0.00116	0.00239	0.00148
Q8LEK2	AT1G09330	ECH	Golgi apparatus membrane protein-like protein ECHIDNA	TGN	UNKNOWN	UNKNOWN	TGN	UNKNOWN	0	0	0	1	0.0012	0.00769	0.01113	0.00315	0.00417	0.00274	0.0024	0.00297	0.0282	0.89345	0.00461	0.03829
Q93ZW0	AT1G09420	G6PD4	Inactive glucose-6-phosphate 1-dehydrogenase 4, chloroplastic	CHLOROPLAST	CHLOROPLAST	UNKNOWN	CHLOROPLAST	UNKNOWN	0	0	0	0.86905	0.9674	0.0008	0.00099	0.00154	0.00092	0.00117	0.02119	0.0026	0.00082	0.00051	0.00135	0.00071
O80526	AT1G09430	ACLA-3	ATP-citrate synthase alpha chain protein 3	CYTOSOL	UNKNOWN	UNKNOWN	CYTOSOL	UNKNOWN	0	0	0	1	0.00121	0.9527	0.00157	0.01103	0.00162	0.00199	0.00608	0.00156	0.00338	0.00176	0.00546	0.01165
O80532	AT1G09490	O80532	At1g09490/F14J9_15	CYTOSOL	UNKNOWN	UNKNOWN	CYTOSOL	UNKNOWN	0	0	0	1	0.00135	0.88463	0.0059	0.01368	0.00298	0.0033	0.00167	0.00145	0.00744	0.00386	0.01437	0.05937
O80535	AT1G09520	O80535	At1g09520/F14J9_18	NUCLEUS	UNKNOWN	UNKNOWN	NUCLEUS	UNKNOWN	0	0	0	0.9881	0.00144	0.00256	0.00228	0.00123	0.00096	0.00105	0.97392	0.00233	0.00424	0.002	0.0036	0.00439
P94014	AT1G09560	GLP4	Germin-like protein subfamily 2 member 1	NUCLEUS	UNKNOWN	UNKNOWN	NUCLEUS	UNKNOWN	0	0	0	1	0.00243	0.00054	0.00137	0.00135	0.00264	0.00191	0.9821	0.00339	0.0008	0.00107	0.0017	0.00069
P14712	AT1G09570	PHYA	Phytochrome A	NUCLEUS+chloroplast?	UNKNOWN	UNKNOWN	NUCLEUS	UNKNOWN	0	0	0	0.60714	0.1189	0.0012	0.00249	0.00367	0.00285	0.00174	0.83953	0.00445	0.00158	0.00113	0.02168	0.00078
F4I111	AT1G09575	MCU1	Calcium uniporter protein 1, mitochondrial	MITOCHONDRION	UNKNOWN	UNKNOWN	MITOCHONDRION	UNKNOWN	0	0	0	0.52381	0.01717	0.00109	0.00344	0.00452	0.00373	0.95975	0.00199	0.00124	0.00157	0.00217	0.00218	0.00115
Q6IDL4	AT1G09580	Q6IDL4	Transmembrane emp24 domain-containing protein p24delta3	ER	UNKNOWN	UNKNOWN	ER	UNKNOWN	0	0	0	1	0.00343	0.00237	0.92298	0.00526	0.03843	0.00251	0.00181	0.00142	0.00409	0.0075	0.00408	0.00613
Q43291	AT1G09590;AT1G09690	RPL21A; RPL21C	Large ribosomal subunit protein eL21z/eL21y	CYTOSOL	UNKNOWN	RIBOSOMAL	CYTOSOL	UNKNOWN	0	0	0	1	0.00194	0.81712	0.00443	0.05373	0.0033	0.00419	0.00462	0.00211	0.01258	0.00312	0.00886	0.08401
F4I116	AT1G09620	F4I116	Leucine--tRNA ligase, cytoplasmic	CYTOSOL+MITOCHONDRION	UNKNOWN	UNKNOWN	CYTOSOL	MITOCHONDRION	0	0.33087	0	1	0.00222	0.58618	0.00174	0.0026	0.00216	0.36368	0.00428	0.01259	0.00449	0.00281	0.00544	0.0118
O04486	AT1G09630	RABA2A	Ras-related protein RABA2a	PM	UNKNOWN	CYTOSOL	PM	UNKNOWN	0	0	0	1	0.00152	0.02615	0.00915	0.03147	0.00446	0.00237	0.00684	0.00278	0.89903	0.01082	0.00243	0.00298
O04487	AT1G09640	O04487	Probable elongation factor 1-gamma 1	NUCLEUS+CYTOSOL	UNKNOWN	UNKNOWN	NUCLEUS	CYTOSOL	0	0.41452	0	1	0.00167	0.40779	0.0015	0.00296	0.00196	0.00423	0.5528	0.00394	0.00615	0.00253	0.00462	0.00984
Q6GKX8	AT1G09645	Q6GKX8	At1g09645	TGN	TGN	TGN	TGN	UNKNOWN	0	0	0	1	0.00133	0.00542	0.00437	0.02131	0.00757	0.00171	0.00438	0.00238	0.00188	0.94449	0.00366	0.00151
Q8L7S0	AT1G09730	ULP2B	Probable ubiquitin-like-specific protease 2B	NUCLEUS	UNKNOWN	UNKNOWN	NUCLEUS	UNKNOWN	0	0	0	0.79762	0.00235	0.00125	0.00095	0.00271	0.00166	0.00174	0.98332	0.00145	0.001	0.001	0.00185	0.00072
Q84TF6	AT1G09740	Q84TF6	Adenine nucleotide alpha hydrolases-like superfamily protein	VACUOLE	UNKNOWN	UNKNOWN	VACUOLE	UNKNOWN	0	0	0	1	0.00175	0.06491	0.00291	0.0151	0.00255	0.00197	0.0055	0.00544	0.02486	0.00166	0.01284	0.86052
P43333	AT1G09760	U2A'	U2 small nuclear ribonucleoprotein A'	NUCLEUS	UNKNOWN	UNKNOWN	NUCLEUS	UNKNOWN	0	0	0	1	0.00168	0.00189	0.00081	0.00192	0.00113	0.00173	0.98457	0.00192	0.0011	0.00089	0.00118	0.00117
P92948	AT1G09770	CDC5	Cell division cycle 5-like protein	NUCLEUS	NUCLEUS	NUCLEUS	NUCLEUS	UNKNOWN	0	0	0	1	0.00166	0.00125	0.00086	0.00138	0.00123	0.00158	0.98603	0.00177	0.00094	0.00084	0.00127	0.00119
O04499	AT1G09780	PGM1	2,3-bisphosphoglycerate-independent phosphoglycerate mutase 1	CYTOSOL	UNKNOWN	UNKNOWN	CYTOSOL	UNKNOWN	0	0	0	1	0.00086	0.91198	0.00271	0.00172	0.00123	0.00195	0.00303	0.00162	0.05208	0.00365	0.00288	0.01629
F4I2K8	AT1G09794	F4I2K8	Cox19 family protein	MITOCHONDRION	UNKNOWN	UNKNOWN	MITOCHONDRION	UNKNOWN	0	0	0	0.7619	0.00185	0.00221	0.0067	0.0044	0.00311	0.95033	0.00259	0.00621	0.00389	0.00244	0.01404	0.00222
Q8GSJ1	AT1G09795	HISN1B	ATP phosphoribosyltransferase 2, chloroplastic	CHLOROPLAST	CHLOROPLAST	PLASTID STROMA	CHLOROPLAST	UNKNOWN	0	0	0	1	0.98323	0.00234	0.00134	0.00267	0.00097	0.00066	0.0019	0.00103	0.00114	0.00074	0.0027	0.00128
F4I2L0	AT1G09800	F4I2L0	tRNA pseudouridine synthase	CYTOSOL+mitochondrion	UNKNOWN	UNKNOWN	CYTOSOL	UNKNOWN	0.00049	0.00049	0	0.88095	0.00331	0.75119	0.00141	0.04009	0.00216	0.1537	0.00621	0.01121	0.00306	0.00176	0.02105	0.00484
P52420	AT1G09830	PUR2	Phosphoribosylamine--glycine ligase, chloroplastic	CHLOROPLAST	CHLOROPLAST	PLASTID STROMA	CHLOROPLAST	UNKNOWN	0	0	0	1	0.98768	0.00067	0.0011	0.00101	0.00067	0.00124	0.00219	0.00179	0.0008	0.00054	0.00126	0.00105
Q39019	AT1G09840	ASK10	Shaggy-related protein kinase kappa	PM	UNKNOWN	UNKNOWN	PM	UNKNOWN	0	0	0	0.86905	0.0038	0.0209	0.00219	0.0118	0.00309	0.00132	0.00941	0.00295	0.87376	0.00248	0.01181	0.05648
Q0WVJ5	AT1G09850	XBCP3	At1g09850	?GOLGI+CYTOSOL+pm?	UNKNOWN	UNKNOWN	UNKNOWN	UNKNOWN	0.54952	0.54952	0.00419	1	0.00484	0.20224	0.05659	0.01215	0.46117	0.00642	0.00318	0.01102	0.12359	0.00628	0.02991	0.08261
Q941B2	AT1G09870	Q941B2	Multiple inositol polyphosphate phosphatase 1	ER	ER	ER	ER	UNKNOWN	0	0	0	1	0.00178	0.00136	0.95565	0.00507	0.01006	0.00139	0.00247	0.0012	0.00502	0.01183	0.00172	0.00244
Q3EDF8	AT1G09900	Q3EDF8	Pentatricopeptide repeat-containing protein At1g09900	CHLOROPLAST+EXTRACELLULAR	UNKNOWN	UNKNOWN	CHLOROPLAST	EXTRACELLULAR	0	0.399	0	1	0.54138	0.02886	0.00461	0.38474	0.00353	0.00296	0.0154	0.00407	0.00552	0.00211	0.00455	0.00228
F4I2M8	AT1G09910	F4I2M8	rhamnogalacturonan endolyase	CYTOSOL+PM	UNKNOWN	UNKNOWN	CYTOSOL	PM	0	0.43633	0	0.88095	0.00226	0.48275	0.01391	0.05422	0.00434	0.00398	0.01186	0.005	0.34392	0.00554	0.0608	0.01143
Q8L7A5	AT1G09920	Q8L7A5	Expressed protein	ER+PEROXISOME	UNKNOWN	UNKNOWN	ER	PEROXISOME	0	0.48445	0	1	0.01595	0.00345	0.46039	0.00596	0.03773	0.01259	0.01733	0.40893	0.00668	0.0122	0.01582	0.00298
Q9FE59	AT1G09960	SUC4	Sucrose transport protein SUC4	VACUOLE+CYTOSOL	UNKNOWN	UNKNOWN	VACUOLE	CYTOSOL	0	0.03066	0	1	0.00287	0.23224	0.00482	0.06336	0.00385	0.00625	0.00465	0.00389	0.01056	0.00315	0.00653	0.65784
O80593	AT1G10020	O80593	At1g10020	PM+unknown?	UNKNOWN	UNKNOWN	PM	UNKNOWN	0	0.00113	0	0.67857	0.00274	0.0254	0.0123	0.00784	0.01597	0.00401	0.00407	0.00668	0.69929	0.00541	0.13167	0.08463
Q2V4P2	AT1G10070	BCAT-2	Branched-chain-amino-acid aminotransferase	MITOCHONDRION+UNKNOWN	UNKNOWN	UNKNOWN	MITOCHONDRION	UNKNOWN	0	0.13636	0	0.71429	0.01272	0.0613	0.00444	0.00207	0.00263	0.64572	0.00504	0.00651	0.0152	0.00238	0.21411	0.02789
A0A1P8AUX8	AT1G10095	A0A1P8AUX8	Protein prenylyltransferase superfamily protein	CYTOSOL	UNKNOWN	UNKNOWN	CYTOSOL	UNKNOWN	0.00023	0.00023	0	0.72619	0.00121	0.72075	0.00778	0.0201	0.00853	0.00261	0.00816	0.00218	0.08069	0.0084	0.08678	0.0528
Q9SY55	AT1G10130	ECA3	Calcium-transporting ATPase 3, endoplasmic reticulum-type	GOLGI	GOLGI	UNKNOWN	GOLGI	UNKNOWN	0	0	0	1	0.00329	0.0011	0.06446	0.00566	0.89933	0.00244	0.00204	0.00167	0.0037	0.00861	0.00354	0.00418
Q9SY56	AT1G10140	Q9SY56	At1g10140	PM	UNKNOWN	UNKNOWN	PM	UNKNOWN	0	0	0	1	0.00283	0.00162	0.00695	0.00349	0.00175	0.03121	0.00228	0.00903	0.92635	0.00182	0.00364	0.00905
Q9SY57	AT1G10150	PP2A10	Protein PHLOEM PROTEIN 2-LIKE A10	?PEROXISOME+UNKNOWN+chloroplast	UNKNOWN	UNKNOWN	UNKNOWN	UNKNOWN	0.67429	0.67429	0.06195	0.83333	0.18547	0.0037	0.02002	0.00604	0.07172	0.02217	0.01507	0.35604	0.00578	0.00608	0.30492	0.00299
A0A1P8AVZ2	AT1G10170	NFXL1	NF-X-like 1	CYTOSOL+vacuole	UNKNOWN	UNKNOWN	CYTOSOL	VACUOLE	0	0.00361	0	1	0.00241	0.70994	0.00444	0.07603	0.00351	0.0058	0.00488	0.00603	0.01048	0.00287	0.01429	0.15933
Q9SY60	AT1G10180	EXO84C	Exocyst complex component EXO84C	PM	UNKNOWN	PM	PM	UNKNOWN	0	0	0	1	0.00395	0.04349	0.05245	0.06522	0.01383	0.0046	0.01653	0.00419	0.77956	0.00348	0.00952	0.00318
Q94JX5	AT1G10200	WLIM1	LIM domain-containing protein WLIM1	VACUOLE+PM	UNKNOWN	UNKNOWN	VACUOLE	PM	0	0.48664	0	0.88095	0.00606	0.00582	0.00574	0.00721	0.00322	0.00228	0.02974	0.0122	0.444	0.00174	0.01965	0.46234
Q9SY65	AT1G10230	ASK18	SKP1-like protein 18	CYTOSOL+NUCLEUS	UNKNOWN	UNKNOWN	CYTOSOL	NUCLEUS	0	0.01101	0	0.75	0.00199	0.71254	0.00216	0.01003	0.00287	0.00331	0.2301	0.00391	0.00706	0.00798	0.01031	0.00774
Q9SY69	AT1G10270	GRP23	Pentatricopeptide repeat-containing protein At1g10270	MITOCHONDRION	MITOCHONDRION	UNKNOWN	MITOCHONDRION	UNKNOWN	0	0	0	1	0.0039	0.0015	0.00119	0.00221	0.00167	0.97537	0.00512	0.00449	0.00112	0.00083	0.00159	0.001
Q9SY70	AT1G10280	Q9SY70	At1g10280	GOLGI	UNKNOWN	UNKNOWN	GOLGI	UNKNOWN	0	0	0	0.85714	0.0019	0.00169	0.00354	0.02123	0.94025	0.00145	0.00927	0.00184	0.00101	0.00763	0.00908	0.00111
Q9SE83	AT1G10290	DRP2A	Dynamin-2A	PM	UNKNOWN	UNKNOWN	PM	UNKNOWN	0	0	0	1	0.00486	0.00321	0.06688	0.00876	0.00488	0.00429	0.00662	0.07193	0.77985	0.00202	0.00939	0.03732
Q9SY73	AT1G10310	Q9SY73	NADPH-dependent pterin aldehyde reductase	MITOCHONDRION+peroxisome?	UNKNOWN	UNKNOWN	MITOCHONDRION	UNKNOWN	4e-05	4e-05	0	1	0.00427	0.00905	0.00404	0.00192	0.00181	0.77484	0.00564	0.10589	0.02262	0.00355	0.03235	0.03401
Q9SY77	AT1G10350	Q9SY77	DNAJ heat shock family protein	VACUOLE+NUCLEUS	UNKNOWN	UNKNOWN	VACUOLE	NUCLEUS	0	0.40651	0	0.66667	0.00258	0.01754	0.00264	0.00216	0.0033	0.00434	0.33911	0.0638	0.01102	0.00253	0.07024	0.48071
Q8RY25	AT1G10390	NUP98A	Nuclear pore complex protein NUP98A	NUCLEUS	UNKNOWN	UNKNOWN	NUCLEUS	UNKNOWN	0	0	0	1	0.00143	0.01634	0.00085	0.00058	0.00071	0.00156	0.96136	0.00257	0.00246	0.00079	0.0049	0.00645
Q8LPT2	AT1G10410	Q8LPT2	At1g10410/F14N23_31	PM+er	UNKNOWN	UNKNOWN	PM	ER	0	0.00902	0	0.86905	0.00344	0.00561	0.18669	0.01924	0.01213	0.00291	0.00957	0.00223	0.71774	0.00551	0.01193	0.02302
Q07098	AT1G10430	PP2A2	Serine/threonine-protein phosphatase PP2A-2 catalytic subunit	CYTOSOL+PM	UNKNOWN	UNKNOWN	CYTOSOL	PM	0	0.2797	0	0.9881	0.00203	0.5722	0.00577	0.04302	0.00164	0.00451	0.0076	0.00534	0.32209	0.01918	0.00266	0.01397
Q9XIK6	AT1G10450	SNL6	Paired amphipathic helix protein Sin3-like 6	NUCLEUS	UNKNOWN	UNKNOWN	NUCLEUS	UNKNOWN	0	0	0	0.92857	0.00229	0.00081	0.00136	0.00125	0.00117	0.00272	0.96914	0.01504	0.00097	0.00093	0.00323	0.0011
Q9XIK4	AT1G10490	Q9XIK4	RNA cytidine acetyltransferase 1	NUCLEUS	UNKNOWN	UNKNOWN	NUCLEUS	UNKNOWN	0	0	0	1	0.00197	0.00119	0.0009	0.00103	0.00117	0.00146	0.9856	0.00213	0.00092	0.0011	0.0013	0.0012
Q9XIK3	AT1G10500	ISCA	Iron-sulfur assembly protein IscA, chloroplastic	CHLOROPLAST+EXTRACELLULAR	UNKNOWN	PLASTID STROMA	CHLOROPLAST	EXTRACELLULAR	0	0.26043	0	0.9881	0.56819	0.00113	0.06414	0.30203	0.04153	0.00233	0.00281	0.00294	0.00393	0.0082	0.00176	0.00099
Q93ZV8	AT1G10510	EMB2004	RNI-like superfamily protein	CHLOROPLAST	CHLOROPLAST	UNKNOWN	CHLOROPLAST	UNKNOWN	0	0	0	1	0.96987	0.00044	0.0105	0.00185	0.00186	0.00072	0.00127	0.00632	0.00217	0.00125	0.003	0.00075
A0A1P8APE6	AT1G10520	POL{LAMBDA}	DNA polymerase	NUCLEUS+cytosol?	UNKNOWN	UNKNOWN	NUCLEUS	UNKNOWN	0.00011	0.00011	0	0.7381	0.00337	0.10468	0.00384	0.0787	0.00399	0.00592	0.76415	0.00467	0.00757	0.00727	0.01089	0.00497
A0A1P8AP19	AT1G10540	NAT8	Nucleobase-ascorbate transporter 8	GOLGI+ER	UNKNOWN	UNKNOWN	GOLGI	ER	0	0.306	0	0.5	0.01138	0.00534	0.2743	0.00968	0.49478	0.00831	0.00504	0.07241	0.01479	0.01485	0.06238	0.02673
A4FVN8	AT1G10580	A4FVN8	Pre-mRNA-processing factor 17	NUCLEUS	UNKNOWN	UNKNOWN	NUCLEUS	UNKNOWN	0	0	0	1	0.00219	0.0021	0.00128	0.00995	0.00184	0.00225	0.97218	0.00222	0.00176	0.00137	0.00171	0.00115
Q93W05	AT1G10590	Q93W05	At1g10590/F20B24_1	?NUCLEUS+CYTOSOL+pm	UNKNOWN	UNKNOWN	UNKNOWN	UNKNOWN	0.30512	0.30512	0.00278	1	0.00299	0.23554	0.01162	0.0326	0.00347	0.0068	0.49858	0.00544	0.18101	0.00339	0.00822	0.01033
Q6ID97	AT1G10630	ARFA1F	ADP-ribosylation factor	PM+cytosol+extracellular?	UNKNOWN	UNKNOWN	PM	CYTOSOL	0	0.01435	0	0.9881	0.00319	0.18834	0.0141	0.1345	0.00272	0.0039	0.00854	0.00628	0.60894	0.00608	0.01079	0.0126
Q8H101	AT1G10660	Q8H101	AT1G10660 protein	PM	UNKNOWN	UNKNOWN	PM	UNKNOWN	0	0	0	0.96429	0.00337	0.00194	0.00509	0.00241	0.0088	0.00603	0.00157	0.00466	0.90619	0.0019	0.00568	0.05236
Q9SGY2	AT1G10670	ACLA-1	ATP-citrate synthase alpha chain protein 1	CYTOSOL	UNKNOWN	UNKNOWN	CYTOSOL	UNKNOWN	0	0	0	1	0.00209	0.95166	0.00093	0.00176	0.00073	0.00145	0.01415	0.002	0.00487	0.00121	0.00428	0.01488
Q93Z66	AT1G10700	PRS3	Ribose-phosphate pyrophosphokinase 3, chloroplastic	CHLOROPLAST	CHLOROPLAST	UNKNOWN	CHLOROPLAST	UNKNOWN	0	0	0	1	0.93882	0.00185	0.00111	0.00298	0.00084	0.00107	0.04606	0.00295	0.00104	0.00047	0.00199	0.00082
Q9SAC9	AT1G10730	AP1M1	AP-1 complex subunit mu-1	CYTOSOL	UNKNOWN	UNKNOWN	CYTOSOL	UNKNOWN	0	0	0	1	0.00273	0.88519	0.0016	0.05174	0.00176	0.00369	0.01168	0.00298	0.00585	0.0025	0.00878	0.0215
Q9SAC6	AT1G10760	GWD1	Alpha-glucan water dikinase 1, chloroplastic	CHLOROPLAST	CHLOROPLAST	PLASTID STROMA	CHLOROPLAST	UNKNOWN	0	0	0	1	0.98494	0.00181	0.00102	0.00216	0.0008	0.00085	0.00306	0.00103	0.00084	0.00049	0.002	0.00101
Q9SAC0	AT1G10830	Z-ISO	15-cis-zeta-carotene isomerase, chloroplastic	CHLOROPLAST	CHLOROPLAST	UNKNOWN	CHLOROPLAST	UNKNOWN	0	0	0	1	0.96201	0.00053	0.00299	0.00173	0.00273	0.00166	0.00186	0.02094	0.00128	0.00175	0.00167	0.00084
Q9C5Z2	AT1G10840	TIF3H1	Eukaryotic translation initiation factor 3 subunit H	?NUCLEUS+CYTOSOL+vacuole	UNKNOWN	UNKNOWN	UNKNOWN	UNKNOWN	0.3504	0.3504	0.00607	1	0.00227	0.25557	0.00125	0.0019	0.0019	0.00524	0.48256	0.00711	0.04833	0.00158	0.00437	0.18791
Q940B9	AT1G10850	Q940B9	Leucine-rich repeat protein kinase family protein	PM	UNKNOWN	UNKNOWN	PM	UNKNOWN	0	0	0	0.97619	0.00501	0.00147	0.00561	0.0039	0.00503	0.00163	0.00313	0.00158	0.96045	0.00353	0.00387	0.00479
B3H4R5	AT1G10865	B3H4R5	Cytochrome C oxidase assembly factor	MITOCHONDRION	UNKNOWN	UNKNOWN	MITOCHONDRION	UNKNOWN	0	0	0	0.88095	0.00138	0.00225	0.01111	0.00285	0.00132	0.94249	0.00174	0.00501	0.01823	0.00305	0.00508	0.00549
Q9SMX5	AT1G10870	AGD4	ADP-ribosylation factor GTPase-activating protein AGD4	CYTOSOL+peroxisome	UNKNOWN	UNKNOWN	CYTOSOL	PEROXISOME	0	0.03614	0	0.86905	0.0545	0.65181	0.00195	0.00612	0.00103	0.00318	0.02131	0.16412	0.02762	0.0024	0.01934	0.04664
Q9SUI2	AT1G10900	PIP5K7	Phosphatidylinositol 4-phosphate 5-kinase 7	PM	UNKNOWN	UNKNOWN	PM	UNKNOWN	0	0	0	1	0.00946	0.00444	0.0067	0.00478	0.00205	0.00148	0.00384	0.00242	0.92637	0.00497	0.02859	0.00489
A0A1P8AT99	AT1G10920	LOV1	Disease resistance protein RPP8-like protein 1	PM+unknown?	UNKNOWN	UNKNOWN	PM	UNKNOWN	0.00032	0.00032	0	0.5	0.0173	0.00598	0.01408	0.0108	0.00243	0.00287	0.08436	0.01022	0.70915	0.00991	0.12993	0.00297
Q940G0	AT1G10950	TMN1	Transmembrane 9 superfamily member 1	GOLGI	GOLGI	GOLGI CIS	GOLGI	UNKNOWN	0	0	0	1	0.00255	0.00107	0.08201	0.00708	0.87515	0.00315	0.00224	0.0015	0.00386	0.01471	0.00252	0.00417
O04089	AT1G10970	ZIP4	Zinc transporter 4, chloroplastic	PM+VACUOLE	UNKNOWN	UNKNOWN	PM	VACUOLE	0	0.37257	0	0.7381	0.00216	0.00658	0.0047	0.00401	0.00451	0.00367	0.00394	0.00253	0.59224	0.00352	0.01972	0.35241
Q3EDE7	AT1G10990	Q3EDE7	Transmembrane protein	CHLOROPLAST+ER	UNKNOWN	UNKNOWN	CHLOROPLAST	ER	0	0.00314	0	1	0.74639	0.00073	0.21453	0.00276	0.01039	0.00081	0.00131	0.00228	0.01131	0.00238	0.00566	0.00144
Q8GYT4	AT1G11020	Q8GYT4	RING/FYVE/PHD zinc finger superfamily protein	TGN	UNKNOWN	UNKNOWN	TGN	UNKNOWN	0	0	0	1	0.00086	0.00339	0.00427	0.00504	0.00601	0.0016	0.0034	0.00171	0.00204	0.96671	0.00296	0.00201
O04086	AT1G11050	O04086	Probable receptor-like protein kinase At1g11050	PM	PM	PM	PM	UNKNOWN	0	0	0	1	0.00177	0.00202	0.00534	0.00498	0.00248	0.00122	0.00349	0.00178	0.95959	0.00973	0.00248	0.00513
O04083	AT1G11090	MAGL1	Alpha/beta-Hydrolases superfamily protein	?ER+VACUOLE+golgi?+pm?	UNKNOWN	UNKNOWN	UNKNOWN	UNKNOWN	0.68334	0.68334	0.05134	1	0.00538	0.08912	0.3054	0.01835	0.12111	0.00859	0.0034	0.03257	0.10356	0.00591	0.03903	0.26756
Q8RWZ1	AT1G11130	SUB	Protein STRUBBELIG	PM+CHLOROPLAST	UNKNOWN	PM	PM	CHLOROPLAST	0	0.04684	0	1	0.27234	0.00215	0.00673	0.00409	0.00401	0.00268	0.00351	0.00503	0.68967	0.00148	0.00502	0.00327
A0A1P8ANB7	AT1G11180	SCAMP2	Secretory carrier-associated membrane protein	PM+TGN	UNKNOWN	UNKNOWN	PM	TGN	0	0.4894	0	0.86905	0.00206	0.00659	0.02641	0.02006	0.0078	0.0038	0.00383	0.00599	0.47168	0.42865	0.00349	0.01963
Q9SXA6	AT1G11190	ENDO1	Endonuclease 1	NUCLEUS	UNKNOWN	UNKNOWN	NUCLEUS	UNKNOWN	0	0	0	0.90476	0.00243	0.00075	0.00131	0.00174	0.00129	0.00233	0.98062	0.00405	0.00121	0.00158	0.00147	0.0012
F4I7E7	AT1G11200	F4I7E7	Organic solute transporter ostalpha protein	ER	UNKNOWN	UNKNOWN	ER	UNKNOWN	0	0	0	0.9881	0.00221	0.00182	0.91705	0.00389	0.01125	0.00174	0.00173	0.00117	0.02601	0.02256	0.00194	0.00863
Q9SXA7	AT1G11210	T28P6.13	At1g11210	?CYTOSOL+PM+unknown	UNKNOWN	UNKNOWN	UNKNOWN	UNKNOWN	0.64462	0.64462	0.08388	0.71429	0.00575	0.31214	0.06867	0.06372	0.01015	0.00404	0.03912	0.0035	0.27524	0.01854	0.19243	0.00671
Q8W494	AT1G11240	Q8W494	Ribosomal RNA-processing protein	NUCLEUS	UNKNOWN	UNKNOWN	NUCLEUS	UNKNOWN	0	0	0	0.86905	0.00327	0.00127	0.00182	0.02183	0.00482	0.00279	0.95537	0.00227	0.00183	0.00131	0.00244	0.00099
P23586	AT1G11260	STP1	Sugar transport protein 1	PM	PM	PM	PM	UNKNOWN	0	0	0	1	0.0033	0.00118	0.00913	0.00281	0.00594	0.00319	0.00245	0.00245	0.95895	0.00416	0.00275	0.0037
Q9SXB6	AT1G11310	MLO2	MLO-like protein 2	TGN+GOLGI	UNKNOWN	UNKNOWN	TGN	GOLGI	0	0.13742	0	1	0.00213	0.00306	0.08166	0.00445	0.28249	0.00394	0.00201	0.00318	0.01992	0.586	0.00333	0.00784
Q9SXB7	AT1G11320	Q9SXB7	GDSL esterase/lipase	CHLOROPLAST+PEROXISOME	UNKNOWN	UNKNOWN	CHLOROPLAST	PEROXISOME	0	0.01235	0	1	0.72767	0.00137	0.01004	0.00574	0.02482	0.00278	0.00875	0.20412	0.00288	0.00326	0.00712	0.00143
C0Z2J1	AT1G11360	C0Z2J1	AT1G11360 protein	CYTOSOL+PM	UNKNOWN	UNKNOWN	CYTOSOL	PM	0	0.49812	0	1	0.00181	0.47539	0.00356	0.00895	0.002	0.00343	0.00298	0.00297	0.46888	0.00413	0.00515	0.02075
Q8LFV5	AT1G11380	Q8LFV5	At1g11380	TGN	UNKNOWN	UNKNOWN	TGN	UNKNOWN	0	0	0	0.96429	0.00109	0.00145	0.00816	0.00375	0.00432	0.00141	0.00242	0.00284	0.00377	0.96508	0.00386	0.00185
F4I8V6	AT1G11390	F4I8V6	Protein kinase superfamily protein	MITOCHONDRION	UNKNOWN	UNKNOWN	MITOCHONDRION	UNKNOWN	0	0	0	1	0.00142	0.00106	0.00293	0.00252	0.0026	0.97839	0.00148	0.0026	0.00206	0.00139	0.00222	0.00135
Q9LPZ4	AT1G11400	PYM	Partner of Y14 and mago	CYTOSOL+NUCLEUS	UNKNOWN	UNKNOWN	CYTOSOL	NUCLEUS	0	0.00439	0	0.88095	0.00174	0.75729	0.00125	0.0032	0.00202	0.00338	0.20393	0.00581	0.00654	0.00227	0.00474	0.00782
Q9LPZ1	AT1G11430	MORF9	Multiple organellar RNA editing factor 9, chloroplastic	CHLOROPLAST	UNKNOWN	PLASTID STROMA	CHLOROPLAST	UNKNOWN	0	0	0	0.9881	0.97798	0.0007	0.00081	0.0016	0.00083	0.00208	0.01068	0.0027	0.00062	0.0004	0.00102	0.00059
Q8LFJ6	AT1G11475	NRPB10	DNA-directed RNA polymerases II, IV and V subunit 10	NUCLEUS	UNKNOWN	UNKNOWN	NUCLEUS	UNKNOWN	0	0	0	0.91667	0.00109	0.00638	0.0018	0.0023	0.00116	0.00149	0.96938	0.00182	0.00314	0.00278	0.00241	0.00624
A8MR62	AT1G11480	A8MR62	Eukaryotic translation initiation factor-like protein	?VACUOLE+CHLOROPLAST+unknown?+cytosol?	UNKNOWN	UNKNOWN	UNKNOWN	UNKNOWN	0.6303	0.6303	0.00217	0.91667	0.34089	0.12292	0.00496	0.00417	0.00378	0.00552	0.00424	0.00708	0.00755	0.00188	0.13426	0.36275
Q1JPL7	AT1G11580	PME18	Pectinesterase/pectinesterase inhibitor 18	EXTRACELLULAR+NUCLEUS	UNKNOWN	UNKNOWN	EXTRACELLULAR	NUCLEUS	0	0.40894	0	1	0.00579	0.00954	0.01119	0.53648	0.01004	0.00673	0.38956	0.00598	0.0087	0.00716	0.00566	0.00317
Q9SAB3	AT1G11650	RBP45B	Polyadenylate-binding protein RBP45B	NUCLEUS+CYTOSOL	UNKNOWN	UNKNOWN	NUCLEUS	CYTOSOL	0	0.26412	0	1	0.00157	0.34416	0.00157	0.00319	0.00187	0.00384	0.61485	0.00399	0.0078	0.00241	0.00588	0.00888
Q9SAB1	AT1G11660	HSP70-16	Heat shock 70 kDa protein 16	CYTOSOL+PM	UNKNOWN	UNKNOWN	CYTOSOL	PM	0	0.0589	0	1	0.00226	0.65752	0.00387	0.02237	0.00156	0.00306	0.0101	0.01144	0.26508	0.00362	0.01104	0.00808
Q9SAA9	AT1G11680	CYP51G1	Sterol 14-demethylase	ER	ER	ER	ER	UNKNOWN	0	0	0	1	0.00171	0.00127	0.96769	0.00397	0.00356	0.0018	0.00132	0.00149	0.00471	0.00742	0.00226	0.00281
F4IAG1	AT1G11720	SS3	starch synthase	CHLOROPLAST	UNKNOWN	PLASTID STROMA	CHLOROPLAST	UNKNOWN	0	0	0	1	0.95471	0.00102	0.00137	0.002	0.00108	0.00112	0.03196	0.00199	0.00094	0.0006	0.00245	0.00076
Q9SAA2	AT1G11750	CLPP6	ATP-dependent Clp protease proteolytic subunit 6, chloroplastic	CHLOROPLAST	CHLOROPLAST	PLASTID STROMA	CHLOROPLAST	UNKNOWN	0	0	0	1	0.98572	0.00035	0.00222	0.00137	0.00127	0.00095	0.00146	0.00309	0.00099	0.00069	0.00114	0.00075
Q8H0V2	AT1G11755	LEW1	ditrans,polycis-polyprenyl diphosphate synthase [(2E,6E)-farnesyldiphosphate specific]	ER+EXTRACELLULAR	UNKNOWN	UNKNOWN	ER	EXTRACELLULAR	0	0.05278	0	0.7619	0.00713	0.00524	0.71638	0.22596	0.00545	0.00332	0.00288	0.00481	0.00954	0.00947	0.00604	0.00377
Q84VW5	AT1G11760	MED32	Mediator of RNA polymerase II transcription subunit 32	NUCLEUS+peroxisome?+unknown?	UNKNOWN	UNKNOWN	NUCLEUS	UNKNOWN	0.00045	0.00045	0	0.7619	0.02393	0.00372	0.00286	0.00156	0.00134	0.0088	0.70087	0.12921	0.00435	0.00247	0.11559	0.0053
Q9SA98	AT1G11780	ALKBH1A	DNA N(6)-methyladenine demethylase ALKBH1A	CYTOSOL+peroxisome	UNKNOWN	UNKNOWN	CYTOSOL	PEROXISOME	0	0.03742	0	0.5	0.00193	0.65304	0.0023	0.01403	0.00166	0.09079	0.00465	0.18439	0.00407	0.00404	0.01561	0.02349
Q9SA96	AT1G11790	ADT1	Arogenate dehydratase/prephenate dehydratase 1, chloroplastic	CHLOROPLAST	CHLOROPLAST	PLASTID STROMA	CHLOROPLAST	UNKNOWN	0	0	0	0.9881	0.97245	0.00124	0.00135	0.00212	0.00065	0.0006	0.00859	0.00582	0.00115	0.00099	0.00409	0.00096
Q9SA95	AT1G11800	Q9SA95	At1g11800/F25C20_3	?CHLOROPLAST+UNKNOWN+cytosol?	UNKNOWN	UNKNOWN	UNKNOWN	UNKNOWN	0.51617	0.51617	0.01983	1	0.42657	0.10288	0.00336	0.00435	0.00174	0.00462	0.03367	0.00578	0.00717	0.00179	0.40067	0.00739
O65399	AT1G11820	O65399	Glucan endo-1,3-beta-glucosidase 1	PM	UNKNOWN	UNKNOWN	PM	UNKNOWN	0	0	0	0.7619	0.00311	0.00204	0.03605	0.00576	0.00194	0.00513	0.00285	0.02973	0.88839	0.00303	0.0084	0.01357
O65398	AT1G11840	GLX1	Lactoylglutathione lyase GLX1	CYTOSOL	UNKNOWN	UNKNOWN	CYTOSOL	UNKNOWN	0	0	0	1	0.00248	0.96414	0.00173	0.00958	0.00184	0.00198	0.00321	0.00213	0.00289	0.00245	0.00349	0.00407
A0A2H1ZEA9	AT1G11860	A0A2H1ZEA9	Aminomethyltransferase	MITOCHONDRION	UNKNOWN	UNKNOWN	MITOCHONDRION	UNKNOWN	0	0	0	1	0.00317	0.00189	0.00164	0.00168	0.00134	0.98097	0.00123	0.0021	0.00171	0.0013	0.00143	0.00154
Q8RWT8	AT1G11870	OVA7	Serine--tRNA ligase, chloroplastic/mitochondrial	CHLOROPLAST+MITOCHONDRION	UNKNOWN	UNKNOWN	CHLOROPLAST	MITOCHONDRION	0	0.25882	0	1	0.60691	0.00312	0.00433	0.00408	0.0036	0.35102	0.00342	0.01266	0.00225	0.00168	0.00404	0.0029
Q6NKT6	AT1G11880	Q6NKT6	GPI mannosyltransferase 2	ER	UNKNOWN	UNKNOWN	ER	UNKNOWN	0	0	0	0.9881	0.00309	0.00178	0.92328	0.00411	0.0383	0.00217	0.00194	0.00101	0.00705	0.00952	0.00276	0.00499
Q94AU2	AT1G11890	SEC221	25.3 kDa vesicle transport protein SEC22-1	ER+pm+extracellular?	ER	ER	ER	PM	0	0.03339	0	1	0.00577	0.04143	0.61566	0.10363	0.00896	0.00521	0.01689	0.00594	0.1741	0.00452	0.00735	0.01053
Q8L702	AT1G11905	Q8L702	Endoplasmic reticulum transmembrane protein	ER	ER	ER	ER	UNKNOWN	0	0	0	1	0.0031	0.00179	0.95669	0.00206	0.00659	0.00151	0.00262	0.00198	0.01303	0.00435	0.00286	0.00343
A0A1P8AV08	AT1G11910	APA1	Aspartic proteinase A1	EXTRACELLULAR	UNKNOWN	UNKNOWN	EXTRACELLULAR	UNKNOWN	0	0	0	1	0.00934	0.02302	0.00777	0.90781	0.00523	0.00328	0.00171	0.01341	0.0082	0.00542	0.00859	0.0062
Q944L8	AT1G11930	Q944L8	Pyridoxal phosphate homeostasis protein	CYTOSOL+chloroplast?	UNKNOWN	UNKNOWN	CYTOSOL	CHLOROPLAST	0	0.00844	0	1	0.14466	0.71363	0.0033	0.06326	0.00278	0.01642	0.00292	0.03128	0.00527	0.00269	0.00964	0.00415
Q8GYH0	AT1G11940	Q8GYH0	Core-2/I-branching beta-1,6-N-acetylglucosaminyltransferase family protein	GOLGI	GOLGI	UNKNOWN	GOLGI	UNKNOWN	0	0	0	1	0.00165	0.00154	0.00407	0.01114	0.96557	0.00106	0.00419	0.00136	0.00154	0.00345	0.003	0.00143
B5TYT3	AT1G11960	OSCA1.3	Hyperosmolality-gated Ca2+ permeable channel 1.3	PM	PM	PM	PM	UNKNOWN	0	0	0	1	0.00378	0.00129	0.03994	0.00517	0.01664	0.00481	0.00264	0.00255	0.91114	0.00645	0.0023	0.00329
Q8W4M5	AT1G12000	PFP-BETA1	Pyrophosphate--fructose 6-phosphate 1-phosphotransferase subunit beta 1	CYTOSOL+nucleus	UNKNOWN	UNKNOWN	CYTOSOL	UNKNOWN	0.00056	0.00056	0	1	0.00184	0.77715	0.00125	0.00551	0.00204	0.00393	0.18363	0.00572	0.00514	0.00276	0.00463	0.0064
O65378	AT1G12010	O65378	1-aminocyclopropane-1-carboxylate oxidase 3	PM	UNKNOWN	UNKNOWN	PM	UNKNOWN	0	0	0	0.61905	0.00593	0.01322	0.00392	0.00478	0.00411	0.00183	0.00751	0.00169	0.9228	0.01098	0.0182	0.00501
Q8RW90	AT1G12050	FAH	Fumarylacetoacetase	CYTOSOL	CYTOSOL	CYTOSOL	CYTOSOL	UNKNOWN	0	0	0	1	0.00252	0.94574	0.00241	0.02191	0.00431	0.00243	0.00269	0.00251	0.00328	0.00315	0.00566	0.00338
Q05085	AT1G12110	NPF6.3	Protein NRT1/ PTR FAMILY 6.3	?ER+PM+EXTRACELLULAR	UNKNOWN	UNKNOWN	UNKNOWN	UNKNOWN	0.63846	0.63846	0.10202	0.84524	0.00418	0.01028	0.39734	0.23668	0.00604	0.00452	0.00414	0.01325	0.24952	0.02801	0.00386	0.04217
A8MRX0	AT1G12140	FMOGS-OX5	Flavin-containing monooxygenase FMO GS-OX5	CYTOSOL	UNKNOWN	UNKNOWN	CYTOSOL	UNKNOWN	0	0	0	1	0.00374	0.93104	0.00131	0.026	0.00206	0.00339	0.01433	0.00367	0.00333	0.00213	0.0049	0.0041
Q9FWW6	AT1G12160	Q9FWW6	Flavin-containing monooxygenase FMO GS-OX-like 1	UNKNOWN+CYTOSOL	UNKNOWN	UNKNOWN	UNKNOWN	CYTOSOL	0	0.46364	0	0.75	0.00251	0.37705	0.00248	0.00618	0.00307	0.00376	0.0441	0.00381	0.01328	0.03631	0.46616	0.04129
Q9FWW9	AT1G12200	Q9FWW9	Flavin-containing monooxygenase FMO GS-OX-like 2	CYTOSOL+PM	UNKNOWN	UNKNOWN	CYTOSOL	PM	0	0.02441	0	0.75	0.0016	0.75221	0.00335	0.00372	0.00315	0.00354	0.00661	0.00272	0.2014	0.00938	0.00531	0.00701
F4IC59	AT1G12230	F4IC59	transaldolase	CHLOROPLAST	CHLOROPLAST	PLASTID STROMA	CHLOROPLAST	UNKNOWN	0	0	0	1	0.98371	0.00109	0.00095	0.00137	0.00059	0.00105	0.00456	0.00264	0.00074	0.00038	0.00216	0.00077
F4IC62	AT1G12244	F4IC62	Polynucleotidyl transferase, ribonuclease H-like superfamily protein	ER	UNKNOWN	UNKNOWN	ER	UNKNOWN	0	0	0	0.9881	0.00576	0.00172	0.89739	0.003	0.06292	0.0023	0.00369	0.00151	0.00746	0.00625	0.00429	0.00372
Q9LNB6	AT1G12270	HOP1	Hsp70-Hsp90 organizing protein 1	CYTOSOL+nucleus?	UNKNOWN	UNKNOWN	CYTOSOL	UNKNOWN	7e-05	7e-05	0	1	0.00152	0.82244	0.0013	0.00313	0.00169	0.00293	0.13741	0.00479	0.01196	0.00303	0.00455	0.00525
P60838	AT1G12280	SUMM2	Disease resistance protein SUMM2	UNKNOWN+pm?	UNKNOWN	UNKNOWN	UNKNOWN	UNKNOWN	1e-05	1e-05	0	0.88095	0.00501	0.05129	0.05376	0.06306	0.00588	0.00399	0.01246	0.00706	0.108	0.01218	0.66195	0.01536
Q0WKV3	AT1G12300	Q0WKV3	Pentatricopeptide repeat-containing protein At1g12300, mitochondrial	MITOCHONDRION	UNKNOWN	UNKNOWN	MITOCHONDRION	UNKNOWN	0	0	0	0.61905	0.0036	0.00115	0.00158	0.00348	0.00151	0.97678	0.00437	0.00157	0.00136	0.00135	0.00177	0.00149
Q94AZ4	AT1G12310	CML13	Probable calcium-binding protein CML13	CYTOSOL+PM	UNKNOWN	UNKNOWN	CYTOSOL	PM	0	0.12419	0	1	0.0021	0.64182	0.01099	0.01863	0.0023	0.00448	0.00558	0.00437	0.29104	0.00943	0.00392	0.00534
Q8GXR5	AT1G12350	PPCS1	Phosphopantothenate--cysteine ligase 1	CYTOSOL	UNKNOWN	UNKNOWN	CYTOSOL	UNKNOWN	0	0	0	1	0.00076	0.95953	0.00239	0.00395	0.00217	0.00147	0.00824	0.00158	0.00683	0.00311	0.00306	0.00691
Q9C5X3	AT1G12360	KEU	SNARE-interacting protein KEULE	PM+NUCLEUS	UNKNOWN	UNKNOWN	PM	NUCLEUS	0	0.18747	0	1	0.00397	0.01978	0.00265	0.00673	0.00219	0.0038	0.31191	0.00639	0.61721	0.00199	0.00504	0.01834
F4IC79	AT1G12380	F4IC79	Uncharacterized protein	NUCLEUS	UNKNOWN	UNKNOWN	NUCLEUS	UNKNOWN	0	0	0	0.79762	0.00416	0.00112	0.00116	0.00347	0.00239	0.02148	0.91849	0.03314	0.00109	0.00086	0.01189	0.00075
Q9XJ36	AT1G12410	CLPR2	ATP-dependent Clp protease proteolytic subunit-related protein 2, chloroplastic	CHLOROPLAST	CHLOROPLAST	PLASTID STROMA	CHLOROPLAST	UNKNOWN	0	0	0	1	0.98349	0.00069	0.00114	0.00141	0.0007	0.00114	0.00328	0.00455	0.00079	0.00047	0.00167	0.00067
Q9FZ06	AT1G12430	KINUA	Kinesin-like protein KIN-UA	?CYTOSOL+EXTRACELLULAR+pm	UNKNOWN	UNKNOWN	UNKNOWN	UNKNOWN	0.64089	0.64089	0.046	0.61905	0.01381	0.33082	0.00833	0.27557	0.00175	0.00333	0.01625	0.08817	0.18393	0.00483	0.04048	0.03272
F4IDS7	AT1G12470	VPS18	Vacuolar sorting protein 18	VACUOLE+cytosol	UNKNOWN	UNKNOWN	VACUOLE	UNKNOWN	0	0	0	1	0.001	0.15167	0.00146	0.00574	0.00165	0.00263	0.02992	0.00217	0.01271	0.0016	0.0035	0.78596
Q9LDH3	AT1G12500	Q9LDH3	Probable sugar phosphate/phosphate translocator At1g12500	GOLGI	UNKNOWN	UNKNOWN	GOLGI	UNKNOWN	0	0	0	0.86905	0.00204	0.00102	0.01247	0.00358	0.94337	0.00172	0.01753	0.00232	0.00195	0.00497	0.00703	0.002
Q9LD47	AT1G12520	CCS	Copper chaperone for superoxide dismutase, chloroplastic/cytosolic	CHLOROPLAST+extracellular?	UNKNOWN	PLASTID STROMA	CHLOROPLAST	UNKNOWN	1e-05	1e-05	0	0.9881	0.79941	0.02181	0.00328	0.14358	0.00392	0.00229	0.01245	0.00215	0.00304	0.0018	0.00456	0.0017
Q9LE33	AT1G12550	HPR3	Glyoxylate/hydroxypyruvate reductase HPR3	CYTOSOL+unknown?	UNKNOWN	UNKNOWN	CYTOSOL	UNKNOWN	6e-05	6e-05	0	0.75	0.00158	0.77224	0.00195	0.0064	0.002	0.0034	0.0194	0.0023	0.01147	0.00225	0.11478	0.06223
F4IDU4	AT1G12640	LPCAT1	Lysophospholipid acyltransferase 1	ER	ER	ER	ER	UNKNOWN	0	0	0	1	0.00198	0.0013	0.96494	0.00318	0.00695	0.00164	0.00157	0.00124	0.00493	0.00746	0.00178	0.00304
Q8W1E4	AT1G12650	Q8W1E4	rRNA biogenesis protein RRP36	NUCLEUS	UNKNOWN	UNKNOWN	NUCLEUS	UNKNOWN	0	0	0	0.61905	0.00186	0.00141	0.00139	0.00087	0.00106	0.00148	0.98082	0.00165	0.0016	0.00168	0.00377	0.00238
Q9LN71	AT1G12760	Q9LN71	E3 ubiquitin-protein ligase At1g12760	PM+VACUOLE	UNKNOWN	UNKNOWN	PM	VACUOLE	0	0.23541	0	0.86905	0.00217	0.00443	0.01553	0.01021	0.00616	0.00388	0.00341	0.00309	0.5974	0.02557	0.0026	0.32554
Q8W4E1	AT1G12770	RH47	DEAD-box ATP-dependent RNA helicase 47, mitochondrial	MITOCHONDRION+chloroplast?	UNKNOWN	UNKNOWN	MITOCHONDRION	UNKNOWN	0	0	0	1	0.10588	0.00266	0.00332	0.00299	0.0027	0.84	0.00926	0.01889	0.00203	0.00135	0.00912	0.00182
Q9LPX2	AT1G12775	Q9LPX2	Pentatricopeptide repeat-containing protein At1g12775, mitochondrial	MITOCHONDRION	UNKNOWN	UNKNOWN	MITOCHONDRION	UNKNOWN	0	0	0	1	0.00446	0.00183	0.0013	0.00184	0.0012	0.97739	0.00262	0.0032	0.00142	0.00084	0.00219	0.00171
Q42605	AT1G12780	UGE1	Bifunctional UDP-glucose 4-epimerase and UDP-xylose 4-epimerase 1	CYTOSOL+pm?	CYTOSOL	CYTOSOL	CYTOSOL	UNKNOWN	0	0	0	1	0.00114	0.847	0.00626	0.00411	0.00156	0.00287	0.00222	0.00217	0.10605	0.01044	0.00305	0.01314
Q94AJ9	AT1G12800	SDP	Nucleic acid-binding, OB-fold-like protein	CHLOROPLAST	CHLOROPLAST	PLASTID STROMA	CHLOROPLAST	UNKNOWN	0	0	0	1	0.98353	0.00066	0.00125	0.00158	0.00081	0.0008	0.00524	0.00234	0.00084	0.00066	0.00158	0.00073
Q9LPW7	AT1G12820	AFB3	Protein AUXIN SIGNALING F-BOX 3	CYTOSOL	UNKNOWN	UNKNOWN	CYTOSOL	UNKNOWN	0	0	0	1	0.00393	0.94573	0.00124	0.01982	0.002	0.00324	0.00737	0.00341	0.00286	0.00205	0.00497	0.00337
Q9SDS7	AT1G12840	VHA-C	V-type proton ATPase subunit C	VACUOLE	UNKNOWN	UNKNOWN	VACUOLE	UNKNOWN	0	0	0	1	0.00105	0.02306	0.00532	0.01259	0.00279	0.00174	0.00365	0.00183	0.01436	0.00487	0.00346	0.92527
Q94BZ6	AT1G12850	Q94BZ6	At1g12850/F13K23_8	NUCLEUS+PM	UNKNOWN	UNKNOWN	NUCLEUS	PM	0	0.50201	0	0.86905	0.00497	0.01372	0.00448	0.00577	0.002	0.00399	0.46217	0.02161	0.46202	0.00304	0.00674	0.00949
A0A1P8APR6	AT1G12900	GAPA-2	Glyceraldehyde-3-phosphate dehydrogenase	CHLOROPLAST	CHLOROPLAST	PLASTID STROMA	CHLOROPLAST	UNKNOWN	0	0	0	1	0.98062	0.00499	0.00107	0.00261	0.00075	0.00103	0.00166	0.0015	0.00113	0.00052	0.00273	0.0014
Q9LPV9	AT1G12910	LWD1	WD repeat-containing protein LWD1	NUCLEUS	UNKNOWN	UNKNOWN	NUCLEUS	UNKNOWN	0	0	0	1	0.00123	0.03702	0.00111	0.0013	0.00093	0.00155	0.93954	0.00272	0.00348	0.0013	0.00523	0.00457
Q9LPV8	AT1G12920	ERF1-2	Eukaryotic peptide chain release factor subunit 1-2	CYTOSOL+NUCLEUS	UNKNOWN	UNKNOWN	CYTOSOL	NUCLEUS	0	0.42495	0	1	0.00136	0.54563	0.00153	0.00312	0.00204	0.004	0.40094	0.0039	0.0117	0.00287	0.00363	0.01929
F4HNZ9	AT1G12930	F4HNZ9	ARM repeat superfamily protein	CYTOSOL	UNKNOWN	UNKNOWN	CYTOSOL	UNKNOWN	0	0	0	1	0.00233	0.88418	0.01381	0.03491	0.01326	0.00217	0.00431	0.00327	0.02117	0.00453	0.01071	0.00536
Q9LPV4	AT1G12950	DTX31	Protein DETOXIFICATION 31	VACUOLE	UNKNOWN	UNKNOWN	VACUOLE	UNKNOWN	0	0	0	0.61905	0.00162	0.0434	0.0023	0.01905	0.00224	0.00507	0.00805	0.00812	0.00673	0.00132	0.00684	0.89526
Q8W4Q3	AT1G12970	PIRL3	Plant intracellular Ras-group-related LRR protein 3	CYTOSOL	UNKNOWN	UNKNOWN	CYTOSOL	UNKNOWN	0	0	0	1	0.00221	0.90016	0.01607	0.01151	0.00274	0.00322	0.00287	0.00612	0.02739	0.00399	0.01733	0.00638
Q8VYF6	AT1G13000	AT1G13000.1	Transmembrane protein, putative	GOLGI	GOLGI	GOLGI TRANS	GOLGI	UNKNOWN	0	0	0	1	0.00095	0.00241	0.00317	0.0052	0.97379	0.00145	0.00188	0.00108	0.00175	0.00333	0.0031	0.00188
Q9SAD7	AT1G13020	EIF4B2	Eukaryotic translation initiation factor 4B2	?PM+NUCLEUS+vacuole+cytosol?	UNKNOWN	UNKNOWN	UNKNOWN	UNKNOWN	0.6833	0.6833	0.11359	1	0.00279	0.14431	0.00139	0.00409	0.0027	0.00623	0.31654	0.00886	0.31802	0.00159	0.00885	0.18463
Q8RWK8	AT1G13030	COIL	Coilin	NUCLEUS	UNKNOWN	UNKNOWN	NUCLEUS	UNKNOWN	0	0	0	1	0.00172	0.0012	0.00096	0.00106	0.00111	0.00157	0.9857	0.00224	0.00107	0.00103	0.00111	0.00122
O23717	AT1G13060	PBE1	Proteasome subunit beta type-5-A	CYTOSOL	UNKNOWN	UNKNOWN	CYTOSOL	UNKNOWN	0	0	0	1	0.00134	0.94252	0.00083	0.00391	0.00128	0.0021	0.02851	0.00178	0.00373	0.00196	0.00266	0.00939
Q9SAE3	AT1G13090	CYP71B28	Cytochrome P450 71B28	ER	ER	ER	ER	UNKNOWN	0	0	0	1	0.00237	0.00106	0.95813	0.003	0.00913	0.00125	0.00286	0.00132	0.00701	0.00935	0.00223	0.00231
Q0WVH7	AT1G13160	Q0WVH7	Protein SDA1	NUCLEUS	UNKNOWN	UNKNOWN	NUCLEUS	UNKNOWN	0	0	0	1	0.00231	0.00342	0.00387	0.03367	0.00331	0.00209	0.93211	0.00352	0.00329	0.00239	0.00828	0.00173
Q9SAF0	AT1G13170	ORP1D	Oxysterol-binding protein-related protein 1D	CYTOSOL	UNKNOWN	UNKNOWN	CYTOSOL	UNKNOWN	0	0	0	1	0.00112	0.86603	0.00241	0.05348	0.00173	0.00363	0.01185	0.00524	0.01378	0.00283	0.00665	0.03124
Q9SAF1	AT1G13180	ARP3	Actin-related protein 3	CYTOSOL+PM	UNKNOWN	UNKNOWN	CYTOSOL	PM	0	0.36956	0	1	0.00167	0.4898	0.00518	0.09041	0.00235	0.00599	0.02544	0.0086	0.293	0.0038	0.014	0.05976
Q9SAF2	AT1G13190	Q9SAF2	F3F19.21 protein	NUCLEUS	UNKNOWN	UNKNOWN	NUCLEUS	UNKNOWN	0	0	0	0.70238	0.00172	0.0008	0.00225	0.00224	0.00248	0.00158	0.98058	0.0023	0.00144	0.00209	0.0015	0.00103
Q9SAF5	AT1G13210	ALA11	Probable phospholipid-transporting ATPase 11	PM	UNKNOWN	UNKNOWN	PM	UNKNOWN	0	0	0	1	0.01242	0.00172	0.00488	0.00311	0.0027	0.00377	0.00305	0.00774	0.94778	0.00296	0.00739	0.00249
A0A1P8AUZ9	AT1G13220	LINC2	Nuclear matrix constituent protein-like protein	NUCLEUS	UNKNOWN	UNKNOWN	NUCLEUS	UNKNOWN	0	0	0	1	0.00169	0.00132	0.00105	0.00117	0.00121	0.00133	0.98557	0.00191	0.00112	0.00127	0.00138	0.00096
Q9FV52	AT1G13270	MAP1B	Methionine aminopeptidase 1B, chloroplastic	CHLOROPLAST	CHLOROPLAST	UNKNOWN	CHLOROPLAST	UNKNOWN	0	0	0	1	0.89277	0.00174	0.00144	0.00191	0.00091	0.00154	0.0851	0.00816	0.0016	0.00072	0.00271	0.00138
Q93ZC5	AT1G13280	AOC4	Allene oxide cyclase 4, chloroplastic	CHLOROPLAST	UNKNOWN	PLASTID STROMA	CHLOROPLAST	UNKNOWN	0	0	0	1	0.97779	0.00041	0.00268	0.00111	0.00121	0.00269	0.0014	0.00855	0.00103	0.00096	0.00137	0.00081
Q38951	AT1G13320	PP2AA3	Serine/threonine-protein phosphatase 2A 65 kDa regulatory subunit A gamma isoform	CYTOSOL+PM	UNKNOWN	UNKNOWN	CYTOSOL	PM	0	0.42898	0	1	0.00125	0.50064	0.00325	0.01111	0.0016	0.00358	0.00398	0.00297	0.39409	0.0044	0.00312	0.07
Q9FX64	AT1G13330	HOP2	Homologous-pairing protein 2 homolog	NUCLEUS	UNKNOWN	UNKNOWN	NUCLEUS	UNKNOWN	0	0	0	1	0.00146	0.00131	0.00135	0.00137	0.00142	0.00111	0.98479	0.00162	0.00129	0.00128	0.00172	0.00129
Q9FX60	AT1G13370	Q9FX60	Histone H3-like 1	NUCLEUS	UNKNOWN	UNKNOWN	NUCLEUS	UNKNOWN	0	0	0	0.63095	0.00223	0.00092	0.00145	0.00231	0.00299	0.01021	0.95404	0.01582	0.00088	0.00084	0.0075	0.00081
Q9FX59	AT1G13380	Q9FX59	Expressed protein	TGN	UNKNOWN	UNKNOWN	TGN	UNKNOWN	0	0	0	1	0.00101	0.00879	0.02054	0.00362	0.00978	0.00183	0.00189	0.00266	0.04475	0.89061	0.00436	0.01016
Q0WVP2	AT1G13410	Q0WVP2	Tetratricopeptide repeat	MITOCHONDRION+extracellular	UNKNOWN	UNKNOWN	MITOCHONDRION	UNKNOWN	0.00079	0.00079	0	0.5119	0.00167	0.02537	0.00154	0.17497	0.00369	0.75511	0.01596	0.00808	0.00343	0.00176	0.00686	0.00157
Q9FX54	AT1G13440	GAPC2	Glyceraldehyde-3-phosphate dehydrogenase GAPC2, cytosolic	CYTOSOL	UNKNOWN	UNKNOWN	CYTOSOL	UNKNOWN	0	0	0	1	0.00073	0.88267	0.00239	0.00465	0.00134	0.00271	0.00391	0.00131	0.00651	0.00237	0.0074	0.08403
Q9FX53	AT1G13450	GT-1	Trihelix transcription factor GT-1	UNKNOWN+chloroplast+nucleus?	UNKNOWN	UNKNOWN	UNKNOWN	CHLOROPLAST	0	0.14337	0	0.7381	0.18825	0.00358	0.01889	0.01851	0.0492	0.00192	0.12215	0.00356	0.00335	0.00443	0.58533	0.00084
Q8LF36	AT1G13460	B'THETA	Serine/threonine protein phosphatase 2A 57 kDa regulatory subunit B' theta isoform	PM+unknown	UNKNOWN	UNKNOWN	PM	UNKNOWN	8e-05	8e-05	0	0.5	0.07176	0.00761	0.00379	0.00482	0.0034	0.00321	0.00868	0.00495	0.72381	0.00346	0.15055	0.01396
O82567	AT1G13560	AAPT1	Choline/ethanolaminephosphotransferase 1	ER	UNKNOWN	UNKNOWN	ER	UNKNOWN	0	0	0	0.86905	0.00392	0.01264	0.82668	0.0046	0.06219	0.00421	0.00248	0.00109	0.03056	0.00948	0.01485	0.02731
Q6NQI8	AT1G13580	LOH3	Ceramide synthase 1 LOH3	ER	UNKNOWN	UNKNOWN	ER	UNKNOWN	3e-05	3e-05	0	0.75	0.0043	0.00256	0.76598	0.09609	0.09201	0.00773	0.00195	0.00202	0.00595	0.01176	0.00314	0.0065
Q0WRA3	AT1G13690	ATE1	ATPase E1	NUCLEUS	UNKNOWN	UNKNOWN	NUCLEUS	UNKNOWN	0	0	0	1	0.00207	0.00417	0.00166	0.01516	0.00185	0.00205	0.96174	0.00292	0.00252	0.00187	0.00231	0.00168
Q9LMX6	AT1G13730	Q9LMX6	At1g13730	CYTOSOL+UNKNOWN	UNKNOWN	UNKNOWN	CYTOSOL	UNKNOWN	0	0.46372	0	0.84524	0.00119	0.43723	0.00504	0.01039	0.02802	0.00327	0.02435	0.00224	0.04051	0.00808	0.40674	0.03293
Q9LMX4	AT1G13750	PAP1	Probable inactive purple acid phosphatase 1	EXTRACELLULAR	UNKNOWN	EXTRACELLULAR	EXTRACELLULAR	UNKNOWN	0	0	0	1	0.00597	0.0059	0.00396	0.79727	0.00307	0.02183	0.01563	0.07971	0.0047	0.00396	0.05574	0.00226
Q8GYW9	AT1G13860	Q8GYW9	Probable methyltransferase PMT4	GOLGI	UNKNOWN	UNKNOWN	GOLGI	UNKNOWN	0	0	0	1	0.00165	0.00232	0.00363	0.03199	0.932	0.00168	0.01483	0.00195	0.00151	0.00365	0.00357	0.00122
Q9LMH0	AT1G13870	KTI12	Protein KTI12 homolog	CHLOROPLAST+CYTOSOL	UNKNOWN	UNKNOWN	CHLOROPLAST	CYTOSOL	0	0.48588	0	0.5	0.46439	0.39095	0.00375	0.00943	0.00346	0.00402	0.0064	0.00245	0.00536	0.00197	0.08779	0.02004
Q9LMG7	AT1G13900	PAP2	Probable inactive purple acid phosphatase 2	TGN	UNKNOWN	UNKNOWN	TGN	UNKNOWN	0	0	0	1	0.00148	0.00848	0.00563	0.08845	0.00909	0.00244	0.00707	0.00395	0.00243	0.86497	0.00488	0.00113
Q9XI91	AT1G13950	ELF5A-1	Eukaryotic translation initiation factor 5A-1	?UNKNOWN+cytosol+extracellular?	UNKNOWN	UNKNOWN	UNKNOWN	UNKNOWN	0.26537	0.26537	0.00116	0.63095	0.05697	0.19897	0.00389	0.14455	0.00384	0.02174	0.01877	0.0071	0.00556	0.00367	0.53039	0.00454
Q42510	AT1G13980	GN	ARF guanine-nucleotide exchange factor GNOM	CYTOSOL+PM	UNKNOWN	UNKNOWN	CYTOSOL	PM	0	0.20203	0	1	0.00186	0.61499	0.00307	0.0267	0.00168	0.00362	0.01684	0.00839	0.29169	0.0027	0.00851	0.01997
Q9XI87	AT1G14000	VIK	Serine/threonine-protein kinase VIK	CYTOSOL+pm	UNKNOWN	UNKNOWN	CYTOSOL	PM	0	0.00482	0	1	0.00173	0.71112	0.00553	0.0324	0.00362	0.00459	0.02152	0.00523	0.16579	0.03412	0.00289	0.01147
Q8GYG1	AT1G14010	Q8GYG1	Transmembrane emp24 domain-containing protein p24delta7	ER	ER	ER	ER	UNKNOWN	0	0	0	1	0.00329	0.00471	0.84677	0.00865	0.08911	0.0033	0.00205	0.00137	0.00887	0.01482	0.00369	0.01336
Q9XI82	AT1G14060	F7A19.14	F7A19.14 protein	MITOCHONDRION	UNKNOWN	UNKNOWN	MITOCHONDRION	UNKNOWN	0	0	0	1	0.00104	0.0007	0.00602	0.00279	0.00698	0.97292	0.00117	0.00176	0.00164	0.00279	0.00112	0.00107
Q9XI75	AT1G14130	DAO1	2-oxoglutarate-dependent dioxygenase DAO	CYTOSOL	UNKNOWN	UNKNOWN	CYTOSOL	UNKNOWN	0	0	0	0.61905	0.02026	0.80623	0.01	0.01324	0.00267	0.00245	0.00144	0.00392	0.03073	0.0047	0.06998	0.03438
Q9XI74	AT1G14140	PUMP3	Mitochondrial uncoupling protein 3	MITOCHONDRION	UNKNOWN	UNKNOWN	MITOCHONDRION	UNKNOWN	0	0	0	1	0.00153	0.01995	0.00114	0.01153	0.00136	0.94242	0.00442	0.0021	0.00223	0.0011	0.00866	0.00355
Q84MA6	AT1G14170	Q84MA6	At1g14170	CHLOROPLAST	UNKNOWN	UNKNOWN	CHLOROPLAST	UNKNOWN	0	0	0	0.7381	0.89739	0.01998	0.00197	0.00283	0.00105	0.04698	0.00317	0.01152	0.00161	0.00076	0.00639	0.00634
F4HUG9	AT1G14210	F4HUG9	Ribonuclease T2 family protein	EXTRACELLULAR+cytosol	UNKNOWN	EXTRACELLULAR	EXTRACELLULAR	UNKNOWN	5e-05	5e-05	0	1	0.00348	0.15064	0.00339	0.78827	0.00579	0.00707	0.00714	0.00719	0.00898	0.00504	0.00688	0.00613
Q8H1D8	AT1G14230	APY4	Probable apyrase 4	ER	UNKNOWN	UNKNOWN	ER	UNKNOWN	0	0	0	0.7381	0.01638	0.00101	0.92211	0.00219	0.01908	0.00145	0.00177	0.00106	0.01986	0.00588	0.00606	0.00315
Q9M9T2	AT1G14300	Q9M9T2	Protein HGH1 homolog	CYTOSOL	UNKNOWN	UNKNOWN	CYTOSOL	UNKNOWN	0	0	0	1	0.01907	0.82499	0.00416	0.03569	0.00283	0.00314	0.00417	0.04498	0.00747	0.00351	0.04609	0.0039
Q9M9T1	AT1G14310	Q9M9T1	F14L17.7 protein	MITOCHONDRION+CHLOROPLAST	UNKNOWN	UNKNOWN	MITOCHONDRION	CHLOROPLAST	0	0.35355	0	1	0.36093	0.01632	0.00392	0.02811	0.00379	0.55655	0.00493	0.0084	0.00288	0.00166	0.01089	0.00163
Q93VT9	AT1G14320	RPL10A	Large ribosomal subunit protein uL16z	CYTOSOL	UNKNOWN	RIBOSOMAL	CYTOSOL	UNKNOWN	0	0	0	0.86905	0.00076	0.87494	0.00217	0.00587	0.00213	0.00184	0.00861	0.00163	0.02528	0.00172	0.00506	0.06999
Q949S4	AT1G14340	BPL3	RNA-binding	CHLOROPLAST+pm+er?	UNKNOWN	UNKNOWN	CHLOROPLAST	PM	4e-05	0.03776	4e-05	0.60714	0.60292	0.00211	0.11407	0.00311	0.01321	0.00263	0.00384	0.00265	0.18386	0.00413	0.06485	0.00263
Q949S6	AT1G14345	Q949S6	NAD(P)-linked oxidoreductase superfamily protein	CHLOROPLAST+extracellular?	UNKNOWN	PLASTID MEMBRANE	CHLOROPLAST	UNKNOWN	0	0	0	1	0.84663	0.0083	0.0023	0.11651	0.00258	0.00214	0.01017	0.00283	0.00201	0.00097	0.00463	0.00092
Q9M9S6	AT1G14360	UTR3	UDP-galactose/UDP-glucose transporter 3	EXTRACELLULAR	UNKNOWN	UNKNOWN	EXTRACELLULAR	UNKNOWN	0	0	0	0.72619	0.00524	0.00231	0.04772	0.90652	0.0032	0.00589	0.00273	0.00663	0.00992	0.00416	0.00168	0.00399
O49839	AT1G14370	PBL2	Probable serine/threonine-protein kinase PBL2	PM+nucleus	UNKNOWN	UNKNOWN	PM	NUCLEUS	0	0.00294	0	0.60714	0.00305	0.01682	0.00251	0.00541	0.00356	0.00378	0.17957	0.00401	0.75676	0.00269	0.00939	0.01243
Q8GZ87	AT1G14380	IQD28	Protein IQ-DOMAIN 28	PM	UNKNOWN	UNKNOWN	PM	UNKNOWN	0	0	0	1	0.00228	0.00269	0.00245	0.00397	0.00089	0.002	0.01192	0.00965	0.94248	0.0016	0.00679	0.01328
Q9M9S3	AT1G14410	WHY1	Single-stranded DNA-binding protein WHY1, chloroplastic	CHLOROPLAST	UNKNOWN	PLASTID STROMA	CHLOROPLAST	UNKNOWN	0	0	0	0.96429	0.90867	0.02515	0.00199	0.03406	0.00124	0.00127	0.00743	0.00565	0.00232	0.00122	0.00985	0.00115
Q8LA16	AT1G14510	AL7	PHD finger protein ALFIN-LIKE 7	NUCLEUS	UNKNOWN	UNKNOWN	NUCLEUS	UNKNOWN	0	0	0	0.54762	0.00232	0.00107	0.00078	0.00128	0.0011	0.00573	0.98107	0.0022	0.00088	0.00069	0.00154	0.00135
A8MRM0	AT1G14570	PUX7	UBX domain-containing protein	CYTOSOL	UNKNOWN	UNKNOWN	CYTOSOL	UNKNOWN	0	0	0	0.84524	0.00228	0.75313	0.00499	0.09095	0.00397	0.00672	0.01615	0.02816	0.00841	0.00339	0.07007	0.01179
P93736	AT1G14610	TWN2	Valine--tRNA ligase, mitochondrial 1	CYTOSOL+mitochondrion?	UNKNOWN	UNKNOWN	CYTOSOL	UNKNOWN	0	0	0	1	0.00254	0.84497	0.00144	0.00319	0.00155	0.11483	0.00293	0.00901	0.00296	0.00212	0.00835	0.00611
Q8L7U3	AT1G14620	DECOY	Large ribosomal subunit protein mL46	MITOCHONDRION	MITOCHONDRION	UNKNOWN	MITOCHONDRION	UNKNOWN	0	0	0	1	0.00296	0.00103	0.00275	0.00317	0.0029	0.93708	0.00638	0.03722	0.00179	0.00189	0.00172	0.0011
Q8RXF1	AT1G14650	Q8RXF1	Probable splicing factor 3A subunit 1	NUCLEUS	UNKNOWN	UNKNOWN	NUCLEUS	UNKNOWN	0	0	0	1	0.00193	0.00146	0.00081	0.0014	0.00093	0.0018	0.98573	0.00179	0.00094	0.00071	0.00139	0.0011
Q940S0	AT1G14670	TMN2	Transmembrane 9 superfamily member 2	GOLGI	UNKNOWN	GOLGI TRANS	GOLGI	UNKNOWN	0	0	0	1	0.00151	0.00048	0.00631	0.00293	0.97313	0.00223	0.00324	0.00209	0.00091	0.00421	0.00188	0.00108
F4HWB0	AT1G14710	F4HWB0	Hydroxyproline-rich glycoprotein family protein	CYTOSOL	UNKNOWN	UNKNOWN	CYTOSOL	UNKNOWN	0	0	0	1	0.00137	0.92779	0.00184	0.02802	0.00193	0.0019	0.00637	0.00448	0.00716	0.00295	0.00336	0.01283
Q67ZF6	AT1G14730	CYB561C	Probable transmembrane ascorbate ferrireductase 3	PM+vacuole?	UNKNOWN	UNKNOWN	PM	UNKNOWN	0.00017	0.00017	0	0.60714	0.00285	0.0031	0.00442	0.00707	0.00193	0.01903	0.00218	0.00578	0.82475	0.0026	0.00179	0.1245
Q8VYI4	AT1G14810	Q8VYI4	aspartate-semialdehyde dehydrogenase	CHLOROPLAST	CHLOROPLAST	PLASTID STROMA	CHLOROPLAST	UNKNOWN	0	0	0	1	0.98469	0.00055	0.0015	0.00099	0.00078	0.00184	0.00153	0.00446	0.00097	0.00076	0.00089	0.00104
Q8LF21	AT1G14830	DRP1C	Phragmoplastin DRP1C	PM+er?	UNKNOWN	UNKNOWN	PM	UNKNOWN	0.00042	0.00042	0	1	0.00395	0.00777	0.13312	0.02388	0.05556	0.0051	0.00438	0.00267	0.67917	0.00332	0.00326	0.07781
F4HXV6	AT1G14850	NUP155	Nuclear pore complex protein NUP155	NUCLEUS	NUCLEUS	NUCLEUS	NUCLEUS	UNKNOWN	0	0	0	1	0.00175	0.00087	0.00111	0.00088	0.00129	0.00147	0.98572	0.00232	0.00108	0.00104	0.00133	0.00114
Q9LQU4	AT1G14870	PCR2	Protein PLANT CADMIUM RESISTANCE 2	PM	PM	PM	PM	UNKNOWN	0	0	0	1	0.00426	0.00113	0.01791	0.00571	0.00333	0.00161	0.00236	0.00227	0.94722	0.00732	0.00334	0.00354
F4HXW0	AT1G14890	F4HXW0	Plant invertase/pectin methylesterase inhibitor superfamily protein	?NUCLEUS+EXTRACELLULAR+golgi	UNKNOWN	UNKNOWN	UNKNOWN	UNKNOWN	0.58113	0.58113	0.03337	0.75	0.00968	0.00118	0.0942	0.29305	0.18378	0.00818	0.3731	0.00511	0.00343	0.02115	0.00527	0.00187
Q43386	AT1G14900	HMGA	HMG-Y-related protein A	NUCLEUS	UNKNOWN	UNKNOWN	NUCLEUS	UNKNOWN	0	0	0	0.83333	0.00146	0.00095	0.00193	0.0014	0.00241	0.00152	0.98293	0.0019	0.00122	0.00147	0.00181	0.00099
P94017	AT1G14910	P94017	Putative clathrin assembly protein At1g14910	CYTOSOL+pm?	UNKNOWN	UNKNOWN	CYTOSOL	PM	1e-05	0.01577	1e-05	0.88095	0.00215	0.64135	0.00711	0.07096	0.00168	0.00461	0.00296	0.05263	0.12489	0.00529	0.01052	0.07585
F4HXW9	AT1G14970	OFUT4	O-fucosyltransferase 4	VACUOLE+UNKNOWN	UNKNOWN	UNKNOWN	VACUOLE	UNKNOWN	0	0.35033	0	0.60714	0.00148	0.03682	0.00881	0.00583	0.01174	0.00482	0.01333	0.00407	0.05905	0.00838	0.31065	0.53503
P34893	AT1G14980	CPN10	10 kDa chaperonin, mitochondrial	MITOCHONDRION	MITOCHONDRION	UNKNOWN	MITOCHONDRION	UNKNOWN	0	0	0	1	0.00224	0.00391	0.00144	0.00136	0.00096	0.97668	0.00163	0.00209	0.00279	0.00131	0.00217	0.0034
Q8W4J3	AT1G15020	QSOX1	Sulfhydryl oxidase 1	GOLGI	GOLGI	GOLGI CIS	GOLGI	UNKNOWN	0	0	0	1	0.00202	0.00252	0.06019	0.005	0.884	0.00236	0.00222	0.00149	0.00955	0.02047	0.00351	0.00666
Q8RX69	AT1G15060	Q8RX69	Alpha/beta hydrolase family protein	CHLOROPLAST+MITOCHONDRION	UNKNOWN	PLASTID STROMA	CHLOROPLAST	MITOCHONDRION	0	0.14892	0	0.61905	0.64592	0.00212	0.00495	0.00318	0.0045	0.31921	0.00262	0.00651	0.00201	0.00187	0.00384	0.00328
Q9XI60	AT1G15080	LPP2	Lipid phosphate phosphatase 2	?MITOCHONDRION+PM	UNKNOWN	UNKNOWN	UNKNOWN	UNKNOWN	0.499	0.499	0.00661	0.88095	0.00218	0.00466	0.08452	0.01032	0.00381	0.4283	0.00244	0.00672	0.40982	0.01128	0.00722	0.02873
F4HXY6	AT1G15110	PSS1	CDP-diacylglycerol--serine O-phosphatidyltransferase	ER	UNKNOWN	UNKNOWN	ER	UNKNOWN	0	0	0	1	0.00252	0.00141	0.95291	0.01377	0.00931	0.00316	0.00187	0.00204	0.00222	0.00672	0.00219	0.0019
Q0WWE3	AT1G15120	QCR6-1	Cytochrome b-c1 complex subunit 6-1, mitochondrial	MITOCHONDRION	UNKNOWN	UNKNOWN	MITOCHONDRION	UNKNOWN	0	0	0	0.75	0.01627	0.00158	0.00238	0.00223	0.00451	0.95434	0.00264	0.00227	0.00126	0.00122	0.01005	0.00124
F4HXZ1	AT1G15130	BRO1	Vacuolar-sorting protein BRO1	CYTOSOL+NUCLEUS	UNKNOWN	UNKNOWN	CYTOSOL	NUCLEUS	0	0.48991	0	1	0.00176	0.48111	0.00203	0.00426	0.00196	0.00417	0.43398	0.00581	0.04437	0.00294	0.00473	0.01287
Q9XI55	AT1G15140	FNRL	F9L1.8 protein	CHLOROPLAST	CHLOROPLAST	PLASTID STROMA	CHLOROPLAST	UNKNOWN	0	0	0	1	0.97337	0.00147	0.00232	0.0009	0.00059	0.00101	0.0012	0.00269	0.00437	0.00082	0.00287	0.00839
Q8L731	AT1G15170	DTX12	Protein DETOXIFICATION 12	VACUOLE+unknown?+cytosol?	UNKNOWN	UNKNOWN	VACUOLE	UNKNOWN	3e-05	3e-05	0	0.61905	0.01157	0.10155	0.00501	0.04363	0.00345	0.00936	0.00606	0.01061	0.01277	0.00229	0.10842	0.68528
F4HZI8	AT1G15200	F4HZI8	Protein-protein interaction regulator family protein	NUCLEUS	UNKNOWN	UNKNOWN	NUCLEUS	UNKNOWN	0	0	0	0.75	0.00155	0.00146	0.00115	0.00319	0.00171	0.00149	0.98254	0.00159	0.00129	0.00141	0.00156	0.00107
Q9XI46	AT1G15220	CCMH	Cytochrome c-type biogenesis CcmH-like mitochondrial protein	MITOCHONDRION	UNKNOWN	UNKNOWN	MITOCHONDRION	UNKNOWN	0	0	0	0.96429	0.00412	0.00134	0.00129	0.00205	0.00135	0.97936	0.00283	0.00243	0.00132	0.00087	0.00157	0.00148
Q9XI45	AT1G15230	Q9XI45	At1g15230/F9L1_18	VACUOLE+PM	UNKNOWN	UNKNOWN	VACUOLE	PM	0	0.47226	0	1	0.00131	0.01001	0.00444	0.0032	0.00581	0.00268	0.00253	0.00196	0.45123	0.00457	0.00231	0.50995
F4HZJ6	AT1G15240	SNX3	Phox	ER	ER	ER	ER	UNKNOWN	0	0	0	1	0.00325	0.00341	0.84299	0.00603	0.01816	0.00246	0.0031	0.00188	0.09966	0.00707	0.00229	0.0097
Q8LFH7	AT1G15250	RPL37A	Large ribosomal subunit protein eL37z	CYTOSOL	UNKNOWN	RIBOSOMAL	CYTOSOL	UNKNOWN	0	0	0	0.88095	0.00188	0.83724	0.00341	0.04019	0.00658	0.00499	0.00485	0.0017	0.00643	0.0035	0.01368	0.07555
Q9XI42	AT1G15270	Q9XI42	F9L1.21 protein	PM+CYTOSOL+vacuole?	UNKNOWN	UNKNOWN	PM	CYTOSOL	6e-05	0.13746	6e-05	1	0.00217	0.20472	0.00211	0.01448	0.00228	0.00468	0.09739	0.0074	0.51696	0.00161	0.00479	0.14139
F4HZK3	AT1G15280	BTZ2	CASC3/Barentsz eIF4AIII binding protein	VACUOLE	UNKNOWN	UNKNOWN	VACUOLE	UNKNOWN	0	0	0	1	0.00232	0.03811	0.00138	0.00506	0.00154	0.00361	0.01437	0.00285	0.00252	0.00088	0.00971	0.91763
F4HZK4	AT1G15290	REC3	Protein REDUCED CHLOROPLAST COVERAGE 3	CYTOSOL	UNKNOWN	UNKNOWN	CYTOSOL	UNKNOWN	0	0	0	1	0.00109	0.90457	0.00082	0.00336	0.0016	0.00301	0.06138	0.0032	0.00549	0.00268	0.00283	0.00997
Q9XI36	AT1G15340	MBD10	Methyl-CpG-binding domain-containing protein 10	CYTOSOL	UNKNOWN	UNKNOWN	CYTOSOL	UNKNOWN	0	0	0	1	0.00242	0.95507	0.00091	0.00571	0.00122	0.00537	0.01555	0.00256	0.00183	0.00142	0.00376	0.00417
Q8L920	AT1G15350	Q8L920	DUF4050 family protein	PM	UNKNOWN	UNKNOWN	PM	UNKNOWN	0	0	0	0.95238	0.00194	0.01782	0.01455	0.04464	0.00177	0.002	0.01422	0.00496	0.8848	0.00638	0.00368	0.00324
Q9XI32	AT1G15370	LOLITA	Coatomer subunit zeta	CYTOSOL	UNKNOWN	UNKNOWN	CYTOSOL	UNKNOWN	0	0	0	1	0.00132	0.87115	0.00428	0.02231	0.00219	0.00281	0.00831	0.00382	0.05164	0.00672	0.00209	0.02334
Q9FV53	AT1G15390	PDF1A	Peptide deformylase 1A, chloroplastic/mitochondrial	MITOCHONDRION+CHLOROPLAST	UNKNOWN	UNKNOWN	MITOCHONDRION	CHLOROPLAST	0	0.48643	0	1	0.46464	0.0022	0.00489	0.00361	0.0054	0.50059	0.00317	0.00581	0.00219	0.00182	0.00286	0.00282
Q9XI29	AT1G15400	Q9XI29	Uncharacterized protein At1g15400	PM	UNKNOWN	UNKNOWN	PM	UNKNOWN	0	0	0	1	0.00163	0.00152	0.01095	0.00302	0.00573	0.00198	0.00204	0.00153	0.94764	0.01027	0.00201	0.01169
Q9XI28	AT1G15410	Q9XI28	Aspartate-glutamate racemase family	CHLOROPLAST	UNKNOWN	PLASTID STROMA	CHLOROPLAST	UNKNOWN	0	0	0	0.60714	0.95712	0.0013	0.00132	0.00267	0.00169	0.00151	0.02695	0.00122	0.00089	0.00087	0.00368	0.00079
A0A1P8ATC1	AT1G15420	PCP1	WD repeat protein	NUCLEUS	NUCLEUS	NUCLEUS	NUCLEUS	UNKNOWN	0	0	0	1	0.00131	0.00459	0.00166	0.00089	0.00089	0.00126	0.96887	0.00253	0.00456	0.00226	0.00208	0.00911
Q8VYZ5	AT1G15440	PWP2	Periodic tryptophan protein 2	NUCLEUS	NUCLEUS	NUCLEUS	NUCLEUS	UNKNOWN	0	0	0	1	0.00146	0.00406	0.001	0.00194	0.00094	0.00138	0.98056	0.00188	0.00147	0.0009	0.00195	0.00245
Q9XI22	AT1G15470	XIW1	Serine-threonine kinase receptor-associated protein	CYTOSOL	UNKNOWN	UNKNOWN	CYTOSOL	UNKNOWN	0	0	0	1	0.00217	0.9383	0.00202	0.0134	0.00142	0.00226	0.0071	0.00778	0.005	0.00167	0.01263	0.00626
Q9XI21	AT1G15480	Q9XI21	Pentatricopeptide repeat-containing protein At1g15480, mitochondrial	MITOCHONDRION	MITOCHONDRION	UNKNOWN	MITOCHONDRION	UNKNOWN	0	0	0	1	0.00504	0.00154	0.00115	0.00193	0.00152	0.97831	0.0032	0.00302	0.00108	0.00075	0.00134	0.00113
P92935	AT1G15500	AATP2	ADP,ATP carrier protein 2, chloroplastic	CHLOROPLAST	UNKNOWN	PLASTID MEMBRANE	CHLOROPLAST	UNKNOWN	0	0	0	1	0.92982	0.00037	0.01782	0.00283	0.03646	0.00102	0.00136	0.00397	0.0016	0.00229	0.00153	0.00091
Q9M9E0	AT1G15530	LECRKS1	L-type lectin-domain containing receptor kinase S.1	PM	PM	PM	PM	UNKNOWN	0	0	0	1	0.00224	0.00159	0.01631	0.00457	0.01062	0.00235	0.00251	0.00187	0.94577	0.00636	0.00192	0.00389
P31414	AT1G15690	AVP1	Pyrophosphate-energized vacuolar membrane proton pump 1	VACUOLE	VACUOLE	VACUOLE	VACUOLE	UNKNOWN	0	0	0	1	0.00236	0.00159	0.0034	0.00223	0.00238	0.00254	0.00303	0.00204	0.0036	0.00172	0.00323	0.97189
Q01909	AT1G15700	ATPC2	ATP synthase gamma chain 2, chloroplastic	CHLOROPLAST	CHLOROPLAST	MIM	CHLOROPLAST	UNKNOWN	0	0	0	1	0.98809	0.00044	0.00137	0.00084	0.00092	0.0012	0.00154	0.00215	0.0009	0.00069	0.0009	0.00097
Q9LMR3	AT1G15710	TYRAAT2	Arogenate dehydrogenase 2, chloroplastic	CHLOROPLAST	CHLOROPLAST	PLASTID STROMA	CHLOROPLAST	UNKNOWN	0	0	0	1	0.97117	0.00072	0.0011	0.0012	0.0007	0.00136	0.01396	0.00616	0.00091	0.0006	0.00135	0.00078
Q9LMR1	AT1G15730	Q9LMR1	At1g15730/F7H2_7	CHLOROPLAST	CHLOROPLAST	UNKNOWN	CHLOROPLAST	UNKNOWN	0	0	0	1	0.98252	0.00084	0.00113	0.00118	0.00058	0.00164	0.00272	0.00582	0.00083	0.00058	0.00139	0.00079
Q8H1Q4	AT1G15740	Q8H1Q4	Leucine-rich repeat family protein	PM	UNKNOWN	UNKNOWN	PM	UNKNOWN	0	0	0	1	0.00261	0.00625	0.004	0.01367	0.00243	0.0017	0.03352	0.00648	0.9097	0.00173	0.01144	0.00646
Q94AI7	AT1G15750	TPL	Protein TOPLESS	NUCLEUS	UNKNOWN	UNKNOWN	NUCLEUS	UNKNOWN	0	0	0	1	0.00277	0.00083	0.00073	0.00086	0.00106	0.00207	0.98573	0.00238	0.00079	0.00065	0.00127	0.00086
Q9LMQ8	AT1G15760	Q9LMQ8	At1g15760	VACUOLE	UNKNOWN	UNKNOWN	VACUOLE	UNKNOWN	0	0	0	0.63095	0.0024	0.00357	0.01021	0.00528	0.0045	0.00303	0.08606	0.0033	0.04393	0.00594	0.00556	0.82623
A0A1P8AQ03	AT1G15780	NRB4	Mediator of RNA polymerase II transcription subunit 15a-like protein	NUCLEUS	NUCLEUS	NUCLEUS	NUCLEUS	UNKNOWN	0	0	0	1	0.00174	0.01981	0.00284	0.0017	0.00145	0.00223	0.86305	0.00321	0.04936	0.00271	0.00461	0.04729
A0A1P8AV92	AT1G15790	A0A1P8AV92	Mediator of RNA polymerase II transcription subunit 15a-like protein	CYTOSOL	UNKNOWN	UNKNOWN	CYTOSOL	UNKNOWN	0	0	0	1	0.00131	0.90017	0.01237	0.00542	0.00459	0.00221	0.00239	0.00239	0.04102	0.0188	0.00345	0.00587
Q9LMQ3	AT1G15810	Q9LMQ3	Small ribosomal subunit protein uS15c	MITOCHONDRION	MITOCHONDRION	UNKNOWN	MITOCHONDRION	UNKNOWN	0	0	0	1	0.00257	0.00082	0.00211	0.00218	0.00221	0.97617	0.00222	0.00652	0.00136	0.00166	0.00123	0.00094
Q9LMQ2	AT1G15820	LHCB6	Chlorophyll a-b binding protein, chloroplastic	CHLOROPLAST	CHLOROPLAST	PLASTID MEMBRANE	CHLOROPLAST	UNKNOWN	0	0	0	0.9881	0.96437	0.0006	0.00175	0.00142	0.00116	0.00564	0.00312	0.01815	0.00097	0.00078	0.00125	0.00079
Q7XJ64	AT1G15860	Q7XJ64	Defective in cullin neddylation protein	CYTOSOL	UNKNOWN	UNKNOWN	CYTOSOL	UNKNOWN	0	0	0	1	0.00121	0.87201	0.00164	0.00554	0.00215	0.00256	0.08759	0.00434	0.00895	0.00426	0.00328	0.00649
Q9LMP8	AT1G15870	Q9LMP8	At1g15870/F7H2_19	MITOCHONDRION	MITOCHONDRION	UNKNOWN	MITOCHONDRION	UNKNOWN	0	0	0	0.88095	0.00232	0.0008	0.00226	0.00214	0.00228	0.97344	0.00287	0.0079	0.00143	0.0018	0.00169	0.00106
Q9LMP7	AT1G15880	GOS11	Golgi SNAP receptor complex member 1-1	GOLGI	UNKNOWN	UNKNOWN	GOLGI	UNKNOWN	0	0	0	1	0.00257	0.022	0.05949	0.00734	0.80753	0.00391	0.00202	0.0021	0.03371	0.04449	0.00383	0.011
Q3EDB5	AT1G15900	Q3EDB5	Transmembrane protein	GOLGI	UNKNOWN	UNKNOWN	GOLGI	UNKNOWN	0	0	0	0.86905	0.00183	0.00049	0.00264	0.00262	0.97871	0.00251	0.00253	0.00231	0.00075	0.00204	0.00272	0.00085
Q9S9P3	AT1G15910	FDM1	Factor of DNA methylation 1	NUCLEUS	NUCLEUS	NUCLEUS	NUCLEUS	UNKNOWN	0	0	0	1	0.00134	0.09533	0.00135	0.00218	0.00131	0.00263	0.8748	0.00292	0.00486	0.00192	0.00392	0.00743
Q9S9P2	AT1G15920	CAF1-2	Probable CCR4-associated factor 1 homolog 2	CYTOSOL+nucleus?	UNKNOWN	UNKNOWN	CYTOSOL	UNKNOWN	5e-05	5e-05	0	0.9881	0.00171	0.75369	0.00122	0.00603	0.00167	0.00995	0.12079	0.0062	0.00364	0.00163	0.0715	0.02197
Q9S9P1	AT1G15930	RPS12A	Small ribosomal subunit protein eS12z	CYTOSOL	CYTOSOL	RIBOSOMAL	CYTOSOL	UNKNOWN	0	0	0	1	0.00102	0.92518	0.0016	0.00558	0.00241	0.00227	0.03576	0.00242	0.00875	0.00535	0.00239	0.00726
Q9S9P0	AT1G15940	PDS5E	Sister chromatid cohesion protein PDS5 homolog E	NUCLEUS	NUCLEUS	NUCLEUS	NUCLEUS	UNKNOWN	0	0	0	1	0.00142	0.00124	0.00129	0.00082	0.00094	0.00124	0.98457	0.00247	0.0015	0.0012	0.00151	0.00181
Q9S9N9	AT1G15950	CCR1	Cinnamoyl-CoA reductase 1	NUCLEUS+CYTOSOL	UNKNOWN	UNKNOWN	NUCLEUS	CYTOSOL	0	0.12013	0	1	0.00188	0.2543	0.00203	0.0033	0.00186	0.00452	0.61385	0.00467	0.06808	0.00251	0.00461	0.0384
Q9S9N7	AT1G15970	Q9S9N7	At1g15970	NUCLEUS+PM	UNKNOWN	UNKNOWN	NUCLEUS	PM	0	0.021	0	0.7381	0.00396	0.01329	0.00438	0.00294	0.00152	0.00286	0.67733	0.0043	0.20879	0.00342	0.03356	0.04366
P93048	AT1G16000	OEP91	GAG1At protein	MITOCHONDRION	MITOCHONDRION	UNKNOWN	MITOCHONDRION	UNKNOWN	0	0	0	1	0.01094	0.0023	0.00122	0.00257	0.0021	0.96942	0.00312	0.00232	0.00113	0.0008	0.00279	0.00129
F4I2S4	AT1G16020	CCZ1A	Vacuolar fusion protein CCZ1 homolog A	VACUOLE+CYTOSOL	UNKNOWN	UNKNOWN	VACUOLE	CYTOSOL	0	0.41733	0	1	0.00187	0.37098	0.00491	0.04246	0.00285	0.00352	0.00438	0.00752	0.04778	0.00292	0.01601	0.49481
Q9S9M7	AT1G16080	Q9S9M7	Nuclear protein	CYTOSOL+CHLOROPLAST	UNKNOWN	UNKNOWN	CYTOSOL	CHLOROPLAST	0	0.45397	0	0.97619	0.42483	0.5209	0.00423	0.01563	0.0032	0.00525	0.00289	0.00602	0.00445	0.00192	0.00576	0.00492
Q9S9L9	AT1G16180	Q9S9L9	Serinc-domain containing serine and sphingolipid biosynthesis protein	?VACUOLE+ER+golgi?	UNKNOWN	UNKNOWN	UNKNOWN	UNKNOWN	0.38889	0.38889	0.00717	0.85714	0.00404	0.00499	0.22745	0.06414	0.12086	0.0073	0.00366	0.00413	0.0811	0.04252	0.0033	0.43651
Q84L32	AT1G16190	RAD23A	Probable ubiquitin receptor RAD23a	CYTOSOL+CHLOROPLAST	UNKNOWN	UNKNOWN	CYTOSOL	CHLOROPLAST	0	0.194	0	0.63095	0.31167	0.62181	0.00327	0.01739	0.00212	0.00565	0.00487	0.00297	0.00382	0.00147	0.01647	0.00849
Q8VYC9	AT1G16210	Q8VYC9	Coiled-coil protein	CYTOSOL+NUCLEUS	UNKNOWN	UNKNOWN	CYTOSOL	NUCLEUS	0	0.38707	0	1	0.00132	0.56332	0.00105	0.00211	0.00146	0.00335	0.38353	0.00435	0.0107	0.00162	0.00669	0.02049
Q9SA23	AT1G16240	SYP51	Syntaxin-51	VACUOLE	VACUOLE	VACUOLE	VACUOLE	UNKNOWN	0	0	0	1	0.00132	0.00245	0.00473	0.00312	0.0023	0.00144	0.00387	0.00202	0.01101	0.00423	0.00224	0.96127
Q9SA26	AT1G16270	B4	F3O9.7 protein	CYTOSOL+extracellular	UNKNOWN	UNKNOWN	CYTOSOL	EXTRACELLULAR	0	0.00318	0	0.61905	0.00311	0.69526	0.00259	0.15391	0.00371	0.01099	0.03472	0.00484	0.00751	0.00334	0.0559	0.02413
Q9SA27	AT1G16280	RH36	DEAD-box ATP-dependent RNA helicase 36	NUCLEUS	UNKNOWN	UNKNOWN	NUCLEUS	UNKNOWN	0	0	0	0.65476	0.00147	0.0061	0.00639	0.00424	0.00095	0.00108	0.94405	0.00944	0.01245	0.00253	0.00379	0.0075
Q5E924	AT1G16300	GAPCP2	Glyceraldehyde-3-phosphate dehydrogenase GAPCP2, chloroplastic	CHLOROPLAST	CHLOROPLAST	PLASTID STROMA	CHLOROPLAST	UNKNOWN	0	0	0	1	0.98707	0.00074	0.00143	0.00117	0.00084	0.00079	0.00206	0.00126	0.00102	0.00073	0.00182	0.00106
Q9SA34	AT1G16350	Q9SA34	Inosine-5'-monophosphate dehydrogenase 2	CYTOSOL+NUCLEUS	UNKNOWN	UNKNOWN	CYTOSOL	NUCLEUS	0	0.49845	0	1	0.00146	0.47882	0.00117	0.002	0.00179	0.00422	0.46954	0.00416	0.00932	0.00222	0.00576	0.01953
O23708	AT1G16470	PAB1	Proteasome subunit alpha type-2-A	CYTOSOL	UNKNOWN	UNKNOWN	CYTOSOL	UNKNOWN	0	0	0	1	0.00127	0.9509	0.00098	0.0069	0.00135	0.00193	0.01513	0.00188	0.00373	0.00219	0.00217	0.01158
Q9SA50	AT1G16520	NAIP2	At1g16520	PM	UNKNOWN	UNKNOWN	PM	UNKNOWN	0	0	0	1	0.00159	0.09929	0.00376	0.02744	0.00205	0.00308	0.01107	0.00711	0.80232	0.00203	0.02306	0.01719
Q9FX73	AT1G16560	Q9FX73	Post-GPI attachment to proteins factor 3	ER	UNKNOWN	UNKNOWN	ER	UNKNOWN	0	0	0	1	0.00261	0.00107	0.9562	0.00211	0.01011	0.00165	0.0013	0.00097	0.0078	0.01113	0.00167	0.00338
Q8L7M0	AT1G16570	TUN	UDP-glycosyltransferase TURAN	ER	UNKNOWN	UNKNOWN	ER	UNKNOWN	0	0	0	1	0.00273	0.00187	0.9572	0.00214	0.00216	0.00278	0.00256	0.00881	0.0077	0.00436	0.00495	0.00274
A0A1P8APW3	AT1G16610	SR45	Arginine/serine-rich 45	NUCLEUS	UNKNOWN	UNKNOWN	NUCLEUS	UNKNOWN	0	0	0	0.75	0.00212	0.00256	0.00102	0.00907	0.00118	0.00338	0.97215	0.00297	0.00155	0.00079	0.00208	0.00113
Q9FX83	AT1G16700	Q9FX83	NADH dehydrogenase [ubiquinone] iron-sulfur protein 8-B, mitochondrial	MITOCHONDRION	UNKNOWN	MIM	MITOCHONDRION	UNKNOWN	0	0	0	0.95238	0.01699	0.00081	0.00173	0.00268	0.00191	0.96058	0.00667	0.00366	0.00123	0.00106	0.00135	0.00132
Q9FWQ5	AT1G16710	HAC12	Histone acetyltransferase HAC12	CHLOROPLAST	UNKNOWN	UNKNOWN	CHLOROPLAST	UNKNOWN	0	0	0	0.60714	0.97983	0.00158	0.0011	0.00384	0.00146	0.0012	0.00455	0.00104	0.00064	0.00055	0.00354	0.00069
Q8W4D6	AT1G16720	HCF173	Protein HIGH CHLOROPHYLL FLUORESCENCE PHENOTYPE 173, chloroplastic	CHLOROPLAST	UNKNOWN	PLASTID STROMA	CHLOROPLAST	UNKNOWN	0	0	0	0.60714	0.90887	0.01437	0.00214	0.01747	0.0019	0.00118	0.04005	0.00176	0.00193	0.00116	0.00817	0.001
Q8LCN1	AT1G16740	Q8LCN1	50S ribosomal protein L20	MITOCHONDRION	MITOCHONDRION	UNKNOWN	MITOCHONDRION	UNKNOWN	0	0	0	1	0.00177	0.00141	0.00117	0.00259	0.00163	0.98266	0.0029	0.0013	0.00109	0.0011	0.00107	0.0013
Q9FWR2	AT1G16780	AVPL2	Pyrophosphate-energized membrane proton pump 3	GOLGI+peroxisome	UNKNOWN	UNKNOWN	GOLGI	UNKNOWN	5e-05	5e-05	0	1	0.00689	0.00286	0.00702	0.02735	0.74453	0.01174	0.01168	0.16876	0.00183	0.00556	0.00983	0.00196
Q6NQG3	AT1G16790	Q6NQG3	At1g16790	CHLOROPLAST	CHLOROPLAST	UNKNOWN	CHLOROPLAST	UNKNOWN	0	0	0	1	0.94448	0.00113	0.00344	0.00982	0.01161	0.00074	0.00986	0.00521	0.00107	0.0009	0.01128	0.00046
Q9FZ45	AT1G16860	Q9FZ45	Uncharacterized membrane protein At1g16860	PM	UNKNOWN	UNKNOWN	PM	UNKNOWN	0	0	0	1	0.00204	0.00167	0.00554	0.00265	0.00403	0.00232	0.00222	0.00201	0.96702	0.00456	0.00208	0.00387
Q8W4K2	AT1G16870	F6I1.13	Small ribosomal subunit protein mS29	MITOCHONDRION	MITOCHONDRION	UNKNOWN	MITOCHONDRION	UNKNOWN	0	0	0	1	0.00272	0.00167	0.00097	0.00315	0.00181	0.97178	0.01008	0.00392	0.00098	0.00073	0.00123	0.00096
Q9FZ48	AT1G16890	UBC36	Ubiquitin-conjugating enzyme E2 36	CYTOSOL	UNKNOWN	UNKNOWN	CYTOSOL	UNKNOWN	0	0	0	0.7381	0.0024	0.80961	0.02258	0.01637	0.00634	0.00345	0.00463	0.00347	0.09143	0.03138	0.00502	0.00332
Q9FZ49	AT1G16900	ALG9	Alpha-1,2-mannosyltransferase ALG9	ER	UNKNOWN	UNKNOWN	ER	UNKNOWN	0	0	0	1	0.00403	0.00139	0.91143	0.04231	0.01815	0.00267	0.0022	0.00195	0.00329	0.00854	0.00213	0.0019
Q39222	AT1G16920	RABA1B	Ras-related protein RABA1b	PM+er?	UNKNOWN	UNKNOWN	PM	ER	0	0.00499	0	1	0.00306	0.06742	0.14281	0.05399	0.026	0.00614	0.00415	0.00384	0.66428	0.01704	0.00459	0.00667
Q39224	AT1G17020	SRG1	Protein SRG1	CYTOSOL	UNKNOWN	UNKNOWN	CYTOSOL	UNKNOWN	0	0	0	0.52381	0.00197	0.87092	0.00153	0.02691	0.00191	0.0357	0.01209	0.00215	0.00215	0.00178	0.01454	0.02835
Q9SHG6	AT1G17070	STIPL1	Septin and tuftelin-interacting protein 1 homolog 1	NUCLEUS	UNKNOWN	NUCLEUS	NUCLEUS	UNKNOWN	0	0	0	1	0.0019	0.0018	0.00151	0.00323	0.00223	0.00123	0.97899	0.00135	0.00139	0.00169	0.0037	0.00098
Q9SHG7	AT1G17080	Q9SHG7	At1g17080/F6I1.24	VACUOLE	UNKNOWN	UNKNOWN	VACUOLE	UNKNOWN	0	0	0	0.54762	0.00109	0.00345	0.00208	0.00117	0.00186	0.00191	0.01225	0.00133	0.01391	0.00305	0.00262	0.95528
Q9SHG8	AT1G17100	HBP1	At1g17100	CYTOSOL+peroxisome?+extracellular?	UNKNOWN	UNKNOWN	CYTOSOL	UNKNOWN	0.00012	0.00012	0	0.88095	0.00237	0.71444	0.00267	0.10403	0.00245	0.02711	0.0035	0.10732	0.00745	0.0042	0.01651	0.00796
Q9SHH0	AT1G17120	CAT8	Cationic amino acid transporter 8, vacuolar	PM	UNKNOWN	UNKNOWN	PM	UNKNOWN	0	0	0	0.95238	0.00191	0.00341	0.00667	0.00417	0.00943	0.00218	0.00238	0.00165	0.94966	0.00322	0.00484	0.01047
A8MR03	AT1G17130	CWC16B	Splicing factor YJU2	NUCLEUS	UNKNOWN	UNKNOWN	NUCLEUS	UNKNOWN	0	0	0	0.60714	0.00191	0.00112	0.00092	0.00167	0.00102	0.00198	0.98426	0.00221	0.00104	0.00133	0.00144	0.0011
Q940G8	AT1G17145	DA2L	E3 ubiquitin-protein ligase DA2L	CHLOROPLAST	UNKNOWN	UNKNOWN	CHLOROPLAST	UNKNOWN	0	0	0	0.60714	0.97707	0.00075	0.00536	0.00157	0.00173	0.0006	0.00122	0.00119	0.00264	0.00354	0.00325	0.00108
A1A6H3	AT1G17160	RBSK	Ribokinase	CHLOROPLAST	CHLOROPLAST	PLASTID STROMA	CHLOROPLAST	UNKNOWN	0	0	0	1	0.98429	0.00132	0.00167	0.0008	0.00065	0.00083	0.00103	0.00153	0.00206	0.00066	0.00212	0.00303
Q9SHH6	AT1G17170	GSTU24	Glutathione S-transferase U24	CYTOSOL	UNKNOWN	UNKNOWN	CYTOSOL	UNKNOWN	0	0	0	0.9881	0.00304	0.8658	0.00206	0.08534	0.00442	0.00743	0.00595	0.00256	0.00422	0.00363	0.00916	0.0064
Q9SHI1	AT1G17220	Q9SHI1	Translation initiation factor IF-2, chloroplastic	CHLOROPLAST	CHLOROPLAST	PLASTID STROMA	CHLOROPLAST	UNKNOWN	0	0	0	1	0.98783	0.00077	0.00103	0.00137	0.00085	0.00089	0.00269	0.00127	0.00073	0.00053	0.00134	0.0007
Q43128	AT1G17260	AHA10	ATPase 10, plasma membrane-type	PM	UNKNOWN	UNKNOWN	PM	UNKNOWN	0	0	0	0.97619	0.00155	0.0019	0.00431	0.00314	0.00293	0.00171	0.00266	0.00146	0.9615	0.00351	0.00156	0.01378
Q84WU0	AT1G17270	OFUT5	O-fucosyltransferase 5	EXTRACELLULAR+TGN	UNKNOWN	UNKNOWN	EXTRACELLULAR	TGN	0	0.38075	0	0.86905	0.00811	0.00493	0.0082	0.54522	0.01327	0.00324	0.00332	0.00812	0.00294	0.39326	0.00833	0.00105
F4I7I0	AT1G17290	ALAAT1	Alanine aminotransferase 1, mitochondrial	MITOCHONDRION+CYTOSOL	UNKNOWN	UNKNOWN	MITOCHONDRION	CYTOSOL	0	0.40018	0	1	0.00171	0.40189	0.00191	0.00314	0.00234	0.55565	0.00363	0.00365	0.00605	0.0026	0.00618	0.01124
Q9LQI7	AT1G17350	Q9LQI7	Probable complex I intermediate-associated protein 30	MITOCHONDRION	UNKNOWN	UNKNOWN	MITOCHONDRION	UNKNOWN	0	0	0	1	0.00195	0.00107	0.00313	0.00225	0.00143	0.97407	0.00166	0.00571	0.00267	0.00309	0.00143	0.00154
Q9LQI9	AT1G17370	UBP1B	Oligouridylate-binding protein 1B	NUCLEUS+CYTOSOL	UNKNOWN	UNKNOWN	NUCLEUS	CYTOSOL	0	0.16151	0	0.9881	0.00196	0.30337	0.00178	0.01251	0.0021	0.00455	0.64369	0.00347	0.0073	0.00252	0.00867	0.00809
Q9LNR3	AT1G17420	LOX3	Lipoxygenase 3, chloroplastic	CHLOROPLAST+NUCLEUS	UNKNOWN	UNKNOWN	CHLOROPLAST	NUCLEUS	0	0.03718	0	0.75	0.72376	0.00134	0.00173	0.00186	0.00125	0.00298	0.25068	0.00976	0.00166	0.00083	0.00283	0.00133
Q9LQK0	AT1G17470	DRG1	Developmentally-regulated G-protein 1	CYTOSOL	UNKNOWN	UNKNOWN	CYTOSOL	UNKNOWN	0	0	0	1	0.00204	0.85914	0.00071	0.00662	0.00113	0.00586	0.06711	0.03427	0.00336	0.00233	0.00828	0.00916
Q9LNQ4	AT1G17500	ALA4	Probable phospholipid-transporting ATPase 4	PM+peroxisome?	UNKNOWN	UNKNOWN	PM	PEROXISOME	0	0.00868	0	0.61905	0.00465	0.00687	0.01406	0.01331	0.0051	0.00359	0.00347	0.12589	0.66041	0.0142	0.07984	0.06861
A0A1P8AV91	AT1G17530	TIM23-1	Translocase of inner mitochondrial membrane 23	MITOCHONDRION	UNKNOWN	MIM	MITOCHONDRION	UNKNOWN	0	0	0	0.7381	0.00344	0.00094	0.00293	0.00201	0.00223	0.97741	0.00176	0.00133	0.00222	0.00165	0.00261	0.00147
Q39160	AT1G17580	XI-1	Myosin-5	?GOLGI+er+extracellular+unknown?	UNKNOWN	UNKNOWN	UNKNOWN	UNKNOWN	0.82009	0.82009	0.34667	1	0.00668	0.03309	0.19009	0.18673	0.29866	0.03577	0.00455	0.05892	0.00788	0.00536	0.13192	0.04035
Q9LNP3	AT1G17620	Q9LNP3	At1g17620/F11A6_23	PM+ER+golgi?	UNKNOWN	UNKNOWN	PM	ER	0	0.09936	0	1	0.00901	0.0021	0.23985	0.01088	0.10762	0.00614	0.00545	0.00657	0.59285	0.00761	0.00482	0.00708
F4I906	AT1G17640	RBGD1	RNA-binding	NUCLEUS	UNKNOWN	UNKNOWN	NUCLEUS	UNKNOWN	0	0	0	0.60714	0.00139	0.0039	0.00352	0.00227	0.0017	0.00156	0.96053	0.00269	0.00601	0.01094	0.00255	0.00292
F4I907	AT1G17650	GLYR2	Glyoxylate/succinic semialdehyde reductase 2, chloroplastic	CHLOROPLAST	UNKNOWN	UNKNOWN	CHLOROPLAST	UNKNOWN	0	0	0	1	0.96363	0.00128	0.00175	0.00103	0.00133	0.01913	0.00173	0.00319	0.00104	0.00073	0.00267	0.00249
Q8H1E7	AT1G17690	NOF1	Protein NUCLEOLAR FACTOR 1	NUCLEUS	UNKNOWN	UNKNOWN	NUCLEUS	UNKNOWN	0	0	0	1	0.00229	0.00106	0.00076	0.00189	0.00154	0.00247	0.9841	0.00195	0.0009	0.00075	0.00129	0.001
Q9FZ62	AT1G17710	Q9FZ62	Inorganic pyrophosphatase 2	CYTOSOL	CYTOSOL	CYTOSOL	CYTOSOL	UNKNOWN	0	0	0	1	0.00262	0.97385	0.00123	0.00221	0.00178	0.00301	0.00187	0.00192	0.00183	0.00186	0.0036	0.00423
Q39247	AT1G17720	PP2AB2	Serine/threonine protein phosphatase 2A 55 kDa regulatory subunit B beta isoform	CYTOSOL	UNKNOWN	CYTOSOL	CYTOSOL	UNKNOWN	0	0	0	1	0.00105	0.87763	0.00355	0.00404	0.0018	0.00236	0.00231	0.00171	0.01739	0.00204	0.02265	0.06348
Q8LE58	AT1G17730	CHMP1A	ESCRT-related protein CHMP1A	PM	UNKNOWN	UNKNOWN	PM	UNKNOWN	0	0	0	0.86905	0.00125	0.01813	0.01312	0.04348	0.00701	0.00205	0.01278	0.00319	0.83043	0.00978	0.00402	0.05477
O04130	AT1G17745	PGDH2	D-3-phosphoglycerate dehydrogenase 2, chloroplastic	CHLOROPLAST	CHLOROPLAST	PLASTID STROMA	CHLOROPLAST	UNKNOWN	0	0	0	1	0.98862	0.00065	0.00112	0.00095	0.00077	0.0012	0.00162	0.00156	0.00081	0.00061	0.00107	0.00101
Q9FZ59	AT1G17750	PEPR2	Leucine-rich repeat receptor-like protein kinase PEPR2	PM	UNKNOWN	UNKNOWN	PM	UNKNOWN	0	0	0	0.84524	0.00946	0.00158	0.01194	0.00799	0.00322	0.0013	0.0033	0.00218	0.94473	0.00791	0.00437	0.00201
Q8GUP1	AT1G17760	CSTF77	Cleavage stimulation factor subunit 77	NUCLEUS	UNKNOWN	UNKNOWN	NUCLEUS	UNKNOWN	0	0	0	0.95238	0.00167	0.00079	0.00207	0.00313	0.00403	0.00148	0.97881	0.00209	0.00107	0.00124	0.00289	0.00072
Q8L7M7	AT1G17820	Q8L7M7	At1g17820	?ER+pm+extracellular?+vacuole?	UNKNOWN	UNKNOWN	UNKNOWN	UNKNOWN	0.40471	0.40471	0.01121	0.92857	0.00639	0.08914	0.40013	0.14921	0.03709	0.00718	0.00487	0.00451	0.15927	0.00652	0.00985	0.12581
Q9LMU2	AT1G17860	KTI5	Kunitz trypsin inhibitor 5	EXTRACELLULAR	EXTRACELLULAR	EXTRACELLULAR	EXTRACELLULAR	UNKNOWN	0	0	0	0.86905	0.00571	0.00134	0.08404	0.85625	0.02971	0.00415	0.00282	0.00304	0.00298	0.00559	0.00239	0.00198
Q9SMW7	AT1G17880	BTF3	Basic transcription factor 3	CYTOSOL+VACUOLE	UNKNOWN	UNKNOWN	CYTOSOL	VACUOLE	0	0.16819	0	1	0.00116	0.64368	0.0012	0.00384	0.00116	0.0033	0.01456	0.00278	0.00743	0.00121	0.00335	0.31631
B9DH36	AT1G17890	GER2	GDP-L-fucose synthase	CYTOSOL	UNKNOWN	UNKNOWN	CYTOSOL	UNKNOWN	0	0	0	1	0.0013	0.93832	0.00166	0.00444	0.00132	0.00254	0.01219	0.00329	0.00719	0.00194	0.02197	0.00385
Q9LMT7	AT1G17930	MAIN	Protein MAINTENANCE OF MERISTEMS	NUCLEUS	UNKNOWN	UNKNOWN	NUCLEUS	UNKNOWN	0	0	0	0.7381	0.00862	0.00337	0.00097	0.00248	0.00096	0.00231	0.96838	0.00162	0.00106	0.00072	0.00858	0.00094
Q9LMT6	AT1G17940	Q9LMT6	At1g17940	UNKNOWN+PM+chloroplast?	UNKNOWN	UNKNOWN	UNKNOWN	PM	6e-05	0.49063	6e-05	1	0.13067	0.00722	0.01235	0.0072	0.00402	0.00227	0.01163	0.00585	0.34552	0.00904	0.45422	0.01
Q9LMT2	AT1G17980	PAPS1	Nuclear poly(A) polymerase 1	EXTRACELLULAR+NUCLEUS	UNKNOWN	UNKNOWN	EXTRACELLULAR	NUCLEUS	0	0.42212	0	0.63095	0.00928	0.00707	0.00441	0.50347	0.00767	0.02325	0.34699	0.00941	0.00586	0.00337	0.07661	0.00262
Q8L835	AT1G18070	Q8L835	Eukaryotic peptide chain release factor GTP-binding subunit	CYTOSOL+nucleus?	UNKNOWN	UNKNOWN	CYTOSOL	UNKNOWN	0.00013	0.00013	0	1	0.0013	0.77462	0.00128	0.00364	0.00149	0.00366	0.14399	0.00377	0.03888	0.00274	0.00347	0.02116
O24456	AT1G18080	RACK1A	Small ribosomal subunit protein RACK1z	CYTOSOL+nucleus	UNKNOWN	RIBOSOMAL	CYTOSOL	UNKNOWN	0.00021	0.00021	0	1	0.00167	0.77756	0.00124	0.00496	0.00226	0.00406	0.18326	0.00416	0.00523	0.00381	0.00396	0.00783
Q9LM33	AT1G18150	MPK8	Mitogen-activated protein kinase 8	CYTOSOL+pm?	UNKNOWN	UNKNOWN	CYTOSOL	UNKNOWN	0.00017	0.00017	0	1	0.00192	0.7908	0.00449	0.01682	0.0026	0.00228	0.00617	0.00625	0.12209	0.00274	0.02282	0.02102
F4IAN2	AT1G18160	M3KDELTA7	non-specific serine/threonine protein kinase	CYTOSOL+pm?	UNKNOWN	UNKNOWN	CYTOSOL	UNKNOWN	4e-05	4e-05	0	0.7381	0.0025	0.79232	0.01253	0.0134	0.00513	0.00225	0.0171	0.00198	0.11045	0.01348	0.02342	0.00544
F4IAN4	AT1G18180	F4IAN4	3-oxo-5-alpha-steroid 4-dehydrogenase	PM	PM	PM	PM	UNKNOWN	0	0	0	1	0.00303	0.00159	0.0704	0.00768	0.02591	0.00412	0.00245	0.0025	0.85406	0.0066	0.00207	0.01959
B0F9L7	AT1G18190	GC2	Golgin candidate 2	GOLGI+er?	GOLGI	UNKNOWN	GOLGI	UNKNOWN	0	0	0	1	0.00275	0.00301	0.12549	0.01502	0.81583	0.0026	0.00359	0.00195	0.00579	0.01104	0.00554	0.00739
Q9LE22	AT1G18210	CML27	Probable calcium-binding protein CML27	PM+golgi	UNKNOWN	UNKNOWN	PM	UNKNOWN	0.00036	0.00036	0	1	0.00641	0.00587	0.0592	0.00696	0.15836	0.00647	0.00434	0.00247	0.71955	0.0065	0.01128	0.01259
F4IAP1	AT1G18250	ATLP-1	Pathogenesis-related thaumatin superfamily protein	NUCLEUS+extracellular	UNKNOWN	UNKNOWN	NUCLEUS	UNKNOWN	0.00072	0.00072	0	0.5	0.00354	0.0061	0.01866	0.15632	0.00349	0.00464	0.76607	0.00666	0.01633	0.00595	0.00609	0.00614
Q9LM25	AT1G18260	HRD3A	ERAD-associated E3 ubiquitin-protein ligase component HRD3A	ER	ER	ER	ER	UNKNOWN	0	0	0	1	0.00205	0.0014	0.96442	0.0029	0.00674	0.00157	0.0018	0.00113	0.00648	0.00635	0.00192	0.00325
Q8VYC5	AT1G18270	Q8VYC5	Ketose-bisphosphate aldolase class-II family protein	CYTOSOL+pm+vacuole?	UNKNOWN	UNKNOWN	CYTOSOL	PM	0	0.0013	0	0.88095	0.00094	0.70398	0.00218	0.00408	0.00161	0.00283	0.00467	0.0021	0.16615	0.00295	0.00389	0.10463
Q8S905	AT1G18370	KIN7A	Kinesin-like protein KIN-7A	NUCLEUS+unknown?	UNKNOWN	UNKNOWN	NUCLEUS	UNKNOWN	0	0	0	0.5119	0.00633	0.00636	0.00191	0.00209	0.00172	0.00316	0.84727	0.00352	0.00272	0.00152	0.11845	0.00496
P0C5E2	AT1G18390	LRK10L-1.2	LEAF RUST 10 DISEASE-RESISTANCE LOCUS RECEPTOR-LIKE PROTEIN KINASE-like 1.2	PM+unknown?	UNKNOWN	UNKNOWN	PM	UNKNOWN	0	0.08425	0	0.57143	0.00391	0.01073	0.07402	0.02599	0.0044	0.00296	0.04411	0.00461	0.62019	0.05514	0.11118	0.04275
Q8GW64	AT1G18440	Q8GW64	Peptidyl-tRNA hydrolase, chloroplastic	MITOCHONDRION	UNKNOWN	UNKNOWN	MITOCHONDRION	UNKNOWN	0	0	0	0.86905	0.02815	0.00209	0.00179	0.00288	0.00277	0.88721	0.04142	0.02425	0.00141	0.00097	0.00555	0.00151
Q84M92	AT1G18450	ARP4	Actin-related protein 4	NUCLEUS	UNKNOWN	UNKNOWN	NUCLEUS	UNKNOWN	0	0	0	1	0.00122	0.02082	0.00176	0.00106	0.00105	0.00154	0.94346	0.00264	0.00968	0.00278	0.00295	0.01105
Q944L7	AT1G18480	SLP2	Shewanella-like protein phosphatase 2	MITOCHONDRION	UNKNOWN	UNKNOWN	MITOCHONDRION	UNKNOWN	0	0	0	0.88095	0.00178	0.00116	0.01148	0.00375	0.00578	0.93599	0.0023	0.02512	0.00357	0.00421	0.00336	0.00151
Q1G3U6	AT1G18490	PCO3	Plant cysteine oxidase 3	MITOCHONDRION+CHLOROPLAST	UNKNOWN	UNKNOWN	MITOCHONDRION	CHLOROPLAST	0	0.01706	0	0.75	0.2383	0.00194	0.0066	0.00315	0.00314	0.72404	0.00207	0.00738	0.0039	0.00267	0.00312	0.00368
Q9LPR4	AT1G18500	IPMS1	2-isopropylmalate synthase 1, chloroplastic	CHLOROPLAST	CHLOROPLAST	PLASTID STROMA	CHLOROPLAST	UNKNOWN	0	0	0	1	0.96014	0.00092	0.00112	0.00108	0.00072	0.00917	0.01672	0.00607	0.00083	0.00053	0.00159	0.0011
Q9FZ76	AT1G18540	RPL6A	Large ribosomal subunit protein eL6z	CYTOSOL	CYTOSOL	RIBOSOMAL	CYTOSOL	UNKNOWN	0	0	0	1	0.00166	0.93077	0.00113	0.02387	0.00156	0.00221	0.0125	0.00641	0.00533	0.00286	0.00355	0.00814
Q949Q1	AT1G18580	GAUT11	Hexosyltransferase GAUT11	GOLGI+ER	UNKNOWN	GOLGI CIS	GOLGI	ER	0	0.21401	0	1	0.00399	0.00377	0.32851	0.01229	0.60454	0.00349	0.00292	0.00157	0.00752	0.02003	0.0046	0.00679
Q9FZ81	AT1G18600	RBL12	RHOMBOID-like protein 12, mitochondrial	MITOCHONDRION	MITOCHONDRION	UNKNOWN	MITOCHONDRION	UNKNOWN	0	0	0	0.86905	0.01457	0.00084	0.00204	0.00236	0.002	0.96765	0.00234	0.00316	0.00134	0.00109	0.00138	0.00122
Q9FZ82	AT1G18610	Q9FZ82	F25I16.5 protein	NUCLEUS	UNKNOWN	UNKNOWN	NUCLEUS	UNKNOWN	0	0	0	0.86905	0.0016	0.00206	0.00365	0.00241	0.00237	0.00147	0.95426	0.00383	0.00459	0.01945	0.00236	0.00195
A8MQH9	AT1G18620	TRM3	LONGIFOLIA protein	?UNKNOWN+CYTOSOL+mitochondrion?	UNKNOWN	UNKNOWN	UNKNOWN	UNKNOWN	0.4176	0.4176	0.03681	0.5119	0.00317	0.20951	0.00392	0.00679	0.00304	0.11968	0.00713	0.00816	0.00696	0.00395	0.52927	0.09842
Q9FZ84	AT1G18630	RBG6	Small ribosomal subunit protein mS86	MITOCHONDRION	MITOCHONDRION	UNKNOWN	MITOCHONDRION	UNKNOWN	0	0	0	1	0.0011	0.00146	0.00166	0.00253	0.00171	0.98148	0.00188	0.00275	0.00139	0.00159	0.00127	0.00118
O82796	AT1G18640	PSP	Phosphoserine phosphatase, chloroplastic	CHLOROPLAST	UNKNOWN	UNKNOWN	CHLOROPLAST	UNKNOWN	0	0	0	1	0.98785	0.00094	0.0014	0.00127	0.001	0.00073	0.00134	0.00091	0.00109	0.00066	0.00162	0.00118
Q8H0X2	AT1G18660	IAP1	At1g18660	CYTOSOL+vacuole?	UNKNOWN	UNKNOWN	CYTOSOL	VACUOLE	0	0.00788	0	0.7619	0.00248	0.61628	0.00653	0.08104	0.0033	0.00699	0.00641	0.06267	0.01888	0.00408	0.05962	0.13173
F4ICB6	AT1G18670	IBS1	Protein IMPAIRED IN BABA-INDUCED STERILITY 1	PM	PM	PM	PM	UNKNOWN	0	0	0	1	0.00154	0.01023	0.00354	0.01004	0.00126	0.0011	0.00363	0.00246	0.94908	0.00386	0.00461	0.00863
Q9M9T9	AT1G18680	M20	F6A14.21 protein	MITOCHONDRION	UNKNOWN	UNKNOWN	MITOCHONDRION	UNKNOWN	0	0	0	1	0.00351	0.00195	0.03006	0.00481	0.01509	0.8884	0.00239	0.0031	0.00502	0.00529	0.0388	0.00159
A0A1P8AM23	AT1G18700	A0A1P8AM23	DNAJ heat shock N-terminal domain-containing protein	ER	UNKNOWN	UNKNOWN	ER	UNKNOWN	0	0	0	0.88095	0.00668	0.00133	0.94402	0.00176	0.01624	0.00414	0.00436	0.00626	0.00322	0.00342	0.00629	0.00227
Q9M9U3	AT1G18720	Q9M9U3	At1g18720/F6A14_17	ER	UNKNOWN	UNKNOWN	ER	UNKNOWN	0	0	0	0.75	0.00417	0.00175	0.94461	0.00136	0.01291	0.00758	0.00273	0.00332	0.00626	0.00333	0.00625	0.00571
Q9M9U5	AT1G18740	B1L	Protein BYPASS1-LIKE	VACUOLE+CYTOSOL	UNKNOWN	UNKNOWN	VACUOLE	CYTOSOL	0	0.48019	0	0.5	0.00158	0.38369	0.01463	0.03554	0.02697	0.00422	0.00263	0.00425	0.02506	0.00364	0.02452	0.47327
Q8LC68	AT1G18800	NRP2	NAP1-related protein 2	NUCLEUS+CYTOSOL	UNKNOWN	UNKNOWN	NUCLEUS	CYTOSOL	0	0.02872	0	1	0.00333	0.23769	0.00149	0.02278	0.00168	0.00949	0.69119	0.00805	0.00588	0.00177	0.01153	0.0051
Q501D2	AT1G18840	IQD30	Protein IQ-DOMAIN 30	PM	UNKNOWN	UNKNOWN	PM	UNKNOWN	0	0	0	1	0.00135	0.04831	0.00209	0.00764	0.0011	0.00204	0.0033	0.00266	0.87718	0.0033	0.01251	0.03853
Q9M9V4	AT1G18850	PCP2	F6A14.6 protein	NUCLEUS	NUCLEUS	NUCLEUS	NUCLEUS	UNKNOWN	0	0	0	1	0.00166	0.0014	0.00076	0.00105	0.00106	0.00144	0.9866	0.00155	0.00089	0.00071	0.00149	0.00139
Q9M9V8	AT1G18890	CPK10	Calcium-dependent protein kinase 10	PM	UNKNOWN	UNKNOWN	PM	UNKNOWN	0	0	0	1	0.0021	0.00172	0.01036	0.01368	0.00187	0.00183	0.00381	0.00242	0.9422	0.00896	0.00242	0.00863
A0A1P8ARG8	AT1G18950	A0A1P8ARG8	DDT domain superfamily	NUCLEUS	UNKNOWN	UNKNOWN	NUCLEUS	UNKNOWN	0	0	0	0.58333	0.00329	0.00098	0.00138	0.00246	0.00174	0.00373	0.96794	0.00355	0.00089	0.00071	0.01247	0.00086
Q8VYY6	AT1G19020	Q8VYY6	CDP-diacylglycerol-glycerol-3-phosphate 3-phosphatidyltransferase	?VACUOLE+PM+unknown	UNKNOWN	UNKNOWN	UNKNOWN	UNKNOWN	0.51974	0.51974	0.01809	1	0.00699	0.00719	0.02815	0.00968	0.01546	0.00488	0.00431	0.08342	0.24488	0.00899	0.19285	0.39321
Q8L798	AT1G19110	Q8L798	Inter-alpha-trypsin inhibitor heavy chain-like protein	PM	PM	PM	PM	UNKNOWN	0	0	0	1	0.0022	0.00177	0.03421	0.00784	0.00991	0.00203	0.0026	0.00253	0.92285	0.00533	0.00294	0.00578
Q8GYZ3	AT1G19130	Q8GYZ3	RmlC-like jelly roll fold protein	CYTOSOL	UNKNOWN	UNKNOWN	CYTOSOL	UNKNOWN	0	0	0	0.9881	0.00105	0.93781	0.00724	0.00735	0.00493	0.00228	0.00134	0.00108	0.0079	0.01041	0.00261	0.016
F4IE14	AT1G19140	COQ9	Ubiquinone biosynthesis protein	MITOCHONDRION	UNKNOWN	UNKNOWN	MITOCHONDRION	UNKNOWN	0	0	0	0.7381	0.00387	0.00084	0.0018	0.00267	0.00272	0.9779	0.00213	0.00232	0.00104	0.00148	0.00202	0.0012
F4IE17	AT1G19170	F4IE17	Pectin lyase-like superfamily protein	GOLGI+NUCLEUS	UNKNOWN	UNKNOWN	GOLGI	NUCLEUS	0	0.20176	0	1	0.00337	0.00134	0.00618	0.00969	0.62923	0.00458	0.33068	0.00392	0.00153	0.0044	0.00355	0.00155
Q9LMA2	AT1G19240	Q9LMA2	T29M8.11	MITOCHONDRION	UNKNOWN	UNKNOWN	MITOCHONDRION	UNKNOWN	0	0	0	0.86905	0.01017	0.00659	0.0014	0.02905	0.00302	0.93792	0.00288	0.00225	0.0013	0.00115	0.00364	0.00062
Q9LN67	AT1G19310	Q9LN67	E3 ubiquitin-protein ligase RMA	ER	UNKNOWN	UNKNOWN	ER	UNKNOWN	0	0	0	0.72619	0.00359	0.00705	0.85894	0.0244	0.02194	0.00265	0.00524	0.00161	0.0594	0.00697	0.00285	0.00535
Q9LN62	AT1G19360	RRA3	Arabinosyltransferase RRA3	GOLGI	GOLGI	GOLGI MEDIAL	GOLGI	UNKNOWN	0	0	0	1	0.00211	0.00046	0.00386	0.00239	0.97554	0.00305	0.00218	0.0038	0.00094	0.00242	0.00219	0.00105
Q9LN61	AT1G19370	Q9LN61	F18O14.9	ER	ER	ER	ER	UNKNOWN	0	0	0	1	0.0033	0.00087	0.96339	0.00211	0.00975	0.00156	0.00225	0.00181	0.00522	0.00587	0.00186	0.00203
Q9LN60	AT1G19380	Q9LN60	At1g19380	GOLGI	UNKNOWN	UNKNOWN	GOLGI	UNKNOWN	0	0	0	1	0.00315	0.00086	0.00275	0.00438	0.97187	0.00244	0.00184	0.00279	0.00083	0.00196	0.00608	0.00107
Q9LN50	AT1G19430	Q9LN50	Probable methyltransferase PMT28	GOLGI	GOLGI	GOLGI TRANS	GOLGI	UNKNOWN	0	0	0	1	0.001	0.00177	0.00731	0.00342	0.96338	0.00137	0.00261	0.00153	0.00348	0.00818	0.00291	0.00304
Q9LN49	AT1G19440	KCS4	3-ketoacyl-CoA synthase 4	ER	UNKNOWN	UNKNOWN	ER	UNKNOWN	0	0	0	1	0.00346	0.00137	0.92945	0.00435	0.00781	0.00172	0.01429	0.00369	0.02049	0.00807	0.00343	0.00187
Q93YP9	AT1G19450	Q93YP9	Sugar transporter ERD6-like 4	VACUOLE	UNKNOWN	UNKNOWN	VACUOLE	UNKNOWN	0	0	0	0.61905	0.00157	0.00162	0.00433	0.00365	0.00237	0.01028	0.00263	0.00486	0.03555	0.00181	0.00133	0.92998
F4HP69	AT1G19485	F4HP69	Transducin/WD40 repeat-like superfamily protein	NUCLEUS+CYTOSOL+unknown?	UNKNOWN	UNKNOWN	NUCLEUS	CYTOSOL	0.00054	0.32501	0.00054	0.63095	0.00251	0.2634	0.00315	0.02414	0.00447	0.0044	0.52703	0.0038	0.01344	0.00524	0.1369	0.0115
Q8LEZ4	AT1G19520	NFD5	Small ribosomal subunit protein mS77	MITOCHONDRION	MITOCHONDRION	UNKNOWN	MITOCHONDRION	UNKNOWN	0	0	0	1	0.003	0.00174	0.00105	0.00549	0.00222	0.95511	0.02087	0.00638	0.00105	0.00081	0.00138	0.00089
Q940Z1	AT1G19525	Q940Z1	Pentatricopeptide repeat-containing protein At1g19525	MITOCHONDRION	UNKNOWN	UNKNOWN	MITOCHONDRION	UNKNOWN	0	0	0	1	0.00334	0.0019	0.00106	0.00475	0.00187	0.96399	0.00884	0.00983	0.00109	0.00101	0.00142	0.0009
Q93WK6	AT1G19530	Q93WK6	DNA polymerase epsilon catalytic subunit A	PM	UNKNOWN	UNKNOWN	PM	UNKNOWN	0	0	0	0.97619	0.00264	0.01138	0.00111	0.00172	0.00248	0.00293	0.0056	0.00213	0.88008	0.00253	0.0045	0.08289
A0A1P8APG5	AT1G19540	A0A1P8APG5	NmrA-like negative transcriptional regulator family protein	CYTOSOL	UNKNOWN	UNKNOWN	CYTOSOL	UNKNOWN	0	0	0	0.61905	0.00176	0.93354	0.00314	0.02057	0.0024	0.00199	0.00322	0.00162	0.01037	0.00504	0.00382	0.01252
Q9FWR4	AT1G19570	DHAR1	Glutathione S-transferase DHAR1, mitochondrial	CYTOSOL	UNKNOWN	UNKNOWN	CYTOSOL	UNKNOWN	0	0	0	1	0.00104	0.96732	0.00312	0.00295	0.00275	0.00176	0.00232	0.00191	0.0046	0.00337	0.00356	0.00528
Q9FWR5	AT1G19580	GAMMACA1	Gamma carbonic anhydrase 1, mitochondrial	MITOCHONDRION	MITOCHONDRION	MIM	MITOCHONDRION	UNKNOWN	0	0	0	1	0.00161	0.00103	0.002	0.00254	0.00229	0.98243	0.00149	0.00138	0.00141	0.00127	0.00153	0.00102
Q9LN35	AT1G19600	Q9LN35	At1g19600	CYTOSOL+UNKNOWN+mitochondrion?	UNKNOWN	UNKNOWN	CYTOSOL	UNKNOWN	0	0.54743	0	0.7619	0.01427	0.40823	0.0038	0.01225	0.00253	0.11278	0.00592	0.07649	0.00558	0.00412	0.33953	0.0145
Q147R9	AT1G19690	Q147R9	At1g19690	CHLOROPLAST	UNKNOWN	PLASTID STROMA	CHLOROPLAST	UNKNOWN	0	0	0	1	0.97887	0.00139	0.0008	0.00167	0.00067	0.00108	0.0093	0.00245	0.00072	0.00042	0.00189	0.00076
Q67Z55	AT1G19710	Q67Z55	At1g19710	GOLGI	GOLGI	UNKNOWN	GOLGI	UNKNOWN	0	0	0	1	0.00106	0.00123	0.00335	0.00333	0.97666	0.00134	0.00233	0.00135	0.00173	0.00361	0.00239	0.00162
Q39239	AT1G19730	TRX4	Thioredoxin H4	EXTRACELLULAR+CYTOSOL	UNKNOWN	UNKNOWN	EXTRACELLULAR	CYTOSOL	0	0.49196	0	0.5	0.00411	0.38621	0.01582	0.45224	0.0491	0.00541	0.00399	0.0036	0.01121	0.01659	0.04623	0.00549
Q9FXH3	AT1G19740	LCP1	ATP-dependent protease La	CHLOROPLAST	UNKNOWN	UNKNOWN	CHLOROPLAST	UNKNOWN	0	0	0	0.7381	0.98165	0.00067	0.00104	0.0013	0.00121	0.00137	0.00841	0.0011	0.00068	0.00063	0.00124	0.0007
Q9FXH5	AT1G19770	PUP14	Purine permease 14	PM+tgn	UNKNOWN	UNKNOWN	PM	UNKNOWN	0.00044	0.00044	0	1	0.00232	0.00311	0.05222	0.0091	0.02366	0.0034	0.00383	0.00401	0.72197	0.16411	0.00322	0.00906
Q8L4R0	AT1G19800	TGD1	Protein TRIGALACTOSYLDIACYLGLYCEROL 1, chloroplastic	CHLOROPLAST	UNKNOWN	PLASTID MEMBRANE	CHLOROPLAST	UNKNOWN	0	0	0	0.97619	0.88817	0.00133	0.01578	0.0026	0.00195	0.00159	0.00287	0.05626	0.00527	0.00212	0.01945	0.00261
Q0WSY2	AT1G19835	FPP4	Filament-like plant protein 4	PM	UNKNOWN	UNKNOWN	PM	UNKNOWN	0	0	0	1	0.00189	0.035	0.00291	0.01782	0.00092	0.002	0.02073	0.00576	0.89477	0.00233	0.00905	0.00683
Q9FXI5	AT1G19870	IQD32	Protein IQ-DOMAIN 32	PM	UNKNOWN	UNKNOWN	PM	UNKNOWN	0	0	0	1	0.00135	0.00272	0.00502	0.00376	0.00248	0.00159	0.00363	0.00184	0.94706	0.01893	0.00177	0.00985
F4HQZ1	AT1G19880	F4HQZ1	Regulator of chromosome condensation	NUCLEUS	UNKNOWN	UNKNOWN	NUCLEUS	UNKNOWN	0	0	0	1	0.00199	0.00212	0.00091	0.00335	0.00116	0.0021	0.98189	0.00196	0.0012	0.0008	0.00148	0.00104
Q43870	AT1G19920	APS2	ATP sulfurylase 2	CHLOROPLAST+CYTOSOL	UNKNOWN	UNKNOWN	CHLOROPLAST	CYTOSOL	0	0.38829	0	1	0.55675	0.39972	0.00462	0.00774	0.00265	0.00316	0.00285	0.00412	0.00492	0.002	0.00443	0.00703
Q9FXI9	AT1G19940	Q9FXI9	Endoglucanase 2	?PM+NUCLEUS+er	UNKNOWN	UNKNOWN	UNKNOWN	UNKNOWN	0.56936	0.56936	0.00509	0.88095	0.01214	0.00306	0.17648	0.01441	0.00185	0.00325	0.33273	0.04334	0.37355	0.01079	0.02485	0.00355
Q8LEM6	AT1G19950	HVA22H	HVA22-like protein h	PM	UNKNOWN	UNKNOWN	PM	UNKNOWN	0	0	0	1	0.01096	0.00101	0.06776	0.0056	0.00443	0.00318	0.00253	0.00745	0.88348	0.00381	0.00636	0.00344
A0A1P8AWL9	AT1G19970	A0A1P8AWL9	ER lumen protein retaining receptor family protein	GOLGI+ER+vacuole?	UNKNOWN	UNKNOWN	GOLGI	ER	0	0.25862	0	0.88095	0.00407	0.03205	0.21948	0.00599	0.50933	0.00728	0.00202	0.00219	0.06388	0.02701	0.00457	0.12213
F4HR02	AT1G19990	F4HR02	Nucleolin	NUCLEUS	UNKNOWN	UNKNOWN	NUCLEUS	UNKNOWN	0	0	0	0.7619	0.00283	0.00141	0.00081	0.00129	0.0011	0.00268	0.98218	0.00141	0.00079	0.0008	0.00373	0.00097
Q8W493	AT1G20020	LFNR2	Ferredoxin--NADP reductase, leaf isozyme 2, chloroplastic	CHLOROPLAST	CHLOROPLAST	PLASTID MEMBRANE	CHLOROPLAST	UNKNOWN	0	0	0	1	0.98588	0.00106	0.0008	0.00156	0.00062	0.00117	0.00388	0.00202	0.00067	0.00041	0.00124	0.00068
O48962	AT1G20050	O48962	Probable 3-beta-hydroxysteroid-Delta(8),Delta(7)-isomerase	ER	UNKNOWN	UNKNOWN	ER	UNKNOWN	0	0	0	1	0.00222	0.00165	0.96287	0.00272	0.01067	0.00179	0.00218	0.00117	0.00385	0.00577	0.00242	0.00269
Q38919	AT1G20090	ARAC4	Rac-like GTP-binding protein ARAC4	PM	UNKNOWN	UNKNOWN	PM	UNKNOWN	0	0	0	0.9881	0.00243	0.0039	0.00541	0.01766	0.00268	0.00234	0.00246	0.00238	0.93468	0.00469	0.00169	0.01968
Q9ASS2	AT1G20110	FREE1	Protein FREE1	?CYTOSOL+NUCLEUS+PM	UNKNOWN	UNKNOWN	UNKNOWN	UNKNOWN	0.31062	0.31062	0.00609	1	0.00236	0.50712	0.00208	0.0095	0.00201	0.00564	0.21821	0.00579	0.20256	0.00221	0.00468	0.03783
Q9LNT9	AT1G20140	ASK4	SKP1-like protein 4	CYTOSOL+NUCLEUS	UNKNOWN	UNKNOWN	CYTOSOL	NUCLEUS	0	0.12519	0	1	0.00173	0.65607	0.00228	0.00733	0.0025	0.00385	0.28951	0.00476	0.01708	0.00351	0.00528	0.00609
Q9LNU4	AT1G20200	RPN3A	26S proteasome non-ATPase regulatory subunit 3 homolog A	CYTOSOL	UNKNOWN	UNKNOWN	CYTOSOL	UNKNOWN	0	0	0	1	0.00143	0.95802	0.00094	0.00787	0.00145	0.00169	0.01114	0.00216	0.00379	0.00212	0.0028	0.00658
Q944A2	AT1G20220	ATALBA2	Alba DNA/RNA-binding protein	CYTOSOL+nucleus	UNKNOWN	UNKNOWN	CYTOSOL	UNKNOWN	0.00012	0.00012	0	1	0.00228	0.78942	0.00115	0.00723	0.00182	0.00372	0.16715	0.00803	0.00487	0.00283	0.00474	0.00674
Q8W456	AT1G20225	T20H2.2	Thioredoxin superfamily protein	EXTRACELLULAR+nucleus?	UNKNOWN	UNKNOWN	EXTRACELLULAR	UNKNOWN	0	0	0	1	0.00354	0.01238	0.00344	0.8381	0.00454	0.00998	0.1003	0.00825	0.00666	0.00517	0.00513	0.0025
Q9LNU6	AT1G20230	PCMP-H21	Pentatricopeptide repeat-containing protein At1g20230	MITOCHONDRION	UNKNOWN	UNKNOWN	MITOCHONDRION	UNKNOWN	0	0	0	1	0.0038	0.00103	0.00204	0.00178	0.00201	0.9774	0.00237	0.00274	0.00142	0.00116	0.00322	0.00102
Q8W4E2	AT1G20260	VHA-B3	V-type proton ATPase subunit B3	VACUOLE	UNKNOWN	UNKNOWN	VACUOLE	UNKNOWN	0	0	0	1	0.00177	0.00156	0.00918	0.00283	0.00317	0.00214	0.0024	0.00274	0.01616	0.00471	0.00334	0.95001
Q9LN20	AT1G20270	P4H3	Probable prolyl 4-hydroxylase 3	GOLGI+ER	GOLGI	GOLGI CIS	GOLGI	ER	0	0.48375	0	1	0.00422	0.00224	0.4422	0.01023	0.4811	0.00382	0.00325	0.00183	0.01013	0.02984	0.0036	0.00754
Q9LN22	AT1G20300	Q9LN22	Pentatricopeptide repeat-containing protein At1g20300, mitochondrial	MITOCHONDRION	UNKNOWN	UNKNOWN	MITOCHONDRION	UNKNOWN	0	0	0	0.88095	0.00287	0.00118	0.00132	0.00315	0.00342	0.96369	0.00873	0.00922	0.00096	0.00106	0.00358	0.00082
Q39227	AT1G20330	SMT2	24-methylenesterol C-methyltransferase 2	ER	ER	ER	ER	UNKNOWN	0	0	0	1	0.00228	0.00208	0.94694	0.0036	0.00742	0.00191	0.00164	0.00131	0.01802	0.0051	0.00198	0.00772
P42699	AT1G20340	DRT112	Plastocyanin major isoform, chloroplastic	CHLOROPLAST	UNKNOWN	PLASTID MEMBRANE	CHLOROPLAST	UNKNOWN	0	0	0	0.9881	0.98179	0.00084	0.00101	0.00195	0.00157	0.00538	0.00242	0.00175	0.00058	0.00047	0.00156	0.00067
Q9LN27	AT1G20350	TIM17-1	Mitochondrial import inner membrane translocase subunit TIM17-1	MITOCHONDRION	UNKNOWN	MIM	MITOCHONDRION	UNKNOWN	0	0	0	0.61905	0.00208	0.00264	0.00139	0.01039	0.00153	0.95307	0.01466	0.00631	0.00155	0.00096	0.00425	0.00117
Q9LN29	AT1G20370	Q9LN29	F14O10.3 protein	?NUCLEUS+CYTOSOL+extracellular?	UNKNOWN	UNKNOWN	UNKNOWN	UNKNOWN	0.29532	0.29532	0.00449	1	0.00373	0.26105	0.00286	0.14257	0.00442	0.0125	0.5312	0.00882	0.0128	0.00509	0.00644	0.00851
F4HSS8	AT1G20410	F4HSS8	tRNA pseudouridine(55) synthase	EXTRACELLULAR	UNKNOWN	UNKNOWN	EXTRACELLULAR	UNKNOWN	0	0	0	0.97619	0.00394	0.01412	0.00332	0.87441	0.00336	0.01069	0.06454	0.00626	0.0062	0.00418	0.00546	0.00352
Q94B54	AT1G20430	Q94B54	Uncharacterized protein	MITOCHONDRION	MITOCHONDRION	UNKNOWN	MITOCHONDRION	UNKNOWN	0	0	0	1	0.00148	0.00116	0.00316	0.00224	0.00217	0.97984	0.00108	0.00168	0.00222	0.00167	0.00175	0.00155
P31168	AT1G20440	COR47	Dehydrin COR47	PM+CYTOSOL	UNKNOWN	UNKNOWN	PM	CYTOSOL	0	0.19706	0	1	0.00138	0.31607	0.00266	0.00651	0.00253	0.00394	0.00357	0.00197	0.60004	0.00403	0.00387	0.05344
P42759	AT1G20450	ERD10	Dehydrin ERD10	CYTOSOL+PM	UNKNOWN	CYTOSOL	CYTOSOL	PM	0	0.23569	0	1	0.0013	0.5974	0.00491	0.00467	0.00255	0.00385	0.00228	0.00216	0.33707	0.00495	0.00413	0.03472
Q84P25	AT1G20480	4CLL2	4-coumarate--CoA ligase-like 2	PEROXISOME	PEROXISOME	PEROXISOME	PEROXISOME	UNKNOWN	0	0	0	1	0.00597	0.00192	0.0046	0.00376	0.0037	0.00391	0.00582	0.95696	0.00209	0.00287	0.00594	0.00245
Q84P21	AT1G20510	4CLL5	Peroxisomal OPC-8:0-CoA ligase 1	PEROXISOME	UNKNOWN	PEROXISOME	PEROXISOME	UNKNOWN	0	0	0	1	0.03975	0.00141	0.00321	0.00415	0.0018	0.00546	0.02032	0.91522	0.00153	0.00231	0.00359	0.00124
Q8RWD8	AT1G20540	Q8RWD8	Transducin/WD40 repeat-like superfamily protein	CYTOSOL+extracellular	UNKNOWN	UNKNOWN	CYTOSOL	EXTRACELLULAR	0	0.0038	0	1	0.00366	0.73809	0.00287	0.19987	0.00491	0.00425	0.00669	0.00629	0.00849	0.00389	0.00995	0.01105
F4HSU3	AT1G20550	OFUT6	O-fucosyltransferase 6	GOLGI+ER	UNKNOWN	UNKNOWN	GOLGI	ER	0	0.0436	0	1	0.00483	0.00279	0.2418	0.00428	0.66107	0.00506	0.00332	0.00169	0.03349	0.02098	0.00742	0.01326
F4HUK6	AT1G20560	AAE1	Butanoate--CoA ligase AAE1	PEROXISOME	PEROXISOME	PEROXISOME	PEROXISOME	UNKNOWN	0	0	0	1	0.00475	0.00259	0.00552	0.00371	0.00339	0.00248	0.00622	0.95251	0.00309	0.00287	0.0098	0.00307
Q9LM93	AT1G20575	DPMS1	Dolichol-phosphate mannosyltransferase subunit 1	ER	ER	ER	ER	UNKNOWN	0	0	0	1	0.00189	0.00141	0.96263	0.00456	0.00338	0.00128	0.00193	0.00141	0.00879	0.0074	0.00193	0.00338
Q9LM92	AT1G20580	SMD3B	Small nuclear ribonucleoprotein SmD3b	NUCLEUS	UNKNOWN	UNKNOWN	NUCLEUS	UNKNOWN	0	0	0	0.9881	0.00146	0.01415	0.00129	0.00644	0.00132	0.00259	0.96151	0.00242	0.00265	0.00146	0.002	0.0027
B9DG18	AT1G20620	CAT3	catalase	PEROXISOME+cytosol?	UNKNOWN	UNKNOWN	PEROXISOME	UNKNOWN	0	0	0	1	0.00123	0.10884	0.0017	0.00407	0.00102	0.00492	0.00594	0.83368	0.00712	0.00363	0.00757	0.02027
Q96528	AT1G20630	CAT1	Catalase-1	PEROXISOME	PEROXISOME	PEROXISOME	PEROXISOME	UNKNOWN	0	0	0	1	0.0012	0.00218	0.00397	0.00347	0.00228	0.00161	0.00561	0.96346	0.00329	0.00555	0.00475	0.00261
Q9LDZ5	AT1G20650	PBL21	Probable serine/threonine-protein kinase PBL21	?PEROXISOME+EXTRACELLULAR+cytosol	UNKNOWN	UNKNOWN	UNKNOWN	UNKNOWN	0.32769	0.32769	0.00963	0.5	0.0173	0.17047	0.00208	0.2449	0.00115	0.00509	0.03813	0.483	0.01269	0.00586	0.00934	0.00998
Q9LM78	AT1G20760	ATEH1	Calcium-binding EF hand family protein	CYTOSOL+PM	UNKNOWN	UNKNOWN	CYTOSOL	PM	0	0.44561	0	1	0.00188	0.51664	0.00151	0.00809	0.00114	0.00399	0.01175	0.00336	0.42028	0.00264	0.00606	0.02267
Q9LM77	AT1G20770	Q9LM77	At1g20770	ER	UNKNOWN	UNKNOWN	ER	UNKNOWN	0	0	0	1	0.00221	0.00122	0.96546	0.00235	0.00592	0.00213	0.00142	0.00108	0.00716	0.00497	0.00192	0.00417
Q9LM76	AT1G20780	PUB44	U-box domain-containing protein 44	PM	PM	PM	PM	UNKNOWN	0	0	0	1	0.00304	0.00185	0.00399	0.00229	0.00353	0.00153	0.00156	0.00168	0.95555	0.00515	0.00246	0.01738
Q9LM71	AT1G20810	FKBP18	Peptidyl-prolyl cis-trans isomerase FKBP18, chloroplastic	CHLOROPLAST	UNKNOWN	PLASTID MEMBRANE	CHLOROPLAST	UNKNOWN	0	0	0	0.7381	0.9852	0.00058	0.00169	0.00127	0.00102	0.00091	0.00235	0.00153	0.00107	0.0014	0.00168	0.00131
Q6ID99	AT1G20816	OEP21A	Outer envelope pore protein 21A, chloroplastic	CHLOROPLAST	UNKNOWN	UNKNOWN	CHLOROPLAST	UNKNOWN	0	0	0	1	0.7872	0.00267	0.04073	0.00469	0.02799	0.00089	0.00408	0.04546	0.00783	0.00258	0.07235	0.00352
Q9LM69	AT1G20823	ATL80	RING-H2 finger protein ATL80	?PM+extracellular+er?+tgn?	UNKNOWN	UNKNOWN	UNKNOWN	UNKNOWN	0.46714	0.46714	0.05778	0.92857	0.00415	0.01405	0.12831	0.19355	0.03138	0.00517	0.00354	0.0054	0.44185	0.11633	0.00279	0.05348
A0A1P8AQD4	AT1G20830	MCD1	Multiple chloroplast division site 1	CHLOROPLAST	UNKNOWN	PLASTID MEMBRANE	CHLOROPLAST	UNKNOWN	0	0	0	0.72619	0.97182	0.00133	0.00158	0.00243	0.00133	0.00072	0.01215	0.00126	0.00114	0.00103	0.00421	0.00101
Q96290	AT1G20840	MSSP1	Monosaccharide-sensing protein 1	VACUOLE	UNKNOWN	UNKNOWN	VACUOLE	UNKNOWN	0	0	0	0.59524	0.00115	0.00209	0.00213	0.00122	0.00186	0.00273	0.00333	0.00221	0.00311	0.00184	0.00154	0.97677
Q9LM66	AT1G20850	XCP2	Cysteine protease XCP2	NUCLEUS	UNKNOWN	UNKNOWN	NUCLEUS	UNKNOWN	0	0	0	1	0.00194	0.00086	0.00333	0.0013	0.00274	0.00156	0.97794	0.00222	0.00164	0.00358	0.00181	0.00108
A0A1P8ANJ5	AT1G20890	A0A1P8ANJ5	Caveolin-1 protein	ER	UNKNOWN	UNKNOWN	ER	UNKNOWN	0	0	0	0.84524	0.0053	0.0027	0.93444	0.00641	0.0139	0.00477	0.00405	0.00861	0.00198	0.00338	0.01157	0.00289
C0SUW7	AT1G20910	ARID6	AT-rich interactive domain-containing protein 6	NUCLEUS	UNKNOWN	UNKNOWN	NUCLEUS	UNKNOWN	0	0	0	0.67857	0.0023	0.00142	0.00097	0.00137	0.00069	0.00249	0.98046	0.00301	0.00134	0.00087	0.00196	0.00311
Q8H0U8	AT1G20920	RH42	DEAD-box ATP-dependent RNA helicase 42	NUCLEUS	NUCLEUS	NUCLEUS	NUCLEUS	UNKNOWN	0	0	0	1	0.00201	0.00119	0.00096	0.00241	0.0014	0.00166	0.98403	0.00211	0.00103	0.001	0.00134	0.00086
Q9SYP2	AT1G20950	PFP-ALPHA1	Pyrophosphate--fructose 6-phosphate 1-phosphotransferase subunit alpha 1	CYTOSOL+NUCLEUS	UNKNOWN	UNKNOWN	CYTOSOL	NUCLEUS	0	0.15672	0	1	0.002	0.6491	0.00124	0.00318	0.00224	0.00494	0.3107	0.00542	0.00539	0.0031	0.00498	0.00771
Q9SYP1	AT1G20960	BRR2A	DExH-box ATP-dependent RNA helicase DExH12	NUCLEUS	NUCLEUS	NUCLEUS	NUCLEUS	UNKNOWN	0	0	0	1	0.00185	0.00147	0.00101	0.00342	0.00173	0.00187	0.98216	0.00177	0.00122	0.00107	0.00133	0.0011
F4HWC3	AT1G20970	F4HWC3	Calponin-like domain protein	PM+extracellular?	UNKNOWN	UNKNOWN	PM	EXTRACELLULAR	0	0.00117	0	1	0.00514	0.08748	0.08016	0.11803	0.0152	0.00637	0.01397	0.00578	0.6522	0.00341	0.00695	0.00532
Q9LPU1	AT1G21065	T22I11.11	Secondary thiamine-phosphate synthase enzyme	NUCLEUS+chloroplast?+unknown?	UNKNOWN	UNKNOWN	NUCLEUS	CHLOROPLAST	2e-05	0.00305	2e-05	0.60714	0.14699	0.00598	0.00393	0.01768	0.00318	0.00177	0.691	0.00465	0.00323	0.00189	0.11867	0.00102
Q9LPU3	AT1G21080	Q9LPU3	DNAJ heat shock N-terminal domain-containing protein	CYTOSOL	UNKNOWN	UNKNOWN	CYTOSOL	UNKNOWN	0	0	0	1	0.00206	0.85425	0.01678	0.03291	0.01561	0.00351	0.00194	0.00326	0.04395	0.00901	0.00332	0.01338
A0A1P8AUJ8	AT1G21150	MTERF27	Mitochondrial transcription termination factor family protein	MITOCHONDRION	UNKNOWN	UNKNOWN	MITOCHONDRION	UNKNOWN	0	0	0	0.75	0.00259	0.0008	0.00295	0.00214	0.00205	0.97649	0.00199	0.00508	0.00168	0.0017	0.00155	0.00096
C0SUW8	AT1G21160	C0SUW8	Eukaryotic translation initiation factor 5B	?PM+cytosol?+vacuole?	UNKNOWN	UNKNOWN	UNKNOWN	UNKNOWN	0.10991	0.10991	0.00377	1	0.00233	0.13373	0.01558	0.07739	0.01465	0.00457	0.0978	0.00333	0.47658	0.00468	0.03606	0.1333
F4HWE6	AT1G21170	SEC5B	Exocyst complex component SEC5B	VACUOLE+unknown?	UNKNOWN	UNKNOWN	VACUOLE	UNKNOWN	0	0.00697	0	0.5119	0.00332	0.0111	0.01938	0.02411	0.00996	0.00447	0.00941	0.04106	0.03996	0.0043	0.13485	0.69808
Q9LMN4	AT1G21190	LSM3A	Sm-like protein LSM3A	NUCLEUS+CYTOSOL	UNKNOWN	UNKNOWN	NUCLEUS	CYTOSOL	0	0.10983	0	0.60714	0.00228	0.26454	0.00256	0.04152	0.00324	0.00753	0.64587	0.00678	0.00979	0.00345	0.00501	0.00744
F4HXZ8	AT1G21370	F4HXZ8	Transmembrane protein	GOLGI	GOLGI	GOLGI TRANS	GOLGI	UNKNOWN	0	0	0	1	0.00149	0.00108	0.01065	0.00194	0.96352	0.00233	0.00175	0.00232	0.00361	0.0046	0.00308	0.00362
Q9LPL6	AT1G21380	TOL3	TOM1-like protein 3	PM+CYTOSOL	UNKNOWN	UNKNOWN	PM	CYTOSOL	0	0.39318	0	1	0.0026	0.3852	0.0186	0.02338	0.00466	0.00501	0.00329	0.00412	0.53379	0.00634	0.00492	0.00808
Q501F7	AT1G21440	Q501F7	At1g21440	CHLOROPLAST	CHLOROPLAST	PLASTID STROMA	CHLOROPLAST	UNKNOWN	0	0	0	1	0.98692	0.00097	0.00106	0.00161	0.00094	0.00121	0.00246	0.00113	0.00075	0.00056	0.00146	0.00094
F4HY10	AT1G21480	F4HY10	Exostosin family protein	GOLGI	GOLGI	GOLGI MEDIAL	GOLGI	UNKNOWN	0	0	0	1	0.00141	0.00112	0.00336	0.00398	0.9737	0.00184	0.00248	0.00274	0.0013	0.00219	0.00414	0.00174
Q9LPK9	AT1G21500	Q9LPK9	F24J8.11 protein	CHLOROPLAST	CHLOROPLAST	UNKNOWN	CHLOROPLAST	UNKNOWN	0	0	0	1	0.98824	0.00072	0.00107	0.00122	0.00091	0.00098	0.0016	0.00176	0.00083	0.00072	0.00111	0.00084
Q8GYE6	AT1G21520	Q8GYE6	Uncharacterized protein At1g21520	PM	UNKNOWN	UNKNOWN	PM	UNKNOWN	0	0	0	0.9881	0.00165	0.00558	0.00875	0.00503	0.00918	0.00225	0.00554	0.00205	0.91219	0.03808	0.00435	0.00535
Q9XI19	AT1G21600	PTAC6	PLASTID TRANSCRIPTIONALLY ACTIVE protein 6, chloroplastic	CHLOROPLAST	CHLOROPLAST	UNKNOWN	CHLOROPLAST	UNKNOWN	0	0	0	0.86905	0.95114	0.00208	0.00119	0.0084	0.00119	0.00104	0.02913	0.00195	0.0011	0.00053	0.0016	0.00065
F4HY30	AT1G21610	UBN1	Wound-responsive family protein	NUCLEUS+UNKNOWN	UNKNOWN	UNKNOWN	NUCLEUS	UNKNOWN	0	0.22598	0	0.53571	0.00421	0.00343	0.00387	0.02213	0.01423	0.03468	0.61374	0.00978	0.00253	0.00264	0.28687	0.00189
F4HY32	AT1G21630	ATEH2	Calcium-binding EF hand family protein	?PM+CYTOSOL+nucleus	UNKNOWN	UNKNOWN	UNKNOWN	UNKNOWN	0.20711	0.20711	0.01074	0.60714	0.00337	0.20226	0.00161	0.0067	0.00188	0.00557	0.18869	0.00687	0.5371	0.00378	0.00557	0.03659
Q9C5W3	AT1G21640	NADK2	NAD kinase 2, chloroplastic	CHLOROPLAST	UNKNOWN	PLASTID STROMA	CHLOROPLAST	UNKNOWN	0	0	0	0.7381	0.97131	0.0013	0.00198	0.00306	0.00137	0.00098	0.00573	0.00181	0.00096	0.00079	0.01019	0.00051
F4HY36	AT1G21650	SECA2	Protein translocase subunit SecA	CHLOROPLAST	UNKNOWN	PLASTID STROMA	CHLOROPLAST	UNKNOWN	0	0	0	1	0.88439	0.00896	0.00369	0.02189	0.00157	0.00086	0.01105	0.0295	0.00361	0.0013	0.03175	0.00144
Q9XI12	AT1G21660	AUXILIN-LIKE3	At1g21660	CYTOSOL+NUCLEUS	UNKNOWN	UNKNOWN	CYTOSOL	NUCLEUS	0	0.39532	0	1	0.00147	0.54735	0.00102	0.00188	0.00143	0.00381	0.37181	0.00393	0.02312	0.0016	0.01098	0.0316
Q9XI10	AT1G21680	Q9XI10	DPP6 N-terminal domain-like protein	EXTRACELLULAR+cytosol	UNKNOWN	EXTRACELLULAR	EXTRACELLULAR	UNKNOWN	0.00016	0.00016	0	1	0.00334	0.16956	0.00362	0.76732	0.00646	0.00796	0.00698	0.00555	0.00909	0.00638	0.00516	0.00859
Q93ZX1	AT1G21690	RFC4	Replication factor C subunit 4	NUCLEUS	UNKNOWN	UNKNOWN	NUCLEUS	UNKNOWN	0	0	0	1	0.00128	0.00804	0.00147	0.00412	0.00133	0.00136	0.97076	0.00203	0.00257	0.00159	0.0025	0.00294
Q9XI07	AT1G21700	SWI3C	SWI/SNF complex subunit SWI3C	NUCLEUS	UNKNOWN	UNKNOWN	NUCLEUS	UNKNOWN	0	0	0	0.84524	0.00212	0.00097	0.00082	0.00111	0.00131	0.00155	0.98596	0.00219	0.00091	0.00091	0.00113	0.001
Q9XI05	AT1G21720	PBC1	Proteasome subunit beta type-3-A	CYTOSOL+vacuole?	UNKNOWN	UNKNOWN	CYTOSOL	UNKNOWN	0	0	0	1	0.00107	0.83867	0.00136	0.00922	0.0016	0.00322	0.01206	0.00166	0.0051	0.00212	0.00302	0.12089
Q8W5R6	AT1G21730	KIN7C	Kinesin-like protein KIN-7C, mitochondrial	PM+CYTOSOL	UNKNOWN	UNKNOWN	PM	CYTOSOL	0	0.09275	0	1	0.00724	0.27346	0.00336	0.01284	0.00285	0.00342	0.00682	0.00444	0.64782	0.00404	0.02808	0.00561
Q9XI01	AT1G21750	PDIL1-1	Protein disulfide isomerase-like 1-1	ER	ER	ER	ER	UNKNOWN	0	0	0	1	0.00222	0.00132	0.96002	0.00289	0.01181	0.00204	0.00148	0.00115	0.00442	0.00729	0.00197	0.00339
Q8H0Y9	AT1G21770	Q8H0Y9	Acyl-CoA N-acyltransferases	CYTOSOL	UNKNOWN	PEROXISOME	CYTOSOL	UNKNOWN	0	0	0	1	0.00366	0.81465	0.00484	0.06124	0.00473	0.00729	0.00307	0.04537	0.00605	0.00422	0.04001	0.00486
Q9XHZ8	AT1G21780	Q9XHZ8	BTB/POZ domain-containing protein At1g21780	?PM+VACUOLE+extracellular+cytosol?	UNKNOWN	UNKNOWN	UNKNOWN	UNKNOWN	0.62876	0.62876	0.03845	1	0.00291	0.13652	0.03977	0.15622	0.01816	0.0048	0.0061	0.01672	0.34006	0.00517	0.03596	0.23761
Q9XHZ7	AT1G21790	Q9XHZ7	F8K7.23	PM+ER+golgi	UNKNOWN	UNKNOWN	PM	ER	0.00091	0.3948	0.00091	0.84524	0.01032	0.00429	0.26542	0.01214	0.16687	0.00657	0.01197	0.00249	0.48481	0.01181	0.01676	0.00655
Q8RWM6	AT1G21900	Q8RWM6	Transmembrane emp24 domain-containing protein p24delta5	ER+golgi?	ER	ER	ER	UNKNOWN	2e-05	2e-05	0	1	0.004	0.00346	0.77106	0.00703	0.14989	0.0033	0.00219	0.00143	0.01442	0.02598	0.00356	0.01369
Q9SFE3	AT1G21920	MRF1	Histone H3 K4-specific methyltransferase SET7/9 family protein	CYTOSOL	UNKNOWN	UNKNOWN	CYTOSOL	UNKNOWN	0	0	0	0.61905	0.00211	0.82502	0.00596	0.05419	0.01875	0.00284	0.00348	0.0024	0.00859	0.06146	0.00537	0.00981
Q84VW7	AT1G21930	Q84VW7	At1g21930	MITOCHONDRION	UNKNOWN	UNKNOWN	MITOCHONDRION	UNKNOWN	0	0	0	0.9881	0.00118	0.00134	0.00293	0.00267	0.00335	0.9778	0.00166	0.00185	0.00187	0.00147	0.00277	0.0011
Q56YP2	AT1G21980	PIP5K1	Phosphatidylinositol 4-phosphate 5-kinase 1	CYTOSOL	UNKNOWN	UNKNOWN	CYTOSOL	UNKNOWN	0	0	0	1	0.00174	0.83657	0.00707	0.07847	0.00349	0.00313	0.00336	0.00373	0.01886	0.00402	0.00899	0.03058
F4HZS8	AT1G22060	F4HZS8	Sporulation-specific protein	CYTOSOL+peroxisome?+unknown?	UNKNOWN	UNKNOWN	CYTOSOL	PEROXISOME	3e-05	0.01275	3e-05	1	0.00178	0.66404	0.00182	0.00807	0.00146	0.03592	0.01064	0.13546	0.00582	0.00312	0.10919	0.02268
Q93Z58	AT1G22140	Q93Z58	At1g22140/F2E2_13	CYTOSOL	UNKNOWN	UNKNOWN	CYTOSOL	UNKNOWN	0	0	0	0.75	0.00211	0.87648	0.00135	0.03851	0.00195	0.00516	0.03845	0.00337	0.00462	0.00275	0.00466	0.02059
Q9LM13	AT1G22170	gpmA1	2,3-bisphosphoglycerate-dependent phosphoglycerate mutase 1	CHLOROPLAST+NUCLEUS	UNKNOWN	UNKNOWN	CHLOROPLAST	NUCLEUS	0	0.03476	0	0.75	0.68872	0.01573	0.00263	0.04596	0.0018	0.00292	0.22547	0.00481	0.00286	0.00104	0.00601	0.00206
Q9LM14	AT1G22180	Q9LM14	F16L1.9 protein	CYTOSOL+EXTRACELLULAR	UNKNOWN	UNKNOWN	CYTOSOL	EXTRACELLULAR	0	0.06958	0	1	0.00663	0.65058	0.00254	0.24151	0.00405	0.00408	0.0254	0.0071	0.01445	0.00462	0.02779	0.01123
Q9LM16	AT1G22200	Q9LM16	Endoplasmic reticulum vesicle transporter protein	ER	ER	ER	ER	UNKNOWN	0	0	0	1	0.00402	0.00159	0.90088	0.00349	0.0538	0.00252	0.00197	0.00112	0.0113	0.01137	0.00245	0.0055
Q8LFJ5	AT1G22270	TRM112A	Multifunctional methyltransferase subunit TRM112 homolog A	CYTOSOL+NUCLEUS	UNKNOWN	UNKNOWN	CYTOSOL	NUCLEUS	0	0.24899	0	1	0.00232	0.60086	0.00271	0.03981	0.00425	0.0048	0.30955	0.00623	0.01043	0.00438	0.00719	0.00747
Q9LME4	AT1G22280	Q9LME4	Probable protein phosphatase 2C 9	PM	UNKNOWN	UNKNOWN	PM	UNKNOWN	0	0	0	1	0.00181	0.00126	0.01145	0.00586	0.00232	0.0014	0.00378	0.00243	0.95294	0.00943	0.00272	0.0046
P48347	AT1G22300	GRF10	14-3-3-like protein GF14 epsilon	CYTOSOL	CYTOSOL	CYTOSOL	CYTOSOL	UNKNOWN	0	0	0	1	0.00129	0.89343	0.00858	0.00763	0.00213	0.00237	0.0044	0.00265	0.06174	0.00683	0.00341	0.00553
Q9ZWJ3	AT1G22360	UGT85A2	UDP-glycosyltransferase 85A2	CYTOSOL	UNKNOWN	UNKNOWN	CYTOSOL	UNKNOWN	0	0	0	1	0.00077	0.95527	0.00272	0.00216	0.00138	0.00134	0.00209	0.00128	0.01003	0.00275	0.00364	0.01656
Q9SK82	AT1G22400	UGT85A1	UDP-glycosyltransferase 85A1	CYTOSOL	UNKNOWN	UNKNOWN	CYTOSOL	UNKNOWN	0	0	0	0.61905	0.00081	0.96151	0.00256	0.00638	0.00294	0.00203	0.00475	0.00119	0.0033	0.00565	0.00285	0.00603
Q9SK84	AT1G22410	Q9SK84	Phospho-2-dehydro-3-deoxyheptonate aldolase	CHLOROPLAST	UNKNOWN	UNKNOWN	CHLOROPLAST	UNKNOWN	0	0	0	1	0.93724	0.00097	0.00118	0.0015	0.00094	0.00224	0.04384	0.00822	0.00108	0.00059	0.00128	0.00093
Q9SK87	AT1G22440	Q9SK87	Alcohol dehydrogenase-like 2	CYTOSOL	CYTOSOL	CYTOSOL	CYTOSOL	UNKNOWN	0	0	0	1	0.00096	0.95963	0.00342	0.00653	0.00302	0.00153	0.00532	0.00148	0.00584	0.00417	0.00417	0.00395
Q9S7L9	AT1G22450	COX6B-1	Cytochrome c oxidase subunit 6b-1	MITOCHONDRION	MITOCHONDRION	UNKNOWN	MITOCHONDRION	UNKNOWN	0	0	0	1	0.00142	0.00073	0.00306	0.00243	0.00276	0.98078	0.00129	0.00172	0.00172	0.00187	0.00106	0.00115
F4I1E4	AT1G22510	F4I1E4	E3 ubiquitin-protein ligase RNF170-like protein	ER	UNKNOWN	UNKNOWN	ER	UNKNOWN	0	0	0	1	0.00292	0.00167	0.9381	0.0026	0.01507	0.00172	0.00242	0.00112	0.01873	0.00813	0.00243	0.00509
Q8LAJ9	AT1G22520	MIC10	MICOS complex subunit MIC10	MITOCHONDRION	UNKNOWN	MIM	MITOCHONDRION	UNKNOWN	0	0	0	1	0.00301	0.00153	0.00164	0.00176	0.00173	0.98112	0.00148	0.0022	0.00147	0.00108	0.00158	0.0014
Q56ZI2	AT1G22530	PATL2	Patellin-2	PM+VACUOLE	UNKNOWN	UNKNOWN	PM	VACUOLE	0	0.27003	0	1	0.00106	0.03004	0.00465	0.00479	0.0052	0.00305	0.00209	0.00254	0.598	0.01426	0.00185	0.33245
Q0WP01	AT1G22540	NPF5.10	Protein NRT1/ PTR FAMILY 5.10	VACUOLE	UNKNOWN	UNKNOWN	VACUOLE	UNKNOWN	0	0	0	1	0.00477	0.00993	0.00338	0.00367	0.00296	0.07513	0.00395	0.02472	0.00338	0.00194	0.03126	0.83493
Q9SK99	AT1G22570	NPF5.15	Protein NRT1/ PTR FAMILY 5.15	VACUOLE+cytosol	UNKNOWN	UNKNOWN	VACUOLE	UNKNOWN	0.00036	0.00036	0	0.9881	0.00267	0.16429	0.00608	0.04532	0.01002	0.00773	0.00284	0.00293	0.00645	0.0037	0.01531	0.73267
Q9SKA3	AT1G22610	MCTP6	Multiple C2 domain and transmembrane region protein 6	?ER+CHLOROPLAST+pm?	UNKNOWN	EXTRACELLULAR	UNKNOWN	UNKNOWN	0.61451	0.61451	0.01607	1	0.36311	0.00259	0.41616	0.00461	0.01599	0.0024	0.00493	0.06665	0.10594	0.00527	0.00931	0.00304
Q7XZU3	AT1G22620	SAC1	Phosphatidylinositol-3-phosphatase SAC1	VACUOLE+cytosol	UNKNOWN	UNKNOWN	VACUOLE	CYTOSOL	0	0.0014	0	1	0.00179	0.18747	0.00548	0.02661	0.00399	0.00279	0.00315	0.00298	0.02266	0.0026	0.00586	0.73463
Q94K06	AT1G22660	Q94K06	Polynucleotide adenylyltransferase family protein	CYTOSOL+MITOCHONDRION	UNKNOWN	UNKNOWN	CYTOSOL	MITOCHONDRION	0	0.14564	0	1	0.00619	0.63471	0.00189	0.00745	0.00258	0.30714	0.00456	0.01606	0.00406	0.00295	0.00727	0.00513
F4I2Y3	AT1G22670	RMR3	Receptor homology region, transmembrane domain- and RING domain-containing protein 3	CYTOSOL+EXTRACELLULAR	UNKNOWN	UNKNOWN	CYTOSOL	EXTRACELLULAR	0	0.28852	0	0.5119	0.00277	0.59676	0.00285	0.32668	0.00525	0.00967	0.01236	0.00437	0.00952	0.00531	0.01107	0.01339
F4I2Z0	AT1G22700	PYG7	Tetratricopeptide repeat	CHLOROPLAST	CHLOROPLAST	PLASTID MEMBRANE	CHLOROPLAST	UNKNOWN	0	0	0	1	0.9787	0.0004	0.00247	0.00118	0.00146	0.00129	0.00224	0.00839	0.00103	0.00082	0.00136	0.00065
O80548	AT1G22730	MRF2	MA3 DOMAIN-CONTAINING TRANSLATION REGULATORY FACTOR 2	CYTOSOL	UNKNOWN	UNKNOWN	CYTOSOL	UNKNOWN	0	0	0	1	0.0025	0.90351	0.00143	0.00333	0.00143	0.02637	0.00404	0.0122	0.0036	0.00182	0.0353	0.00448
O64379	AT1G22750	O64379	AT1G22750 protein	?VACUOLE+GOLGI+er	UNKNOWN	UNKNOWN	UNKNOWN	UNKNOWN	0.38513	0.38513	0.02318	1	0.0042	0.00626	0.17786	0.00883	0.23382	0.00515	0.00252	0.0025	0.07559	0.01161	0.00502	0.46663
O64380	AT1G22760	PAB3	Polyadenylate-binding protein 3	PEROXISOME+MITOCHONDRION	UNKNOWN	UNKNOWN	PEROXISOME	MITOCHONDRION	0	0.47517	0	0.64286	0.01568	0.00361	0.00265	0.00391	0.00281	0.43822	0.01859	0.5006	0.00193	0.00275	0.00629	0.00297
Q9SQI2	AT1G22770	GI	Protein GIGANTEA	PEROXISOME+NUCLEUS	UNKNOWN	NUCLEUS	PEROXISOME	NUCLEUS	0	0.28141	0	0.65476	0.07085	0.0026	0.00269	0.0086	0.00248	0.00211	0.30695	0.58068	0.00228	0.00442	0.01522	0.00113
P34788	AT1G22780;AT1G34030;AT4G09800	RPS18A; RPS18B; RPS18C	Small ribosomal subunit protein uS13z/uS13y/uS13x	CYTOSOL	CYTOSOL	RIBOSOMAL	CYTOSOL	UNKNOWN	0	0	0	1	0.00106	0.94304	0.00104	0.00644	0.00124	0.00179	0.01436	0.00402	0.00704	0.00148	0.00313	0.01535
O80543	AT1G22800	O80543	Putative methyltransferase At1g22800, mitochondrial	MITOCHONDRION	MITOCHONDRION	UNKNOWN	MITOCHONDRION	UNKNOWN	0	0	0	1	0.00159	0.00114	0.00208	0.00271	0.00209	0.97629	0.0025	0.00577	0.00144	0.00176	0.00167	0.00094
O23138	AT1G22840	CYTC-1	Cytochrome c-1	MITOCHONDRION	UNKNOWN	UNKNOWN	MITOCHONDRION	UNKNOWN	0	0	0	0.7619	0.00094	0.00152	0.00616	0.00305	0.00225	0.9698	0.00138	0.00253	0.00367	0.00466	0.0022	0.00184
O23137	AT1G22850	F29G20.19	At1g22850/F29G20_19	CHLOROPLAST	UNKNOWN	UNKNOWN	CHLOROPLAST	UNKNOWN	0	0	0	0.7381	0.97977	0.00043	0.00482	0.00123	0.00242	0.00113	0.00104	0.00106	0.00143	0.00155	0.00417	0.00095
F4I312	AT1G22860	VPS3	Vacuolar sorting protein 3	CYTOSOL+vacuole?	UNKNOWN	UNKNOWN	CYTOSOL	UNKNOWN	0.00011	0.00011	0	1	0.03792	0.73468	0.0014	0.00634	0.00113	0.00218	0.03074	0.01641	0.03	0.00116	0.01325	0.1248
F4I316	AT1G22882	SUN3	SUN domain-containing protein 3	ER	UNKNOWN	UNKNOWN	ER	UNKNOWN	0	0	0	1	0.01198	0.00173	0.89253	0.00218	0.01219	0.00685	0.00315	0.04441	0.00951	0.00757	0.0046	0.0033
Q8LAZ7	AT1G22920	CSN5A	COP9 signalosome complex subunit 5a	CYTOSOL+NUCLEUS	UNKNOWN	UNKNOWN	CYTOSOL	NUCLEUS	0	0.4702	0	1	0.00165	0.51584	0.0014	0.00262	0.002	0.00401	0.44121	0.00502	0.00713	0.00264	0.00448	0.012
O23129	AT1G22930	O23129	T-complex protein 11	CYTOSOL+nucleus?	UNKNOWN	UNKNOWN	CYTOSOL	UNKNOWN	0.0006	0.0006	0	0.82143	0.00505	0.73389	0.00101	0.00316	0.0012	0.00567	0.13919	0.05197	0.00587	0.00244	0.04395	0.00658
Q5M731	AT1G22940	TH1	Thiamine biosynthetic bifunctional enzyme TH1, chloroplastic [Includes: Thiamine-phosphate synthase	CHLOROPLAST+CYTOSOL	UNKNOWN	UNKNOWN	CHLOROPLAST	CYTOSOL	0	0.01634	0	1	0.67644	0.2443	0.00478	0.00898	0.0019	0.00143	0.00342	0.00454	0.01143	0.00193	0.0304	0.01045
Q3ED68	AT1G22950	ICU11	2-oxoglutarate and iron-dependent oxygenase domain-containing protein ICU11	NUCLEUS	UNKNOWN	UNKNOWN	NUCLEUS	UNKNOWN	0	0	0	0.82143	0.00188	0.00135	0.00073	0.00144	0.00085	0.00226	0.98527	0.00226	0.00091	0.00061	0.0014	0.00105
A0A1P8AT63	AT1G22970	A0A1P8AT63	Cyclin-D1-binding protein	CYTOSOL+chloroplast?	UNKNOWN	UNKNOWN	CYTOSOL	UNKNOWN	0	0	0	1	0.10865	0.78442	0.00254	0.02337	0.00229	0.00235	0.01939	0.01483	0.00683	0.00204	0.03026	0.00304
A8MQX0	AT1G23080	PIN7	Auxin efflux carrier component	PM+tgn?	UNKNOWN	UNKNOWN	PM	TGN	0	0.00247	0	0.86905	0.0013	0.01858	0.00836	0.00449	0.01481	0.00334	0.00229	0.00496	0.70131	0.1416	0.00633	0.09264
Q8LDC9	AT1G23100	Q8LDC9	Protein groES	MITOCHONDRION	UNKNOWN	UNKNOWN	MITOCHONDRION	UNKNOWN	0	0	0	1	0.00805	0.00167	0.00119	0.00218	0.00154	0.97312	0.00409	0.0036	0.00114	0.00091	0.0012	0.00132
O49303	AT1G23140	CAR8	Protein C2-DOMAIN ABA-RELATED 8	CYTOSOL+golgi?	UNKNOWN	CYTOSOL	CYTOSOL	UNKNOWN	1e-05	1e-05	0	1	0.0046	0.71929	0.07403	0.02909	0.1112	0.00608	0.00333	0.00326	0.01755	0.0184	0.00724	0.00593
F4I4N4	AT1G23170	F4I4N4	Uncharacterized protein	EXTRACELLULAR	UNKNOWN	UNKNOWN	EXTRACELLULAR	UNKNOWN	0	0	0	1	0.00453	0.02983	0.07694	0.82271	0.01165	0.00478	0.00498	0.00443	0.01461	0.005	0.00808	0.01246
Q8H0U3	AT1G23180	Q8H0U3	ARM repeat superfamily protein	CHLOROPLAST	CHLOROPLAST	UNKNOWN	CHLOROPLAST	UNKNOWN	0	0	0	1	0.98357	0.0007	0.00306	0.00152	0.00112	0.0005	0.00132	0.00134	0.00197	0.00138	0.00246	0.00106
O49299	AT1G23190	O49299	Probable phosphoglucomutase, cytoplasmic 1	CYTOSOL	CYTOSOL	CYTOSOL	CYTOSOL	UNKNOWN	0	0	0	1	0.00099	0.91623	0.0058	0.00402	0.00221	0.00175	0.00227	0.00167	0.04018	0.01327	0.00306	0.00856
A0A1P8AUG4	AT1G23230	MED23	Mediator of RNA polymerase II transcription subunit	NUCLEUS	UNKNOWN	UNKNOWN	NUCLEUS	UNKNOWN	0	0	0	1	0.00562	0.00095	0.00069	0.00266	0.00109	0.00329	0.97766	0.00324	0.00079	0.00053	0.00283	0.00065
Q93YP0	AT1G23260	UEV1A	Ubiquitin-conjugating enzyme E2 variant 1A	CYTOSOL+PM	UNKNOWN	UNKNOWN	CYTOSOL	PM	0	0.50912	0	1	0.00427	0.40263	0.02077	0.07489	0.00445	0.00487	0.00761	0.00833	0.36685	0.00606	0.09188	0.0074
F4I4Q1	AT1G23280	F4I4Q1	Protein MAK16 homolog	NUCLEUS	UNKNOWN	UNKNOWN	NUCLEUS	UNKNOWN	0	0	0	1	0.00203	0.00126	0.00088	0.00376	0.00156	0.00208	0.98234	0.00191	0.00115	0.00078	0.00134	0.00091
Q9LR30	AT1G23310	GGAT1	Glutamate--glyoxylate aminotransferase 1	PEROXISOME+vacuole?	UNKNOWN	UNKNOWN	PEROXISOME	UNKNOWN	0	0	0	1	0.00177	0.01761	0.0026	0.00309	0.00175	0.0041	0.00244	0.83912	0.01146	0.00532	0.00909	0.10164
Q9C5G6	AT1G23440	Q9C5G6	Peptidase C15, pyroglutamyl peptidase I-like protein	CYTOSOL	CYTOSOL	CYTOSOL	CYTOSOL	UNKNOWN	0	0	0	1	0.00178	0.95106	0.0012	0.01246	0.00138	0.0039	0.01014	0.00388	0.00249	0.00157	0.00477	0.00537
A0A1P8AMU9	AT1G23460	A0A1P8AMU9	endo-polygalacturonase	NUCLEUS+er	UNKNOWN	UNKNOWN	NUCLEUS	ER	0	0.00101	0	1	0.00594	0.00118	0.17216	0.01277	0.01447	0.0037	0.73745	0.00629	0.0079	0.03214	0.00397	0.00205
A0A1P8AM77	AT1G23540	PERK12	non-specific serine/threonine protein kinase	PM+vacuole	UNKNOWN	UNKNOWN	PM	VACUOLE	0	0.13193	0	0.88095	0.0048	0.00459	0.08968	0.02455	0.00928	0.0029	0.0138	0.006	0.65321	0.00408	0.02816	0.15894
Q9ZUC4	AT1G23710	Q9ZUC4	At1g23710	PM	UNKNOWN	UNKNOWN	PM	UNKNOWN	0	0	0	0.97619	0.00316	0.05651	0.00166	0.00471	0.00238	0.00422	0.00806	0.00305	0.81291	0.00253	0.06724	0.03356
Q9ZUC1	AT1G23740	AOR	NADPH-dependent alkenal/one oxidoreductase, chloroplastic	CHLOROPLAST	CHLOROPLAST	PLASTID STROMA	CHLOROPLAST	UNKNOWN	0	0	0	1	0.97862	0.00211	0.00285	0.00284	0.00111	0.00047	0.00108	0.00187	0.00241	0.00096	0.00399	0.00169
Q9ZUC0	AT1G23750	Q9ZUC0	F5O8.30 protein	CYTOSOL+EXTRACELLULAR	UNKNOWN	UNKNOWN	CYTOSOL	EXTRACELLULAR	0	0.29897	0	1	0.00327	0.53528	0.00491	0.32227	0.00634	0.00556	0.06115	0.00698	0.02202	0.00523	0.01158	0.0154
Q9ZUB8	AT1G23780	SKIP22	F-box protein SKIP22	?CYTOSOL+NUCLEUS+chloroplast	UNKNOWN	UNKNOWN	UNKNOWN	UNKNOWN	0.51489	0.51489	0.01507	0.5	0.18281	0.41993	0.0034	0.02147	0.00235	0.00239	0.30393	0.00946	0.01008	0.00251	0.03025	0.01142
Q8S528	AT1G23800	ALDH2B7	Aldehyde dehydrogenase family 2 member B7, mitochondrial	MITOCHONDRION	MITOCHONDRION	UNKNOWN	MITOCHONDRION	UNKNOWN	0	0	0	1	0.00432	0.00108	0.00163	0.00175	0.00152	0.97473	0.00307	0.00659	0.00138	0.00113	0.00155	0.00123
Q9ZUB3	AT1G23820	SPDSYN1	Spermidine synthase 1	CYTOSOL	CYTOSOL	CYTOSOL	CYTOSOL	UNKNOWN	0	0	0	1	0.00105	0.97287	0.00174	0.00146	0.00113	0.00196	0.00175	0.00171	0.00425	0.00211	0.00313	0.00684
O81127	AT1G23860	RSZ21	Serine/arginine-rich splicing factor RSZ21	NUCLEUS	NUCLEUS	NUCLEUS	NUCLEUS	UNKNOWN	0	0	0	1	0.00163	0.00134	0.00118	0.0013	0.00137	0.00138	0.98507	0.00196	0.00114	0.00109	0.0014	0.00111
Q84K16	AT1G23900	GAMMA-ADR	AP-1 complex subunit gamma-1	CYTOSOL+extracellular?+chloroplast?	UNKNOWN	UNKNOWN	CYTOSOL	UNKNOWN	0.00044	0.00044	0	1	0.10178	0.72703	0.00261	0.11205	0.00262	0.00331	0.00473	0.01593	0.00758	0.00328	0.01063	0.00844
A0A1P8AMQ7	AT1G23915	A0A1P8AMQ7	Uncharacterized protein	CYTOSOL+NUCLEUS	UNKNOWN	UNKNOWN	CYTOSOL	NUCLEUS	0	0.49075	0	0.75	0.00274	0.47013	0.00137	0.00777	0.00155	0.00576	0.44798	0.04033	0.00583	0.00271	0.00807	0.00576
Q8L466	AT1G24050	Q8L466	At1g24050/T23E23_11	CYTOSOL+NUCLEUS	UNKNOWN	UNKNOWN	CYTOSOL	NUCLEUS	0	0.44799	0	0.9881	0.00216	0.5323	0.00133	0.00352	0.00191	0.00484	0.42654	0.00657	0.00555	0.00242	0.00546	0.00739
F4I7R5	AT1G24090	RNH1C	RNase H domain-containing protein	MITOCHONDRION	UNKNOWN	UNKNOWN	MITOCHONDRION	UNKNOWN	0	0	0	0.61905	0.00581	0.00163	0.00127	0.00368	0.00306	0.91079	0.05848	0.00845	0.00114	0.00102	0.00298	0.0017
Q9LR85	AT1G24095	Q9LR85	T23E23.25	MITOCHONDRION	MITOCHONDRION	UNKNOWN	MITOCHONDRION	UNKNOWN	0	0	0	1	0.00175	0.00133	0.00277	0.00281	0.00114	0.97673	0.00149	0.00163	0.00352	0.00216	0.00163	0.00303
O48676	AT1G24100	UGT74B1	UDP-glycosyltransferase 74B1	CYTOSOL	UNKNOWN	UNKNOWN	CYTOSOL	UNKNOWN	0	0	0	0.94048	0.00094	0.96116	0.00109	0.0021	0.00121	0.00301	0.00755	0.00089	0.00198	0.0019	0.00496	0.01322
Q8VXV4	AT1G24120	ATJ16	Chaperone protein dnaJ 16	?CYTOSOL+PM+NUCLEUS+unknown?	UNKNOWN	UNKNOWN	UNKNOWN	UNKNOWN	0.70424	0.70424	0.10316	0.88095	0.00555	0.32682	0.00453	0.02515	0.00228	0.00394	0.21067	0.00665	0.29189	0.00357	0.1068	0.01214
O48683	AT1G24160	O48683	F3I6.9 protein	UNKNOWN	UNKNOWN	UNKNOWN	UNKNOWN	UNKNOWN	0	0	0	0.64286	0.00204	0.02274	0.00405	0.0041	0.00367	0.0081	0.04306	0.00371	0.03336	0.00684	0.83534	0.03299
O48684	AT1G24170	GATL8	Probable galacturonosyltransferase-like 8	GOLGI+EXTRACELLULAR	UNKNOWN	UNKNOWN	GOLGI	EXTRACELLULAR	0	0.25191	0	0.86905	0.00954	0.00162	0.04478	0.24314	0.58206	0.06241	0.00332	0.02581	0.00143	0.00535	0.01862	0.00192
Q8H1Y0	AT1G24180	IAR4	Pyruvate dehydrogenase E1 component subunit alpha-2, mitochondrial	MITOCHONDRION	MITOCHONDRION	UNKNOWN	MITOCHONDRION	UNKNOWN	0	0	0	1	0.00397	0.00118	0.00138	0.00169	0.00151	0.98055	0.00254	0.00273	0.00114	0.00101	0.00108	0.0012
F4I962	AT1G24190	SNL3	SIN3-like 3	NUCLEUS	UNKNOWN	NUCLEUS	NUCLEUS	UNKNOWN	0	0	0	0.5119	0.00242	0.001	0.00092	0.00267	0.00113	0.00204	0.98215	0.00344	0.00109	0.00096	0.00142	0.00075
O48691	AT1G24240	O48691	At1g24240/F3I6_17	MITOCHONDRION	UNKNOWN	UNKNOWN	MITOCHONDRION	UNKNOWN	0	0	0	0.75	0.00179	0.00155	0.0011	0.00198	0.00155	0.97895	0.00618	0.00154	0.00111	0.00108	0.00174	0.00144
F4I978	AT1G24267	F4I978	BZIP transcription factor, putative	MITOCHONDRION+cytosol?	UNKNOWN	MOM	MITOCHONDRION	UNKNOWN	0	0	0	0.97619	0.0014	0.11705	0.00205	0.00489	0.00203	0.80444	0.00399	0.00462	0.00475	0.00234	0.03659	0.01586
Q8L743	AT1G24280	G6PD3	Glucose-6-phosphate 1-dehydrogenase 3, chloroplastic	CHLOROPLAST+NUCLEUS	CHLOROPLAST	UNKNOWN	CHLOROPLAST	NUCLEUS	0	0.04271	0	1	0.71057	0.00212	0.00161	0.00472	0.00099	0.00244	0.25526	0.0159	0.00174	0.00077	0.00264	0.00125
O48696	AT1G24290	O48696	AAA-type ATPase family protein	NUCLEUS	UNKNOWN	UNKNOWN	NUCLEUS	UNKNOWN	0	0	0	0.86905	0.01966	0.00153	0.00114	0.00294	0.00172	0.04992	0.90534	0.00555	0.00104	0.00057	0.00968	0.0009
F4I983	AT1G24300	F4I983	GYF domain-containing protein	PM+UNKNOWN+vacuole?	UNKNOWN	UNKNOWN	PM	UNKNOWN	0	0.32516	0	0.75	0.00223	0.02344	0.00799	0.01683	0.00844	0.00309	0.0193	0.0274	0.48659	0.00776	0.27057	0.12636
Q8GYF7	AT1G24310	NUP54	Nuclear pore complex protein NUP54	NUCLEUS	NUCLEUS	NUCLEUS	NUCLEUS	UNKNOWN	0	0	0	0.97619	0.00123	0.00971	0.00127	0.00063	0.00084	0.0014	0.96597	0.00205	0.00388	0.00122	0.0036	0.00819
Q8GYJ7	AT1G24340	EMB2421	FAD/NAD(P)-binding oxidoreductase family protein	MITOCHONDRION	MITOCHONDRION	UNKNOWN	MITOCHONDRION	UNKNOWN	0	0	0	1	0.00236	0.00138	0.00279	0.00186	0.00137	0.97577	0.00134	0.00473	0.00257	0.00215	0.00203	0.00167
P33207	AT1G24360	P33207	3-oxoacyl-[acyl-carrier-protein] reductase, chloroplastic	CHLOROPLAST	CHLOROPLAST	PLASTID STROMA	CHLOROPLAST	UNKNOWN	0	0	0	1	0.95655	0.00081	0.00111	0.00097	0.00087	0.00403	0.02567	0.00621	0.00095	0.00046	0.00136	0.00102
Q9FYL8	AT1G24450	NFD2	Protein NUCLEAR FUSION DEFECTIVE 2	?CYTOSOL+nucleus+peroxisome+unknown	UNKNOWN	UNKNOWN	UNKNOWN	UNKNOWN	0.28415	0.28415	0.06034	0.72619	0.00235	0.47671	0.00148	0.00632	0.00187	0.00754	0.1628	0.15173	0.00745	0.00366	0.15134	0.02673
F4I9A2	AT1G24460	TNO1	Trans-Golgi network-localized SYP41-interacting protein 1	?UNKNOWN+NUCLEUS+CYTOSOL	UNKNOWN	UNKNOWN	UNKNOWN	UNKNOWN	0.6299	0.6299	0.06374	0.75	0.00484	0.22886	0.00364	0.04029	0.00505	0.00513	0.3059	0.00908	0.02187	0.00362	0.36667	0.00504
Q9FYL3	AT1G24490	ALB4	ALBINO3-like protein 1, chloroplastic	CHLOROPLAST	UNKNOWN	PLASTID MEMBRANE	CHLOROPLAST	UNKNOWN	0	0	0	0.97619	0.98714	0.00042	0.00129	0.00126	0.00138	0.00098	0.00254	0.00178	0.00069	0.0007	0.00115	0.00066
O04450	AT1G24510	CCT5	T-complex protein 1 subunit epsilon	NUCLEUS+VACUOLE+cytosol?	UNKNOWN	UNKNOWN	NUCLEUS	VACUOLE	2e-05	0.52112	2e-05	1	0.00181	0.12208	0.00143	0.00171	0.00227	0.00546	0.43425	0.00482	0.02559	0.00156	0.00343	0.39558
Q9FYL1	AT1G24530	Q9FYL1	F21J9.19	PM	UNKNOWN	UNKNOWN	PM	UNKNOWN	0	0	0	0.7381	0.00387	0.05911	0.00445	0.01405	0.00526	0.00412	0.06885	0.00489	0.80576	0.01341	0.01354	0.00268
Q8LPK7	AT1G24560	PUF2	Paramyosin	CYTOSOL+NUCLEUS	UNKNOWN	UNKNOWN	CYTOSOL	NUCLEUS	0	0.35495	0	1	0.00204	0.54656	0.00301	0.03331	0.00318	0.00394	0.33393	0.00805	0.03988	0.00345	0.01736	0.00528
Q9FYK3	AT1G24610	Q9FYK3	F21J9.27	MITOCHONDRION	UNKNOWN	UNKNOWN	MITOCHONDRION	UNKNOWN	0	0	0	1	0.00342	0.02778	0.00308	0.00321	0.00161	0.91769	0.00172	0.00219	0.00545	0.00257	0.02618	0.00509
Q9FYK0	AT1G24650	TMK2	Receptor-like kinase TMK2	PM	UNKNOWN	UNKNOWN	PM	UNKNOWN	0	0	0	1	0.0043	0.00141	0.00584	0.00273	0.00382	0.00172	0.00153	0.00259	0.96025	0.00775	0.00257	0.0055
F4IAT3	AT1G24706	THO2	THO complex subunit 2	NUCLEUS	NUCLEUS	NUCLEUS	NUCLEUS	UNKNOWN	0	0	0	1	0.00256	0.00469	0.00237	0.03606	0.00216	0.0028	0.93331	0.00429	0.00404	0.00189	0.00354	0.00229
A0A1P8ATC8	AT1G24764	MAP70-2	Microtubule-associated proteins 70-2	?VACUOLE+NUCLEUS+unknown+pm	UNKNOWN	UNKNOWN	UNKNOWN	UNKNOWN	0.66744	0.66744	0.27099	0.7619	0.00301	0.03842	0.0038	0.0051	0.00252	0.00422	0.28994	0.00587	0.16523	0.00349	0.17317	0.30522
P0DI04	AT1G25055	P0DI04	F-box/kelch-repeat protein At1g25055	NUCLEUS	UNKNOWN	UNKNOWN	NUCLEUS	UNKNOWN	0	0	0	1	0.00165	0.00223	0.00084	0.00202	0.001	0.00183	0.98397	0.00163	0.00113	0.00075	0.0017	0.00125
Q42565	AT1G25220	ASB1	Anthranilate synthase beta subunit 1, chloroplastic	CHLOROPLAST	UNKNOWN	UNKNOWN	CHLOROPLAST	UNKNOWN	0	0	0	0.88095	0.97297	0.00092	0.0014	0.0012	0.00054	0.00363	0.0033	0.00993	0.00116	0.00078	0.00232	0.00187
Q94AK8	AT1G25260	RDP1	Ribosome assembly factor mrt4	NUCLEUS	UNKNOWN	RIBOSOMAL	NUCLEUS	UNKNOWN	0	0	0	1	0.00203	0.00166	0.00087	0.00349	0.00127	0.00189	0.9823	0.00194	0.00118	0.00089	0.0014	0.00109
Q9FRH7	AT1G25280	TULP10	Tubby-like F-box protein 10	?EXTRACELLULAR+PM+vacuole?+er?+cytosol?	UNKNOWN	UNKNOWN	UNKNOWN	UNKNOWN	0.58687	0.58687	0.04139	0.64286	0.00435	0.10412	0.10581	0.30318	0.004	0.00951	0.01068	0.04022	0.22039	0.00686	0.06351	0.12736
F4ICF4	AT1G25290	RBL10	RHOMBOID-like protein 10, chloroplastic	CHLOROPLAST	UNKNOWN	PLASTID MEMBRANE	CHLOROPLAST	UNKNOWN	0	0	0	0.60714	0.91271	0.00067	0.00392	0.00301	0.01031	0.00504	0.00351	0.05437	0.00155	0.00192	0.00183	0.00117
Q9FRI1	AT1G25320	LRR-RLK	At1g25320/F4F7_17	PM	UNKNOWN	UNKNOWN	PM	UNKNOWN	0	0	0	0.61905	0.00443	0.00196	0.00514	0.0037	0.00452	0.00256	0.01374	0.00184	0.94035	0.00999	0.00709	0.00466
Q8W4F3	AT1G25350	OVA9	Glutamine--tRNA ligase, cytoplasmic	CYTOSOL	CYTOSOL	CYTOSOL	CYTOSOL	UNKNOWN	0	0	0	1	0.00118	0.97518	0.0012	0.0026	0.00122	0.00184	0.00319	0.00166	0.00271	0.00185	0.00267	0.00469
Q682P6	AT1G25375	Q682P6	Metallo-hydrolase/oxidoreductase superfamily protein	PEROXISOME+MITOCHONDRION	UNKNOWN	UNKNOWN	PEROXISOME	MITOCHONDRION	0	0.26938	0	1	0.00299	0.00471	0.01943	0.00623	0.01386	0.30634	0.00522	0.60555	0.00398	0.01029	0.01788	0.00352
Q8RWA5	AT1G25380	NDT2	Nicotinamide adenine dinucleotide transporter 2, mitochondrial	MITOCHONDRION	MITOCHONDRION	UNKNOWN	MITOCHONDRION	UNKNOWN	0	0	0	1	0.00849	0.00104	0.00149	0.00248	0.00197	0.97513	0.00276	0.00213	0.00109	0.00089	0.00141	0.00111
Q9C6K9	AT1G25390	LRK10L-1.1	LEAF RUST 10 DISEASE-RESISTANCE LOCUS RECEPTOR-LIKE PROTEIN KINASE-like 1.1	PM	UNKNOWN	UNKNOWN	PM	UNKNOWN	0	0	0	0.72619	0.00618	0.0028	0.02239	0.00858	0.01252	0.00222	0.0191	0.0049	0.87411	0.02311	0.02185	0.00224
A0A1P8ANA1	AT1G25420	ISTL2	Regulator of Vps4 activity in the MVB pathway protein	?PM+NUCLEUS+cytosol	UNKNOWN	UNKNOWN	UNKNOWN	UNKNOWN	0.48156	0.48156	0.12032	0.5	0.00361	0.15701	0.0021	0.00812	0.00184	0.00559	0.32278	0.0077	0.43503	0.00351	0.0047	0.048
Q9C6L2	AT1G25420	ISTL2	At1g25420/F2J7_16	CYTOSOL+VACUOLE	UNKNOWN	UNKNOWN	CYTOSOL	VACUOLE	0	0.43836	0	0.5	0.00209	0.49954	0.00207	0.01115	0.00253	0.00293	0.04136	0.00333	0.03204	0.00151	0.01651	0.38493
Q38845	AT1G25490	PP2AA1	Serine/threonine-protein phosphatase 2A 65 kDa regulatory subunit A alpha isoform	CYTOSOL+vacuole?	UNKNOWN	UNKNOWN	CYTOSOL	UNKNOWN	0	0	0	1	0.00089	0.81527	0.00443	0.00511	0.00149	0.00215	0.00294	0.00186	0.04166	0.00223	0.00586	0.1161
Q7XYY2	AT1G25540	MED25	Mediator of RNA polymerase II transcription subunit 25	NUCLEUS	UNKNOWN	UNKNOWN	NUCLEUS	UNKNOWN	0	0	0	1	0.00261	0.00222	0.0009	0.00208	0.00093	0.02829	0.9436	0.01216	0.00095	0.00066	0.00424	0.00136
F4ICJ5	AT1G25570	LLR1	Di-glucose binding protein with Leucine-rich repeat domain-containing protein	TGN	TGN	TGN	TGN	UNKNOWN	0	0	0	1	0.00087	0.00484	0.00733	0.00308	0.00498	0.00208	0.00174	0.00213	0.00665	0.95166	0.00384	0.0108
Q6NQK2	AT1G25580	SOG1	SUPPRESSOR OF GAMMA RESPONSE 1	CYTOSOL	UNKNOWN	UNKNOWN	CYTOSOL	UNKNOWN	0	0	0	0.84524	0.00421	0.78372	0.00189	0.01199	0.0014	0.0366	0.00412	0.07747	0.00364	0.00278	0.04818	0.02399
Q6DYE4	AT1G26090	GET3D	ATPase GET3D, chloroplastic	CHLOROPLAST	UNKNOWN	UNKNOWN	CHLOROPLAST	UNKNOWN	0	0	0	0.86905	0.98632	0.00086	0.00148	0.00082	0.00079	0.0013	0.00171	0.00117	0.00118	0.00075	0.00185	0.00178
Q9C540	AT1G26100	CYB561D	Probable transmembrane ascorbate ferrireductase 4	GOLGI	UNKNOWN	UNKNOWN	GOLGI	UNKNOWN	0	0	0	0.7381	0.00355	0.00194	0.07696	0.03923	0.83538	0.00223	0.01792	0.00181	0.00353	0.01065	0.00418	0.00262
Q9C658	AT1G26110	DCP5	Protein decapping 5	CYTOSOL+VACUOLE	UNKNOWN	UNKNOWN	CYTOSOL	VACUOLE	0	0.28439	0	1	0.00107	0.58266	0.00242	0.01224	0.00251	0.00322	0.01425	0.00205	0.01421	0.00191	0.00643	0.35704
Q8VYP9	AT1G26120	ICMEL1	Probable isoprenylcysteine alpha-carbonyl methylesterase ICMEL1	TGN	UNKNOWN	UNKNOWN	TGN	UNKNOWN	0	0	0	1	0.01833	0.00564	0.01477	0.00501	0.0033	0.00311	0.00164	0.01053	0.03425	0.85191	0.01612	0.03541
F4IE35	AT1G26130	F4IE35	Phospholipid-transporting ATPase	PM	UNKNOWN	UNKNOWN	PM	UNKNOWN	0	0	0	1	0.00301	0.00241	0.00381	0.00365	0.0028	0.00224	0.00522	0.00349	0.96231	0.00302	0.00524	0.00279
Q9C660	AT1G26150	PERK10	Proline-rich receptor-like protein kinase PERK10	PM	PM	PM	PM	UNKNOWN	0	0	0	1	0.00233	0.00969	0.00189	0.00388	0.00266	0.00229	0.0046	0.0024	0.94423	0.00246	0.01381	0.00977
Q93ZV1	AT1G26160	Q93ZV1	5'-deoxynucleotidase	CHLOROPLAST	CHLOROPLAST	PLASTID STROMA	CHLOROPLAST	UNKNOWN	0	0	0	1	0.98394	0.00232	0.00157	0.00169	0.0008	0.0007	0.00124	0.0015	0.00136	0.00056	0.00287	0.00147
F4IE40	AT1G26170	F4IE40	ARM repeat superfamily protein	CYTOSOL	UNKNOWN	UNKNOWN	CYTOSOL	UNKNOWN	0	0	0	1	0.00107	0.89617	0.00549	0.00686	0.0019	0.00173	0.00348	0.00196	0.06401	0.004	0.00475	0.00857
Q941A9	AT1G26300	Q941A9	At1g26300/F28B23_4	VACUOLE	UNKNOWN	UNKNOWN	VACUOLE	UNKNOWN	0	0	0	1	0.00156	0.03828	0.00777	0.02832	0.00557	0.00247	0.00457	0.00219	0.01506	0.0049	0.00381	0.88549
Q9FDW8	AT1G26340	CB5-A	Cytochrome b5 isoform A	?PEROXISOME+CYTOSOL+mitochondrion	UNKNOWN	UNKNOWN	UNKNOWN	UNKNOWN	0.3121	0.3121	0.00679	1	0.0018	0.22989	0.00672	0.03641	0.00592	0.15835	0.00557	0.49077	0.00961	0.00827	0.04003	0.00667
F4IE65	AT1G26360	MES13	Putative methylesterase 13, chloroplastic	CHLOROPLAST	UNKNOWN	UNKNOWN	CHLOROPLAST	UNKNOWN	0	0	0	0.5	0.95941	0.00147	0.00208	0.00238	0.00085	0.0104	0.00238	0.00729	0.00167	0.00453	0.00434	0.00322
F4IE66	AT1G26370	RID1	Pre-mRNA-splicing factor ATP-dependent RNA helicase DEAH10	NUCLEUS	UNKNOWN	UNKNOWN	NUCLEUS	UNKNOWN	0	0	0	1	0.00155	0.00111	0.00103	0.00111	0.001	0.00128	0.98624	0.00199	0.00103	0.0009	0.00152	0.00124
Q9FZD1	AT1G26460	Q9FZD1	Pentatricopeptide repeat-containing protein At1g26460, mitochondrial	MITOCHONDRION	MITOCHONDRION	UNKNOWN	MITOCHONDRION	UNKNOWN	0	0	0	1	0.00502	0.0014	0.00125	0.00186	0.00174	0.97494	0.00595	0.00335	0.00109	0.00078	0.00143	0.0012
Q500W8	AT1G26520	Q500W8	At1g26520	CYTOSOL+PM	UNKNOWN	UNKNOWN	CYTOSOL	PM	0	0.14332	0	1	0.00151	0.64302	0.00249	0.00378	0.00185	0.00341	0.00289	0.00247	0.30517	0.00378	0.0058	0.02383
Q9FZD9	AT1G26540	DUF3	DUF724 domain-containing protein 3	NUCLEUS	UNKNOWN	UNKNOWN	NUCLEUS	UNKNOWN	0	0	0	1	0.00148	0.0022	0.00129	0.00088	0.00081	0.00103	0.98157	0.00212	0.00166	0.00109	0.00396	0.00192
Q9FE18	AT1G26550	Q9FE18	Peptidyl-prolyl cis-trans isomerase	PM+NUCLEUS	UNKNOWN	UNKNOWN	PM	NUCLEUS	0	0.42441	0	1	0.00343	0.09563	0.00407	0.01528	0.00217	0.00486	0.34488	0.0085	0.49429	0.00246	0.00571	0.01873
Q9FZE1	AT1G26570	UGD1	UDP-glucose 6-dehydrogenase 1	CYTOSOL+vacuole?	UNKNOWN	UNKNOWN	CYTOSOL	UNKNOWN	1e-05	1e-05	0	1	0.00082	0.78905	0.00375	0.00401	0.00152	0.00228	0.00197	0.00152	0.042	0.00475	0.00319	0.14516
Q93VP3	AT1G26630	ELF5A-2	Eukaryotic translation initiation factor 5A-2	CYTOSOL+vacuole+nucleus?	UNKNOWN	UNKNOWN	CYTOSOL	VACUOLE	6e-05	0.02469	6e-05	1	0.00135	0.61342	0.0015	0.00499	0.00199	0.00507	0.14618	0.00421	0.03558	0.00208	0.00283	0.18079
Q8H1F7	AT1G26640	IPK	Isopentenyl phosphate kinase	PM+cytosol	UNKNOWN	UNKNOWN	PM	CYTOSOL	0	0.0063	0	1	0.00165	0.17255	0.00137	0.00656	0.0019	0.00364	0.04214	0.00329	0.67814	0.004	0.00622	0.07851
Q9LQY7	AT1G26650	Q9LQY7	Son of sevenless protein	TGN+GOLGI	UNKNOWN	UNKNOWN	TGN	GOLGI	0	0.01134	0	1	0.00553	0.00089	0.03979	0.00267	0.22413	0.00438	0.00156	0.00566	0.00227	0.70553	0.00585	0.00173
F4HPA5	AT1G26660	F4HPA5	Prefoldin chaperone subunit family protein	UNKNOWN+CYTOSOL	UNKNOWN	UNKNOWN	UNKNOWN	CYTOSOL	0	0.49254	0	0.52381	0.00215	0.41867	0.00358	0.03391	0.00347	0.00943	0.01309	0.00472	0.01168	0.00529	0.43157	0.06245
Q9SEL5	AT1G26670	VTI12	Vesicle transport v-SNARE 12	TGN	TGN	TGN	TGN	UNKNOWN	0	0	0	1	0.00088	0.05464	0.00512	0.00854	0.00318	0.00191	0.00336	0.00295	0.00893	0.90147	0.00342	0.0056
Q9LQY3	AT1G26690	Q9LQY3	Transmembrane emp24 domain-containing protein p24delta9	ER	ER	ER	ER	UNKNOWN	0	0	0	1	0.0041	0.01632	0.88147	0.04362	0.02109	0.00346	0.00337	0.00226	0.00582	0.0065	0.00724	0.00475
Q6R8G3	AT1G26730	PHO1-H7	Phosphate transporter PHO1 homolog 7	PM+peroxisome	UNKNOWN	UNKNOWN	PM	PEROXISOME	0	0.01783	0	0.63095	0.00339	0.00538	0.04018	0.04775	0.00141	0.01356	0.00363	0.15972	0.69284	0.00797	0.00332	0.02084
Q944L5	AT1G26740	Q944L5	Large ribosomal subunit protein bL32m	MITOCHONDRION	UNKNOWN	UNKNOWN	MITOCHONDRION	UNKNOWN	0	0	0	0.88095	0.003	0.00196	0.00104	0.0048	0.00267	0.93773	0.03172	0.01245	0.00118	0.00097	0.00128	0.00121
F4HPB7	AT1G26750	F4HPB7	Uncharacterized protein	MITOCHONDRION	MITOCHONDRION	UNKNOWN	MITOCHONDRION	UNKNOWN	0	0	0	0.88095	0.00138	0.00106	0.0018	0.00261	0.0022	0.98204	0.00207	0.00191	0.00105	0.00188	0.00115	0.00086
Q93ZE3	AT1G26761	Q93ZE3	Arabinanase/levansucrase/invertase	CHLOROPLAST	UNKNOWN	UNKNOWN	CHLOROPLAST	UNKNOWN	0	0	0	1	0.98092	0.00205	0.00144	0.00123	0.00057	0.00076	0.00208	0.00185	0.0017	0.00057	0.00252	0.00431
[truncated: 8,520 more rows]
